# Supplementary material
Source: PubMed Central journal article supplement (PMC8078067)
Supplement: JGMED20008391.pdf [file JGMED20008391.pdf]

| Comparison of Specialty-Specific Systems-Based Practice (SBP) Milestones |                        |                                                                                                                                                                                                                                                                                                                                                                                                                                                                                       |                                                                                                                                                                                                              |                                                                                                                                                                                                       |                                                                                                                                                                                                           |                                                                                                                                                                                      |                                                                                                                                  |                                                                                                                                                                               |                                                                                                                                                                      |                                                                                                                                                                                    |                                                                                                                                                                                |
|--------------------------------------------------------------------------|------------------------|---------------------------------------------------------------------------------------------------------------------------------------------------------------------------------------------------------------------------------------------------------------------------------------------------------------------------------------------------------------------------------------------------------------------------------------------------------------------------------------|--------------------------------------------------------------------------------------------------------------------------------------------------------------------------------------------------------------|-------------------------------------------------------------------------------------------------------------------------------------------------------------------------------------------------------|-----------------------------------------------------------------------------------------------------------------------------------------------------------------------------------------------------------|--------------------------------------------------------------------------------------------------------------------------------------------------------------------------------------|----------------------------------------------------------------------------------------------------------------------------------|-------------------------------------------------------------------------------------------------------------------------------------------------------------------------------|----------------------------------------------------------------------------------------------------------------------------------------------------------------------|------------------------------------------------------------------------------------------------------------------------------------------------------------------------------------|--------------------------------------------------------------------------------------------------------------------------------------------------------------------------------|
| Specialty                                                                | Domain                 | Current SBP                                                                                                                                                                                                                                                                                                                                                                                                                                                                           |                                                                                                                                                                                                              |                                                                                                                                                                                                       |                                                                                                                                                                                                           | Domain                                                                                                                                                                               | Future SBP - Milestones 2.0                                                                                                      |                                                                                                                                                                               |                                                                                                                                                                      |                                                                                                                                                                                    |                                                                                                                                                                                |
| Allergy/<br>Immunology                                                   | Resource use<br><br>PS | Utilizes/accesses outside resources. Demonstrates awareness of and accommodation to circumstances affecting patient care, including the patient's financial resources and other factors that can affect health care delivery and quality. Understands the basics of patient safety and clinical risk management, with emphasis on avoidance of medical errors. Uses technology and external resources to accomplish safe and effective health care delivery. — Systems-based Practice |                                                                                                                                                                                                              |                                                                                                                                                                                                       |                                                                                                                                                                                                           | PS<br><br>QI                                                                                                                                                                         | Systems-Based Practice 1: Patient Safety and Quality Improvement                                                                 |                                                                                                                                                                               |                                                                                                                                                                      |                                                                                                                                                                                    |                                                                                                                                                                                |
|                                                                          |                        | Level 1                                                                                                                                                                                                                                                                                                                                                                                                                                                                               | Level 2                                                                                                                                                                                                      | Level 3                                                                                                                                                                                               | Level 4                                                                                                                                                                                                   |                                                                                                                                                                                      | Level 5                                                                                                                          | Level 1                                                                                                                                                                       | Level 2                                                                                                                                                              | Level 3                                                                                                                                                                            | Level 4                                                                                                                                                                        |
|                                                                          |                        | <ul style="list-style-type: none"> <li>Infrequently (&lt;25% of the time) demonstrates proficiency for all aspects expected of a graduating resident, fellow, or junior independent practitioner</li> </ul>                                                                                                                                                                                                                                                                           | <ul style="list-style-type: none"> <li>Inconsistently (25-75% of the time) demonstrates proficiency for all aspects expected of a graduating resident, fellow, or junior independent practitioner</li> </ul> | <ul style="list-style-type: none"> <li>Usually (75-90% of the time) demonstrates proficiency for all aspects expected of a graduating resident, fellow, or junior independent practitioner</li> </ul> | <ul style="list-style-type: none"> <li>Constantly (&gt;90% of the time) demonstrates proficiency for all aspects expected of a graduating resident, fellow, or junior independent practitioner</li> </ul> | <ul style="list-style-type: none"> <li>Demonstrates consistency and proficiency beyond expectations for a graduating resident, fellow, or junior independent practitioner</li> </ul> | <ul style="list-style-type: none"> <li>Demonstrates knowledge of common patient safety events</li> </ul>                         | <ul style="list-style-type: none"> <li>Identifies system factors that lead to patient safety events</li> </ul>                                                                | <ul style="list-style-type: none"> <li>Participates in analysis of patient safety events (simulated or actual)</li> </ul>                                            | <ul style="list-style-type: none"> <li>Conducts analysis of patient safety events and offers error prevention strategies (simulated or actual)</li> </ul>                          | <ul style="list-style-type: none"> <li>Actively engages teams and processes to modify systems to prevent patient safety events</li> </ul>                                      |
|                                                                          |                        |                                                                                                                                                                                                                                                                                                                                                                                                                                                                                       |                                                                                                                                                                                                              |                                                                                                                                                                                                       |                                                                                                                                                                                                           |                                                                                                                                                                                      | <ul style="list-style-type: none"> <li>Demonstrates knowledge of how to report patient safety events</li> </ul>                  | <ul style="list-style-type: none"> <li>Reports patient safety events through institutional reporting systems (simulated or actual)</li> </ul>                                 | <ul style="list-style-type: none"> <li>Participates in disclosure of patient safety events to patients and families (simulated or actual)</li> </ul>                 | <ul style="list-style-type: none"> <li>Discloses patient safety events to patients and families (simulated or actual)</li> </ul>                                                   | <ul style="list-style-type: none"> <li>Role models or mentors others in the disclosure of patient safety events</li> </ul>                                                     |
|                                                                          |                        |                                                                                                                                                                                                                                                                                                                                                                                                                                                                                       |                                                                                                                                                                                                              |                                                                                                                                                                                                       |                                                                                                                                                                                                           |                                                                                                                                                                                      | <ul style="list-style-type: none"> <li>Demonstrates knowledge of basic quality improvement methodologies and metrics</li> </ul>  | <ul style="list-style-type: none"> <li>Demonstrates knowledge of and participates in local quality improvement initiatives</li> </ul>                                         | <ul style="list-style-type: none"> <li>Demonstrates the ability to identify and develop a quality improvement project or advance an existing project</li> </ul>      | <ul style="list-style-type: none"> <li>Demonstrates the ability to implement or assess quality improvement initiatives</li> </ul>                                                  | <ul style="list-style-type: none"> <li>Independently creates, implements, and assesses quality improvement initiatives</li> </ul>                                              |
| Allergy/<br>Immunology                                                   |                        |                                                                                                                                                                                                                                                                                                                                                                                                                                                                                       |                                                                                                                                                                                                              |                                                                                                                                                                                                       |                                                                                                                                                                                                           | CC                                                                                                                                                                                   | Systems-Based Practice 2: System Navigation for Patient-Centered Care                                                            |                                                                                                                                                                               |                                                                                                                                                                      |                                                                                                                                                                                    |                                                                                                                                                                                |
|                                                                          |                        |                                                                                                                                                                                                                                                                                                                                                                                                                                                                                       |                                                                                                                                                                                                              |                                                                                                                                                                                                       |                                                                                                                                                                                                           |                                                                                                                                                                                      | Level 1                                                                                                                          | Level 2                                                                                                                                                                       | Level 3                                                                                                                                                              | Level 4                                                                                                                                                                            | Level 5                                                                                                                                                                        |
|                                                                          |                        |                                                                                                                                                                                                                                                                                                                                                                                                                                                                                       |                                                                                                                                                                                                              |                                                                                                                                                                                                       |                                                                                                                                                                                                           |                                                                                                                                                                                      | <ul style="list-style-type: none"> <li>Demonstrates knowledge of care coordination</li> </ul>                                    | <ul style="list-style-type: none"> <li>Coordinates care of patients in routine clinical situations effectively using the roles of interprofessional teams</li> </ul>          | <ul style="list-style-type: none"> <li>Coordinates care of patients in complex clinical situations effectively using the roles of interprofessional teams</li> </ul> | <ul style="list-style-type: none"> <li>Role models effective coordination of patient-centered care among different disciplines and specialties</li> </ul>                          | <ul style="list-style-type: none"> <li>Analyzes the process of care coordination and leads in the design and implementation of improvements</li> </ul>                         |
|                                                                          |                        |                                                                                                                                                                                                                                                                                                                                                                                                                                                                                       |                                                                                                                                                                                                              |                                                                                                                                                                                                       |                                                                                                                                                                                                           |                                                                                                                                                                                      |                                                                                                                                  | <ul style="list-style-type: none"> <li>Identifies key elements for safe and effective transitions of care and hand-offs</li> </ul>                                            | <ul style="list-style-type: none"> <li>Performs safe and effective transitions of care/hand-offs in routine clinical situations</li> </ul>                           | <ul style="list-style-type: none"> <li>Performs safe and effective transitions of care/hand-offs in complex clinical situations</li> </ul>                                         | <ul style="list-style-type: none"> <li>Role models or improves safe and effective transitions of care/hand-offs within and across health care delivery systems</li> </ul>      |
| Allergy/<br>Immunology                                                   |                        |                                                                                                                                                                                                                                                                                                                                                                                                                                                                                       |                                                                                                                                                                                                              |                                                                                                                                                                                                       |                                                                                                                                                                                                           | HC Systems                                                                                                                                                                           | Systems-Based Practice 3: Physician Role in Health Care Systems                                                                  |                                                                                                                                                                               |                                                                                                                                                                      |                                                                                                                                                                                    |                                                                                                                                                                                |
|                                                                          |                        |                                                                                                                                                                                                                                                                                                                                                                                                                                                                                       |                                                                                                                                                                                                              |                                                                                                                                                                                                       |                                                                                                                                                                                                           |                                                                                                                                                                                      | Level 1                                                                                                                          | Level 2                                                                                                                                                                       | Level 3                                                                                                                                                              | Level 4                                                                                                                                                                            | Level 5                                                                                                                                                                        |
|                                                                          |                        |                                                                                                                                                                                                                                                                                                                                                                                                                                                                                       |                                                                                                                                                                                                              |                                                                                                                                                                                                       |                                                                                                                                                                                                           |                                                                                                                                                                                      |                                                                                                                                  | <ul style="list-style-type: none"> <li>Identifies and describes how components of a complex health care system are interrelated, and how this impacts patient care</li> </ul> | <ul style="list-style-type: none"> <li>Discusses how individual practice affects the broader system</li> </ul>                                                       | <ul style="list-style-type: none"> <li>Uses various components of the complex health care system to provide efficient and effective patient care and transition of care</li> </ul> | <ul style="list-style-type: none"> <li>Advocates for or leads systems change that enhances high-value, efficient, and effective patient care and transition of care</li> </ul> |
|                                                                          |                        |                                                                                                                                                                                                                                                                                                                                                                                                                                                                                       |                                                                                                                                                                                                              |                                                                                                                                                                                                       |                                                                                                                                                                                                           |                                                                                                                                                                                      | <ul style="list-style-type: none"> <li>Describes basic health payment systems and practice models</li> </ul>                     | <ul style="list-style-type: none"> <li>Delivers care with consideration of each patient's payment model</li> </ul>                                                            | <ul style="list-style-type: none"> <li>Engages with patients in shared decision making informed by each patient's payment models</li> </ul>                          | <ul style="list-style-type: none"> <li>Advocates for patient care needs with consideration of the limitations of the patient's payment model</li> </ul>                            | <ul style="list-style-type: none"> <li>Participates in health policy advocacy activities</li> </ul>                                                                            |
| Allergy/<br>Immunology                                                   |                        |                                                                                                                                                                                                                                                                                                                                                                                                                                                                                       |                                                                                                                                                                                                              |                                                                                                                                                                                                       |                                                                                                                                                                                                           | Population Health                                                                                                                                                                    | Systems-Based Practice 4: Community and Population Health                                                                        |                                                                                                                                                                               |                                                                                                                                                                      |                                                                                                                                                                                    |                                                                                                                                                                                |
|                                                                          |                        |                                                                                                                                                                                                                                                                                                                                                                                                                                                                                       |                                                                                                                                                                                                              |                                                                                                                                                                                                       |                                                                                                                                                                                                           |                                                                                                                                                                                      | Level 1                                                                                                                          | Level 2                                                                                                                                                                       | Level 3                                                                                                                                                              | Level 4                                                                                                                                                                            | Level 5                                                                                                                                                                        |
|                                                                          |                        |                                                                                                                                                                                                                                                                                                                                                                                                                                                                                       |                                                                                                                                                                                                              |                                                                                                                                                                                                       |                                                                                                                                                                                                           |                                                                                                                                                                                      | <ul style="list-style-type: none"> <li>Demonstrates knowledge of population or community health needs and disparities</li> </ul> | <ul style="list-style-type: none"> <li>Identifies specific population or community health needs and inequities for the local population</li> </ul>                            | <ul style="list-style-type: none"> <li>Accesses local resources to meet the needs of a specific patient population or community</li> </ul>                           | <ul style="list-style-type: none"> <li>Participates in changing and adapting practice to provide for the needs of specific populations or communities</li> </ul>                   | <ul style="list-style-type: none"> <li>Leads innovations to advocate for specific populations or communities with health care inequities</li> </ul>                            |

| <p><b>Anesthesiology</b></p>                                                                                                                                                                                                                                                                                                                                                                                                                                                                                                          | <p>CC</p>                                                                                                                                                                                                                                                                                                                                                                                                                  | <table border="1"> <thead> <tr> <th colspan="6">Systems-based Practice 1: Coordination of patient care within the health care system</th> </tr> <tr> <th>Has not Achieved Level 1</th> <th>Level 1</th> <th>Level 2</th> <th>Level 3</th> <th>Level 4</th> <th>Level 5</th> </tr> </thead> <tbody> <tr> <td></td> <td> <p>Identifies the roles of patients, families, health care providers, and systems in health care delivery and outcome</p> <p>Identifies priorities when caring for multiple patients</p> <p>Coordinates the care of an individual patient within the health care system effectively and safely</p> </td> <td> <p>Prioritizes multiple patient care activities with indirect supervision for routine procedures</p> <p>Uses system resources to facilitate cost-effective and safe non-subspecialty anesthesia care</p> </td> <td> <p>Prioritizes multiple patient care activities with indirect supervision for patients undergoing common subspecialty procedures</p> <p>Uses system resources to facilitate cost-effective and safe subspecialty anesthesia care</p> </td> <td> <p>Manages multiple patient care activities with conditional independence</p> <p>Uses system resources to facilitate and optimize cost-effective and safe longitudinal peri-operative care</p> </td> <td> <p>Effectively coordinates the management of multiple patient care activities</p> </td> </tr> </tbody> </table>                                                                                                                                                                                                                                                                                                                                                                                                                                                                                                                                                                                                                                                                                                                                                                                                                                                                                                                                                                                                                                                                                                                                                          | Systems-based Practice 1: Coordination of patient care within the health care system                                                                                                                                                                                                                                                                                                                                                    |                                                                                                                                                                                                                                                                                                                                                                        |                                                                                                                                                                                                                                                                                                                                                                                                                                                                                                                                             |  |  |                                                                                                                                                                                                                                                                                                                                                                                                                                                                                                                                       | Has not Achieved Level 1 | Level 1 | Level 2 | Level 3 | Level 4 | Level 5 |         | <p>Identifies the roles of patients, families, health care providers, and systems in health care delivery and outcome</p> <p>Identifies priorities when caring for multiple patients</p> <p>Coordinates the care of an individual patient within the health care system effectively and safely</p>                                                                                                                         | <p>Prioritizes multiple patient care activities with indirect supervision for routine procedures</p> <p>Uses system resources to facilitate cost-effective and safe non-subspecialty anesthesia care</p>                                                                                                                                                                                                                                                      | <p>Prioritizes multiple patient care activities with indirect supervision for patients undergoing common subspecialty procedures</p> <p>Uses system resources to facilitate cost-effective and safe subspecialty anesthesia care</p>                                                                                                                                                                                                    | <p>Manages multiple patient care activities with conditional independence</p> <p>Uses system resources to facilitate and optimize cost-effective and safe longitudinal peri-operative care</p>                                                                                                                                                                         | <p>Effectively coordinates the management of multiple patient care activities</p>                                                                                                                                                                                                                                                                                                                                                                                                                                                           |                                                                                                                                               |                                                                                                                                                                                                                                                                                                                                                                                                                                                                                                                                                                                                                                                                                                                                                                                                                                                                                                                                                                                                                                                                                                                                                                                                                                                                                                                                                                                                                                                                                                                                                                                                                                                                     |                                                                  |  |  |  |  |         |         |         |         |         |                                                                                                                                                                                                                 |                                                                                                                                                                                                                                                                             |                                                                                                                                                                                                                                               |                                                                                                                                                                                                                                                                                                                 |                                                                                                                                                                                                                                                                          |
|---------------------------------------------------------------------------------------------------------------------------------------------------------------------------------------------------------------------------------------------------------------------------------------------------------------------------------------------------------------------------------------------------------------------------------------------------------------------------------------------------------------------------------------|----------------------------------------------------------------------------------------------------------------------------------------------------------------------------------------------------------------------------------------------------------------------------------------------------------------------------------------------------------------------------------------------------------------------------|---------------------------------------------------------------------------------------------------------------------------------------------------------------------------------------------------------------------------------------------------------------------------------------------------------------------------------------------------------------------------------------------------------------------------------------------------------------------------------------------------------------------------------------------------------------------------------------------------------------------------------------------------------------------------------------------------------------------------------------------------------------------------------------------------------------------------------------------------------------------------------------------------------------------------------------------------------------------------------------------------------------------------------------------------------------------------------------------------------------------------------------------------------------------------------------------------------------------------------------------------------------------------------------------------------------------------------------------------------------------------------------------------------------------------------------------------------------------------------------------------------------------------------------------------------------------------------------------------------------------------------------------------------------------------------------------------------------------------------------------------------------------------------------------------------------------------------------------------------------------------------------------------------------------------------------------------------------------------------------------------------------------------------------------------------------------------------------------------------------------------------------------------------------------------------------------------------------------------------------------------------------------------------------------------------------------------------------------------------------------------------------------------------------------------------------------------------------------------------------------------------------------------------------------------------------------------------------------|-----------------------------------------------------------------------------------------------------------------------------------------------------------------------------------------------------------------------------------------------------------------------------------------------------------------------------------------------------------------------------------------------------------------------------------------|------------------------------------------------------------------------------------------------------------------------------------------------------------------------------------------------------------------------------------------------------------------------------------------------------------------------------------------------------------------------|---------------------------------------------------------------------------------------------------------------------------------------------------------------------------------------------------------------------------------------------------------------------------------------------------------------------------------------------------------------------------------------------------------------------------------------------------------------------------------------------------------------------------------------------|--|--|---------------------------------------------------------------------------------------------------------------------------------------------------------------------------------------------------------------------------------------------------------------------------------------------------------------------------------------------------------------------------------------------------------------------------------------------------------------------------------------------------------------------------------------|--------------------------|---------|---------|---------|---------|---------|---------|----------------------------------------------------------------------------------------------------------------------------------------------------------------------------------------------------------------------------------------------------------------------------------------------------------------------------------------------------------------------------------------------------------------------------|---------------------------------------------------------------------------------------------------------------------------------------------------------------------------------------------------------------------------------------------------------------------------------------------------------------------------------------------------------------------------------------------------------------------------------------------------------------|-----------------------------------------------------------------------------------------------------------------------------------------------------------------------------------------------------------------------------------------------------------------------------------------------------------------------------------------------------------------------------------------------------------------------------------------|------------------------------------------------------------------------------------------------------------------------------------------------------------------------------------------------------------------------------------------------------------------------------------------------------------------------------------------------------------------------|---------------------------------------------------------------------------------------------------------------------------------------------------------------------------------------------------------------------------------------------------------------------------------------------------------------------------------------------------------------------------------------------------------------------------------------------------------------------------------------------------------------------------------------------|-----------------------------------------------------------------------------------------------------------------------------------------------|---------------------------------------------------------------------------------------------------------------------------------------------------------------------------------------------------------------------------------------------------------------------------------------------------------------------------------------------------------------------------------------------------------------------------------------------------------------------------------------------------------------------------------------------------------------------------------------------------------------------------------------------------------------------------------------------------------------------------------------------------------------------------------------------------------------------------------------------------------------------------------------------------------------------------------------------------------------------------------------------------------------------------------------------------------------------------------------------------------------------------------------------------------------------------------------------------------------------------------------------------------------------------------------------------------------------------------------------------------------------------------------------------------------------------------------------------------------------------------------------------------------------------------------------------------------------------------------------------------------------------------------------------------------------|------------------------------------------------------------------|--|--|--|--|---------|---------|---------|---------|---------|-----------------------------------------------------------------------------------------------------------------------------------------------------------------------------------------------------------------|-----------------------------------------------------------------------------------------------------------------------------------------------------------------------------------------------------------------------------------------------------------------------------|-----------------------------------------------------------------------------------------------------------------------------------------------------------------------------------------------------------------------------------------------|-----------------------------------------------------------------------------------------------------------------------------------------------------------------------------------------------------------------------------------------------------------------------------------------------------------------|--------------------------------------------------------------------------------------------------------------------------------------------------------------------------------------------------------------------------------------------------------------------------|
| Systems-based Practice 1: Coordination of patient care within the health care system                                                                                                                                                                                                                                                                                                                                                                                                                                                  |                                                                                                                                                                                                                                                                                                                                                                                                                            |                                                                                                                                                                                                                                                                                                                                                                                                                                                                                                                                                                                                                                                                                                                                                                                                                                                                                                                                                                                                                                                                                                                                                                                                                                                                                                                                                                                                                                                                                                                                                                                                                                                                                                                                                                                                                                                                                                                                                                                                                                                                                                                                                                                                                                                                                                                                                                                                                                                                                                                                                                                             |                                                                                                                                                                                                                                                                                                                                                                                                                                         |                                                                                                                                                                                                                                                                                                                                                                        |                                                                                                                                                                                                                                                                                                                                                                                                                                                                                                                                             |  |  |                                                                                                                                                                                                                                                                                                                                                                                                                                                                                                                                       |                          |         |         |         |         |         |         |                                                                                                                                                                                                                                                                                                                                                                                                                            |                                                                                                                                                                                                                                                                                                                                                                                                                                                               |                                                                                                                                                                                                                                                                                                                                                                                                                                         |                                                                                                                                                                                                                                                                                                                                                                        |                                                                                                                                                                                                                                                                                                                                                                                                                                                                                                                                             |                                                                                                                                               |                                                                                                                                                                                                                                                                                                                                                                                                                                                                                                                                                                                                                                                                                                                                                                                                                                                                                                                                                                                                                                                                                                                                                                                                                                                                                                                                                                                                                                                                                                                                                                                                                                                                     |                                                                  |  |  |  |  |         |         |         |         |         |                                                                                                                                                                                                                 |                                                                                                                                                                                                                                                                             |                                                                                                                                                                                                                                               |                                                                                                                                                                                                                                                                                                                 |                                                                                                                                                                                                                                                                          |
| Has not Achieved Level 1                                                                                                                                                                                                                                                                                                                                                                                                                                                                                                              | Level 1                                                                                                                                                                                                                                                                                                                                                                                                                    | Level 2                                                                                                                                                                                                                                                                                                                                                                                                                                                                                                                                                                                                                                                                                                                                                                                                                                                                                                                                                                                                                                                                                                                                                                                                                                                                                                                                                                                                                                                                                                                                                                                                                                                                                                                                                                                                                                                                                                                                                                                                                                                                                                                                                                                                                                                                                                                                                                                                                                                                                                                                                                                     | Level 3                                                                                                                                                                                                                                                                                                                                                                                                                                 | Level 4                                                                                                                                                                                                                                                                                                                                                                | Level 5                                                                                                                                                                                                                                                                                                                                                                                                                                                                                                                                     |  |  |                                                                                                                                                                                                                                                                                                                                                                                                                                                                                                                                       |                          |         |         |         |         |         |         |                                                                                                                                                                                                                                                                                                                                                                                                                            |                                                                                                                                                                                                                                                                                                                                                                                                                                                               |                                                                                                                                                                                                                                                                                                                                                                                                                                         |                                                                                                                                                                                                                                                                                                                                                                        |                                                                                                                                                                                                                                                                                                                                                                                                                                                                                                                                             |                                                                                                                                               |                                                                                                                                                                                                                                                                                                                                                                                                                                                                                                                                                                                                                                                                                                                                                                                                                                                                                                                                                                                                                                                                                                                                                                                                                                                                                                                                                                                                                                                                                                                                                                                                                                                                     |                                                                  |  |  |  |  |         |         |         |         |         |                                                                                                                                                                                                                 |                                                                                                                                                                                                                                                                             |                                                                                                                                                                                                                                               |                                                                                                                                                                                                                                                                                                                 |                                                                                                                                                                                                                                                                          |
|                                                                                                                                                                                                                                                                                                                                                                                                                                                                                                                                       | <p>Identifies the roles of patients, families, health care providers, and systems in health care delivery and outcome</p> <p>Identifies priorities when caring for multiple patients</p> <p>Coordinates the care of an individual patient within the health care system effectively and safely</p>                                                                                                                         | <p>Prioritizes multiple patient care activities with indirect supervision for routine procedures</p> <p>Uses system resources to facilitate cost-effective and safe non-subspecialty anesthesia care</p>                                                                                                                                                                                                                                                                                                                                                                                                                                                                                                                                                                                                                                                                                                                                                                                                                                                                                                                                                                                                                                                                                                                                                                                                                                                                                                                                                                                                                                                                                                                                                                                                                                                                                                                                                                                                                                                                                                                                                                                                                                                                                                                                                                                                                                                                                                                                                                                    | <p>Prioritizes multiple patient care activities with indirect supervision for patients undergoing common subspecialty procedures</p> <p>Uses system resources to facilitate cost-effective and safe subspecialty anesthesia care</p>                                                                                                                                                                                                    | <p>Manages multiple patient care activities with conditional independence</p> <p>Uses system resources to facilitate and optimize cost-effective and safe longitudinal peri-operative care</p>                                                                                                                                                                         | <p>Effectively coordinates the management of multiple patient care activities</p>                                                                                                                                                                                                                                                                                                                                                                                                                                                           |  |  |                                                                                                                                                                                                                                                                                                                                                                                                                                                                                                                                       |                          |         |         |         |         |         |         |                                                                                                                                                                                                                                                                                                                                                                                                                            |                                                                                                                                                                                                                                                                                                                                                                                                                                                               |                                                                                                                                                                                                                                                                                                                                                                                                                                         |                                                                                                                                                                                                                                                                                                                                                                        |                                                                                                                                                                                                                                                                                                                                                                                                                                                                                                                                             |                                                                                                                                               |                                                                                                                                                                                                                                                                                                                                                                                                                                                                                                                                                                                                                                                                                                                                                                                                                                                                                                                                                                                                                                                                                                                                                                                                                                                                                                                                                                                                                                                                                                                                                                                                                                                                     |                                                                  |  |  |  |  |         |         |         |         |         |                                                                                                                                                                                                                 |                                                                                                                                                                                                                                                                             |                                                                                                                                                                                                                                               |                                                                                                                                                                                                                                                                                                                 |                                                                                                                                                                                                                                                                          |
| <p><b>Anesthesiology</b></p>                                                                                                                                                                                                                                                                                                                                                                                                                                                                                                          | <p>QI<br/>PS</p>                                                                                                                                                                                                                                                                                                                                                                                                           | <table border="1"> <thead> <tr> <th colspan="6">Systems-based Practice 2: Patient Safety and Quality Improvement</th> </tr> <tr> <th>Has not Achieved Level 1</th> <th>Level 1</th> <th>Level 2</th> <th>Level 3</th> <th>Level 4</th> <th>Level 5</th> </tr> </thead> <tbody> <tr> <td></td> <td> <p>Describes common causes of errors</p> <p>Describes team-based actions and techniques designed to enhance patient safety</p> <p>Participates in established institutional safety initiatives</p> <p>Follows institutional safety policies, including reporting of problematic behaviors or processes, errors, near misses, and complications</p> <p>Incorporates national standards and guidelines into patient care</p> </td> <td> <p>Uses the safety features of medical devices</p> <p>Participates in team-based actions designed to enhance patient safety, (e.g., briefings, closed-loop communication)</p> <p>Identifies problems in the quality of health care delivery within one's institution and brings this to the attention of supervisors</p> <p>Incorporates anesthesiology-specific national standards and guidelines into patient care</p> </td> <td> <p>Describes and participates in systems and procedures that promote patient safety</p> <p>Identifies departmental and/or institutional opportunities to improve quality of care</p> <p>Participates in quality improvement activities as a member of an inter-professional team to improve patient outcomes</p> <p>Takes patient preferences into consideration while promoting cost-effective patient care that improves outcomes</p> </td> <td> <p>Applies advanced team techniques designed to enhance patient safety (e.g., 'assertiveness')</p> <p>Participates in formal analysis (e.g., root cause analysis, failure mode effects analysis) of medical error and sentinel events with direct supervision</p> <p>Identifies opportunities in the continuum of care to improve patient outcome and reduce costs</p> </td> <td> <p>Leads multidisciplinary teams (e.g., human factors engineers, social scientists) to address patient safety issues</p> <p>Provides consultation to organizations to improve personal and patient safety</p> <p>Proactively participates in educational sessions prior to using new advanced medical devices for patient care</p> <p>Defines and constructs process and outcome measures, and leads quality improvement projects</p> <p>Effectively addresses areas in anesthesiology practice that pose potential dangers to patients</p> </td> </tr> </tbody> </table> | Systems-based Practice 2: Patient Safety and Quality Improvement                                                                                                                                                                                                                                                                                                                                                                        |                                                                                                                                                                                                                                                                                                                                                                        |                                                                                                                                                                                                                                                                                                                                                                                                                                                                                                                                             |  |  |                                                                                                                                                                                                                                                                                                                                                                                                                                                                                                                                       | Has not Achieved Level 1 | Level 1 | Level 2 | Level 3 | Level 4 | Level 5 |         | <p>Describes common causes of errors</p> <p>Describes team-based actions and techniques designed to enhance patient safety</p> <p>Participates in established institutional safety initiatives</p> <p>Follows institutional safety policies, including reporting of problematic behaviors or processes, errors, near misses, and complications</p> <p>Incorporates national standards and guidelines into patient care</p> | <p>Uses the safety features of medical devices</p> <p>Participates in team-based actions designed to enhance patient safety, (e.g., briefings, closed-loop communication)</p> <p>Identifies problems in the quality of health care delivery within one's institution and brings this to the attention of supervisors</p> <p>Incorporates anesthesiology-specific national standards and guidelines into patient care</p>                                      | <p>Describes and participates in systems and procedures that promote patient safety</p> <p>Identifies departmental and/or institutional opportunities to improve quality of care</p> <p>Participates in quality improvement activities as a member of an inter-professional team to improve patient outcomes</p> <p>Takes patient preferences into consideration while promoting cost-effective patient care that improves outcomes</p> | <p>Applies advanced team techniques designed to enhance patient safety (e.g., 'assertiveness')</p> <p>Participates in formal analysis (e.g., root cause analysis, failure mode effects analysis) of medical error and sentinel events with direct supervision</p> <p>Identifies opportunities in the continuum of care to improve patient outcome and reduce costs</p> | <p>Leads multidisciplinary teams (e.g., human factors engineers, social scientists) to address patient safety issues</p> <p>Provides consultation to organizations to improve personal and patient safety</p> <p>Proactively participates in educational sessions prior to using new advanced medical devices for patient care</p> <p>Defines and constructs process and outcome measures, and leads quality improvement projects</p> <p>Effectively addresses areas in anesthesiology practice that pose potential dangers to patients</p> |                                                                                                                                               |                                                                                                                                                                                                                                                                                                                                                                                                                                                                                                                                                                                                                                                                                                                                                                                                                                                                                                                                                                                                                                                                                                                                                                                                                                                                                                                                                                                                                                                                                                                                                                                                                                                                     |                                                                  |  |  |  |  |         |         |         |         |         |                                                                                                                                                                                                                 |                                                                                                                                                                                                                                                                             |                                                                                                                                                                                                                                               |                                                                                                                                                                                                                                                                                                                 |                                                                                                                                                                                                                                                                          |
| Systems-based Practice 2: Patient Safety and Quality Improvement                                                                                                                                                                                                                                                                                                                                                                                                                                                                      |                                                                                                                                                                                                                                                                                                                                                                                                                            |                                                                                                                                                                                                                                                                                                                                                                                                                                                                                                                                                                                                                                                                                                                                                                                                                                                                                                                                                                                                                                                                                                                                                                                                                                                                                                                                                                                                                                                                                                                                                                                                                                                                                                                                                                                                                                                                                                                                                                                                                                                                                                                                                                                                                                                                                                                                                                                                                                                                                                                                                                                             |                                                                                                                                                                                                                                                                                                                                                                                                                                         |                                                                                                                                                                                                                                                                                                                                                                        |                                                                                                                                                                                                                                                                                                                                                                                                                                                                                                                                             |  |  |                                                                                                                                                                                                                                                                                                                                                                                                                                                                                                                                       |                          |         |         |         |         |         |         |                                                                                                                                                                                                                                                                                                                                                                                                                            |                                                                                                                                                                                                                                                                                                                                                                                                                                                               |                                                                                                                                                                                                                                                                                                                                                                                                                                         |                                                                                                                                                                                                                                                                                                                                                                        |                                                                                                                                                                                                                                                                                                                                                                                                                                                                                                                                             |                                                                                                                                               |                                                                                                                                                                                                                                                                                                                                                                                                                                                                                                                                                                                                                                                                                                                                                                                                                                                                                                                                                                                                                                                                                                                                                                                                                                                                                                                                                                                                                                                                                                                                                                                                                                                                     |                                                                  |  |  |  |  |         |         |         |         |         |                                                                                                                                                                                                                 |                                                                                                                                                                                                                                                                             |                                                                                                                                                                                                                                               |                                                                                                                                                                                                                                                                                                                 |                                                                                                                                                                                                                                                                          |
| Has not Achieved Level 1                                                                                                                                                                                                                                                                                                                                                                                                                                                                                                              | Level 1                                                                                                                                                                                                                                                                                                                                                                                                                    | Level 2                                                                                                                                                                                                                                                                                                                                                                                                                                                                                                                                                                                                                                                                                                                                                                                                                                                                                                                                                                                                                                                                                                                                                                                                                                                                                                                                                                                                                                                                                                                                                                                                                                                                                                                                                                                                                                                                                                                                                                                                                                                                                                                                                                                                                                                                                                                                                                                                                                                                                                                                                                                     | Level 3                                                                                                                                                                                                                                                                                                                                                                                                                                 | Level 4                                                                                                                                                                                                                                                                                                                                                                | Level 5                                                                                                                                                                                                                                                                                                                                                                                                                                                                                                                                     |  |  |                                                                                                                                                                                                                                                                                                                                                                                                                                                                                                                                       |                          |         |         |         |         |         |         |                                                                                                                                                                                                                                                                                                                                                                                                                            |                                                                                                                                                                                                                                                                                                                                                                                                                                                               |                                                                                                                                                                                                                                                                                                                                                                                                                                         |                                                                                                                                                                                                                                                                                                                                                                        |                                                                                                                                                                                                                                                                                                                                                                                                                                                                                                                                             |                                                                                                                                               |                                                                                                                                                                                                                                                                                                                                                                                                                                                                                                                                                                                                                                                                                                                                                                                                                                                                                                                                                                                                                                                                                                                                                                                                                                                                                                                                                                                                                                                                                                                                                                                                                                                                     |                                                                  |  |  |  |  |         |         |         |         |         |                                                                                                                                                                                                                 |                                                                                                                                                                                                                                                                             |                                                                                                                                                                                                                                               |                                                                                                                                                                                                                                                                                                                 |                                                                                                                                                                                                                                                                          |
|                                                                                                                                                                                                                                                                                                                                                                                                                                                                                                                                       | <p>Describes common causes of errors</p> <p>Describes team-based actions and techniques designed to enhance patient safety</p> <p>Participates in established institutional safety initiatives</p> <p>Follows institutional safety policies, including reporting of problematic behaviors or processes, errors, near misses, and complications</p> <p>Incorporates national standards and guidelines into patient care</p> | <p>Uses the safety features of medical devices</p> <p>Participates in team-based actions designed to enhance patient safety, (e.g., briefings, closed-loop communication)</p> <p>Identifies problems in the quality of health care delivery within one's institution and brings this to the attention of supervisors</p> <p>Incorporates anesthesiology-specific national standards and guidelines into patient care</p>                                                                                                                                                                                                                                                                                                                                                                                                                                                                                                                                                                                                                                                                                                                                                                                                                                                                                                                                                                                                                                                                                                                                                                                                                                                                                                                                                                                                                                                                                                                                                                                                                                                                                                                                                                                                                                                                                                                                                                                                                                                                                                                                                                    | <p>Describes and participates in systems and procedures that promote patient safety</p> <p>Identifies departmental and/or institutional opportunities to improve quality of care</p> <p>Participates in quality improvement activities as a member of an inter-professional team to improve patient outcomes</p> <p>Takes patient preferences into consideration while promoting cost-effective patient care that improves outcomes</p> | <p>Applies advanced team techniques designed to enhance patient safety (e.g., 'assertiveness')</p> <p>Participates in formal analysis (e.g., root cause analysis, failure mode effects analysis) of medical error and sentinel events with direct supervision</p> <p>Identifies opportunities in the continuum of care to improve patient outcome and reduce costs</p> | <p>Leads multidisciplinary teams (e.g., human factors engineers, social scientists) to address patient safety issues</p> <p>Provides consultation to organizations to improve personal and patient safety</p> <p>Proactively participates in educational sessions prior to using new advanced medical devices for patient care</p> <p>Defines and constructs process and outcome measures, and leads quality improvement projects</p> <p>Effectively addresses areas in anesthesiology practice that pose potential dangers to patients</p> |  |  |                                                                                                                                                                                                                                                                                                                                                                                                                                                                                                                                       |                          |         |         |         |         |         |         |                                                                                                                                                                                                                                                                                                                                                                                                                            |                                                                                                                                                                                                                                                                                                                                                                                                                                                               |                                                                                                                                                                                                                                                                                                                                                                                                                                         |                                                                                                                                                                                                                                                                                                                                                                        |                                                                                                                                                                                                                                                                                                                                                                                                                                                                                                                                             |                                                                                                                                               |                                                                                                                                                                                                                                                                                                                                                                                                                                                                                                                                                                                                                                                                                                                                                                                                                                                                                                                                                                                                                                                                                                                                                                                                                                                                                                                                                                                                                                                                                                                                                                                                                                                                     |                                                                  |  |  |  |  |         |         |         |         |         |                                                                                                                                                                                                                 |                                                                                                                                                                                                                                                                             |                                                                                                                                                                                                                                               |                                                                                                                                                                                                                                                                                                                 |                                                                                                                                                                                                                                                                          |
| <p><b>Colon and Rectal Surgery</b></p>                                                                                                                                                                                                                                                                                                                                                                                                                                                                                                | <p>Resources<br/>PS<br/>Technology</p>                                                                                                                                                                                                                                                                                                                                                                                     | <table border="1"> <thead> <tr> <th colspan="5">Systems-based Practice –</th> </tr> <tr> <th colspan="5"> <ul style="list-style-type: none"> <li>Utilizes/accesses outside resources</li> <li>Demonstrates awareness of and accommodation to circumstances affecting patient care, including the patient's financial resources and other factors that can affect health care delivery and quality</li> <li>Understands the basics of patient safety and clinical risk management, with emphasis on avoidance of medical errors</li> <li>Uses technology and external resources to accomplish safe and effective health care delivery</li> </ul> </th> </tr> <tr> <th>Level 1</th> <th>Level 2</th> <th>Level 3</th> <th>Level 4</th> <th>Level 5</th> </tr> </thead> <tbody> <tr> <td> <ul style="list-style-type: none"> <li>Rarely demonstrates proficiency in systems-based practice</li> </ul> </td> <td> <ul style="list-style-type: none"> <li>Occasionally demonstrates proficiency in systems-based practice</li> </ul> </td> <td> <ul style="list-style-type: none"> <li>Consistently demonstrates proficiency in systems-based practice in common clinical situations</li> </ul> </td> <td> <ul style="list-style-type: none"> <li>Consistently demonstrates proficiency in systems-based practice in most clinical situations</li> </ul> </td> <td> <ul style="list-style-type: none"> <li>Is a leader in the area of systems-based practice; advice is frequently sought relating to difficult situations</li> </ul> </td> </tr> </tbody> </table>                                                                                                                                                                                                                                                                                                                                                                                                                                                                                                                                                                                                                                                                                                                                                                                                                                                                                                                                                                                                                              | Systems-based Practice –                                                                                                                                                                                                                                                                                                                                                                                                                |                                                                                                                                                                                                                                                                                                                                                                        |                                                                                                                                                                                                                                                                                                                                                                                                                                                                                                                                             |  |  | <ul style="list-style-type: none"> <li>Utilizes/accesses outside resources</li> <li>Demonstrates awareness of and accommodation to circumstances affecting patient care, including the patient's financial resources and other factors that can affect health care delivery and quality</li> <li>Understands the basics of patient safety and clinical risk management, with emphasis on avoidance of medical errors</li> <li>Uses technology and external resources to accomplish safe and effective health care delivery</li> </ul> |                          |         |         |         | Level 1 | Level 2 | Level 3 | Level 4                                                                                                                                                                                                                                                                                                                                                                                                                    | Level 5                                                                                                                                                                                                                                                                                                                                                                                                                                                       | <ul style="list-style-type: none"> <li>Rarely demonstrates proficiency in systems-based practice</li> </ul>                                                                                                                                                                                                                                                                                                                             | <ul style="list-style-type: none"> <li>Occasionally demonstrates proficiency in systems-based practice</li> </ul>                                                                                                                                                                                                                                                      | <ul style="list-style-type: none"> <li>Consistently demonstrates proficiency in systems-based practice in common clinical situations</li> </ul>                                                                                                                                                                                                                                                                                                                                                                                             | <ul style="list-style-type: none"> <li>Consistently demonstrates proficiency in systems-based practice in most clinical situations</li> </ul> | <ul style="list-style-type: none"> <li>Is a leader in the area of systems-based practice; advice is frequently sought relating to difficult situations</li> </ul>                                                                                                                                                                                                                                                                                                                                                                                                                                                                                                                                                                                                                                                                                                                                                                                                                                                                                                                                                                                                                                                                                                                                                                                                                                                                                                                                                                                                                                                                                                   |                                                                  |  |  |  |  |         |         |         |         |         |                                                                                                                                                                                                                 |                                                                                                                                                                                                                                                                             |                                                                                                                                                                                                                                               |                                                                                                                                                                                                                                                                                                                 |                                                                                                                                                                                                                                                                          |
| Systems-based Practice –                                                                                                                                                                                                                                                                                                                                                                                                                                                                                                              |                                                                                                                                                                                                                                                                                                                                                                                                                            |                                                                                                                                                                                                                                                                                                                                                                                                                                                                                                                                                                                                                                                                                                                                                                                                                                                                                                                                                                                                                                                                                                                                                                                                                                                                                                                                                                                                                                                                                                                                                                                                                                                                                                                                                                                                                                                                                                                                                                                                                                                                                                                                                                                                                                                                                                                                                                                                                                                                                                                                                                                             |                                                                                                                                                                                                                                                                                                                                                                                                                                         |                                                                                                                                                                                                                                                                                                                                                                        |                                                                                                                                                                                                                                                                                                                                                                                                                                                                                                                                             |  |  |                                                                                                                                                                                                                                                                                                                                                                                                                                                                                                                                       |                          |         |         |         |         |         |         |                                                                                                                                                                                                                                                                                                                                                                                                                            |                                                                                                                                                                                                                                                                                                                                                                                                                                                               |                                                                                                                                                                                                                                                                                                                                                                                                                                         |                                                                                                                                                                                                                                                                                                                                                                        |                                                                                                                                                                                                                                                                                                                                                                                                                                                                                                                                             |                                                                                                                                               |                                                                                                                                                                                                                                                                                                                                                                                                                                                                                                                                                                                                                                                                                                                                                                                                                                                                                                                                                                                                                                                                                                                                                                                                                                                                                                                                                                                                                                                                                                                                                                                                                                                                     |                                                                  |  |  |  |  |         |         |         |         |         |                                                                                                                                                                                                                 |                                                                                                                                                                                                                                                                             |                                                                                                                                                                                                                                               |                                                                                                                                                                                                                                                                                                                 |                                                                                                                                                                                                                                                                          |
| <ul style="list-style-type: none"> <li>Utilizes/accesses outside resources</li> <li>Demonstrates awareness of and accommodation to circumstances affecting patient care, including the patient's financial resources and other factors that can affect health care delivery and quality</li> <li>Understands the basics of patient safety and clinical risk management, with emphasis on avoidance of medical errors</li> <li>Uses technology and external resources to accomplish safe and effective health care delivery</li> </ul> |                                                                                                                                                                                                                                                                                                                                                                                                                            |                                                                                                                                                                                                                                                                                                                                                                                                                                                                                                                                                                                                                                                                                                                                                                                                                                                                                                                                                                                                                                                                                                                                                                                                                                                                                                                                                                                                                                                                                                                                                                                                                                                                                                                                                                                                                                                                                                                                                                                                                                                                                                                                                                                                                                                                                                                                                                                                                                                                                                                                                                                             |                                                                                                                                                                                                                                                                                                                                                                                                                                         |                                                                                                                                                                                                                                                                                                                                                                        |                                                                                                                                                                                                                                                                                                                                                                                                                                                                                                                                             |  |  |                                                                                                                                                                                                                                                                                                                                                                                                                                                                                                                                       |                          |         |         |         |         |         |         |                                                                                                                                                                                                                                                                                                                                                                                                                            |                                                                                                                                                                                                                                                                                                                                                                                                                                                               |                                                                                                                                                                                                                                                                                                                                                                                                                                         |                                                                                                                                                                                                                                                                                                                                                                        |                                                                                                                                                                                                                                                                                                                                                                                                                                                                                                                                             |                                                                                                                                               |                                                                                                                                                                                                                                                                                                                                                                                                                                                                                                                                                                                                                                                                                                                                                                                                                                                                                                                                                                                                                                                                                                                                                                                                                                                                                                                                                                                                                                                                                                                                                                                                                                                                     |                                                                  |  |  |  |  |         |         |         |         |         |                                                                                                                                                                                                                 |                                                                                                                                                                                                                                                                             |                                                                                                                                                                                                                                               |                                                                                                                                                                                                                                                                                                                 |                                                                                                                                                                                                                                                                          |
| Level 1                                                                                                                                                                                                                                                                                                                                                                                                                                                                                                                               | Level 2                                                                                                                                                                                                                                                                                                                                                                                                                    | Level 3                                                                                                                                                                                                                                                                                                                                                                                                                                                                                                                                                                                                                                                                                                                                                                                                                                                                                                                                                                                                                                                                                                                                                                                                                                                                                                                                                                                                                                                                                                                                                                                                                                                                                                                                                                                                                                                                                                                                                                                                                                                                                                                                                                                                                                                                                                                                                                                                                                                                                                                                                                                     | Level 4                                                                                                                                                                                                                                                                                                                                                                                                                                 | Level 5                                                                                                                                                                                                                                                                                                                                                                |                                                                                                                                                                                                                                                                                                                                                                                                                                                                                                                                             |  |  |                                                                                                                                                                                                                                                                                                                                                                                                                                                                                                                                       |                          |         |         |         |         |         |         |                                                                                                                                                                                                                                                                                                                                                                                                                            |                                                                                                                                                                                                                                                                                                                                                                                                                                                               |                                                                                                                                                                                                                                                                                                                                                                                                                                         |                                                                                                                                                                                                                                                                                                                                                                        |                                                                                                                                                                                                                                                                                                                                                                                                                                                                                                                                             |                                                                                                                                               |                                                                                                                                                                                                                                                                                                                                                                                                                                                                                                                                                                                                                                                                                                                                                                                                                                                                                                                                                                                                                                                                                                                                                                                                                                                                                                                                                                                                                                                                                                                                                                                                                                                                     |                                                                  |  |  |  |  |         |         |         |         |         |                                                                                                                                                                                                                 |                                                                                                                                                                                                                                                                             |                                                                                                                                                                                                                                               |                                                                                                                                                                                                                                                                                                                 |                                                                                                                                                                                                                                                                          |
| <ul style="list-style-type: none"> <li>Rarely demonstrates proficiency in systems-based practice</li> </ul>                                                                                                                                                                                                                                                                                                                                                                                                                           | <ul style="list-style-type: none"> <li>Occasionally demonstrates proficiency in systems-based practice</li> </ul>                                                                                                                                                                                                                                                                                                          | <ul style="list-style-type: none"> <li>Consistently demonstrates proficiency in systems-based practice in common clinical situations</li> </ul>                                                                                                                                                                                                                                                                                                                                                                                                                                                                                                                                                                                                                                                                                                                                                                                                                                                                                                                                                                                                                                                                                                                                                                                                                                                                                                                                                                                                                                                                                                                                                                                                                                                                                                                                                                                                                                                                                                                                                                                                                                                                                                                                                                                                                                                                                                                                                                                                                                             | <ul style="list-style-type: none"> <li>Consistently demonstrates proficiency in systems-based practice in most clinical situations</li> </ul>                                                                                                                                                                                                                                                                                           | <ul style="list-style-type: none"> <li>Is a leader in the area of systems-based practice; advice is frequently sought relating to difficult situations</li> </ul>                                                                                                                                                                                                      |                                                                                                                                                                                                                                                                                                                                                                                                                                                                                                                                             |  |  |                                                                                                                                                                                                                                                                                                                                                                                                                                                                                                                                       |                          |         |         |         |         |         |         |                                                                                                                                                                                                                                                                                                                                                                                                                            |                                                                                                                                                                                                                                                                                                                                                                                                                                                               |                                                                                                                                                                                                                                                                                                                                                                                                                                         |                                                                                                                                                                                                                                                                                                                                                                        |                                                                                                                                                                                                                                                                                                                                                                                                                                                                                                                                             |                                                                                                                                               |                                                                                                                                                                                                                                                                                                                                                                                                                                                                                                                                                                                                                                                                                                                                                                                                                                                                                                                                                                                                                                                                                                                                                                                                                                                                                                                                                                                                                                                                                                                                                                                                                                                                     |                                                                  |  |  |  |  |         |         |         |         |         |                                                                                                                                                                                                                 |                                                                                                                                                                                                                                                                             |                                                                                                                                                                                                                                               |                                                                                                                                                                                                                                                                                                                 |                                                                                                                                                                                                                                                                          |
| <p><b>Dermatology</b></p>                                                                                                                                                                                                                                                                                                                                                                                                                                                                                                             | <p>HC<br/>Systems</p>                                                                                                                                                                                                                                                                                                                                                                                                      | <table border="1"> <thead> <tr> <th colspan="6">SBP1. Adapts easily and works effectively in various health care delivery settings and systems</th> </tr> <tr> <th>Has not Achieved Level 1</th> <th>Level 1</th> <th>Level 2</th> <th>Level 3</th> <th>Level 4</th> <th>Level 5</th> </tr> </thead> <tbody> <tr> <td></td> <td> <p>Completes all required tasks for residency and first rotation site orientation</p> <p>Articulates health care missions at participating sites</p> </td> <td> <p>Uses electronic health record (EHR) efficiently and independently</p> <p>Adapts to clinical work in different sites and health care systems (e.g., VA, university medical center)</p> <p>Maintains access to all needed systems</p> <p>Identifies target patient populations, and the differences in demographics and needs of these populations at each participating site</p> <p>Accesses support services appropriately at different practice sites</p> </td> <td> <p>Effectively navigates systems to overcome obstacles to optimal patient care (e.g., facilitating access to care)</p> <p>Identifies target patient populations, differences in demographics, and can use the appropriate agencies/resources to address specific needs of these populations</p> </td> <td> <p>Recognizes the differences between a system change and a work-around (a bypass of a recognized system fault that attempts to improve efficiency)</p> <p>Identifies at least one work-around, explores opportunities for change, and when possible, takes steps to improve the system fault that incited it</p> </td> <td> <p>Adapts learning from one system or setting to another, and in this way, can effect or stimulate improvements in a system, and does so when the need arises</p> </td> </tr> </tbody> </table>                                                                                                                                                                                                                                                                                                                                                                                                                                                                                                                                                                                                                                                                                                                                                                           | SBP1. Adapts easily and works effectively in various health care delivery settings and systems                                                                                                                                                                                                                                                                                                                                          |                                                                                                                                                                                                                                                                                                                                                                        |                                                                                                                                                                                                                                                                                                                                                                                                                                                                                                                                             |  |  |                                                                                                                                                                                                                                                                                                                                                                                                                                                                                                                                       | Has not Achieved Level 1 | Level 1 | Level 2 | Level 3 | Level 4 | Level 5 |         | <p>Completes all required tasks for residency and first rotation site orientation</p> <p>Articulates health care missions at participating sites</p>                                                                                                                                                                                                                                                                       | <p>Uses electronic health record (EHR) efficiently and independently</p> <p>Adapts to clinical work in different sites and health care systems (e.g., VA, university medical center)</p> <p>Maintains access to all needed systems</p> <p>Identifies target patient populations, and the differences in demographics and needs of these populations at each participating site</p> <p>Accesses support services appropriately at different practice sites</p> | <p>Effectively navigates systems to overcome obstacles to optimal patient care (e.g., facilitating access to care)</p> <p>Identifies target patient populations, differences in demographics, and can use the appropriate agencies/resources to address specific needs of these populations</p>                                                                                                                                         | <p>Recognizes the differences between a system change and a work-around (a bypass of a recognized system fault that attempts to improve efficiency)</p> <p>Identifies at least one work-around, explores opportunities for change, and when possible, takes steps to improve the system fault that incited it</p>                                                      | <p>Adapts learning from one system or setting to another, and in this way, can effect or stimulate improvements in a system, and does so when the need arises</p>                                                                                                                                                                                                                                                                                                                                                                           | <p>PS<br/>QI</p>                                                                                                                              | <table border="1"> <thead> <tr> <th colspan="5">Systems-Based Practice 1: Patient Safety and Quality Improvement</th> </tr> <tr> <th>Level 1</th> <th>Level 2</th> <th>Level 3</th> <th>Level 4</th> <th>Level 5</th> </tr> </thead> <tbody> <tr> <td> <p>Demonstrates knowledge of common safety events</p> <p>Demonstrates knowledge of how to report patient safety events</p> <p>Demonstrates knowledge of basic quality improvement methodologies and metrics</p> </td> <td> <p>Identifies system factors that lead to safety events</p> <p>Reports patient safety events through institutional reporting systems</p> <p>Describes local quality improvement initiatives (e.g., handwashing, needle stick prevention, wrong site surgery prevention)</p> </td> <td> <p>Participates in analysis of safety events (simulated or actual)</p> <p>Participates in disclosure of patient safety events to patients and families (simulated or actual)</p> <p>Participates in local quality improvement initiatives</p> </td> <td> <p>Conducts analysis of safety events and offers error prevention strategies (simulated or actual)</p> <p>Discloses patient safety events to patients and families (simulated or actual)</p> <p>Demonstrates the skills required to identify, develop, implement, and analyze a quality improvement project</p> </td> <td> <p>Actively engages teams and processes to modify systems to prevent safety events</p> <p>Mentors others in the disclosure of patient safety events</p> <p>Creates, implements, and assesses quality improvement initiatives at the institutional or community level</p> </td> </tr> </tbody> </table> | Systems-Based Practice 1: Patient Safety and Quality Improvement |  |  |  |  | Level 1 | Level 2 | Level 3 | Level 4 | Level 5 | <p>Demonstrates knowledge of common safety events</p> <p>Demonstrates knowledge of how to report patient safety events</p> <p>Demonstrates knowledge of basic quality improvement methodologies and metrics</p> | <p>Identifies system factors that lead to safety events</p> <p>Reports patient safety events through institutional reporting systems</p> <p>Describes local quality improvement initiatives (e.g., handwashing, needle stick prevention, wrong site surgery prevention)</p> | <p>Participates in analysis of safety events (simulated or actual)</p> <p>Participates in disclosure of patient safety events to patients and families (simulated or actual)</p> <p>Participates in local quality improvement initiatives</p> | <p>Conducts analysis of safety events and offers error prevention strategies (simulated or actual)</p> <p>Discloses patient safety events to patients and families (simulated or actual)</p> <p>Demonstrates the skills required to identify, develop, implement, and analyze a quality improvement project</p> | <p>Actively engages teams and processes to modify systems to prevent safety events</p> <p>Mentors others in the disclosure of patient safety events</p> <p>Creates, implements, and assesses quality improvement initiatives at the institutional or community level</p> |
| SBP1. Adapts easily and works effectively in various health care delivery settings and systems                                                                                                                                                                                                                                                                                                                                                                                                                                        |                                                                                                                                                                                                                                                                                                                                                                                                                            |                                                                                                                                                                                                                                                                                                                                                                                                                                                                                                                                                                                                                                                                                                                                                                                                                                                                                                                                                                                                                                                                                                                                                                                                                                                                                                                                                                                                                                                                                                                                                                                                                                                                                                                                                                                                                                                                                                                                                                                                                                                                                                                                                                                                                                                                                                                                                                                                                                                                                                                                                                                             |                                                                                                                                                                                                                                                                                                                                                                                                                                         |                                                                                                                                                                                                                                                                                                                                                                        |                                                                                                                                                                                                                                                                                                                                                                                                                                                                                                                                             |  |  |                                                                                                                                                                                                                                                                                                                                                                                                                                                                                                                                       |                          |         |         |         |         |         |         |                                                                                                                                                                                                                                                                                                                                                                                                                            |                                                                                                                                                                                                                                                                                                                                                                                                                                                               |                                                                                                                                                                                                                                                                                                                                                                                                                                         |                                                                                                                                                                                                                                                                                                                                                                        |                                                                                                                                                                                                                                                                                                                                                                                                                                                                                                                                             |                                                                                                                                               |                                                                                                                                                                                                                                                                                                                                                                                                                                                                                                                                                                                                                                                                                                                                                                                                                                                                                                                                                                                                                                                                                                                                                                                                                                                                                                                                                                                                                                                                                                                                                                                                                                                                     |                                                                  |  |  |  |  |         |         |         |         |         |                                                                                                                                                                                                                 |                                                                                                                                                                                                                                                                             |                                                                                                                                                                                                                                               |                                                                                                                                                                                                                                                                                                                 |                                                                                                                                                                                                                                                                          |
| Has not Achieved Level 1                                                                                                                                                                                                                                                                                                                                                                                                                                                                                                              | Level 1                                                                                                                                                                                                                                                                                                                                                                                                                    | Level 2                                                                                                                                                                                                                                                                                                                                                                                                                                                                                                                                                                                                                                                                                                                                                                                                                                                                                                                                                                                                                                                                                                                                                                                                                                                                                                                                                                                                                                                                                                                                                                                                                                                                                                                                                                                                                                                                                                                                                                                                                                                                                                                                                                                                                                                                                                                                                                                                                                                                                                                                                                                     | Level 3                                                                                                                                                                                                                                                                                                                                                                                                                                 | Level 4                                                                                                                                                                                                                                                                                                                                                                | Level 5                                                                                                                                                                                                                                                                                                                                                                                                                                                                                                                                     |  |  |                                                                                                                                                                                                                                                                                                                                                                                                                                                                                                                                       |                          |         |         |         |         |         |         |                                                                                                                                                                                                                                                                                                                                                                                                                            |                                                                                                                                                                                                                                                                                                                                                                                                                                                               |                                                                                                                                                                                                                                                                                                                                                                                                                                         |                                                                                                                                                                                                                                                                                                                                                                        |                                                                                                                                                                                                                                                                                                                                                                                                                                                                                                                                             |                                                                                                                                               |                                                                                                                                                                                                                                                                                                                                                                                                                                                                                                                                                                                                                                                                                                                                                                                                                                                                                                                                                                                                                                                                                                                                                                                                                                                                                                                                                                                                                                                                                                                                                                                                                                                                     |                                                                  |  |  |  |  |         |         |         |         |         |                                                                                                                                                                                                                 |                                                                                                                                                                                                                                                                             |                                                                                                                                                                                                                                               |                                                                                                                                                                                                                                                                                                                 |                                                                                                                                                                                                                                                                          |
|                                                                                                                                                                                                                                                                                                                                                                                                                                                                                                                                       | <p>Completes all required tasks for residency and first rotation site orientation</p> <p>Articulates health care missions at participating sites</p>                                                                                                                                                                                                                                                                       | <p>Uses electronic health record (EHR) efficiently and independently</p> <p>Adapts to clinical work in different sites and health care systems (e.g., VA, university medical center)</p> <p>Maintains access to all needed systems</p> <p>Identifies target patient populations, and the differences in demographics and needs of these populations at each participating site</p> <p>Accesses support services appropriately at different practice sites</p>                                                                                                                                                                                                                                                                                                                                                                                                                                                                                                                                                                                                                                                                                                                                                                                                                                                                                                                                                                                                                                                                                                                                                                                                                                                                                                                                                                                                                                                                                                                                                                                                                                                                                                                                                                                                                                                                                                                                                                                                                                                                                                                               | <p>Effectively navigates systems to overcome obstacles to optimal patient care (e.g., facilitating access to care)</p> <p>Identifies target patient populations, differences in demographics, and can use the appropriate agencies/resources to address specific needs of these populations</p>                                                                                                                                         | <p>Recognizes the differences between a system change and a work-around (a bypass of a recognized system fault that attempts to improve efficiency)</p> <p>Identifies at least one work-around, explores opportunities for change, and when possible, takes steps to improve the system fault that incited it</p>                                                      | <p>Adapts learning from one system or setting to another, and in this way, can effect or stimulate improvements in a system, and does so when the need arises</p>                                                                                                                                                                                                                                                                                                                                                                           |  |  |                                                                                                                                                                                                                                                                                                                                                                                                                                                                                                                                       |                          |         |         |         |         |         |         |                                                                                                                                                                                                                                                                                                                                                                                                                            |                                                                                                                                                                                                                                                                                                                                                                                                                                                               |                                                                                                                                                                                                                                                                                                                                                                                                                                         |                                                                                                                                                                                                                                                                                                                                                                        |                                                                                                                                                                                                                                                                                                                                                                                                                                                                                                                                             |                                                                                                                                               |                                                                                                                                                                                                                                                                                                                                                                                                                                                                                                                                                                                                                                                                                                                                                                                                                                                                                                                                                                                                                                                                                                                                                                                                                                                                                                                                                                                                                                                                                                                                                                                                                                                                     |                                                                  |  |  |  |  |         |         |         |         |         |                                                                                                                                                                                                                 |                                                                                                                                                                                                                                                                             |                                                                                                                                                                                                                                               |                                                                                                                                                                                                                                                                                                                 |                                                                                                                                                                                                                                                                          |
| Systems-Based Practice 1: Patient Safety and Quality Improvement                                                                                                                                                                                                                                                                                                                                                                                                                                                                      |                                                                                                                                                                                                                                                                                                                                                                                                                            |                                                                                                                                                                                                                                                                                                                                                                                                                                                                                                                                                                                                                                                                                                                                                                                                                                                                                                                                                                                                                                                                                                                                                                                                                                                                                                                                                                                                                                                                                                                                                                                                                                                                                                                                                                                                                                                                                                                                                                                                                                                                                                                                                                                                                                                                                                                                                                                                                                                                                                                                                                                             |                                                                                                                                                                                                                                                                                                                                                                                                                                         |                                                                                                                                                                                                                                                                                                                                                                        |                                                                                                                                                                                                                                                                                                                                                                                                                                                                                                                                             |  |  |                                                                                                                                                                                                                                                                                                                                                                                                                                                                                                                                       |                          |         |         |         |         |         |         |                                                                                                                                                                                                                                                                                                                                                                                                                            |                                                                                                                                                                                                                                                                                                                                                                                                                                                               |                                                                                                                                                                                                                                                                                                                                                                                                                                         |                                                                                                                                                                                                                                                                                                                                                                        |                                                                                                                                                                                                                                                                                                                                                                                                                                                                                                                                             |                                                                                                                                               |                                                                                                                                                                                                                                                                                                                                                                                                                                                                                                                                                                                                                                                                                                                                                                                                                                                                                                                                                                                                                                                                                                                                                                                                                                                                                                                                                                                                                                                                                                                                                                                                                                                                     |                                                                  |  |  |  |  |         |         |         |         |         |                                                                                                                                                                                                                 |                                                                                                                                                                                                                                                                             |                                                                                                                                                                                                                                               |                                                                                                                                                                                                                                                                                                                 |                                                                                                                                                                                                                                                                          |
| Level 1                                                                                                                                                                                                                                                                                                                                                                                                                                                                                                                               | Level 2                                                                                                                                                                                                                                                                                                                                                                                                                    | Level 3                                                                                                                                                                                                                                                                                                                                                                                                                                                                                                                                                                                                                                                                                                                                                                                                                                                                                                                                                                                                                                                                                                                                                                                                                                                                                                                                                                                                                                                                                                                                                                                                                                                                                                                                                                                                                                                                                                                                                                                                                                                                                                                                                                                                                                                                                                                                                                                                                                                                                                                                                                                     | Level 4                                                                                                                                                                                                                                                                                                                                                                                                                                 | Level 5                                                                                                                                                                                                                                                                                                                                                                |                                                                                                                                                                                                                                                                                                                                                                                                                                                                                                                                             |  |  |                                                                                                                                                                                                                                                                                                                                                                                                                                                                                                                                       |                          |         |         |         |         |         |         |                                                                                                                                                                                                                                                                                                                                                                                                                            |                                                                                                                                                                                                                                                                                                                                                                                                                                                               |                                                                                                                                                                                                                                                                                                                                                                                                                                         |                                                                                                                                                                                                                                                                                                                                                                        |                                                                                                                                                                                                                                                                                                                                                                                                                                                                                                                                             |                                                                                                                                               |                                                                                                                                                                                                                                                                                                                                                                                                                                                                                                                                                                                                                                                                                                                                                                                                                                                                                                                                                                                                                                                                                                                                                                                                                                                                                                                                                                                                                                                                                                                                                                                                                                                                     |                                                                  |  |  |  |  |         |         |         |         |         |                                                                                                                                                                                                                 |                                                                                                                                                                                                                                                                             |                                                                                                                                                                                                                                               |                                                                                                                                                                                                                                                                                                                 |                                                                                                                                                                                                                                                                          |
| <p>Demonstrates knowledge of common safety events</p> <p>Demonstrates knowledge of how to report patient safety events</p> <p>Demonstrates knowledge of basic quality improvement methodologies and metrics</p>                                                                                                                                                                                                                                                                                                                       | <p>Identifies system factors that lead to safety events</p> <p>Reports patient safety events through institutional reporting systems</p> <p>Describes local quality improvement initiatives (e.g., handwashing, needle stick prevention, wrong site surgery prevention)</p>                                                                                                                                                | <p>Participates in analysis of safety events (simulated or actual)</p> <p>Participates in disclosure of patient safety events to patients and families (simulated or actual)</p> <p>Participates in local quality improvement initiatives</p>                                                                                                                                                                                                                                                                                                                                                                                                                                                                                                                                                                                                                                                                                                                                                                                                                                                                                                                                                                                                                                                                                                                                                                                                                                                                                                                                                                                                                                                                                                                                                                                                                                                                                                                                                                                                                                                                                                                                                                                                                                                                                                                                                                                                                                                                                                                                               | <p>Conducts analysis of safety events and offers error prevention strategies (simulated or actual)</p> <p>Discloses patient safety events to patients and families (simulated or actual)</p> <p>Demonstrates the skills required to identify, develop, implement, and analyze a quality improvement project</p>                                                                                                                         | <p>Actively engages teams and processes to modify systems to prevent safety events</p> <p>Mentors others in the disclosure of patient safety events</p> <p>Creates, implements, and assesses quality improvement initiatives at the institutional or community level</p>                                                                                               |                                                                                                                                                                                                                                                                                                                                                                                                                                                                                                                                             |  |  |                                                                                                                                                                                                                                                                                                                                                                                                                                                                                                                                       |                          |         |         |         |         |         |         |                                                                                                                                                                                                                                                                                                                                                                                                                            |                                                                                                                                                                                                                                                                                                                                                                                                                                                               |                                                                                                                                                                                                                                                                                                                                                                                                                                         |                                                                                                                                                                                                                                                                                                                                                                        |                                                                                                                                                                                                                                                                                                                                                                                                                                                                                                                                             |                                                                                                                                               |                                                                                                                                                                                                                                                                                                                                                                                                                                                                                                                                                                                                                                                                                                                                                                                                                                                                                                                                                                                                                                                                                                                                                                                                                                                                                                                                                                                                                                                                                                                                                                                                                                                                     |                                                                  |  |  |  |  |         |         |         |         |         |                                                                                                                                                                                                                 |                                                                                                                                                                                                                                                                             |                                                                                                                                                                                                                                               |                                                                                                                                                                                                                                                                                                                 |                                                                                                                                                                                                                                                                          |

|             |       |                                                                                                                                                                                                    |                                                                                                                                                                                                                                                                                                                                                                                                                                                                                                                                                                                 |                                                                                                                                                                                                                                                                                                                                                                                                                                                                                                                                   |                                                                                                                                                                                                                                                                                                                                                                                                                                                                                                     |                                                                                                                                                                        |                                                                                                                                                                                                                                                                                                                                                                                                                                                                                          |                                                                                                                                                                                                                                  |                                                                                                                                                                                                                                                                                                                                   |                                                                                                                                                                                                                                                                                                                          |                                                                                                                                                                                                                                                                                                                                                             |                                                                                                                                                                                                                                                                                                                                    |
|-------------|-------|----------------------------------------------------------------------------------------------------------------------------------------------------------------------------------------------------|---------------------------------------------------------------------------------------------------------------------------------------------------------------------------------------------------------------------------------------------------------------------------------------------------------------------------------------------------------------------------------------------------------------------------------------------------------------------------------------------------------------------------------------------------------------------------------|-----------------------------------------------------------------------------------------------------------------------------------------------------------------------------------------------------------------------------------------------------------------------------------------------------------------------------------------------------------------------------------------------------------------------------------------------------------------------------------------------------------------------------------|-----------------------------------------------------------------------------------------------------------------------------------------------------------------------------------------------------------------------------------------------------------------------------------------------------------------------------------------------------------------------------------------------------------------------------------------------------------------------------------------------------|------------------------------------------------------------------------------------------------------------------------------------------------------------------------|------------------------------------------------------------------------------------------------------------------------------------------------------------------------------------------------------------------------------------------------------------------------------------------------------------------------------------------------------------------------------------------------------------------------------------------------------------------------------------------|----------------------------------------------------------------------------------------------------------------------------------------------------------------------------------------------------------------------------------|-----------------------------------------------------------------------------------------------------------------------------------------------------------------------------------------------------------------------------------------------------------------------------------------------------------------------------------|--------------------------------------------------------------------------------------------------------------------------------------------------------------------------------------------------------------------------------------------------------------------------------------------------------------------------|-------------------------------------------------------------------------------------------------------------------------------------------------------------------------------------------------------------------------------------------------------------------------------------------------------------------------------------------------------------|------------------------------------------------------------------------------------------------------------------------------------------------------------------------------------------------------------------------------------------------------------------------------------------------------------------------------------|
| Dermatology | Teams | <b>SBP2. Works effectively within an interprofessional team</b>                                                                                                                                    |                                                                                                                                                                                                                                                                                                                                                                                                                                                                                                                                                                                 |                                                                                                                                                                                                                                                                                                                                                                                                                                                                                                                                   |                                                                                                                                                                                                                                                                                                                                                                                                                                                                                                     |                                                                                                                                                                        | CC                                                                                                                                                                                                                                                                                                                                                                                                                                                                                       | <b>Systems-Based Practice 2: System Navigation for Patient-Centered Care</b>                                                                                                                                                     |                                                                                                                                                                                                                                                                                                                                   |                                                                                                                                                                                                                                                                                                                          |                                                                                                                                                                                                                                                                                                                                                             |                                                                                                                                                                                                                                                                                                                                    |
|             | CC    | Has not Achieved Level 1                                                                                                                                                                           | Level 1                                                                                                                                                                                                                                                                                                                                                                                                                                                                                                                                                                         | Level 2                                                                                                                                                                                                                                                                                                                                                                                                                                                                                                                           | Level 3                                                                                                                                                                                                                                                                                                                                                                                                                                                                                             | Level 4                                                                                                                                                                |                                                                                                                                                                                                                                                                                                                                                                                                                                                                                          | Level 5                                                                                                                                                                                                                          | Level 1                                                                                                                                                                                                                                                                                                                           | Level 2                                                                                                                                                                                                                                                                                                                  | Level 3                                                                                                                                                                                                                                                                                                                                                     | Level 4                                                                                                                                                                                                                                                                                                                            |
|             | PS    |                                                                                                                                                                                                    | Identifies members of the team who coordinate patient care<br><br>Describes own role as member of the health care team                                                                                                                                                                                                                                                                                                                                                                                                                                                          | Uses and consults with other health care providers in coordination of patient care<br><br>Appropriately communicates and coordinates care with the primary care and/or referral provider(s)<br><br>Describes unique contributions (knowledge, skills, and attitudes) of other health care professionals, and seeks their input for appropriate issues<br><br>Describes the use of checklists and briefings to prevent adverse events in health care; recognizes the roles of team members and participates in briefings           | Delegates tasks appropriately to members of the health care team<br><br>Attends and contributes to academic department/division retreats (or similar organizational venue), as well as to clinic team/staff meetings at participating sites<br><br>Facilitates checklist-guided briefings (e.g., pre-procedure timeouts) in health care activities                                                                                                                                                  | Demonstrates how to manage, use, and coordinate the inter-professional team<br><br>Participates in an interdisciplinary team meeting for clinic or program improvement | Leads an interdisciplinary team                                                                                                                                                                                                                                                                                                                                                                                                                                                          | Demonstrates knowledge of care coordination<br><br>Identifies key elements for safe and effective transitions of care and hand-offs<br><br>Demonstrates knowledge of population and community health needs and disparities       | Coordinates care of patients in routine clinical situations effectively using the roles of the interprofessional teams<br><br>Performs safe and effective transitions of care/hand-offs in routine clinical situations<br><br>Identifies specific population and community health needs and inequities for their local population | Coordinates care of patients in complex clinical situations effectively using the roles of their interprofessional teams<br><br>Performs safe and effective transitions of care/hand-offs in complex clinical situations<br><br>Uses local resources effectively to meet the needs of a patient population and community | Leads effective coordination of patient-centered care among different disciplines and specialties<br><br>Advocates for safe and effective transitions of care/hand-offs within and across health care delivery systems including outpatient settings<br><br>Participates in changing and adapting practice to provide for the needs of specific populations | Analyzes the process of care coordination and leads in the design and implementation of improvements<br><br>Improves quality of transitions of care within and across health care delivery systems to optimize patient outcomes<br><br>Leads innovations and advocates for populations and communities with health care inequities |
| Dermatology | PS    | <b>SBP3. Improves health care delivery by identifying system errors and implementing potential systems solutions</b><br><b>Advocates for quality patient care and optimal patient care systems</b> |                                                                                                                                                                                                                                                                                                                                                                                                                                                                                                                                                                                 |                                                                                                                                                                                                                                                                                                                                                                                                                                                                                                                                   |                                                                                                                                                                                                                                                                                                                                                                                                                                                                                                     |                                                                                                                                                                        | HC Systems                                                                                                                                                                                                                                                                                                                                                                                                                                                                               | <b>Systems-Based Practice 3: Physician Role in Health Care Systems</b>                                                                                                                                                           |                                                                                                                                                                                                                                                                                                                                   |                                                                                                                                                                                                                                                                                                                          |                                                                                                                                                                                                                                                                                                                                                             |                                                                                                                                                                                                                                                                                                                                    |
|             |       | Has not Achieved Level 1                                                                                                                                                                           | Level 1                                                                                                                                                                                                                                                                                                                                                                                                                                                                                                                                                                         | Level 2                                                                                                                                                                                                                                                                                                                                                                                                                                                                                                                           | Level 3                                                                                                                                                                                                                                                                                                                                                                                                                                                                                             | Level 4                                                                                                                                                                |                                                                                                                                                                                                                                                                                                                                                                                                                                                                                          | Level 5                                                                                                                                                                                                                          | Level 1                                                                                                                                                                                                                                                                                                                           | Level 2                                                                                                                                                                                                                                                                                                                  | Level 3                                                                                                                                                                                                                                                                                                                                                     | Level 4                                                                                                                                                                                                                                                                                                                            |
|             |       |                                                                                                                                                                                                    | Articulates understanding of the limitations of the health care system and potential for systems errors<br><br>Articulates understanding of institutional risk management resources available<br><br>Begins to identify the social/governmental services necessary for vulnerable populations, including determination of eligibility for services and delivery of some aspects of care<br><br>Begins to advocate for optimal patient care in the setting of interdisciplinary interactions (e.g., discussions with insurance companies or care providers in other specialties) | Participates in discussion during conferences that highlight systems errors<br><br>Articulates understanding of the intersection of the legal system and health care system in the context of medical errors<br><br><b>Consistently</b> identifies the social/governmental services necessary for vulnerable populations, including determination of eligibility for services and delivery of some aspects of care<br><br><b>Consistently</b> advocates for optimal patient care in the setting of interdisciplinary interactions | Leads discussion during conferences that highlight systems errors<br><br>Articulates understanding of the legal system and health care system in the context of medical errors<br><br><b>Consistently</b> identifies the social/governmental services necessary for vulnerable populations, including determination of eligibility for services and delivery of some aspects of care<br><br><b>Consistently</b> advocates for optimal patient care in the setting of interdisciplinary interactions | <b>Consistently</b> encourages open and safe discussion of error, and begins to identify and analyze error events                                                      | <b>Consistently</b> encourages open and safe discussion of errors, and characteristically identifies and analyzes error events, habitually approaching medical errors with a system solution methodology<br><br>Actively and routinely engages with teams and processes through which systems are modified to prevent medical errors<br><br>Advocates to improve patient care provided by health care, social, community, and governmental systems, including for vulnerable populations | Identifies key components of the complex health care system<br><br>Describes basic health payment systems and practice models<br><br>Identifies basic practice management knowledge domains for effective transition to practice | Describes how components of a complex health care system are interrelated, and how this impacts patient care<br><br>Delivers care with consideration of each patient's payment model<br><br>Describes core administrative knowledge needed for transition to practice                                                             | Discusses how individual practice affects the broader system<br><br>Engages with patients in shared-decision making, informed by each patient's payment models<br><br>Demonstrates use of information technology required for medical practice                                                                           | Manages various components of the complex health care system to provide efficient and effective patient care<br><br>Advocates for patient care needs with consideration of the limitations of each patient's payment model<br><br>Analyzes individual practice patterns and professional requirements in preparation for practice                           | Advocates for or leads systems change that enhances high-value, efficient, and effective patient care<br><br>Participates in health policy advocacy activities<br><br>Educates others to prepare them for transition to practice                                                                                                   |

|                                               |                  | VERSION BY LU14                                                                                                                                                                                                                                            |                                                                                                                                                                                                                                                                                                                                        |                                                                                                                                                                                                                                                                                                                                                                                                                                                                                                                                                                                                                                                                                                     |                                                                                                                                                                                                                                                                                                                                                                                                                                                                                                                                                                                                                                                                                                                                                                                                                      |                                                                                                                                                                                                                                                                                                                                                                                                |                                                                                                                    |    |  |  |  |  |  |
|-----------------------------------------------|------------------|------------------------------------------------------------------------------------------------------------------------------------------------------------------------------------------------------------------------------------------------------------|----------------------------------------------------------------------------------------------------------------------------------------------------------------------------------------------------------------------------------------------------------------------------------------------------------------------------------------|-----------------------------------------------------------------------------------------------------------------------------------------------------------------------------------------------------------------------------------------------------------------------------------------------------------------------------------------------------------------------------------------------------------------------------------------------------------------------------------------------------------------------------------------------------------------------------------------------------------------------------------------------------------------------------------------------------|----------------------------------------------------------------------------------------------------------------------------------------------------------------------------------------------------------------------------------------------------------------------------------------------------------------------------------------------------------------------------------------------------------------------------------------------------------------------------------------------------------------------------------------------------------------------------------------------------------------------------------------------------------------------------------------------------------------------------------------------------------------------------------------------------------------------|------------------------------------------------------------------------------------------------------------------------------------------------------------------------------------------------------------------------------------------------------------------------------------------------------------------------------------------------------------------------------------------------|--------------------------------------------------------------------------------------------------------------------|----|--|--|--|--|--|
| Dermatology                                   | HC Costs         | SBP4. Practices cost-conscious care (for patients and populations)                                                                                                                                                                                         |                                                                                                                                                                                                                                                                                                                                        |                                                                                                                                                                                                                                                                                                                                                                                                                                                                                                                                                                                                                                                                                                     |                                                                                                                                                                                                                                                                                                                                                                                                                                                                                                                                                                                                                                                                                                                                                                                                                      |                                                                                                                                                                                                                                                                                                                                                                                                |                                                                                                                    |    |  |  |  |  |  |
|                                               |                  | Has not Achieved Level 1                                                                                                                                                                                                                                   | Level 1                                                                                                                                                                                                                                                                                                                                | Level 2                                                                                                                                                                                                                                                                                                                                                                                                                                                                                                                                                                                                                                                                                             | Level 3                                                                                                                                                                                                                                                                                                                                                                                                                                                                                                                                                                                                                                                                                                                                                                                                              | Level 4                                                                                                                                                                                                                                                                                                                                                                                        | Level 5                                                                                                            |    |  |  |  |  |  |
|                                               |                  |                                                                                                                                                                                                                                                            | Articulates awareness of health care costs                                                                                                                                                                                                                                                                                             | Demonstrates knowledge of how a patient's health care is paid for, and how this affects the patient's care<br><br>Articulates awareness of costs for common diagnostic or therapeutic tests, including the cost of performing and interpreting skin biopsies<br><br>Considers cost of medical and surgical therapies, and incorporates this into therapy decisions and discussions with the patient<br><br><b>Demonstrates awareness of minimizing unnecessary care, including tests, procedures, therapies, and ambulatory or hospital encounters</b><br><br>Usually applies principles of coding (ICD-9/10) and reimbursement (E&M levels/procedures) appropriate to medical record documentation | Articulates awareness of common socio-economic barriers that impact patient care<br><br>Articulates understanding of how cost-benefit analysis is applied to patient care (i.e., via principles of screening tests and the development of clinical guidelines)<br><br>Identifies the role of various health care stakeholders, including providers, commercial and government payers, and pharmaceutical industry and medical device companies, and their varied impact on the cost of and access to health care<br><br><b>Consistently applies principles of coding (ICD-9/10) and reimbursement (E&amp;M levels/procedures) appropriate to medical record documentation</b><br><br><b>Identifies and minimizes unnecessary care, including tests, procedures, therapies, and ambulatory or hospital encounters</b> | Articulates an awareness of current debates/issues of health care financing and how it will affect patients, providers, third party payers, and other stakeholders<br><br>Identifies inherent biases of interactions with pharmaceutical and medical device industries<br><br>Demonstrates the incorporation of cost-awareness principles into standard clinical judgments and decision-making | Demonstrates the incorporation of cost-awareness principles into complex clinical scenarios                        |    |  |  |  |  |  |
| Diagnostic Radiology                          | QI               | SBP1: Quality Improvement (QI)                                                                                                                                                                                                                             |                                                                                                                                                                                                                                                                                                                                        |                                                                                                                                                                                                                                                                                                                                                                                                                                                                                                                                                                                                                                                                                                     |                                                                                                                                                                                                                                                                                                                                                                                                                                                                                                                                                                                                                                                                                                                                                                                                                      |                                                                                                                                                                                                                                                                                                                                                                                                |                                                                                                                    | PS |  |  |  |  |  |
|                                               |                  | Has not Achieved Level 1                                                                                                                                                                                                                                   | Level 1                                                                                                                                                                                                                                                                                                                                | Level 2                                                                                                                                                                                                                                                                                                                                                                                                                                                                                                                                                                                                                                                                                             | Level 3                                                                                                                                                                                                                                                                                                                                                                                                                                                                                                                                                                                                                                                                                                                                                                                                              | Level 4                                                                                                                                                                                                                                                                                                                                                                                        | Level 5                                                                                                            |    |  |  |  |  |  |
|                                               |                  |                                                                                                                                                                                                                                                            | Describes departmental QI initiatives<br><br>Describes the departmental incident/occurrence reporting system                                                                                                                                                                                                                           | Incorporates QI into clinical practice<br><br>Participates in the departmental incident/occurrence reporting system                                                                                                                                                                                                                                                                                                                                                                                                                                                                                                                                                                                 | Identifies and begins a systems-based practice project incorporating QI methodology                                                                                                                                                                                                                                                                                                                                                                                                                                                                                                                                                                                                                                                                                                                                  | Completes a systems-based practice project as required by the ACGME Review Committee<br><br>Describes national radiology quality programs (e.g., National Radiology Data Registry, accreditation, peer-review)                                                                                                                                                                                 | Leads a team in the design and implementation of a QI project<br><br>Routinely participates in root cause analysis |    |  |  |  |  |  |
| Systems-Based Practice 1: Patient Safety      |                  |                                                                                                                                                                                                                                                            |                                                                                                                                                                                                                                                                                                                                        |                                                                                                                                                                                                                                                                                                                                                                                                                                                                                                                                                                                                                                                                                                     |                                                                                                                                                                                                                                                                                                                                                                                                                                                                                                                                                                                                                                                                                                                                                                                                                      |                                                                                                                                                                                                                                                                                                                                                                                                |                                                                                                                    |    |  |  |  |  |  |
|                                               |                  | Level 1                                                                                                                                                                                                                                                    | Level 2                                                                                                                                                                                                                                                                                                                                | Level 3                                                                                                                                                                                                                                                                                                                                                                                                                                                                                                                                                                                                                                                                                             | Level 4                                                                                                                                                                                                                                                                                                                                                                                                                                                                                                                                                                                                                                                                                                                                                                                                              | Level 5                                                                                                                                                                                                                                                                                                                                                                                        |                                                                                                                    |    |  |  |  |  |  |
|                                               |                  | Demonstrates knowledge of common patient safety events<br><br>Demonstrates knowledge of how to report patient safety events                                                                                                                                | Identifies system factors that lead to patient safety events<br><br>Reports patient safety events through institutional reporting systems (simulated or actual)                                                                                                                                                                        | Participates in analysis of patient safety events (simulated or actual)<br><br>Participates in disclosure of patient safety events to patients and families (simulated or actual)                                                                                                                                                                                                                                                                                                                                                                                                                                                                                                                   | Conducts analysis of patient safety events and offers error prevention strategies (simulated or actual)<br><br>Discloses patient safety events to patients and families (simulated or actual)                                                                                                                                                                                                                                                                                                                                                                                                                                                                                                                                                                                                                        | Actively engages teams and processes to modify systems to prevent patient safety events<br><br>Role models or mentors others in the disclosure of patient safety events                                                                                                                                                                                                                        |                                                                                                                    |    |  |  |  |  |  |
| Diagnostic Radiology                          | HC Costs Revenue | SBP2: Health care economics                                                                                                                                                                                                                                |                                                                                                                                                                                                                                                                                                                                        |                                                                                                                                                                                                                                                                                                                                                                                                                                                                                                                                                                                                                                                                                                     |                                                                                                                                                                                                                                                                                                                                                                                                                                                                                                                                                                                                                                                                                                                                                                                                                      |                                                                                                                                                                                                                                                                                                                                                                                                |                                                                                                                    | QI |  |  |  |  |  |
|                                               |                  | Has not Achieved Level 1                                                                                                                                                                                                                                   | Level 1                                                                                                                                                                                                                                                                                                                                | Level 2                                                                                                                                                                                                                                                                                                                                                                                                                                                                                                                                                                                                                                                                                             | Level 3                                                                                                                                                                                                                                                                                                                                                                                                                                                                                                                                                                                                                                                                                                                                                                                                              | Level 4                                                                                                                                                                                                                                                                                                                                                                                        | Level 5                                                                                                            |    |  |  |  |  |  |
|                                               |                  |                                                                                                                                                                                                                                                            | Describes the mechanisms for reimbursement, including types of payors                                                                                                                                                                                                                                                                  | States relative cost of common procedures                                                                                                                                                                                                                                                                                                                                                                                                                                                                                                                                                                                                                                                           | Describes the technical and professional components of imaging costs                                                                                                                                                                                                                                                                                                                                                                                                                                                                                                                                                                                                                                                                                                                                                 | Describes measurements of productivity (e.g., RVUs)                                                                                                                                                                                                                                                                                                                                            | Describes the radiology revenue cycle                                                                              |    |  |  |  |  |  |
| Systems-Based Practice 2: Quality Improvement |                  |                                                                                                                                                                                                                                                            |                                                                                                                                                                                                                                                                                                                                        |                                                                                                                                                                                                                                                                                                                                                                                                                                                                                                                                                                                                                                                                                                     |                                                                                                                                                                                                                                                                                                                                                                                                                                                                                                                                                                                                                                                                                                                                                                                                                      |                                                                                                                                                                                                                                                                                                                                                                                                |                                                                                                                    |    |  |  |  |  |  |
|                                               |                  | Level 1                                                                                                                                                                                                                                                    | Level 2                                                                                                                                                                                                                                                                                                                                | Level 3                                                                                                                                                                                                                                                                                                                                                                                                                                                                                                                                                                                                                                                                                             | Level 4                                                                                                                                                                                                                                                                                                                                                                                                                                                                                                                                                                                                                                                                                                                                                                                                              | Level 5                                                                                                                                                                                                                                                                                                                                                                                        |                                                                                                                    |    |  |  |  |  |  |
|                                               |                  | Demonstrates knowledge of basic quality improvement methodologies and metrics                                                                                                                                                                              | Describes local quality improvement initiatives                                                                                                                                                                                                                                                                                        | Participates in local quality improvement initiatives                                                                                                                                                                                                                                                                                                                                                                                                                                                                                                                                                                                                                                               | Demonstrates the skills required to identify, develop, implement, and analyze a quality improvement project                                                                                                                                                                                                                                                                                                                                                                                                                                                                                                                                                                                                                                                                                                          | Creates, implements, and assesses quality improvement initiatives at the institutional or community level                                                                                                                                                                                                                                                                                      |                                                                                                                    |    |  |  |  |  |  |
| Diagnostic Radiology                          |                  |                                                                                                                                                                                                                                                            |                                                                                                                                                                                                                                                                                                                                        |                                                                                                                                                                                                                                                                                                                                                                                                                                                                                                                                                                                                                                                                                                     |                                                                                                                                                                                                                                                                                                                                                                                                                                                                                                                                                                                                                                                                                                                                                                                                                      |                                                                                                                                                                                                                                                                                                                                                                                                |                                                                                                                    | CC |  |  |  |  |  |
|                                               |                  | SBP3: System Navigation for Patient-Centered Care                                                                                                                                                                                                          |                                                                                                                                                                                                                                                                                                                                        |                                                                                                                                                                                                                                                                                                                                                                                                                                                                                                                                                                                                                                                                                                     |                                                                                                                                                                                                                                                                                                                                                                                                                                                                                                                                                                                                                                                                                                                                                                                                                      |                                                                                                                                                                                                                                                                                                                                                                                                |                                                                                                                    |    |  |  |  |  |  |
|                                               |                  | Level 1                                                                                                                                                                                                                                                    | Level 2                                                                                                                                                                                                                                                                                                                                | Level 3                                                                                                                                                                                                                                                                                                                                                                                                                                                                                                                                                                                                                                                                                             | Level 4                                                                                                                                                                                                                                                                                                                                                                                                                                                                                                                                                                                                                                                                                                                                                                                                              | Level 5                                                                                                                                                                                                                                                                                                                                                                                        |                                                                                                                    |    |  |  |  |  |  |
|                                               |                  | Demonstrates knowledge of care coordination in radiology imaging/procedures<br><br>Identifies key elements for safe and effective transitions of care and hand-offs<br><br>Demonstrates knowledge of population and community health needs and disparities | Coordinates care of patients in routine radiology imaging/procedures effectively using the roles of interprofessional teams<br><br>Performs safe and effective transitions of care/hand-offs in routine clinical situations<br><br>Identifies specific population and community health needs and inequities for their local population | Coordinates care of patients in complex radiology imaging/procedures effectively using the roles of interprofessional teams<br><br>Performs safe and effective transitions of care/hand-offs in complex clinical situations<br><br>Identifies local resources available to meet the needs of a patient population and community                                                                                                                                                                                                                                                                                                                                                                     | Role models effective coordination of patient-centered care among different disciplines and specialties<br><br>Role models safe and effective transitions of care/hand-offs<br><br>Participates in adapting the practice to provide for the needs of specific populations (actual or simulated)                                                                                                                                                                                                                                                                                                                                                                                                                                                                                                                      | Analyzes the process of care coordination and leads in the design and implementation of improvements<br><br>Improves quality of transitions of care to optimize patient outcomes<br><br>Leads innovations and advocates for populations and communities with health care inequities                                                                                                            |                                                                                                                    |    |  |  |  |  |  |



| Diagnostic Radiology                                                                                                         |                                                                                                                       |                                                                                                                                                                                                                                                                                                                                                                                                                                                                                                                                                                                                                                                                                                                                                                                                                                                                                                                                                                                                                                                                                                                                                                                                                                                                                                                                                                                                                                                                                                                                                                                | HC Systems                                                                                                                                                                                                                                                                                               | <table border="1"> <thead> <tr> <th colspan="5">Systems-Based Practice 4: Physician Role in Health Care Systems</th> </tr> <tr> <th>Level 1</th> <th>Level 2</th> <th>Level 3</th> <th>Level 4</th> <th>Level 5</th> </tr> </thead> <tbody> <tr> <td>Identifies key components of the complex healthcare system (e.g., hospital, finance, personnel, technology)</td> <td>Describes how components of a complex health care system are inter-related, and how this impacts patient care</td> <td>Discusses how individual practice affects the broader system (e.g., length of stay, readmission rates, clinical efficiency)</td> <td>Manages various components of the complex health care system to provide efficient and effective patient care and transition of care</td> <td>Advocates for or leads systems change that enhances high-value, efficient, and effective patient care and transition of care</td> </tr> <tr> <td>Describes the mechanisms for reimbursement, including types of payors</td> <td>States relative cost of common procedures</td> <td>Describes the technical and professional components of imaging costs</td> <td>Describes the radiology revenue cycle and measurements of productivity (e.g., relative value units)</td> <td>Participates in health policy advocacy activities</td> </tr> </tbody> </table> | Systems-Based Practice 4: Physician Role in Health Care Systems                                                                                                                                                                                                                                            |  |  |  |                          | Level 1 | Level 2 | Level 3 | Level 4 | Level 5 | Identifies key components of the complex healthcare system (e.g., hospital, finance, personnel, technology)                  | Describes how components of a complex health care system are inter-related, and how this impacts patient care         | Discusses how individual practice affects the broader system (e.g., length of stay, readmission rates, clinical efficiency) | Manages various components of the complex health care system to provide efficient and effective patient care and transition of care                                                                                                                                                                      | Advocates for or leads systems change that enhances high-value, efficient, and effective patient care and transition of care                                                                                                                                                                                                   | Describes the mechanisms for reimbursement, including types of payors                                                                                                                                                                                                                                      | States relative cost of common procedures | Describes the technical and professional components of imaging costs | Describes the radiology revenue cycle and measurements of productivity (e.g., relative value units) | Participates in health policy advocacy activities |
|------------------------------------------------------------------------------------------------------------------------------|-----------------------------------------------------------------------------------------------------------------------|--------------------------------------------------------------------------------------------------------------------------------------------------------------------------------------------------------------------------------------------------------------------------------------------------------------------------------------------------------------------------------------------------------------------------------------------------------------------------------------------------------------------------------------------------------------------------------------------------------------------------------------------------------------------------------------------------------------------------------------------------------------------------------------------------------------------------------------------------------------------------------------------------------------------------------------------------------------------------------------------------------------------------------------------------------------------------------------------------------------------------------------------------------------------------------------------------------------------------------------------------------------------------------------------------------------------------------------------------------------------------------------------------------------------------------------------------------------------------------------------------------------------------------------------------------------------------------|----------------------------------------------------------------------------------------------------------------------------------------------------------------------------------------------------------------------------------------------------------------------------------------------------------|-------------------------------------------------------------------------------------------------------------------------------------------------------------------------------------------------------------------------------------------------------------------------------------------------------------------------------------------------------------------------------------------------------------------------------------------------------------------------------------------------------------------------------------------------------------------------------------------------------------------------------------------------------------------------------------------------------------------------------------------------------------------------------------------------------------------------------------------------------------------------------------------------------------------------------------------------------------------------------------------------------------------------------------------------------------------------------------------------------------------------------------------------------------------------------------------------------------------------------------------------------------------------------------------------------------------------------------------------|------------------------------------------------------------------------------------------------------------------------------------------------------------------------------------------------------------------------------------------------------------------------------------------------------------|--|--|--|--------------------------|---------|---------|---------|---------|---------|------------------------------------------------------------------------------------------------------------------------------|-----------------------------------------------------------------------------------------------------------------------|-----------------------------------------------------------------------------------------------------------------------------|----------------------------------------------------------------------------------------------------------------------------------------------------------------------------------------------------------------------------------------------------------------------------------------------------------|--------------------------------------------------------------------------------------------------------------------------------------------------------------------------------------------------------------------------------------------------------------------------------------------------------------------------------|------------------------------------------------------------------------------------------------------------------------------------------------------------------------------------------------------------------------------------------------------------------------------------------------------------|-------------------------------------------|----------------------------------------------------------------------|-----------------------------------------------------------------------------------------------------|---------------------------------------------------|
| Systems-Based Practice 4: Physician Role in Health Care Systems                                                              |                                                                                                                       |                                                                                                                                                                                                                                                                                                                                                                                                                                                                                                                                                                                                                                                                                                                                                                                                                                                                                                                                                                                                                                                                                                                                                                                                                                                                                                                                                                                                                                                                                                                                                                                |                                                                                                                                                                                                                                                                                                          |                                                                                                                                                                                                                                                                                                                                                                                                                                                                                                                                                                                                                                                                                                                                                                                                                                                                                                                                                                                                                                                                                                                                                                                                                                                                                                                                                 |                                                                                                                                                                                                                                                                                                            |  |  |  |                          |         |         |         |         |         |                                                                                                                              |                                                                                                                       |                                                                                                                             |                                                                                                                                                                                                                                                                                                          |                                                                                                                                                                                                                                                                                                                                |                                                                                                                                                                                                                                                                                                            |                                           |                                                                      |                                                                                                     |                                                   |
| Level 1                                                                                                                      | Level 2                                                                                                               | Level 3                                                                                                                                                                                                                                                                                                                                                                                                                                                                                                                                                                                                                                                                                                                                                                                                                                                                                                                                                                                                                                                                                                                                                                                                                                                                                                                                                                                                                                                                                                                                                                        | Level 4                                                                                                                                                                                                                                                                                                  | Level 5                                                                                                                                                                                                                                                                                                                                                                                                                                                                                                                                                                                                                                                                                                                                                                                                                                                                                                                                                                                                                                                                                                                                                                                                                                                                                                                                         |                                                                                                                                                                                                                                                                                                            |  |  |  |                          |         |         |         |         |         |                                                                                                                              |                                                                                                                       |                                                                                                                             |                                                                                                                                                                                                                                                                                                          |                                                                                                                                                                                                                                                                                                                                |                                                                                                                                                                                                                                                                                                            |                                           |                                                                      |                                                                                                     |                                                   |
| Identifies key components of the complex healthcare system (e.g., hospital, finance, personnel, technology)                  | Describes how components of a complex health care system are inter-related, and how this impacts patient care         | Discusses how individual practice affects the broader system (e.g., length of stay, readmission rates, clinical efficiency)                                                                                                                                                                                                                                                                                                                                                                                                                                                                                                                                                                                                                                                                                                                                                                                                                                                                                                                                                                                                                                                                                                                                                                                                                                                                                                                                                                                                                                                    | Manages various components of the complex health care system to provide efficient and effective patient care and transition of care                                                                                                                                                                      | Advocates for or leads systems change that enhances high-value, efficient, and effective patient care and transition of care                                                                                                                                                                                                                                                                                                                                                                                                                                                                                                                                                                                                                                                                                                                                                                                                                                                                                                                                                                                                                                                                                                                                                                                                                    |                                                                                                                                                                                                                                                                                                            |  |  |  |                          |         |         |         |         |         |                                                                                                                              |                                                                                                                       |                                                                                                                             |                                                                                                                                                                                                                                                                                                          |                                                                                                                                                                                                                                                                                                                                |                                                                                                                                                                                                                                                                                                            |                                           |                                                                      |                                                                                                     |                                                   |
| Describes the mechanisms for reimbursement, including types of payors                                                        | States relative cost of common procedures                                                                             | Describes the technical and professional components of imaging costs                                                                                                                                                                                                                                                                                                                                                                                                                                                                                                                                                                                                                                                                                                                                                                                                                                                                                                                                                                                                                                                                                                                                                                                                                                                                                                                                                                                                                                                                                                           | Describes the radiology revenue cycle and measurements of productivity (e.g., relative value units)                                                                                                                                                                                                      | Participates in health policy advocacy activities                                                                                                                                                                                                                                                                                                                                                                                                                                                                                                                                                                                                                                                                                                                                                                                                                                                                                                                                                                                                                                                                                                                                                                                                                                                                                               |                                                                                                                                                                                                                                                                                                            |  |  |  |                          |         |         |         |         |         |                                                                                                                              |                                                                                                                       |                                                                                                                             |                                                                                                                                                                                                                                                                                                          |                                                                                                                                                                                                                                                                                                                                |                                                                                                                                                                                                                                                                                                            |                                           |                                                                      |                                                                                                     |                                                   |
| Diagnostic Radiology                                                                                                         |                                                                                                                       |                                                                                                                                                                                                                                                                                                                                                                                                                                                                                                                                                                                                                                                                                                                                                                                                                                                                                                                                                                                                                                                                                                                                                                                                                                                                                                                                                                                                                                                                                                                                                                                | PS                                                                                                                                                                                                                                                                                                       | <table border="1"> <thead> <tr> <th colspan="5">Systems-Based Practice 5: Contrast Agent Safety</th> </tr> <tr> <th>Level 1</th> <th>Level 2</th> <th>Level 3</th> <th>Level 4</th> <th>Level 5</th> </tr> </thead> <tbody> <tr> <td>Demonstrates knowledge of contrast reactions</td> <td>Recognizes contrast reactions (simulated or actual)</td> <td>Manages contrast reactions, with supervision (simulated or actual)</td> <td>Independently manages contrast reactions (simulated or actual)</td> <td>Leads educational experience in simulation laboratory for contrast reaction</td> </tr> </tbody> </table>                                                                                                                                                                                                                                                                                                                                                                                                                                                                                                                                                                                                                                                                                                                            | Systems-Based Practice 5: Contrast Agent Safety                                                                                                                                                                                                                                                            |  |  |  |                          | Level 1 | Level 2 | Level 3 | Level 4 | Level 5 | Demonstrates knowledge of contrast reactions                                                                                 | Recognizes contrast reactions (simulated or actual)                                                                   | Manages contrast reactions, with supervision (simulated or actual)                                                          | Independently manages contrast reactions (simulated or actual)                                                                                                                                                                                                                                           | Leads educational experience in simulation laboratory for contrast reaction                                                                                                                                                                                                                                                    |                                                                                                                                                                                                                                                                                                            |                                           |                                                                      |                                                                                                     |                                                   |
| Systems-Based Practice 5: Contrast Agent Safety                                                                              |                                                                                                                       |                                                                                                                                                                                                                                                                                                                                                                                                                                                                                                                                                                                                                                                                                                                                                                                                                                                                                                                                                                                                                                                                                                                                                                                                                                                                                                                                                                                                                                                                                                                                                                                |                                                                                                                                                                                                                                                                                                          |                                                                                                                                                                                                                                                                                                                                                                                                                                                                                                                                                                                                                                                                                                                                                                                                                                                                                                                                                                                                                                                                                                                                                                                                                                                                                                                                                 |                                                                                                                                                                                                                                                                                                            |  |  |  |                          |         |         |         |         |         |                                                                                                                              |                                                                                                                       |                                                                                                                             |                                                                                                                                                                                                                                                                                                          |                                                                                                                                                                                                                                                                                                                                |                                                                                                                                                                                                                                                                                                            |                                           |                                                                      |                                                                                                     |                                                   |
| Level 1                                                                                                                      | Level 2                                                                                                               | Level 3                                                                                                                                                                                                                                                                                                                                                                                                                                                                                                                                                                                                                                                                                                                                                                                                                                                                                                                                                                                                                                                                                                                                                                                                                                                                                                                                                                                                                                                                                                                                                                        | Level 4                                                                                                                                                                                                                                                                                                  | Level 5                                                                                                                                                                                                                                                                                                                                                                                                                                                                                                                                                                                                                                                                                                                                                                                                                                                                                                                                                                                                                                                                                                                                                                                                                                                                                                                                         |                                                                                                                                                                                                                                                                                                            |  |  |  |                          |         |         |         |         |         |                                                                                                                              |                                                                                                                       |                                                                                                                             |                                                                                                                                                                                                                                                                                                          |                                                                                                                                                                                                                                                                                                                                |                                                                                                                                                                                                                                                                                                            |                                           |                                                                      |                                                                                                     |                                                   |
| Demonstrates knowledge of contrast reactions                                                                                 | Recognizes contrast reactions (simulated or actual)                                                                   | Manages contrast reactions, with supervision (simulated or actual)                                                                                                                                                                                                                                                                                                                                                                                                                                                                                                                                                                                                                                                                                                                                                                                                                                                                                                                                                                                                                                                                                                                                                                                                                                                                                                                                                                                                                                                                                                             | Independently manages contrast reactions (simulated or actual)                                                                                                                                                                                                                                           | Leads educational experience in simulation laboratory for contrast reaction                                                                                                                                                                                                                                                                                                                                                                                                                                                                                                                                                                                                                                                                                                                                                                                                                                                                                                                                                                                                                                                                                                                                                                                                                                                                     |                                                                                                                                                                                                                                                                                                            |  |  |  |                          |         |         |         |         |         |                                                                                                                              |                                                                                                                       |                                                                                                                             |                                                                                                                                                                                                                                                                                                          |                                                                                                                                                                                                                                                                                                                                |                                                                                                                                                                                                                                                                                                            |                                           |                                                                      |                                                                                                     |                                                   |
| Diagnostic Radiology                                                                                                         |                                                                                                                       |                                                                                                                                                                                                                                                                                                                                                                                                                                                                                                                                                                                                                                                                                                                                                                                                                                                                                                                                                                                                                                                                                                                                                                                                                                                                                                                                                                                                                                                                                                                                                                                | PS                                                                                                                                                                                                                                                                                                       | <table border="1"> <thead> <tr> <th colspan="5">Systems-Based Practice 6: Radiation Safety</th> </tr> <tr> <th>Level 1</th> <th>Level 2</th> <th>Level 3</th> <th>Level 4</th> <th>Level 5</th> </tr> </thead> <tbody> <tr> <td>Demonstrates knowledge of the mechanisms of radiation injury and the ALARA ("as low as reasonably achievable") concept</td> <td>Accesses resources to determine exam-specific average radiation dose information</td> <td>Communicates the relative risk of exam-specific radiation exposure to patients and practitioners</td> <td>Applies principles of ALARA in daily practice</td> <td>Creates, implements, and assesses radiation safety initiatives at the institutional level</td> </tr> </tbody> </table>                                                                                                                                                                                                                                                                                                                                                                                                                                                                                                                                                                                               | Systems-Based Practice 6: Radiation Safety                                                                                                                                                                                                                                                                 |  |  |  |                          | Level 1 | Level 2 | Level 3 | Level 4 | Level 5 | Demonstrates knowledge of the mechanisms of radiation injury and the ALARA ("as low as reasonably achievable") concept       | Accesses resources to determine exam-specific average radiation dose information                                      | Communicates the relative risk of exam-specific radiation exposure to patients and practitioners                            | Applies principles of ALARA in daily practice                                                                                                                                                                                                                                                            | Creates, implements, and assesses radiation safety initiatives at the institutional level                                                                                                                                                                                                                                      |                                                                                                                                                                                                                                                                                                            |                                           |                                                                      |                                                                                                     |                                                   |
| Systems-Based Practice 6: Radiation Safety                                                                                   |                                                                                                                       |                                                                                                                                                                                                                                                                                                                                                                                                                                                                                                                                                                                                                                                                                                                                                                                                                                                                                                                                                                                                                                                                                                                                                                                                                                                                                                                                                                                                                                                                                                                                                                                |                                                                                                                                                                                                                                                                                                          |                                                                                                                                                                                                                                                                                                                                                                                                                                                                                                                                                                                                                                                                                                                                                                                                                                                                                                                                                                                                                                                                                                                                                                                                                                                                                                                                                 |                                                                                                                                                                                                                                                                                                            |  |  |  |                          |         |         |         |         |         |                                                                                                                              |                                                                                                                       |                                                                                                                             |                                                                                                                                                                                                                                                                                                          |                                                                                                                                                                                                                                                                                                                                |                                                                                                                                                                                                                                                                                                            |                                           |                                                                      |                                                                                                     |                                                   |
| Level 1                                                                                                                      | Level 2                                                                                                               | Level 3                                                                                                                                                                                                                                                                                                                                                                                                                                                                                                                                                                                                                                                                                                                                                                                                                                                                                                                                                                                                                                                                                                                                                                                                                                                                                                                                                                                                                                                                                                                                                                        | Level 4                                                                                                                                                                                                                                                                                                  | Level 5                                                                                                                                                                                                                                                                                                                                                                                                                                                                                                                                                                                                                                                                                                                                                                                                                                                                                                                                                                                                                                                                                                                                                                                                                                                                                                                                         |                                                                                                                                                                                                                                                                                                            |  |  |  |                          |         |         |         |         |         |                                                                                                                              |                                                                                                                       |                                                                                                                             |                                                                                                                                                                                                                                                                                                          |                                                                                                                                                                                                                                                                                                                                |                                                                                                                                                                                                                                                                                                            |                                           |                                                                      |                                                                                                     |                                                   |
| Demonstrates knowledge of the mechanisms of radiation injury and the ALARA ("as low as reasonably achievable") concept       | Accesses resources to determine exam-specific average radiation dose information                                      | Communicates the relative risk of exam-specific radiation exposure to patients and practitioners                                                                                                                                                                                                                                                                                                                                                                                                                                                                                                                                                                                                                                                                                                                                                                                                                                                                                                                                                                                                                                                                                                                                                                                                                                                                                                                                                                                                                                                                               | Applies principles of ALARA in daily practice                                                                                                                                                                                                                                                            | Creates, implements, and assesses radiation safety initiatives at the institutional level                                                                                                                                                                                                                                                                                                                                                                                                                                                                                                                                                                                                                                                                                                                                                                                                                                                                                                                                                                                                                                                                                                                                                                                                                                                       |                                                                                                                                                                                                                                                                                                            |  |  |  |                          |         |         |         |         |         |                                                                                                                              |                                                                                                                       |                                                                                                                             |                                                                                                                                                                                                                                                                                                          |                                                                                                                                                                                                                                                                                                                                |                                                                                                                                                                                                                                                                                                            |                                           |                                                                      |                                                                                                     |                                                   |
| Diagnostic Radiology                                                                                                         |                                                                                                                       |                                                                                                                                                                                                                                                                                                                                                                                                                                                                                                                                                                                                                                                                                                                                                                                                                                                                                                                                                                                                                                                                                                                                                                                                                                                                                                                                                                                                                                                                                                                                                                                | PS                                                                                                                                                                                                                                                                                                       | <table border="1"> <thead> <tr> <th colspan="5">Systems-Based Practice 7: Magnetic Resonance (MR) Safety</th> </tr> <tr> <th>Level 1</th> <th>Level 2</th> <th>Level 3</th> <th>Level 4</th> <th>Level 5</th> </tr> </thead> <tbody> <tr> <td>Demonstrates knowledge of the risks of magnetic resonance imaging (MRI), including safety zones and pre-MR screening</td> <td>Accesses resources to determine the safety of implanted devices and retained foreign bodies</td> <td>Communicates MR safety, including implants and retained foreign bodies, to patients and practitioners</td> <td>Applies principles of MR safety to daily practice</td> <td>Creates, implements, and assesses MR safety initiatives at the institutional level</td> </tr> </tbody> </table>                                                                                                                                                                                                                                                                                                                                                                                                                                                                                                                                                                      | Systems-Based Practice 7: Magnetic Resonance (MR) Safety                                                                                                                                                                                                                                                   |  |  |  |                          | Level 1 | Level 2 | Level 3 | Level 4 | Level 5 | Demonstrates knowledge of the risks of magnetic resonance imaging (MRI), including safety zones and pre-MR screening         | Accesses resources to determine the safety of implanted devices and retained foreign bodies                           | Communicates MR safety, including implants and retained foreign bodies, to patients and practitioners                       | Applies principles of MR safety to daily practice                                                                                                                                                                                                                                                        | Creates, implements, and assesses MR safety initiatives at the institutional level                                                                                                                                                                                                                                             |                                                                                                                                                                                                                                                                                                            |                                           |                                                                      |                                                                                                     |                                                   |
| Systems-Based Practice 7: Magnetic Resonance (MR) Safety                                                                     |                                                                                                                       |                                                                                                                                                                                                                                                                                                                                                                                                                                                                                                                                                                                                                                                                                                                                                                                                                                                                                                                                                                                                                                                                                                                                                                                                                                                                                                                                                                                                                                                                                                                                                                                |                                                                                                                                                                                                                                                                                                          |                                                                                                                                                                                                                                                                                                                                                                                                                                                                                                                                                                                                                                                                                                                                                                                                                                                                                                                                                                                                                                                                                                                                                                                                                                                                                                                                                 |                                                                                                                                                                                                                                                                                                            |  |  |  |                          |         |         |         |         |         |                                                                                                                              |                                                                                                                       |                                                                                                                             |                                                                                                                                                                                                                                                                                                          |                                                                                                                                                                                                                                                                                                                                |                                                                                                                                                                                                                                                                                                            |                                           |                                                                      |                                                                                                     |                                                   |
| Level 1                                                                                                                      | Level 2                                                                                                               | Level 3                                                                                                                                                                                                                                                                                                                                                                                                                                                                                                                                                                                                                                                                                                                                                                                                                                                                                                                                                                                                                                                                                                                                                                                                                                                                                                                                                                                                                                                                                                                                                                        | Level 4                                                                                                                                                                                                                                                                                                  | Level 5                                                                                                                                                                                                                                                                                                                                                                                                                                                                                                                                                                                                                                                                                                                                                                                                                                                                                                                                                                                                                                                                                                                                                                                                                                                                                                                                         |                                                                                                                                                                                                                                                                                                            |  |  |  |                          |         |         |         |         |         |                                                                                                                              |                                                                                                                       |                                                                                                                             |                                                                                                                                                                                                                                                                                                          |                                                                                                                                                                                                                                                                                                                                |                                                                                                                                                                                                                                                                                                            |                                           |                                                                      |                                                                                                     |                                                   |
| Demonstrates knowledge of the risks of magnetic resonance imaging (MRI), including safety zones and pre-MR screening         | Accesses resources to determine the safety of implanted devices and retained foreign bodies                           | Communicates MR safety, including implants and retained foreign bodies, to patients and practitioners                                                                                                                                                                                                                                                                                                                                                                                                                                                                                                                                                                                                                                                                                                                                                                                                                                                                                                                                                                                                                                                                                                                                                                                                                                                                                                                                                                                                                                                                          | Applies principles of MR safety to daily practice                                                                                                                                                                                                                                                        | Creates, implements, and assesses MR safety initiatives at the institutional level                                                                                                                                                                                                                                                                                                                                                                                                                                                                                                                                                                                                                                                                                                                                                                                                                                                                                                                                                                                                                                                                                                                                                                                                                                                              |                                                                                                                                                                                                                                                                                                            |  |  |  |                          |         |         |         |         |         |                                                                                                                              |                                                                                                                       |                                                                                                                             |                                                                                                                                                                                                                                                                                                          |                                                                                                                                                                                                                                                                                                                                |                                                                                                                                                                                                                                                                                                            |                                           |                                                                      |                                                                                                     |                                                   |
| Diagnostic Radiology                                                                                                         |                                                                                                                       |                                                                                                                                                                                                                                                                                                                                                                                                                                                                                                                                                                                                                                                                                                                                                                                                                                                                                                                                                                                                                                                                                                                                                                                                                                                                                                                                                                                                                                                                                                                                                                                | Informatics                                                                                                                                                                                                                                                                                              | <table border="1"> <thead> <tr> <th colspan="5">Systems-Based Practice 8: Informatics</th> </tr> <tr> <th>Level 1</th> <th>Level 2</th> <th>Level 3</th> <th>Level 4</th> <th>Level 5</th> </tr> </thead> <tbody> <tr> <td>Demonstrates familiarity with information systems, including EHR, radiology information system, and picture archiving system</td> <td>Demonstrates familiarity with information standards in radiology, and describes their roles</td> <td>Describes approaches to capture and integrate data from radiology examinations into medical decision making</td> <td>Applies knowledge of information systems, standards, and data to support radiology initiatives, as appropriate</td> <td>Participates in operational and strategic information systems meetings; applies informatics knowledge to help guide direction and operation of the radiology department</td> </tr> </tbody> </table>                                                                                                                                                                                                                                                                                                                                                                                                                         | Systems-Based Practice 8: Informatics                                                                                                                                                                                                                                                                      |  |  |  |                          | Level 1 | Level 2 | Level 3 | Level 4 | Level 5 | Demonstrates familiarity with information systems, including EHR, radiology information system, and picture archiving system | Demonstrates familiarity with information standards in radiology, and describes their roles                           | Describes approaches to capture and integrate data from radiology examinations into medical decision making                 | Applies knowledge of information systems, standards, and data to support radiology initiatives, as appropriate                                                                                                                                                                                           | Participates in operational and strategic information systems meetings; applies informatics knowledge to help guide direction and operation of the radiology department                                                                                                                                                        |                                                                                                                                                                                                                                                                                                            |                                           |                                                                      |                                                                                                     |                                                   |
| Systems-Based Practice 8: Informatics                                                                                        |                                                                                                                       |                                                                                                                                                                                                                                                                                                                                                                                                                                                                                                                                                                                                                                                                                                                                                                                                                                                                                                                                                                                                                                                                                                                                                                                                                                                                                                                                                                                                                                                                                                                                                                                |                                                                                                                                                                                                                                                                                                          |                                                                                                                                                                                                                                                                                                                                                                                                                                                                                                                                                                                                                                                                                                                                                                                                                                                                                                                                                                                                                                                                                                                                                                                                                                                                                                                                                 |                                                                                                                                                                                                                                                                                                            |  |  |  |                          |         |         |         |         |         |                                                                                                                              |                                                                                                                       |                                                                                                                             |                                                                                                                                                                                                                                                                                                          |                                                                                                                                                                                                                                                                                                                                |                                                                                                                                                                                                                                                                                                            |                                           |                                                                      |                                                                                                     |                                                   |
| Level 1                                                                                                                      | Level 2                                                                                                               | Level 3                                                                                                                                                                                                                                                                                                                                                                                                                                                                                                                                                                                                                                                                                                                                                                                                                                                                                                                                                                                                                                                                                                                                                                                                                                                                                                                                                                                                                                                                                                                                                                        | Level 4                                                                                                                                                                                                                                                                                                  | Level 5                                                                                                                                                                                                                                                                                                                                                                                                                                                                                                                                                                                                                                                                                                                                                                                                                                                                                                                                                                                                                                                                                                                                                                                                                                                                                                                                         |                                                                                                                                                                                                                                                                                                            |  |  |  |                          |         |         |         |         |         |                                                                                                                              |                                                                                                                       |                                                                                                                             |                                                                                                                                                                                                                                                                                                          |                                                                                                                                                                                                                                                                                                                                |                                                                                                                                                                                                                                                                                                            |                                           |                                                                      |                                                                                                     |                                                   |
| Demonstrates familiarity with information systems, including EHR, radiology information system, and picture archiving system | Demonstrates familiarity with information standards in radiology, and describes their roles                           | Describes approaches to capture and integrate data from radiology examinations into medical decision making                                                                                                                                                                                                                                                                                                                                                                                                                                                                                                                                                                                                                                                                                                                                                                                                                                                                                                                                                                                                                                                                                                                                                                                                                                                                                                                                                                                                                                                                    | Applies knowledge of information systems, standards, and data to support radiology initiatives, as appropriate                                                                                                                                                                                           | Participates in operational and strategic information systems meetings; applies informatics knowledge to help guide direction and operation of the radiology department                                                                                                                                                                                                                                                                                                                                                                                                                                                                                                                                                                                                                                                                                                                                                                                                                                                                                                                                                                                                                                                                                                                                                                         |                                                                                                                                                                                                                                                                                                            |  |  |  |                          |         |         |         |         |         |                                                                                                                              |                                                                                                                       |                                                                                                                             |                                                                                                                                                                                                                                                                                                          |                                                                                                                                                                                                                                                                                                                                |                                                                                                                                                                                                                                                                                                            |                                           |                                                                      |                                                                                                     |                                                   |
| Emergency Medicine                                                                                                           | PS                                                                                                                    | <table border="1"> <thead> <tr> <th colspan="6">16. Patient Safety (SBP1) Participates in performance improvement to optimize patient safety.</th> </tr> <tr> <th>Has not Achieved Level 1</th> <th>Level 1</th> <th>Level 2</th> <th>Level 3</th> <th>Level 4</th> <th>Level 5</th> </tr> </thead> <tbody> <tr> <td></td> <td>Adheres to standards for maintenance of a safe working environment<br/><br/>Describes medical errors and adverse events</td> <td>Routinely uses basic patient safety practices, such as time-outs and 'calls for help'</td> <td>Describes patient safety concepts<br/><br/>Employs processes (e.g., checklists, SBAR), personnel, and technologies that optimize patient safety (SBAR= Situation – Background – Assessment – Recommendation)<br/><br/>Appropriately uses system resources to improve both patient care and medical knowledge</td> <td>Participates in an institutional process improvement plan to optimize ED practice and patient safety<br/><br/>Leads team reflection such as code debriefings, root cause analysis, or M&amp;M to improve ED performance<br/><br/>Identifies situations when the breakdown in teamwork or communication may contribute to medical error</td> <td>Uses analytical tools to assess healthcare quality and safety and reassess quality improvement programs for effectiveness for patients and for populations<br/><br/>Develops and evaluates measures of professional performance and process improvement and implements them to improve departmental practice</td> </tr> </tbody> </table> | 16. Patient Safety (SBP1) Participates in performance improvement to optimize patient safety.                                                                                                                                                                                                            |                                                                                                                                                                                                                                                                                                                                                                                                                                                                                                                                                                                                                                                                                                                                                                                                                                                                                                                                                                                                                                                                                                                                                                                                                                                                                                                                                 |                                                                                                                                                                                                                                                                                                            |  |  |  | Has not Achieved Level 1 | Level 1 | Level 2 | Level 3 | Level 4 | Level 5 |                                                                                                                              | Adheres to standards for maintenance of a safe working environment<br><br>Describes medical errors and adverse events | Routinely uses basic patient safety practices, such as time-outs and 'calls for help'                                       | Describes patient safety concepts<br><br>Employs processes (e.g., checklists, SBAR), personnel, and technologies that optimize patient safety (SBAR= Situation – Background – Assessment – Recommendation)<br><br>Appropriately uses system resources to improve both patient care and medical knowledge | Participates in an institutional process improvement plan to optimize ED practice and patient safety<br><br>Leads team reflection such as code debriefings, root cause analysis, or M&M to improve ED performance<br><br>Identifies situations when the breakdown in teamwork or communication may contribute to medical error | Uses analytical tools to assess healthcare quality and safety and reassess quality improvement programs for effectiveness for patients and for populations<br><br>Develops and evaluates measures of professional performance and process improvement and implements them to improve departmental practice |                                           |                                                                      |                                                                                                     |                                                   |
| 16. Patient Safety (SBP1) Participates in performance improvement to optimize patient safety.                                |                                                                                                                       |                                                                                                                                                                                                                                                                                                                                                                                                                                                                                                                                                                                                                                                                                                                                                                                                                                                                                                                                                                                                                                                                                                                                                                                                                                                                                                                                                                                                                                                                                                                                                                                |                                                                                                                                                                                                                                                                                                          |                                                                                                                                                                                                                                                                                                                                                                                                                                                                                                                                                                                                                                                                                                                                                                                                                                                                                                                                                                                                                                                                                                                                                                                                                                                                                                                                                 |                                                                                                                                                                                                                                                                                                            |  |  |  |                          |         |         |         |         |         |                                                                                                                              |                                                                                                                       |                                                                                                                             |                                                                                                                                                                                                                                                                                                          |                                                                                                                                                                                                                                                                                                                                |                                                                                                                                                                                                                                                                                                            |                                           |                                                                      |                                                                                                     |                                                   |
| Has not Achieved Level 1                                                                                                     | Level 1                                                                                                               | Level 2                                                                                                                                                                                                                                                                                                                                                                                                                                                                                                                                                                                                                                                                                                                                                                                                                                                                                                                                                                                                                                                                                                                                                                                                                                                                                                                                                                                                                                                                                                                                                                        | Level 3                                                                                                                                                                                                                                                                                                  | Level 4                                                                                                                                                                                                                                                                                                                                                                                                                                                                                                                                                                                                                                                                                                                                                                                                                                                                                                                                                                                                                                                                                                                                                                                                                                                                                                                                         | Level 5                                                                                                                                                                                                                                                                                                    |  |  |  |                          |         |         |         |         |         |                                                                                                                              |                                                                                                                       |                                                                                                                             |                                                                                                                                                                                                                                                                                                          |                                                                                                                                                                                                                                                                                                                                |                                                                                                                                                                                                                                                                                                            |                                           |                                                                      |                                                                                                     |                                                   |
|                                                                                                                              | Adheres to standards for maintenance of a safe working environment<br><br>Describes medical errors and adverse events | Routinely uses basic patient safety practices, such as time-outs and 'calls for help'                                                                                                                                                                                                                                                                                                                                                                                                                                                                                                                                                                                                                                                                                                                                                                                                                                                                                                                                                                                                                                                                                                                                                                                                                                                                                                                                                                                                                                                                                          | Describes patient safety concepts<br><br>Employs processes (e.g., checklists, SBAR), personnel, and technologies that optimize patient safety (SBAR= Situation – Background – Assessment – Recommendation)<br><br>Appropriately uses system resources to improve both patient care and medical knowledge | Participates in an institutional process improvement plan to optimize ED practice and patient safety<br><br>Leads team reflection such as code debriefings, root cause analysis, or M&M to improve ED performance<br><br>Identifies situations when the breakdown in teamwork or communication may contribute to medical error                                                                                                                                                                                                                                                                                                                                                                                                                                                                                                                                                                                                                                                                                                                                                                                                                                                                                                                                                                                                                  | Uses analytical tools to assess healthcare quality and safety and reassess quality improvement programs for effectiveness for patients and for populations<br><br>Develops and evaluates measures of professional performance and process improvement and implements them to improve departmental practice |  |  |  |                          |         |         |         |         |         |                                                                                                                              |                                                                                                                       |                                                                                                                             |                                                                                                                                                                                                                                                                                                          |                                                                                                                                                                                                                                                                                                                                |                                                                                                                                                                                                                                                                                                            |                                           |                                                                      |                                                                                                     |                                                   |

| <p><b>Emergency Medicine</b></p>                                                 | <p>HC Systems</p>                                                                                                                                                                                                         | <p><b>17. Systems-based Management (SBP2) Participates in strategies to improve healthcare delivery and flow. Demonstrates an awareness of and responsiveness to the larger context and system of health care.</b></p> <table border="1"> <thead> <tr> <th>Has not Achieved Level 1</th> <th>Level 1</th> <th>Level 2</th> <th>Level 3</th> <th>Level 4</th> <th>Level 5</th> </tr> </thead> <tbody> <tr> <td></td> <td>Describes members of ED team (e.g., nurses, technicians, and security)</td> <td>Mobilizes institutional resources to assist in patient care<br/><br/>Participates in patient satisfaction initiatives</td> <td>Practices cost-effective care<br/><br/>Demonstrates the ability to call effectively on other resources in the system to provide optimal health care</td> <td>Participates in processes and logistics to improve patient flow and decrease turnaround times (e.g., rapid triage, bedside registration, Fast Tracks, bedside testing, rapid treatment units, standard protocols, and observation units)<br/><br/>Recommends strategies by which patients' access to care can be improved<br/><br/>Coordinates system resources to optimize a patient's care for complicated medical situations</td> <td>Creates departmental flow metric from benchmarks, best practices, and dash boards<br/><br/>Develops internal and external departmental solutions to process and operational problems<br/><br/>Addresses the differing customer needs of patients, hospital medical staff, EMS, and the community</td> </tr> </tbody> </table>                                                                                                                                                                      | Has not Achieved Level 1                                                                                                                                                                                                                                              | Level 1                                                                                                                                                                                                                                                                                                                                                                                                                     | Level 2                                                                                                                                                                                                                                                                                      | Level 3 | Level 4 | Level 5 |  | Describes members of ED team (e.g., nurses, technicians, and security)                                                                                                                                                    | Mobilizes institutional resources to assist in patient care<br><br>Participates in patient satisfaction initiatives                                                                                                                                                                                                                | Practices cost-effective care<br><br>Demonstrates the ability to call effectively on other resources in the system to provide optimal health care                                                                                                                     | Participates in processes and logistics to improve patient flow and decrease turnaround times (e.g., rapid triage, bedside registration, Fast Tracks, bedside testing, rapid treatment units, standard protocols, and observation units)<br><br>Recommends strategies by which patients' access to care can be improved<br><br>Coordinates system resources to optimize a patient's care for complicated medical situations | Creates departmental flow metric from benchmarks, best practices, and dash boards<br><br>Develops internal and external departmental solutions to process and operational problems<br><br>Addresses the differing customer needs of patients, hospital medical staff, EMS, and the community |                  |                                                                                                                                                                                                                                                                                                                                                                                                                                                                                                                                                                                                                                                                                                                                                                                                                                                                                                                                                                                                                                                                                                                                                                                                                                                                                                                                                                                                                                                                                                                                                                                                                                                                                                                                                                                                                                                                                                                                                                          |         |         |         |         |         |                                                        |                                                                                                                               |                                                                                                                              |                                                                                                         |                                                                                                      |                                                                                  |                                                                                             |                                                                                                    |                                                                                                                                                             |                                                                                                                     |                                                                                 |                                                                                                                       |                                                                                          |                                                                                                         |                                                                                                           |
|----------------------------------------------------------------------------------|---------------------------------------------------------------------------------------------------------------------------------------------------------------------------------------------------------------------------|-------------------------------------------------------------------------------------------------------------------------------------------------------------------------------------------------------------------------------------------------------------------------------------------------------------------------------------------------------------------------------------------------------------------------------------------------------------------------------------------------------------------------------------------------------------------------------------------------------------------------------------------------------------------------------------------------------------------------------------------------------------------------------------------------------------------------------------------------------------------------------------------------------------------------------------------------------------------------------------------------------------------------------------------------------------------------------------------------------------------------------------------------------------------------------------------------------------------------------------------------------------------------------------------------------------------------------------------------------------------------------------------------------------------------------------------------------------------------------------------------------------------------------------------------------------------------------------------------------------------------------------------------------------------------------------------------------------------------------------------------|-----------------------------------------------------------------------------------------------------------------------------------------------------------------------------------------------------------------------------------------------------------------------|-----------------------------------------------------------------------------------------------------------------------------------------------------------------------------------------------------------------------------------------------------------------------------------------------------------------------------------------------------------------------------------------------------------------------------|----------------------------------------------------------------------------------------------------------------------------------------------------------------------------------------------------------------------------------------------------------------------------------------------|---------|---------|---------|--|---------------------------------------------------------------------------------------------------------------------------------------------------------------------------------------------------------------------------|------------------------------------------------------------------------------------------------------------------------------------------------------------------------------------------------------------------------------------------------------------------------------------------------------------------------------------|-----------------------------------------------------------------------------------------------------------------------------------------------------------------------------------------------------------------------------------------------------------------------|-----------------------------------------------------------------------------------------------------------------------------------------------------------------------------------------------------------------------------------------------------------------------------------------------------------------------------------------------------------------------------------------------------------------------------|----------------------------------------------------------------------------------------------------------------------------------------------------------------------------------------------------------------------------------------------------------------------------------------------|------------------|--------------------------------------------------------------------------------------------------------------------------------------------------------------------------------------------------------------------------------------------------------------------------------------------------------------------------------------------------------------------------------------------------------------------------------------------------------------------------------------------------------------------------------------------------------------------------------------------------------------------------------------------------------------------------------------------------------------------------------------------------------------------------------------------------------------------------------------------------------------------------------------------------------------------------------------------------------------------------------------------------------------------------------------------------------------------------------------------------------------------------------------------------------------------------------------------------------------------------------------------------------------------------------------------------------------------------------------------------------------------------------------------------------------------------------------------------------------------------------------------------------------------------------------------------------------------------------------------------------------------------------------------------------------------------------------------------------------------------------------------------------------------------------------------------------------------------------------------------------------------------------------------------------------------------------------------------------------------------|---------|---------|---------|---------|---------|--------------------------------------------------------|-------------------------------------------------------------------------------------------------------------------------------|------------------------------------------------------------------------------------------------------------------------------|---------------------------------------------------------------------------------------------------------|------------------------------------------------------------------------------------------------------|----------------------------------------------------------------------------------|---------------------------------------------------------------------------------------------|----------------------------------------------------------------------------------------------------|-------------------------------------------------------------------------------------------------------------------------------------------------------------|---------------------------------------------------------------------------------------------------------------------|---------------------------------------------------------------------------------|-----------------------------------------------------------------------------------------------------------------------|------------------------------------------------------------------------------------------|---------------------------------------------------------------------------------------------------------|-----------------------------------------------------------------------------------------------------------|
| Has not Achieved Level 1                                                         | Level 1                                                                                                                                                                                                                   | Level 2                                                                                                                                                                                                                                                                                                                                                                                                                                                                                                                                                                                                                                                                                                                                                                                                                                                                                                                                                                                                                                                                                                                                                                                                                                                                                                                                                                                                                                                                                                                                                                                                                                                                                                                                         | Level 3                                                                                                                                                                                                                                                               | Level 4                                                                                                                                                                                                                                                                                                                                                                                                                     | Level 5                                                                                                                                                                                                                                                                                      |         |         |         |  |                                                                                                                                                                                                                           |                                                                                                                                                                                                                                                                                                                                    |                                                                                                                                                                                                                                                                       |                                                                                                                                                                                                                                                                                                                                                                                                                             |                                                                                                                                                                                                                                                                                              |                  |                                                                                                                                                                                                                                                                                                                                                                                                                                                                                                                                                                                                                                                                                                                                                                                                                                                                                                                                                                                                                                                                                                                                                                                                                                                                                                                                                                                                                                                                                                                                                                                                                                                                                                                                                                                                                                                                                                                                                                          |         |         |         |         |         |                                                        |                                                                                                                               |                                                                                                                              |                                                                                                         |                                                                                                      |                                                                                  |                                                                                             |                                                                                                    |                                                                                                                                                             |                                                                                                                     |                                                                                 |                                                                                                                       |                                                                                          |                                                                                                         |                                                                                                           |
|                                                                                  | Describes members of ED team (e.g., nurses, technicians, and security)                                                                                                                                                    | Mobilizes institutional resources to assist in patient care<br><br>Participates in patient satisfaction initiatives                                                                                                                                                                                                                                                                                                                                                                                                                                                                                                                                                                                                                                                                                                                                                                                                                                                                                                                                                                                                                                                                                                                                                                                                                                                                                                                                                                                                                                                                                                                                                                                                                             | Practices cost-effective care<br><br>Demonstrates the ability to call effectively on other resources in the system to provide optimal health care                                                                                                                     | Participates in processes and logistics to improve patient flow and decrease turnaround times (e.g., rapid triage, bedside registration, Fast Tracks, bedside testing, rapid treatment units, standard protocols, and observation units)<br><br>Recommends strategies by which patients' access to care can be improved<br><br>Coordinates system resources to optimize a patient's care for complicated medical situations | Creates departmental flow metric from benchmarks, best practices, and dash boards<br><br>Develops internal and external departmental solutions to process and operational problems<br><br>Addresses the differing customer needs of patients, hospital medical staff, EMS, and the community |         |         |         |  |                                                                                                                                                                                                                           |                                                                                                                                                                                                                                                                                                                                    |                                                                                                                                                                                                                                                                       |                                                                                                                                                                                                                                                                                                                                                                                                                             |                                                                                                                                                                                                                                                                                              |                  |                                                                                                                                                                                                                                                                                                                                                                                                                                                                                                                                                                                                                                                                                                                                                                                                                                                                                                                                                                                                                                                                                                                                                                                                                                                                                                                                                                                                                                                                                                                                                                                                                                                                                                                                                                                                                                                                                                                                                                          |         |         |         |         |         |                                                        |                                                                                                                               |                                                                                                                              |                                                                                                         |                                                                                                      |                                                                                  |                                                                                             |                                                                                                    |                                                                                                                                                             |                                                                                                                     |                                                                                 |                                                                                                                       |                                                                                          |                                                                                                         |                                                                                                           |
| <p><b>Emergency Medicine</b></p>                                                 | <p>Informatics</p>                                                                                                                                                                                                        | <p><b>18. Technology (SBP3) Uses technology to accomplish and document safe healthcare delivery.</b></p> <table border="1"> <thead> <tr> <th>Has not Achieved Level 1</th> <th>Level 1</th> <th>Level 2</th> <th>Level 3</th> <th>Level 4</th> <th>Level 5</th> </tr> </thead> <tbody> <tr> <td></td> <td>Uses the Electronic Health Record (EHR) to order tests, medications and document notes, and respond to alerts<br/><br/>Reviews medications for patients</td> <td>Ensures that medical records are complete, with attention to preventing confusion and error<br/><br/>Effectively and ethically uses technology for patient care, medical communication and learning</td> <td>Recognizes the risk of computer shortcuts and reliance upon computer information on accurate patient care and documentation</td> <td>Uses decision support systems in EHR (as applicable in institution)</td> <td>Recommends systems re-design for improved computerized processes</td> </tr> </tbody> </table>                                                                                                                                                                                                                                                                                                                                                                                                                                                                                                                                                                                                                                                                                                                                         | Has not Achieved Level 1                                                                                                                                                                                                                                              | Level 1                                                                                                                                                                                                                                                                                                                                                                                                                     | Level 2                                                                                                                                                                                                                                                                                      | Level 3 | Level 4 | Level 5 |  | Uses the Electronic Health Record (EHR) to order tests, medications and document notes, and respond to alerts<br><br>Reviews medications for patients                                                                     | Ensures that medical records are complete, with attention to preventing confusion and error<br><br>Effectively and ethically uses technology for patient care, medical communication and learning                                                                                                                                  | Recognizes the risk of computer shortcuts and reliance upon computer information on accurate patient care and documentation                                                                                                                                           | Uses decision support systems in EHR (as applicable in institution)                                                                                                                                                                                                                                                                                                                                                         | Recommends systems re-design for improved computerized processes                                                                                                                                                                                                                             |                  |                                                                                                                                                                                                                                                                                                                                                                                                                                                                                                                                                                                                                                                                                                                                                                                                                                                                                                                                                                                                                                                                                                                                                                                                                                                                                                                                                                                                                                                                                                                                                                                                                                                                                                                                                                                                                                                                                                                                                                          |         |         |         |         |         |                                                        |                                                                                                                               |                                                                                                                              |                                                                                                         |                                                                                                      |                                                                                  |                                                                                             |                                                                                                    |                                                                                                                                                             |                                                                                                                     |                                                                                 |                                                                                                                       |                                                                                          |                                                                                                         |                                                                                                           |
| Has not Achieved Level 1                                                         | Level 1                                                                                                                                                                                                                   | Level 2                                                                                                                                                                                                                                                                                                                                                                                                                                                                                                                                                                                                                                                                                                                                                                                                                                                                                                                                                                                                                                                                                                                                                                                                                                                                                                                                                                                                                                                                                                                                                                                                                                                                                                                                         | Level 3                                                                                                                                                                                                                                                               | Level 4                                                                                                                                                                                                                                                                                                                                                                                                                     | Level 5                                                                                                                                                                                                                                                                                      |         |         |         |  |                                                                                                                                                                                                                           |                                                                                                                                                                                                                                                                                                                                    |                                                                                                                                                                                                                                                                       |                                                                                                                                                                                                                                                                                                                                                                                                                             |                                                                                                                                                                                                                                                                                              |                  |                                                                                                                                                                                                                                                                                                                                                                                                                                                                                                                                                                                                                                                                                                                                                                                                                                                                                                                                                                                                                                                                                                                                                                                                                                                                                                                                                                                                                                                                                                                                                                                                                                                                                                                                                                                                                                                                                                                                                                          |         |         |         |         |         |                                                        |                                                                                                                               |                                                                                                                              |                                                                                                         |                                                                                                      |                                                                                  |                                                                                             |                                                                                                    |                                                                                                                                                             |                                                                                                                     |                                                                                 |                                                                                                                       |                                                                                          |                                                                                                         |                                                                                                           |
|                                                                                  | Uses the Electronic Health Record (EHR) to order tests, medications and document notes, and respond to alerts<br><br>Reviews medications for patients                                                                     | Ensures that medical records are complete, with attention to preventing confusion and error<br><br>Effectively and ethically uses technology for patient care, medical communication and learning                                                                                                                                                                                                                                                                                                                                                                                                                                                                                                                                                                                                                                                                                                                                                                                                                                                                                                                                                                                                                                                                                                                                                                                                                                                                                                                                                                                                                                                                                                                                               | Recognizes the risk of computer shortcuts and reliance upon computer information on accurate patient care and documentation                                                                                                                                           | Uses decision support systems in EHR (as applicable in institution)                                                                                                                                                                                                                                                                                                                                                         | Recommends systems re-design for improved computerized processes                                                                                                                                                                                                                             |         |         |         |  |                                                                                                                                                                                                                           |                                                                                                                                                                                                                                                                                                                                    |                                                                                                                                                                                                                                                                       |                                                                                                                                                                                                                                                                                                                                                                                                                             |                                                                                                                                                                                                                                                                                              |                  |                                                                                                                                                                                                                                                                                                                                                                                                                                                                                                                                                                                                                                                                                                                                                                                                                                                                                                                                                                                                                                                                                                                                                                                                                                                                                                                                                                                                                                                                                                                                                                                                                                                                                                                                                                                                                                                                                                                                                                          |         |         |         |         |         |                                                        |                                                                                                                               |                                                                                                                              |                                                                                                         |                                                                                                      |                                                                                  |                                                                                             |                                                                                                    |                                                                                                                                                             |                                                                                                                     |                                                                                 |                                                                                                                       |                                                                                          |                                                                                                         |                                                                                                           |
| <p><b>Family Medicine</b></p>                                                    | <p>HC Costs</p>                                                                                                                                                                                                           | <p><b>SBP-1 Provides cost-conscious medical care</b></p> <table border="1"> <thead> <tr> <th>Has not achieved Level 1</th> <th>Level 1</th> <th>Level 2</th> <th>Level 3</th> <th>Level 4</th> <th>Level 5</th> </tr> </thead> <tbody> <tr> <td></td> <td>Understands that health care resources and costs impact patients and the health care system</td> <td>Knows and considers costs and risks/benefits of different treatment options in common situations</td> <td>Coordinates individual patient care in a way that is sensitive to resource use, efficiency, and effectiveness</td> <td>Partners with patients to consistently use resources efficiently and cost effectively in even the most complex and challenging cases</td> <td>Role models and promotes efficient and cost-effective use of resources in the care of patients in all settings</td> </tr> </tbody> </table>                                                                                                                                                                                                                                                                                                                                                                                                                                                                                                                                                                                                                                                                                                                                                                                                                                                       | Has not achieved Level 1                                                                                                                                                                                                                                              | Level 1                                                                                                                                                                                                                                                                                                                                                                                                                     | Level 2                                                                                                                                                                                                                                                                                      | Level 3 | Level 4 | Level 5 |  | Understands that health care resources and costs impact patients and the health care system                                                                                                                               | Knows and considers costs and risks/benefits of different treatment options in common situations                                                                                                                                                                                                                                   | Coordinates individual patient care in a way that is sensitive to resource use, efficiency, and effectiveness                                                                                                                                                         | Partners with patients to consistently use resources efficiently and cost effectively in even the most complex and challenging cases                                                                                                                                                                                                                                                                                        | Role models and promotes efficient and cost-effective use of resources in the care of patients in all settings                                                                                                                                                                               | <p>PS<br/>QI</p> | <p><b>Systems-Based Practice 1: Patient Safety and Quality Improvement</b></p> <table border="1"> <thead> <tr> <th>Level 1</th> <th>Level 2</th> <th>Level 3</th> <th>Level 4</th> <th>Level 5</th> </tr> </thead> <tbody> <tr> <td>Demonstrates knowledge of common patient safety events</td> <td>Identifies system factors that lead to patient safety events</td> <td>Participates in analysis of patient safety events (simulated or actual)</td> <td>Conducts analysis of patient safety events and offers error prevention strategies (simulated or actual)</td> <td>Actively engages teams and processes to modify systems to prevent patient safety events</td> </tr> <tr> <td>Demonstrates knowledge of how to report patient safety events</td> <td>Reports patient safety events through institutional reporting systems (simulated or actual)</td> <td>Participates in disclosure of patient safety events to patients and families (simulated or actual)</td> <td>Discloses patient safety events to patients and families (simulated or actual)</td> <td>Role models or mentors others in the disclosure of patient safety events</td> </tr> <tr> <td>Demonstrates knowledge of basic quality improvement methodologies and metrics</td> <td>Describes local quality improvement initiatives (e.g., community vaccination rate, infection rate, smoking cessation)</td> <td>Participates in local quality improvement initiatives</td> <td>Demonstrates skills required to identify, develop, implement, and analyze a quality improvement project</td> <td>Designs, implements, and assesses quality improvement initiatives at the institutional or community level</td> </tr> </tbody> </table>                                                                                                                                                                                                                                                        | Level 1 | Level 2 | Level 3 | Level 4 | Level 5 | Demonstrates knowledge of common patient safety events | Identifies system factors that lead to patient safety events                                                                  | Participates in analysis of patient safety events (simulated or actual)                                                      | Conducts analysis of patient safety events and offers error prevention strategies (simulated or actual) | Actively engages teams and processes to modify systems to prevent patient safety events              | Demonstrates knowledge of how to report patient safety events                    | Reports patient safety events through institutional reporting systems (simulated or actual) | Participates in disclosure of patient safety events to patients and families (simulated or actual) | Discloses patient safety events to patients and families (simulated or actual)                                                                              | Role models or mentors others in the disclosure of patient safety events                                            | Demonstrates knowledge of basic quality improvement methodologies and metrics   | Describes local quality improvement initiatives (e.g., community vaccination rate, infection rate, smoking cessation) | Participates in local quality improvement initiatives                                    | Demonstrates skills required to identify, develop, implement, and analyze a quality improvement project | Designs, implements, and assesses quality improvement initiatives at the institutional or community level |
| Has not achieved Level 1                                                         | Level 1                                                                                                                                                                                                                   | Level 2                                                                                                                                                                                                                                                                                                                                                                                                                                                                                                                                                                                                                                                                                                                                                                                                                                                                                                                                                                                                                                                                                                                                                                                                                                                                                                                                                                                                                                                                                                                                                                                                                                                                                                                                         | Level 3                                                                                                                                                                                                                                                               | Level 4                                                                                                                                                                                                                                                                                                                                                                                                                     | Level 5                                                                                                                                                                                                                                                                                      |         |         |         |  |                                                                                                                                                                                                                           |                                                                                                                                                                                                                                                                                                                                    |                                                                                                                                                                                                                                                                       |                                                                                                                                                                                                                                                                                                                                                                                                                             |                                                                                                                                                                                                                                                                                              |                  |                                                                                                                                                                                                                                                                                                                                                                                                                                                                                                                                                                                                                                                                                                                                                                                                                                                                                                                                                                                                                                                                                                                                                                                                                                                                                                                                                                                                                                                                                                                                                                                                                                                                                                                                                                                                                                                                                                                                                                          |         |         |         |         |         |                                                        |                                                                                                                               |                                                                                                                              |                                                                                                         |                                                                                                      |                                                                                  |                                                                                             |                                                                                                    |                                                                                                                                                             |                                                                                                                     |                                                                                 |                                                                                                                       |                                                                                          |                                                                                                         |                                                                                                           |
|                                                                                  | Understands that health care resources and costs impact patients and the health care system                                                                                                                               | Knows and considers costs and risks/benefits of different treatment options in common situations                                                                                                                                                                                                                                                                                                                                                                                                                                                                                                                                                                                                                                                                                                                                                                                                                                                                                                                                                                                                                                                                                                                                                                                                                                                                                                                                                                                                                                                                                                                                                                                                                                                | Coordinates individual patient care in a way that is sensitive to resource use, efficiency, and effectiveness                                                                                                                                                         | Partners with patients to consistently use resources efficiently and cost effectively in even the most complex and challenging cases                                                                                                                                                                                                                                                                                        | Role models and promotes efficient and cost-effective use of resources in the care of patients in all settings                                                                                                                                                                               |         |         |         |  |                                                                                                                                                                                                                           |                                                                                                                                                                                                                                                                                                                                    |                                                                                                                                                                                                                                                                       |                                                                                                                                                                                                                                                                                                                                                                                                                             |                                                                                                                                                                                                                                                                                              |                  |                                                                                                                                                                                                                                                                                                                                                                                                                                                                                                                                                                                                                                                                                                                                                                                                                                                                                                                                                                                                                                                                                                                                                                                                                                                                                                                                                                                                                                                                                                                                                                                                                                                                                                                                                                                                                                                                                                                                                                          |         |         |         |         |         |                                                        |                                                                                                                               |                                                                                                                              |                                                                                                         |                                                                                                      |                                                                                  |                                                                                             |                                                                                                    |                                                                                                                                                             |                                                                                                                     |                                                                                 |                                                                                                                       |                                                                                          |                                                                                                         |                                                                                                           |
| Level 1                                                                          | Level 2                                                                                                                                                                                                                   | Level 3                                                                                                                                                                                                                                                                                                                                                                                                                                                                                                                                                                                                                                                                                                                                                                                                                                                                                                                                                                                                                                                                                                                                                                                                                                                                                                                                                                                                                                                                                                                                                                                                                                                                                                                                         | Level 4                                                                                                                                                                                                                                                               | Level 5                                                                                                                                                                                                                                                                                                                                                                                                                     |                                                                                                                                                                                                                                                                                              |         |         |         |  |                                                                                                                                                                                                                           |                                                                                                                                                                                                                                                                                                                                    |                                                                                                                                                                                                                                                                       |                                                                                                                                                                                                                                                                                                                                                                                                                             |                                                                                                                                                                                                                                                                                              |                  |                                                                                                                                                                                                                                                                                                                                                                                                                                                                                                                                                                                                                                                                                                                                                                                                                                                                                                                                                                                                                                                                                                                                                                                                                                                                                                                                                                                                                                                                                                                                                                                                                                                                                                                                                                                                                                                                                                                                                                          |         |         |         |         |         |                                                        |                                                                                                                               |                                                                                                                              |                                                                                                         |                                                                                                      |                                                                                  |                                                                                             |                                                                                                    |                                                                                                                                                             |                                                                                                                     |                                                                                 |                                                                                                                       |                                                                                          |                                                                                                         |                                                                                                           |
| Demonstrates knowledge of common patient safety events                           | Identifies system factors that lead to patient safety events                                                                                                                                                              | Participates in analysis of patient safety events (simulated or actual)                                                                                                                                                                                                                                                                                                                                                                                                                                                                                                                                                                                                                                                                                                                                                                                                                                                                                                                                                                                                                                                                                                                                                                                                                                                                                                                                                                                                                                                                                                                                                                                                                                                                         | Conducts analysis of patient safety events and offers error prevention strategies (simulated or actual)                                                                                                                                                               | Actively engages teams and processes to modify systems to prevent patient safety events                                                                                                                                                                                                                                                                                                                                     |                                                                                                                                                                                                                                                                                              |         |         |         |  |                                                                                                                                                                                                                           |                                                                                                                                                                                                                                                                                                                                    |                                                                                                                                                                                                                                                                       |                                                                                                                                                                                                                                                                                                                                                                                                                             |                                                                                                                                                                                                                                                                                              |                  |                                                                                                                                                                                                                                                                                                                                                                                                                                                                                                                                                                                                                                                                                                                                                                                                                                                                                                                                                                                                                                                                                                                                                                                                                                                                                                                                                                                                                                                                                                                                                                                                                                                                                                                                                                                                                                                                                                                                                                          |         |         |         |         |         |                                                        |                                                                                                                               |                                                                                                                              |                                                                                                         |                                                                                                      |                                                                                  |                                                                                             |                                                                                                    |                                                                                                                                                             |                                                                                                                     |                                                                                 |                                                                                                                       |                                                                                          |                                                                                                         |                                                                                                           |
| Demonstrates knowledge of how to report patient safety events                    | Reports patient safety events through institutional reporting systems (simulated or actual)                                                                                                                               | Participates in disclosure of patient safety events to patients and families (simulated or actual)                                                                                                                                                                                                                                                                                                                                                                                                                                                                                                                                                                                                                                                                                                                                                                                                                                                                                                                                                                                                                                                                                                                                                                                                                                                                                                                                                                                                                                                                                                                                                                                                                                              | Discloses patient safety events to patients and families (simulated or actual)                                                                                                                                                                                        | Role models or mentors others in the disclosure of patient safety events                                                                                                                                                                                                                                                                                                                                                    |                                                                                                                                                                                                                                                                                              |         |         |         |  |                                                                                                                                                                                                                           |                                                                                                                                                                                                                                                                                                                                    |                                                                                                                                                                                                                                                                       |                                                                                                                                                                                                                                                                                                                                                                                                                             |                                                                                                                                                                                                                                                                                              |                  |                                                                                                                                                                                                                                                                                                                                                                                                                                                                                                                                                                                                                                                                                                                                                                                                                                                                                                                                                                                                                                                                                                                                                                                                                                                                                                                                                                                                                                                                                                                                                                                                                                                                                                                                                                                                                                                                                                                                                                          |         |         |         |         |         |                                                        |                                                                                                                               |                                                                                                                              |                                                                                                         |                                                                                                      |                                                                                  |                                                                                             |                                                                                                    |                                                                                                                                                             |                                                                                                                     |                                                                                 |                                                                                                                       |                                                                                          |                                                                                                         |                                                                                                           |
| Demonstrates knowledge of basic quality improvement methodologies and metrics    | Describes local quality improvement initiatives (e.g., community vaccination rate, infection rate, smoking cessation)                                                                                                     | Participates in local quality improvement initiatives                                                                                                                                                                                                                                                                                                                                                                                                                                                                                                                                                                                                                                                                                                                                                                                                                                                                                                                                                                                                                                                                                                                                                                                                                                                                                                                                                                                                                                                                                                                                                                                                                                                                                           | Demonstrates skills required to identify, develop, implement, and analyze a quality improvement project                                                                                                                                                               | Designs, implements, and assesses quality improvement initiatives at the institutional or community level                                                                                                                                                                                                                                                                                                                   |                                                                                                                                                                                                                                                                                              |         |         |         |  |                                                                                                                                                                                                                           |                                                                                                                                                                                                                                                                                                                                    |                                                                                                                                                                                                                                                                       |                                                                                                                                                                                                                                                                                                                                                                                                                             |                                                                                                                                                                                                                                                                                              |                  |                                                                                                                                                                                                                                                                                                                                                                                                                                                                                                                                                                                                                                                                                                                                                                                                                                                                                                                                                                                                                                                                                                                                                                                                                                                                                                                                                                                                                                                                                                                                                                                                                                                                                                                                                                                                                                                                                                                                                                          |         |         |         |         |         |                                                        |                                                                                                                               |                                                                                                                              |                                                                                                         |                                                                                                      |                                                                                  |                                                                                             |                                                                                                    |                                                                                                                                                             |                                                                                                                     |                                                                                 |                                                                                                                       |                                                                                          |                                                                                                         |                                                                                                           |
| <p><b>Family Medicine</b></p>                                                    | <p>PS</p>                                                                                                                                                                                                                 | <p><b>SBP-2 Emphasizes patient safety</b></p> <table border="1"> <thead> <tr> <th>Has not achieved Level 1</th> <th>Level 1</th> <th>Level 2</th> <th>Level 3</th> <th>Level 4</th> <th>Level 5</th> </tr> </thead> <tbody> <tr> <td></td> <td>Understands that medical errors affect patient health and safety, and that their occurrence varies across settings and between providers<br/><br/>Understands that effective team-based care plays a role in patient safety</td> <td>Recognizes medical errors when they occur, including those that do not have adverse outcomes<br/><br/>Understands the mechanisms that cause medical errors<br/><br/>Understands and follows protocols to promote patient safety and prevent medical errors<br/><br/>Participates in effective and safe hand-offs and transitions of care</td> <td>Uses current methods of analysis to identify individual and system causes of medical errors common to family medicine<br/><br/>Develops individual improvement plan and participates in system improvement plans that promote patient safety and prevent medical errors</td> <td>Consistently engages in self-directed and practice improvement activities that seek to identify and address medical errors and patient safety in daily practice<br/><br/>Fosters adherence to patient care protocols amongst team members that enhance patient safety and prevent medical errors</td> <td>Role models self-directed and system improvement activities that seek to continuously anticipate, identify and prevent medical errors to improve patient safety in all practice settings, including the development, use, and promotion of patient care protocols and other tools</td> </tr> </tbody> </table> | Has not achieved Level 1                                                                                                                                                                                                                                              | Level 1                                                                                                                                                                                                                                                                                                                                                                                                                     | Level 2                                                                                                                                                                                                                                                                                      | Level 3 | Level 4 | Level 5 |  | Understands that medical errors affect patient health and safety, and that their occurrence varies across settings and between providers<br><br>Understands that effective team-based care plays a role in patient safety | Recognizes medical errors when they occur, including those that do not have adverse outcomes<br><br>Understands the mechanisms that cause medical errors<br><br>Understands and follows protocols to promote patient safety and prevent medical errors<br><br>Participates in effective and safe hand-offs and transitions of care | Uses current methods of analysis to identify individual and system causes of medical errors common to family medicine<br><br>Develops individual improvement plan and participates in system improvement plans that promote patient safety and prevent medical errors | Consistently engages in self-directed and practice improvement activities that seek to identify and address medical errors and patient safety in daily practice<br><br>Fosters adherence to patient care protocols amongst team members that enhance patient safety and prevent medical errors                                                                                                                              | Role models self-directed and system improvement activities that seek to continuously anticipate, identify and prevent medical errors to improve patient safety in all practice settings, including the development, use, and promotion of patient care protocols and other tools            | <p>CC</p>        | <p><b>Systems-Based Practice 2: System Navigation for Patient-Centered Care</b></p> <table border="1"> <thead> <tr> <th>Level 1</th> <th>Level 2</th> <th>Level 3</th> <th>Level 4</th> <th>Level 5</th> </tr> </thead> <tbody> <tr> <td>Demonstrates knowledge of care coordination</td> <td>Coordinates care of patients in routine clinical situations effectively using the roles of the interprofessional team members</td> <td>Coordinates care of patients in complex clinical situations effectively using the roles of the interprofessional team member</td> <td>Role models effective coordination of patient-centered care among different disciplines and specialties</td> <td>Analyses the process of care coordination and leads in the design and implementation of improvements</td> </tr> <tr> <td>Identifies key elements for safe and effective transitions of care and hand-offs</td> <td>Performs safe and effective transitions of care/hand-offs in routine clinical situations</td> <td>Performs safe and effective transitions of care/hand-offs in complex clinical situations</td> <td>Role models and advocates for safe and effective transitions of care/hand-offs within and across health care delivery systems including outpatient settings</td> <td>Improves quality of transitions of care within and across health care delivery systems to optimize patient outcomes</td> </tr> <tr> <td>Demonstrates knowledge of population and community health needs and disparities</td> <td>Identifies specific population and community health needs and inequities in their local population</td> <td>Uses local resources effectively to meet the needs of a patient population and community</td> <td>Participates in changing and adapting practice to provide for the needs of specific populations</td> <td>Leads innovations and advocates for populations and communities with health care inequities</td> </tr> </tbody> </table> | Level 1 | Level 2 | Level 3 | Level 4 | Level 5 | Demonstrates knowledge of care coordination            | Coordinates care of patients in routine clinical situations effectively using the roles of the interprofessional team members | Coordinates care of patients in complex clinical situations effectively using the roles of the interprofessional team member | Role models effective coordination of patient-centered care among different disciplines and specialties | Analyses the process of care coordination and leads in the design and implementation of improvements | Identifies key elements for safe and effective transitions of care and hand-offs | Performs safe and effective transitions of care/hand-offs in routine clinical situations    | Performs safe and effective transitions of care/hand-offs in complex clinical situations           | Role models and advocates for safe and effective transitions of care/hand-offs within and across health care delivery systems including outpatient settings | Improves quality of transitions of care within and across health care delivery systems to optimize patient outcomes | Demonstrates knowledge of population and community health needs and disparities | Identifies specific population and community health needs and inequities in their local population                    | Uses local resources effectively to meet the needs of a patient population and community | Participates in changing and adapting practice to provide for the needs of specific populations         | Leads innovations and advocates for populations and communities with health care inequities               |
| Has not achieved Level 1                                                         | Level 1                                                                                                                                                                                                                   | Level 2                                                                                                                                                                                                                                                                                                                                                                                                                                                                                                                                                                                                                                                                                                                                                                                                                                                                                                                                                                                                                                                                                                                                                                                                                                                                                                                                                                                                                                                                                                                                                                                                                                                                                                                                         | Level 3                                                                                                                                                                                                                                                               | Level 4                                                                                                                                                                                                                                                                                                                                                                                                                     | Level 5                                                                                                                                                                                                                                                                                      |         |         |         |  |                                                                                                                                                                                                                           |                                                                                                                                                                                                                                                                                                                                    |                                                                                                                                                                                                                                                                       |                                                                                                                                                                                                                                                                                                                                                                                                                             |                                                                                                                                                                                                                                                                                              |                  |                                                                                                                                                                                                                                                                                                                                                                                                                                                                                                                                                                                                                                                                                                                                                                                                                                                                                                                                                                                                                                                                                                                                                                                                                                                                                                                                                                                                                                                                                                                                                                                                                                                                                                                                                                                                                                                                                                                                                                          |         |         |         |         |         |                                                        |                                                                                                                               |                                                                                                                              |                                                                                                         |                                                                                                      |                                                                                  |                                                                                             |                                                                                                    |                                                                                                                                                             |                                                                                                                     |                                                                                 |                                                                                                                       |                                                                                          |                                                                                                         |                                                                                                           |
|                                                                                  | Understands that medical errors affect patient health and safety, and that their occurrence varies across settings and between providers<br><br>Understands that effective team-based care plays a role in patient safety | Recognizes medical errors when they occur, including those that do not have adverse outcomes<br><br>Understands the mechanisms that cause medical errors<br><br>Understands and follows protocols to promote patient safety and prevent medical errors<br><br>Participates in effective and safe hand-offs and transitions of care                                                                                                                                                                                                                                                                                                                                                                                                                                                                                                                                                                                                                                                                                                                                                                                                                                                                                                                                                                                                                                                                                                                                                                                                                                                                                                                                                                                                              | Uses current methods of analysis to identify individual and system causes of medical errors common to family medicine<br><br>Develops individual improvement plan and participates in system improvement plans that promote patient safety and prevent medical errors | Consistently engages in self-directed and practice improvement activities that seek to identify and address medical errors and patient safety in daily practice<br><br>Fosters adherence to patient care protocols amongst team members that enhance patient safety and prevent medical errors                                                                                                                              | Role models self-directed and system improvement activities that seek to continuously anticipate, identify and prevent medical errors to improve patient safety in all practice settings, including the development, use, and promotion of patient care protocols and other tools            |         |         |         |  |                                                                                                                                                                                                                           |                                                                                                                                                                                                                                                                                                                                    |                                                                                                                                                                                                                                                                       |                                                                                                                                                                                                                                                                                                                                                                                                                             |                                                                                                                                                                                                                                                                                              |                  |                                                                                                                                                                                                                                                                                                                                                                                                                                                                                                                                                                                                                                                                                                                                                                                                                                                                                                                                                                                                                                                                                                                                                                                                                                                                                                                                                                                                                                                                                                                                                                                                                                                                                                                                                                                                                                                                                                                                                                          |         |         |         |         |         |                                                        |                                                                                                                               |                                                                                                                              |                                                                                                         |                                                                                                      |                                                                                  |                                                                                             |                                                                                                    |                                                                                                                                                             |                                                                                                                     |                                                                                 |                                                                                                                       |                                                                                          |                                                                                                         |                                                                                                           |
| Level 1                                                                          | Level 2                                                                                                                                                                                                                   | Level 3                                                                                                                                                                                                                                                                                                                                                                                                                                                                                                                                                                                                                                                                                                                                                                                                                                                                                                                                                                                                                                                                                                                                                                                                                                                                                                                                                                                                                                                                                                                                                                                                                                                                                                                                         | Level 4                                                                                                                                                                                                                                                               | Level 5                                                                                                                                                                                                                                                                                                                                                                                                                     |                                                                                                                                                                                                                                                                                              |         |         |         |  |                                                                                                                                                                                                                           |                                                                                                                                                                                                                                                                                                                                    |                                                                                                                                                                                                                                                                       |                                                                                                                                                                                                                                                                                                                                                                                                                             |                                                                                                                                                                                                                                                                                              |                  |                                                                                                                                                                                                                                                                                                                                                                                                                                                                                                                                                                                                                                                                                                                                                                                                                                                                                                                                                                                                                                                                                                                                                                                                                                                                                                                                                                                                                                                                                                                                                                                                                                                                                                                                                                                                                                                                                                                                                                          |         |         |         |         |         |                                                        |                                                                                                                               |                                                                                                                              |                                                                                                         |                                                                                                      |                                                                                  |                                                                                             |                                                                                                    |                                                                                                                                                             |                                                                                                                     |                                                                                 |                                                                                                                       |                                                                                          |                                                                                                         |                                                                                                           |
| Demonstrates knowledge of care coordination                                      | Coordinates care of patients in routine clinical situations effectively using the roles of the interprofessional team members                                                                                             | Coordinates care of patients in complex clinical situations effectively using the roles of the interprofessional team member                                                                                                                                                                                                                                                                                                                                                                                                                                                                                                                                                                                                                                                                                                                                                                                                                                                                                                                                                                                                                                                                                                                                                                                                                                                                                                                                                                                                                                                                                                                                                                                                                    | Role models effective coordination of patient-centered care among different disciplines and specialties                                                                                                                                                               | Analyses the process of care coordination and leads in the design and implementation of improvements                                                                                                                                                                                                                                                                                                                        |                                                                                                                                                                                                                                                                                              |         |         |         |  |                                                                                                                                                                                                                           |                                                                                                                                                                                                                                                                                                                                    |                                                                                                                                                                                                                                                                       |                                                                                                                                                                                                                                                                                                                                                                                                                             |                                                                                                                                                                                                                                                                                              |                  |                                                                                                                                                                                                                                                                                                                                                                                                                                                                                                                                                                                                                                                                                                                                                                                                                                                                                                                                                                                                                                                                                                                                                                                                                                                                                                                                                                                                                                                                                                                                                                                                                                                                                                                                                                                                                                                                                                                                                                          |         |         |         |         |         |                                                        |                                                                                                                               |                                                                                                                              |                                                                                                         |                                                                                                      |                                                                                  |                                                                                             |                                                                                                    |                                                                                                                                                             |                                                                                                                     |                                                                                 |                                                                                                                       |                                                                                          |                                                                                                         |                                                                                                           |
| Identifies key elements for safe and effective transitions of care and hand-offs | Performs safe and effective transitions of care/hand-offs in routine clinical situations                                                                                                                                  | Performs safe and effective transitions of care/hand-offs in complex clinical situations                                                                                                                                                                                                                                                                                                                                                                                                                                                                                                                                                                                                                                                                                                                                                                                                                                                                                                                                                                                                                                                                                                                                                                                                                                                                                                                                                                                                                                                                                                                                                                                                                                                        | Role models and advocates for safe and effective transitions of care/hand-offs within and across health care delivery systems including outpatient settings                                                                                                           | Improves quality of transitions of care within and across health care delivery systems to optimize patient outcomes                                                                                                                                                                                                                                                                                                         |                                                                                                                                                                                                                                                                                              |         |         |         |  |                                                                                                                                                                                                                           |                                                                                                                                                                                                                                                                                                                                    |                                                                                                                                                                                                                                                                       |                                                                                                                                                                                                                                                                                                                                                                                                                             |                                                                                                                                                                                                                                                                                              |                  |                                                                                                                                                                                                                                                                                                                                                                                                                                                                                                                                                                                                                                                                                                                                                                                                                                                                                                                                                                                                                                                                                                                                                                                                                                                                                                                                                                                                                                                                                                                                                                                                                                                                                                                                                                                                                                                                                                                                                                          |         |         |         |         |         |                                                        |                                                                                                                               |                                                                                                                              |                                                                                                         |                                                                                                      |                                                                                  |                                                                                             |                                                                                                    |                                                                                                                                                             |                                                                                                                     |                                                                                 |                                                                                                                       |                                                                                          |                                                                                                         |                                                                                                           |
| Demonstrates knowledge of population and community health needs and disparities  | Identifies specific population and community health needs and inequities in their local population                                                                                                                        | Uses local resources effectively to meet the needs of a patient population and community                                                                                                                                                                                                                                                                                                                                                                                                                                                                                                                                                                                                                                                                                                                                                                                                                                                                                                                                                                                                                                                                                                                                                                                                                                                                                                                                                                                                                                                                                                                                                                                                                                                        | Participates in changing and adapting practice to provide for the needs of specific populations                                                                                                                                                                       | Leads innovations and advocates for populations and communities with health care inequities                                                                                                                                                                                                                                                                                                                                 |                                                                                                                                                                                                                                                                                              |         |         |         |  |                                                                                                                                                                                                                           |                                                                                                                                                                                                                                                                                                                                    |                                                                                                                                                                                                                                                                       |                                                                                                                                                                                                                                                                                                                                                                                                                             |                                                                                                                                                                                                                                                                                              |                  |                                                                                                                                                                                                                                                                                                                                                                                                                                                                                                                                                                                                                                                                                                                                                                                                                                                                                                                                                                                                                                                                                                                                                                                                                                                                                                                                                                                                                                                                                                                                                                                                                                                                                                                                                                                                                                                                                                                                                                          |         |         |         |         |         |                                                        |                                                                                                                               |                                                                                                                              |                                                                                                         |                                                                                                      |                                                                                  |                                                                                             |                                                                                                    |                                                                                                                                                             |                                                                                                                     |                                                                                 |                                                                                                                       |                                                                                          |                                                                                                         |                                                                                                           |

| <p><b>Family Medicine</b></p>                                                                                                                                                      | <p>Advocacy</p>                                                                                                                                                                                                                                                                                                                                                       | <p><b>SBP-3 Advocates for individual and community health</b></p> <table border="1"> <thead> <tr> <th>Has not achieved Level 1</th> <th>Level 1</th> <th>Level 2</th> <th>Level 3</th> <th>Level 4</th> <th>Level 5</th> </tr> </thead> <tbody> <tr> <td></td> <td>Recognizes social context and environment, and how a community's public policy decisions affect individual and community health</td> <td>Recognizes that family physicians can impact community health<br/><br/>Lists ways in which community characteristics and resources affect the health of patients and communities</td> <td>Identifies specific community characteristics that impact specific patients' health<br/><br/>Understands the process of conducting a community strengths and needs assessment</td> <td>Collaborates with other practices, public health, and community-based organizations to educate the public, guide policies, and implement and evaluate community initiatives<br/><br/>Seeks to improve the health care systems in which he or she practices</td> <td>Role-models active involvement in community education and policy change to improve the health of patients and communities</td> </tr> </tbody> </table>                                                                                                                                                                                          | Has not achieved Level 1                                                                                                                                                                                                                                                     | Level 1                                                                                                                                                                                                                                                  | Level 2                                                                                                                   | Level 3                                                                                                                                                                            | Level 4                                                                                                                                                                                                                                                                                                                                                               | Level 5                                                                                                                                                                                                                                                                                                                                                                                                                                                                                                                                                                                                                                         |  | Recognizes social context and environment, and how a community's public policy decisions affect individual and community health      | Recognizes that family physicians can impact community health<br><br>Lists ways in which community characteristics and resources affect the health of patients and communities                          | Identifies specific community characteristics that impact specific patients' health<br><br>Understands the process of conducting a community strengths and needs assessment                                                                                                  | Collaborates with other practices, public health, and community-based organizations to educate the public, guide policies, and implement and evaluate community initiatives<br><br>Seeks to improve the health care systems in which he or she practices | Role-models active involvement in community education and policy change to improve the health of patients and communities | <p>HC Systems</p> | <p><b>Systems-Based Practice 3: Physician Role in Health Care Systems</b></p> <table border="1"> <thead> <tr> <th>Level 1</th> <th>Level 2</th> <th>Level 3</th> <th>Level 4</th> <th>Level 5</th> </tr> </thead> <tbody> <tr> <td>Identifies key components of the complex health care system (e.g., hospital, skilled nursing facility, finance, personnel, technology)</td> <td>Describes how components of a complex health care system are interrelated, and how this impacts patient care</td> <td>Discusses how individual practice affects the broader system (e.g., length of stay, readmission rates, clinical efficiency)</td> <td>Manages various components of the complex health care system to provide efficient and effective patient care and transition of care</td> <td>Advocates for or leads systems change that enhances high-value, efficient, and effective patient care and transition of care</td> </tr> <tr> <td>Describes basic health payment systems, (including government, private, public, uninsured care) and practice models</td> <td>Delivers care with consideration of each patient's payment model (e.g., insurance type)</td> <td>Engages with patients in shared decision making, informed by each patient's payment models</td> <td>Advocates for patient care needs (e.g., community resources, patient assistance resources)</td> <td>Participates in health policy advocacy activities</td> </tr> <tr> <td>Identifies basic knowledge domains for effective transition to practice (e.g., information technology, legal, billing and coding, financial, personnel)</td> <td>Demonstrates use of information technology required for medical practice (e.g., electronic health record, documentation required for billing and coding)</td> <td>Describes core administrative knowledge needed for transition to practice (e.g., contract negotiations, malpractice insurance, government regulation, compliance)</td> <td>Analyzes individual practice patterns and prepares for professional requirements to enter practice</td> <td></td> </tr> </tbody> </table> | Level 1 | Level 2 | Level 3 | Level 4 | Level 5 | Identifies key components of the complex health care system (e.g., hospital, skilled nursing facility, finance, personnel, technology) | Describes how components of a complex health care system are interrelated, and how this impacts patient care | Discusses how individual practice affects the broader system (e.g., length of stay, readmission rates, clinical efficiency) | Manages various components of the complex health care system to provide efficient and effective patient care and transition of care | Advocates for or leads systems change that enhances high-value, efficient, and effective patient care and transition of care     | Describes basic health payment systems, (including government, private, public, uninsured care) and practice models | Delivers care with consideration of each patient's payment model (e.g., insurance type) | Engages with patients in shared decision making, informed by each patient's payment models | Advocates for patient care needs (e.g., community resources, patient assistance resources) | Participates in health policy advocacy activities | Identifies basic knowledge domains for effective transition to practice (e.g., information technology, legal, billing and coding, financial, personnel) | Demonstrates use of information technology required for medical practice (e.g., electronic health record, documentation required for billing and coding) | Describes core administrative knowledge needed for transition to practice (e.g., contract negotiations, malpractice insurance, government regulation, compliance) | Analyzes individual practice patterns and prepares for professional requirements to enter practice |  |
|------------------------------------------------------------------------------------------------------------------------------------------------------------------------------------|-----------------------------------------------------------------------------------------------------------------------------------------------------------------------------------------------------------------------------------------------------------------------------------------------------------------------------------------------------------------------|------------------------------------------------------------------------------------------------------------------------------------------------------------------------------------------------------------------------------------------------------------------------------------------------------------------------------------------------------------------------------------------------------------------------------------------------------------------------------------------------------------------------------------------------------------------------------------------------------------------------------------------------------------------------------------------------------------------------------------------------------------------------------------------------------------------------------------------------------------------------------------------------------------------------------------------------------------------------------------------------------------------------------------------------------------------------------------------------------------------------------------------------------------------------------------------------------------------------------------------------------------------------------------------------------------------------------------------------------------------------------------------------------------------|------------------------------------------------------------------------------------------------------------------------------------------------------------------------------------------------------------------------------------------------------------------------------|----------------------------------------------------------------------------------------------------------------------------------------------------------------------------------------------------------------------------------------------------------|---------------------------------------------------------------------------------------------------------------------------|------------------------------------------------------------------------------------------------------------------------------------------------------------------------------------|-----------------------------------------------------------------------------------------------------------------------------------------------------------------------------------------------------------------------------------------------------------------------------------------------------------------------------------------------------------------------|-------------------------------------------------------------------------------------------------------------------------------------------------------------------------------------------------------------------------------------------------------------------------------------------------------------------------------------------------------------------------------------------------------------------------------------------------------------------------------------------------------------------------------------------------------------------------------------------------------------------------------------------------|--|--------------------------------------------------------------------------------------------------------------------------------------|---------------------------------------------------------------------------------------------------------------------------------------------------------------------------------------------------------|------------------------------------------------------------------------------------------------------------------------------------------------------------------------------------------------------------------------------------------------------------------------------|----------------------------------------------------------------------------------------------------------------------------------------------------------------------------------------------------------------------------------------------------------|---------------------------------------------------------------------------------------------------------------------------|-------------------|-----------------------------------------------------------------------------------------------------------------------------------------------------------------------------------------------------------------------------------------------------------------------------------------------------------------------------------------------------------------------------------------------------------------------------------------------------------------------------------------------------------------------------------------------------------------------------------------------------------------------------------------------------------------------------------------------------------------------------------------------------------------------------------------------------------------------------------------------------------------------------------------------------------------------------------------------------------------------------------------------------------------------------------------------------------------------------------------------------------------------------------------------------------------------------------------------------------------------------------------------------------------------------------------------------------------------------------------------------------------------------------------------------------------------------------------------------------------------------------------------------------------------------------------------------------------------------------------------------------------------------------------------------------------------------------------------------------------------------------------------------------------------------------------------------------------------------------------------------------------------------------------------------------------------------------------------------------------------------------------------------------------------------------------------------------------------------------------------------------------|---------|---------|---------|---------|---------|----------------------------------------------------------------------------------------------------------------------------------------|--------------------------------------------------------------------------------------------------------------|-----------------------------------------------------------------------------------------------------------------------------|-------------------------------------------------------------------------------------------------------------------------------------|----------------------------------------------------------------------------------------------------------------------------------|---------------------------------------------------------------------------------------------------------------------|-----------------------------------------------------------------------------------------|--------------------------------------------------------------------------------------------|--------------------------------------------------------------------------------------------|---------------------------------------------------|---------------------------------------------------------------------------------------------------------------------------------------------------------|----------------------------------------------------------------------------------------------------------------------------------------------------------|-------------------------------------------------------------------------------------------------------------------------------------------------------------------|----------------------------------------------------------------------------------------------------|--|
| Has not achieved Level 1                                                                                                                                                           | Level 1                                                                                                                                                                                                                                                                                                                                                               | Level 2                                                                                                                                                                                                                                                                                                                                                                                                                                                                                                                                                                                                                                                                                                                                                                                                                                                                                                                                                                                                                                                                                                                                                                                                                                                                                                                                                                                                          | Level 3                                                                                                                                                                                                                                                                      | Level 4                                                                                                                                                                                                                                                  | Level 5                                                                                                                   |                                                                                                                                                                                    |                                                                                                                                                                                                                                                                                                                                                                       |                                                                                                                                                                                                                                                                                                                                                                                                                                                                                                                                                                                                                                                 |  |                                                                                                                                      |                                                                                                                                                                                                         |                                                                                                                                                                                                                                                                              |                                                                                                                                                                                                                                                          |                                                                                                                           |                   |                                                                                                                                                                                                                                                                                                                                                                                                                                                                                                                                                                                                                                                                                                                                                                                                                                                                                                                                                                                                                                                                                                                                                                                                                                                                                                                                                                                                                                                                                                                                                                                                                                                                                                                                                                                                                                                                                                                                                                                                                                                                                                                 |         |         |         |         |         |                                                                                                                                        |                                                                                                              |                                                                                                                             |                                                                                                                                     |                                                                                                                                  |                                                                                                                     |                                                                                         |                                                                                            |                                                                                            |                                                   |                                                                                                                                                         |                                                                                                                                                          |                                                                                                                                                                   |                                                                                                    |  |
|                                                                                                                                                                                    | Recognizes social context and environment, and how a community's public policy decisions affect individual and community health                                                                                                                                                                                                                                       | Recognizes that family physicians can impact community health<br><br>Lists ways in which community characteristics and resources affect the health of patients and communities                                                                                                                                                                                                                                                                                                                                                                                                                                                                                                                                                                                                                                                                                                                                                                                                                                                                                                                                                                                                                                                                                                                                                                                                                                   | Identifies specific community characteristics that impact specific patients' health<br><br>Understands the process of conducting a community strengths and needs assessment                                                                                                  | Collaborates with other practices, public health, and community-based organizations to educate the public, guide policies, and implement and evaluate community initiatives<br><br>Seeks to improve the health care systems in which he or she practices | Role-models active involvement in community education and policy change to improve the health of patients and communities |                                                                                                                                                                                    |                                                                                                                                                                                                                                                                                                                                                                       |                                                                                                                                                                                                                                                                                                                                                                                                                                                                                                                                                                                                                                                 |  |                                                                                                                                      |                                                                                                                                                                                                         |                                                                                                                                                                                                                                                                              |                                                                                                                                                                                                                                                          |                                                                                                                           |                   |                                                                                                                                                                                                                                                                                                                                                                                                                                                                                                                                                                                                                                                                                                                                                                                                                                                                                                                                                                                                                                                                                                                                                                                                                                                                                                                                                                                                                                                                                                                                                                                                                                                                                                                                                                                                                                                                                                                                                                                                                                                                                                                 |         |         |         |         |         |                                                                                                                                        |                                                                                                              |                                                                                                                             |                                                                                                                                     |                                                                                                                                  |                                                                                                                     |                                                                                         |                                                                                            |                                                                                            |                                                   |                                                                                                                                                         |                                                                                                                                                          |                                                                                                                                                                   |                                                                                                    |  |
| Level 1                                                                                                                                                                            | Level 2                                                                                                                                                                                                                                                                                                                                                               | Level 3                                                                                                                                                                                                                                                                                                                                                                                                                                                                                                                                                                                                                                                                                                                                                                                                                                                                                                                                                                                                                                                                                                                                                                                                                                                                                                                                                                                                          | Level 4                                                                                                                                                                                                                                                                      | Level 5                                                                                                                                                                                                                                                  |                                                                                                                           |                                                                                                                                                                                    |                                                                                                                                                                                                                                                                                                                                                                       |                                                                                                                                                                                                                                                                                                                                                                                                                                                                                                                                                                                                                                                 |  |                                                                                                                                      |                                                                                                                                                                                                         |                                                                                                                                                                                                                                                                              |                                                                                                                                                                                                                                                          |                                                                                                                           |                   |                                                                                                                                                                                                                                                                                                                                                                                                                                                                                                                                                                                                                                                                                                                                                                                                                                                                                                                                                                                                                                                                                                                                                                                                                                                                                                                                                                                                                                                                                                                                                                                                                                                                                                                                                                                                                                                                                                                                                                                                                                                                                                                 |         |         |         |         |         |                                                                                                                                        |                                                                                                              |                                                                                                                             |                                                                                                                                     |                                                                                                                                  |                                                                                                                     |                                                                                         |                                                                                            |                                                                                            |                                                   |                                                                                                                                                         |                                                                                                                                                          |                                                                                                                                                                   |                                                                                                    |  |
| Identifies key components of the complex health care system (e.g., hospital, skilled nursing facility, finance, personnel, technology)                                             | Describes how components of a complex health care system are interrelated, and how this impacts patient care                                                                                                                                                                                                                                                          | Discusses how individual practice affects the broader system (e.g., length of stay, readmission rates, clinical efficiency)                                                                                                                                                                                                                                                                                                                                                                                                                                                                                                                                                                                                                                                                                                                                                                                                                                                                                                                                                                                                                                                                                                                                                                                                                                                                                      | Manages various components of the complex health care system to provide efficient and effective patient care and transition of care                                                                                                                                          | Advocates for or leads systems change that enhances high-value, efficient, and effective patient care and transition of care                                                                                                                             |                                                                                                                           |                                                                                                                                                                                    |                                                                                                                                                                                                                                                                                                                                                                       |                                                                                                                                                                                                                                                                                                                                                                                                                                                                                                                                                                                                                                                 |  |                                                                                                                                      |                                                                                                                                                                                                         |                                                                                                                                                                                                                                                                              |                                                                                                                                                                                                                                                          |                                                                                                                           |                   |                                                                                                                                                                                                                                                                                                                                                                                                                                                                                                                                                                                                                                                                                                                                                                                                                                                                                                                                                                                                                                                                                                                                                                                                                                                                                                                                                                                                                                                                                                                                                                                                                                                                                                                                                                                                                                                                                                                                                                                                                                                                                                                 |         |         |         |         |         |                                                                                                                                        |                                                                                                              |                                                                                                                             |                                                                                                                                     |                                                                                                                                  |                                                                                                                     |                                                                                         |                                                                                            |                                                                                            |                                                   |                                                                                                                                                         |                                                                                                                                                          |                                                                                                                                                                   |                                                                                                    |  |
| Describes basic health payment systems, (including government, private, public, uninsured care) and practice models                                                                | Delivers care with consideration of each patient's payment model (e.g., insurance type)                                                                                                                                                                                                                                                                               | Engages with patients in shared decision making, informed by each patient's payment models                                                                                                                                                                                                                                                                                                                                                                                                                                                                                                                                                                                                                                                                                                                                                                                                                                                                                                                                                                                                                                                                                                                                                                                                                                                                                                                       | Advocates for patient care needs (e.g., community resources, patient assistance resources)                                                                                                                                                                                   | Participates in health policy advocacy activities                                                                                                                                                                                                        |                                                                                                                           |                                                                                                                                                                                    |                                                                                                                                                                                                                                                                                                                                                                       |                                                                                                                                                                                                                                                                                                                                                                                                                                                                                                                                                                                                                                                 |  |                                                                                                                                      |                                                                                                                                                                                                         |                                                                                                                                                                                                                                                                              |                                                                                                                                                                                                                                                          |                                                                                                                           |                   |                                                                                                                                                                                                                                                                                                                                                                                                                                                                                                                                                                                                                                                                                                                                                                                                                                                                                                                                                                                                                                                                                                                                                                                                                                                                                                                                                                                                                                                                                                                                                                                                                                                                                                                                                                                                                                                                                                                                                                                                                                                                                                                 |         |         |         |         |         |                                                                                                                                        |                                                                                                              |                                                                                                                             |                                                                                                                                     |                                                                                                                                  |                                                                                                                     |                                                                                         |                                                                                            |                                                                                            |                                                   |                                                                                                                                                         |                                                                                                                                                          |                                                                                                                                                                   |                                                                                                    |  |
| Identifies basic knowledge domains for effective transition to practice (e.g., information technology, legal, billing and coding, financial, personnel)                            | Demonstrates use of information technology required for medical practice (e.g., electronic health record, documentation required for billing and coding)                                                                                                                                                                                                              | Describes core administrative knowledge needed for transition to practice (e.g., contract negotiations, malpractice insurance, government regulation, compliance)                                                                                                                                                                                                                                                                                                                                                                                                                                                                                                                                                                                                                                                                                                                                                                                                                                                                                                                                                                                                                                                                                                                                                                                                                                                | Analyzes individual practice patterns and prepares for professional requirements to enter practice                                                                                                                                                                           |                                                                                                                                                                                                                                                          |                                                                                                                           |                                                                                                                                                                                    |                                                                                                                                                                                                                                                                                                                                                                       |                                                                                                                                                                                                                                                                                                                                                                                                                                                                                                                                                                                                                                                 |  |                                                                                                                                      |                                                                                                                                                                                                         |                                                                                                                                                                                                                                                                              |                                                                                                                                                                                                                                                          |                                                                                                                           |                   |                                                                                                                                                                                                                                                                                                                                                                                                                                                                                                                                                                                                                                                                                                                                                                                                                                                                                                                                                                                                                                                                                                                                                                                                                                                                                                                                                                                                                                                                                                                                                                                                                                                                                                                                                                                                                                                                                                                                                                                                                                                                                                                 |         |         |         |         |         |                                                                                                                                        |                                                                                                              |                                                                                                                             |                                                                                                                                     |                                                                                                                                  |                                                                                                                     |                                                                                         |                                                                                            |                                                                                            |                                                   |                                                                                                                                                         |                                                                                                                                                          |                                                                                                                                                                   |                                                                                                    |  |
| <p><b>Family Medicine</b></p>                                                                                                                                                      | <p>CC</p>                                                                                                                                                                                                                                                                                                                                                             | <p><b>SBP-4 Coordinates team-based care</b></p> <table border="1"> <thead> <tr> <th>Has not achieved Level 1</th> <th>Level 1</th> <th>Level 2</th> <th>Level 3</th> <th>Level 4</th> <th>Level 5</th> </tr> </thead> <tbody> <tr> <td></td> <td>Understands that quality patient care requires coordination and teamwork, and participates as a respectful and effective team member</td> <td>Understands the roles and responsibilities of oneself, patients, families, consultants, and interprofessional team members needed to optimize care, and accepts responsibility for coordination of care</td> <td>Engages the appropriate care team to provide accountable, team-based, coordinated care centered on individual patient needs<br/><br/>Assumes responsibility for seamless transitions of care<br/><br/>Sustains a relationship as a personal physician to his or her own patients</td> <td>Accepts responsibility for the coordination of care, and directs appropriate teams to optimize the health of patients</td> <td>Role models leadership, integration, and optimization of care teams to provide quality, individualized patient care</td> </tr> </tbody> </table>                                                                                                                                                                                                                        | Has not achieved Level 1                                                                                                                                                                                                                                                     | Level 1                                                                                                                                                                                                                                                  | Level 2                                                                                                                   | Level 3                                                                                                                                                                            | Level 4                                                                                                                                                                                                                                                                                                                                                               | Level 5                                                                                                                                                                                                                                                                                                                                                                                                                                                                                                                                                                                                                                         |  | Understands that quality patient care requires coordination and teamwork, and participates as a respectful and effective team member | Understands the roles and responsibilities of oneself, patients, families, consultants, and interprofessional team members needed to optimize care, and accepts responsibility for coordination of care | Engages the appropriate care team to provide accountable, team-based, coordinated care centered on individual patient needs<br><br>Assumes responsibility for seamless transitions of care<br><br>Sustains a relationship as a personal physician to his or her own patients | Accepts responsibility for the coordination of care, and directs appropriate teams to optimize the health of patients                                                                                                                                    | Role models leadership, integration, and optimization of care teams to provide quality, individualized patient care       | <p>Advocacy</p>   | <p><b>Systems-Based Practice 4: Advocacy</b></p> <table border="1"> <thead> <tr> <th>Level 1</th> <th>Level 2</th> <th>Level 3</th> <th>Level 4</th> <th>Level 5</th> </tr> </thead> <tbody> <tr> <td>Identifies that advocating for patient populations is a professional responsibility</td> <td>Identifies that advocating for family medicine is a professional responsibility</td> <td>Describes how stakeholders influence and are affected by health policy at the local, state, and federal level</td> <td>Accesses advocacy tools and other resources needed to achieve (or prevent a deleterious) policy change</td> <td>Develops a relationship with stakeholders that advances or prevents a policy change that improves individual or community health</td> </tr> </tbody> </table>                                                                                                                                                                                                                                                                                                                                                                                                                                                                                                                                                                                                                                                                                                                                                                                                                                                                                                                                                                                                                                                                                                                                                                                                                                                                                                                | Level 1 | Level 2 | Level 3 | Level 4 | Level 5 | Identifies that advocating for patient populations is a professional responsibility                                                    | Identifies that advocating for family medicine is a professional responsibility                              | Describes how stakeholders influence and are affected by health policy at the local, state, and federal level               | Accesses advocacy tools and other resources needed to achieve (or prevent a deleterious) policy change                              | Develops a relationship with stakeholders that advances or prevents a policy change that improves individual or community health |                                                                                                                     |                                                                                         |                                                                                            |                                                                                            |                                                   |                                                                                                                                                         |                                                                                                                                                          |                                                                                                                                                                   |                                                                                                    |  |
| Has not achieved Level 1                                                                                                                                                           | Level 1                                                                                                                                                                                                                                                                                                                                                               | Level 2                                                                                                                                                                                                                                                                                                                                                                                                                                                                                                                                                                                                                                                                                                                                                                                                                                                                                                                                                                                                                                                                                                                                                                                                                                                                                                                                                                                                          | Level 3                                                                                                                                                                                                                                                                      | Level 4                                                                                                                                                                                                                                                  | Level 5                                                                                                                   |                                                                                                                                                                                    |                                                                                                                                                                                                                                                                                                                                                                       |                                                                                                                                                                                                                                                                                                                                                                                                                                                                                                                                                                                                                                                 |  |                                                                                                                                      |                                                                                                                                                                                                         |                                                                                                                                                                                                                                                                              |                                                                                                                                                                                                                                                          |                                                                                                                           |                   |                                                                                                                                                                                                                                                                                                                                                                                                                                                                                                                                                                                                                                                                                                                                                                                                                                                                                                                                                                                                                                                                                                                                                                                                                                                                                                                                                                                                                                                                                                                                                                                                                                                                                                                                                                                                                                                                                                                                                                                                                                                                                                                 |         |         |         |         |         |                                                                                                                                        |                                                                                                              |                                                                                                                             |                                                                                                                                     |                                                                                                                                  |                                                                                                                     |                                                                                         |                                                                                            |                                                                                            |                                                   |                                                                                                                                                         |                                                                                                                                                          |                                                                                                                                                                   |                                                                                                    |  |
|                                                                                                                                                                                    | Understands that quality patient care requires coordination and teamwork, and participates as a respectful and effective team member                                                                                                                                                                                                                                  | Understands the roles and responsibilities of oneself, patients, families, consultants, and interprofessional team members needed to optimize care, and accepts responsibility for coordination of care                                                                                                                                                                                                                                                                                                                                                                                                                                                                                                                                                                                                                                                                                                                                                                                                                                                                                                                                                                                                                                                                                                                                                                                                          | Engages the appropriate care team to provide accountable, team-based, coordinated care centered on individual patient needs<br><br>Assumes responsibility for seamless transitions of care<br><br>Sustains a relationship as a personal physician to his or her own patients | Accepts responsibility for the coordination of care, and directs appropriate teams to optimize the health of patients                                                                                                                                    | Role models leadership, integration, and optimization of care teams to provide quality, individualized patient care       |                                                                                                                                                                                    |                                                                                                                                                                                                                                                                                                                                                                       |                                                                                                                                                                                                                                                                                                                                                                                                                                                                                                                                                                                                                                                 |  |                                                                                                                                      |                                                                                                                                                                                                         |                                                                                                                                                                                                                                                                              |                                                                                                                                                                                                                                                          |                                                                                                                           |                   |                                                                                                                                                                                                                                                                                                                                                                                                                                                                                                                                                                                                                                                                                                                                                                                                                                                                                                                                                                                                                                                                                                                                                                                                                                                                                                                                                                                                                                                                                                                                                                                                                                                                                                                                                                                                                                                                                                                                                                                                                                                                                                                 |         |         |         |         |         |                                                                                                                                        |                                                                                                              |                                                                                                                             |                                                                                                                                     |                                                                                                                                  |                                                                                                                     |                                                                                         |                                                                                            |                                                                                            |                                                   |                                                                                                                                                         |                                                                                                                                                          |                                                                                                                                                                   |                                                                                                    |  |
| Level 1                                                                                                                                                                            | Level 2                                                                                                                                                                                                                                                                                                                                                               | Level 3                                                                                                                                                                                                                                                                                                                                                                                                                                                                                                                                                                                                                                                                                                                                                                                                                                                                                                                                                                                                                                                                                                                                                                                                                                                                                                                                                                                                          | Level 4                                                                                                                                                                                                                                                                      | Level 5                                                                                                                                                                                                                                                  |                                                                                                                           |                                                                                                                                                                                    |                                                                                                                                                                                                                                                                                                                                                                       |                                                                                                                                                                                                                                                                                                                                                                                                                                                                                                                                                                                                                                                 |  |                                                                                                                                      |                                                                                                                                                                                                         |                                                                                                                                                                                                                                                                              |                                                                                                                                                                                                                                                          |                                                                                                                           |                   |                                                                                                                                                                                                                                                                                                                                                                                                                                                                                                                                                                                                                                                                                                                                                                                                                                                                                                                                                                                                                                                                                                                                                                                                                                                                                                                                                                                                                                                                                                                                                                                                                                                                                                                                                                                                                                                                                                                                                                                                                                                                                                                 |         |         |         |         |         |                                                                                                                                        |                                                                                                              |                                                                                                                             |                                                                                                                                     |                                                                                                                                  |                                                                                                                     |                                                                                         |                                                                                            |                                                                                            |                                                   |                                                                                                                                                         |                                                                                                                                                          |                                                                                                                                                                   |                                                                                                    |  |
| Identifies that advocating for patient populations is a professional responsibility                                                                                                | Identifies that advocating for family medicine is a professional responsibility                                                                                                                                                                                                                                                                                       | Describes how stakeholders influence and are affected by health policy at the local, state, and federal level                                                                                                                                                                                                                                                                                                                                                                                                                                                                                                                                                                                                                                                                                                                                                                                                                                                                                                                                                                                                                                                                                                                                                                                                                                                                                                    | Accesses advocacy tools and other resources needed to achieve (or prevent a deleterious) policy change                                                                                                                                                                       | Develops a relationship with stakeholders that advances or prevents a policy change that improves individual or community health                                                                                                                         |                                                                                                                           |                                                                                                                                                                                    |                                                                                                                                                                                                                                                                                                                                                                       |                                                                                                                                                                                                                                                                                                                                                                                                                                                                                                                                                                                                                                                 |  |                                                                                                                                      |                                                                                                                                                                                                         |                                                                                                                                                                                                                                                                              |                                                                                                                                                                                                                                                          |                                                                                                                           |                   |                                                                                                                                                                                                                                                                                                                                                                                                                                                                                                                                                                                                                                                                                                                                                                                                                                                                                                                                                                                                                                                                                                                                                                                                                                                                                                                                                                                                                                                                                                                                                                                                                                                                                                                                                                                                                                                                                                                                                                                                                                                                                                                 |         |         |         |         |         |                                                                                                                                        |                                                                                                              |                                                                                                                             |                                                                                                                                     |                                                                                                                                  |                                                                                                                     |                                                                                         |                                                                                            |                                                                                            |                                                   |                                                                                                                                                         |                                                                                                                                                          |                                                                                                                                                                   |                                                                                                    |  |
| <p><b>Internal Medicine</b></p>                                                                                                                                                    | <p>Teams</p>                                                                                                                                                                                                                                                                                                                                                          | <p><b>8. Works effectively within an interprofessional team (e.g. peers, consultants, nursing, ancillary professionals and other support personnel). (SBP1)</b></p> <table border="1"> <thead> <tr> <th>Critical Deficiencies</th> <th>Ready for unsupervised practice</th> <th>Aspirational</th> </tr> </thead> <tbody> <tr> <td>Refuses to recognize the contributions of other interprofessional team members<br/><br/>Frustrates team members with inefficiency and errors</td> <td>Identifies roles of other team members but does not recognize how/when to utilize them as resources<br/><br/>Frequently requires reminders from team to complete physician responsibilities (e.g. talk to family, enter orders)</td> <td>Understands the roles and responsibilities of all team members but uses them ineffectively<br/><br/>Participates in team discussions when required but does not actively seek input from other team members<br/><br/>Actively engages in team meetings and collaborative decision-making<br/><br/>Efficiently coordinates activities of other team members to optimize care<br/><br/>Viewed by other team members as a leader in the delivery of high quality care</td> </tr> </tbody> </table>                                                                                                                                                                                 | Critical Deficiencies                                                                                                                                                                                                                                                        | Ready for unsupervised practice                                                                                                                                                                                                                          | Aspirational                                                                                                              | Refuses to recognize the contributions of other interprofessional team members<br><br>Frustrates team members with inefficiency and errors                                         | Identifies roles of other team members but does not recognize how/when to utilize them as resources<br><br>Frequently requires reminders from team to complete physician responsibilities (e.g. talk to family, enter orders)                                                                                                                                         | Understands the roles and responsibilities of all team members but uses them ineffectively<br><br>Participates in team discussions when required but does not actively seek input from other team members<br><br>Actively engages in team meetings and collaborative decision-making<br><br>Efficiently coordinates activities of other team members to optimize care<br><br>Viewed by other team members as a leader in the delivery of high quality care                                                                                                                                                                                      |  |                                                                                                                                      |                                                                                                                                                                                                         |                                                                                                                                                                                                                                                                              |                                                                                                                                                                                                                                                          |                                                                                                                           |                   |                                                                                                                                                                                                                                                                                                                                                                                                                                                                                                                                                                                                                                                                                                                                                                                                                                                                                                                                                                                                                                                                                                                                                                                                                                                                                                                                                                                                                                                                                                                                                                                                                                                                                                                                                                                                                                                                                                                                                                                                                                                                                                                 |         |         |         |         |         |                                                                                                                                        |                                                                                                              |                                                                                                                             |                                                                                                                                     |                                                                                                                                  |                                                                                                                     |                                                                                         |                                                                                            |                                                                                            |                                                   |                                                                                                                                                         |                                                                                                                                                          |                                                                                                                                                                   |                                                                                                    |  |
| Critical Deficiencies                                                                                                                                                              | Ready for unsupervised practice                                                                                                                                                                                                                                                                                                                                       | Aspirational                                                                                                                                                                                                                                                                                                                                                                                                                                                                                                                                                                                                                                                                                                                                                                                                                                                                                                                                                                                                                                                                                                                                                                                                                                                                                                                                                                                                     |                                                                                                                                                                                                                                                                              |                                                                                                                                                                                                                                                          |                                                                                                                           |                                                                                                                                                                                    |                                                                                                                                                                                                                                                                                                                                                                       |                                                                                                                                                                                                                                                                                                                                                                                                                                                                                                                                                                                                                                                 |  |                                                                                                                                      |                                                                                                                                                                                                         |                                                                                                                                                                                                                                                                              |                                                                                                                                                                                                                                                          |                                                                                                                           |                   |                                                                                                                                                                                                                                                                                                                                                                                                                                                                                                                                                                                                                                                                                                                                                                                                                                                                                                                                                                                                                                                                                                                                                                                                                                                                                                                                                                                                                                                                                                                                                                                                                                                                                                                                                                                                                                                                                                                                                                                                                                                                                                                 |         |         |         |         |         |                                                                                                                                        |                                                                                                              |                                                                                                                             |                                                                                                                                     |                                                                                                                                  |                                                                                                                     |                                                                                         |                                                                                            |                                                                                            |                                                   |                                                                                                                                                         |                                                                                                                                                          |                                                                                                                                                                   |                                                                                                    |  |
| Refuses to recognize the contributions of other interprofessional team members<br><br>Frustrates team members with inefficiency and errors                                         | Identifies roles of other team members but does not recognize how/when to utilize them as resources<br><br>Frequently requires reminders from team to complete physician responsibilities (e.g. talk to family, enter orders)                                                                                                                                         | Understands the roles and responsibilities of all team members but uses them ineffectively<br><br>Participates in team discussions when required but does not actively seek input from other team members<br><br>Actively engages in team meetings and collaborative decision-making<br><br>Efficiently coordinates activities of other team members to optimize care<br><br>Viewed by other team members as a leader in the delivery of high quality care                                                                                                                                                                                                                                                                                                                                                                                                                                                                                                                                                                                                                                                                                                                                                                                                                                                                                                                                                       |                                                                                                                                                                                                                                                                              |                                                                                                                                                                                                                                                          |                                                                                                                           |                                                                                                                                                                                    |                                                                                                                                                                                                                                                                                                                                                                       |                                                                                                                                                                                                                                                                                                                                                                                                                                                                                                                                                                                                                                                 |  |                                                                                                                                      |                                                                                                                                                                                                         |                                                                                                                                                                                                                                                                              |                                                                                                                                                                                                                                                          |                                                                                                                           |                   |                                                                                                                                                                                                                                                                                                                                                                                                                                                                                                                                                                                                                                                                                                                                                                                                                                                                                                                                                                                                                                                                                                                                                                                                                                                                                                                                                                                                                                                                                                                                                                                                                                                                                                                                                                                                                                                                                                                                                                                                                                                                                                                 |         |         |         |         |         |                                                                                                                                        |                                                                                                              |                                                                                                                             |                                                                                                                                     |                                                                                                                                  |                                                                                                                     |                                                                                         |                                                                                            |                                                                                            |                                                   |                                                                                                                                                         |                                                                                                                                                          |                                                                                                                                                                   |                                                                                                    |  |
| <p><b>Internal Medicine</b></p>                                                                                                                                                    | <p>PS</p>                                                                                                                                                                                                                                                                                                                                                             | <p><b>9. Recognizes system error and advocates for system improvement. (SBP2)</b></p> <table border="1"> <thead> <tr> <th>Critical Deficiencies</th> <th>Ready for unsupervised practice</th> <th>Aspirational</th> </tr> </thead> <tbody> <tr> <td>Ignores a risk for error within the system that may impact the care of a patient<br/><br/>Ignores feedback and is unwilling to change behavior in order to reduce the risk for error</td> <td>Does not recognize the potential for system error<br/><br/>Makes decisions that could lead to error which are otherwise corrected by the system or supervision<br/><br/>Resistant to feedback about decisions that may lead to error or otherwise cause harm</td> <td>Recognizes the potential for error within the system<br/><br/>Identifies obvious or critical causes of error and notifies supervisor accordingly<br/><br/>Recognizes the potential risk for error in the immediate system and takes necessary steps to mitigate that risk<br/><br/>Willing to receive feedback about decisions that may lead to error or otherwise cause harm<br/><br/>Advocates for safe patient care and optimal patient care systems<br/><br/>Activates formal system resources to investigate and mitigate real or potential medical error<br/><br/>Reflects upon and learns from own critical incidents that may lead to medical error</td> </tr> </tbody> </table> | Critical Deficiencies                                                                                                                                                                                                                                                        | Ready for unsupervised practice                                                                                                                                                                                                                          | Aspirational                                                                                                              | Ignores a risk for error within the system that may impact the care of a patient<br><br>Ignores feedback and is unwilling to change behavior in order to reduce the risk for error | Does not recognize the potential for system error<br><br>Makes decisions that could lead to error which are otherwise corrected by the system or supervision<br><br>Resistant to feedback about decisions that may lead to error or otherwise cause harm                                                                                                              | Recognizes the potential for error within the system<br><br>Identifies obvious or critical causes of error and notifies supervisor accordingly<br><br>Recognizes the potential risk for error in the immediate system and takes necessary steps to mitigate that risk<br><br>Willing to receive feedback about decisions that may lead to error or otherwise cause harm<br><br>Advocates for safe patient care and optimal patient care systems<br><br>Activates formal system resources to investigate and mitigate real or potential medical error<br><br>Reflects upon and learns from own critical incidents that may lead to medical error |  |                                                                                                                                      |                                                                                                                                                                                                         |                                                                                                                                                                                                                                                                              |                                                                                                                                                                                                                                                          |                                                                                                                           |                   |                                                                                                                                                                                                                                                                                                                                                                                                                                                                                                                                                                                                                                                                                                                                                                                                                                                                                                                                                                                                                                                                                                                                                                                                                                                                                                                                                                                                                                                                                                                                                                                                                                                                                                                                                                                                                                                                                                                                                                                                                                                                                                                 |         |         |         |         |         |                                                                                                                                        |                                                                                                              |                                                                                                                             |                                                                                                                                     |                                                                                                                                  |                                                                                                                     |                                                                                         |                                                                                            |                                                                                            |                                                   |                                                                                                                                                         |                                                                                                                                                          |                                                                                                                                                                   |                                                                                                    |  |
| Critical Deficiencies                                                                                                                                                              | Ready for unsupervised practice                                                                                                                                                                                                                                                                                                                                       | Aspirational                                                                                                                                                                                                                                                                                                                                                                                                                                                                                                                                                                                                                                                                                                                                                                                                                                                                                                                                                                                                                                                                                                                                                                                                                                                                                                                                                                                                     |                                                                                                                                                                                                                                                                              |                                                                                                                                                                                                                                                          |                                                                                                                           |                                                                                                                                                                                    |                                                                                                                                                                                                                                                                                                                                                                       |                                                                                                                                                                                                                                                                                                                                                                                                                                                                                                                                                                                                                                                 |  |                                                                                                                                      |                                                                                                                                                                                                         |                                                                                                                                                                                                                                                                              |                                                                                                                                                                                                                                                          |                                                                                                                           |                   |                                                                                                                                                                                                                                                                                                                                                                                                                                                                                                                                                                                                                                                                                                                                                                                                                                                                                                                                                                                                                                                                                                                                                                                                                                                                                                                                                                                                                                                                                                                                                                                                                                                                                                                                                                                                                                                                                                                                                                                                                                                                                                                 |         |         |         |         |         |                                                                                                                                        |                                                                                                              |                                                                                                                             |                                                                                                                                     |                                                                                                                                  |                                                                                                                     |                                                                                         |                                                                                            |                                                                                            |                                                   |                                                                                                                                                         |                                                                                                                                                          |                                                                                                                                                                   |                                                                                                    |  |
| Ignores a risk for error within the system that may impact the care of a patient<br><br>Ignores feedback and is unwilling to change behavior in order to reduce the risk for error | Does not recognize the potential for system error<br><br>Makes decisions that could lead to error which are otherwise corrected by the system or supervision<br><br>Resistant to feedback about decisions that may lead to error or otherwise cause harm                                                                                                              | Recognizes the potential for error within the system<br><br>Identifies obvious or critical causes of error and notifies supervisor accordingly<br><br>Recognizes the potential risk for error in the immediate system and takes necessary steps to mitigate that risk<br><br>Willing to receive feedback about decisions that may lead to error or otherwise cause harm<br><br>Advocates for safe patient care and optimal patient care systems<br><br>Activates formal system resources to investigate and mitigate real or potential medical error<br><br>Reflects upon and learns from own critical incidents that may lead to medical error                                                                                                                                                                                                                                                                                                                                                                                                                                                                                                                                                                                                                                                                                                                                                                  |                                                                                                                                                                                                                                                                              |                                                                                                                                                                                                                                                          |                                                                                                                           |                                                                                                                                                                                    |                                                                                                                                                                                                                                                                                                                                                                       |                                                                                                                                                                                                                                                                                                                                                                                                                                                                                                                                                                                                                                                 |  |                                                                                                                                      |                                                                                                                                                                                                         |                                                                                                                                                                                                                                                                              |                                                                                                                                                                                                                                                          |                                                                                                                           |                   |                                                                                                                                                                                                                                                                                                                                                                                                                                                                                                                                                                                                                                                                                                                                                                                                                                                                                                                                                                                                                                                                                                                                                                                                                                                                                                                                                                                                                                                                                                                                                                                                                                                                                                                                                                                                                                                                                                                                                                                                                                                                                                                 |         |         |         |         |         |                                                                                                                                        |                                                                                                              |                                                                                                                             |                                                                                                                                     |                                                                                                                                  |                                                                                                                     |                                                                                         |                                                                                            |                                                                                            |                                                   |                                                                                                                                                         |                                                                                                                                                          |                                                                                                                                                                   |                                                                                                    |  |
| <p><b>Internal Medicine</b></p>                                                                                                                                                    | <p>HC Costs</p>                                                                                                                                                                                                                                                                                                                                                       | <p><b>10. Identifies forces that impact the cost of health care, and advocates for, and practices cost-effective care. (SBP3)</b></p> <table border="1"> <thead> <tr> <th>Critical Deficiencies</th> <th>Ready for unsupervised practice</th> <th>Aspirational</th> </tr> </thead> <tbody> <tr> <td>Ignores cost issues in the provision of care<br/><br/>Demonstrates no effort to overcome barriers to cost-effective care</td> <td>Lacks awareness of external factors (e.g. socio-economic, cultural, literacy, insurance status) that impact the cost of health care and the role that external stakeholders (e.g. providers, suppliers, financiers, purchasers) have on the cost of care<br/><br/>Does not consider limited health care resources when ordering diagnostic or therapeutic interventions</td> <td>Recognizes that external factors influence a patient's utilization of health care and may act as barriers to cost-effective care<br/><br/>Minimizes unnecessary diagnostic and therapeutic tests<br/><br/>Possesses an incomplete understanding of cost-awareness principles for a population of patients (e.g. screening tests)</td> </tr> </tbody> </table>                                                                                                                                                                                                                             | Critical Deficiencies                                                                                                                                                                                                                                                        | Ready for unsupervised practice                                                                                                                                                                                                                          | Aspirational                                                                                                              | Ignores cost issues in the provision of care<br><br>Demonstrates no effort to overcome barriers to cost-effective care                                                             | Lacks awareness of external factors (e.g. socio-economic, cultural, literacy, insurance status) that impact the cost of health care and the role that external stakeholders (e.g. providers, suppliers, financiers, purchasers) have on the cost of care<br><br>Does not consider limited health care resources when ordering diagnostic or therapeutic interventions | Recognizes that external factors influence a patient's utilization of health care and may act as barriers to cost-effective care<br><br>Minimizes unnecessary diagnostic and therapeutic tests<br><br>Possesses an incomplete understanding of cost-awareness principles for a population of patients (e.g. screening tests)                                                                                                                                                                                                                                                                                                                    |  |                                                                                                                                      |                                                                                                                                                                                                         |                                                                                                                                                                                                                                                                              |                                                                                                                                                                                                                                                          |                                                                                                                           |                   |                                                                                                                                                                                                                                                                                                                                                                                                                                                                                                                                                                                                                                                                                                                                                                                                                                                                                                                                                                                                                                                                                                                                                                                                                                                                                                                                                                                                                                                                                                                                                                                                                                                                                                                                                                                                                                                                                                                                                                                                                                                                                                                 |         |         |         |         |         |                                                                                                                                        |                                                                                                              |                                                                                                                             |                                                                                                                                     |                                                                                                                                  |                                                                                                                     |                                                                                         |                                                                                            |                                                                                            |                                                   |                                                                                                                                                         |                                                                                                                                                          |                                                                                                                                                                   |                                                                                                    |  |
| Critical Deficiencies                                                                                                                                                              | Ready for unsupervised practice                                                                                                                                                                                                                                                                                                                                       | Aspirational                                                                                                                                                                                                                                                                                                                                                                                                                                                                                                                                                                                                                                                                                                                                                                                                                                                                                                                                                                                                                                                                                                                                                                                                                                                                                                                                                                                                     |                                                                                                                                                                                                                                                                              |                                                                                                                                                                                                                                                          |                                                                                                                           |                                                                                                                                                                                    |                                                                                                                                                                                                                                                                                                                                                                       |                                                                                                                                                                                                                                                                                                                                                                                                                                                                                                                                                                                                                                                 |  |                                                                                                                                      |                                                                                                                                                                                                         |                                                                                                                                                                                                                                                                              |                                                                                                                                                                                                                                                          |                                                                                                                           |                   |                                                                                                                                                                                                                                                                                                                                                                                                                                                                                                                                                                                                                                                                                                                                                                                                                                                                                                                                                                                                                                                                                                                                                                                                                                                                                                                                                                                                                                                                                                                                                                                                                                                                                                                                                                                                                                                                                                                                                                                                                                                                                                                 |         |         |         |         |         |                                                                                                                                        |                                                                                                              |                                                                                                                             |                                                                                                                                     |                                                                                                                                  |                                                                                                                     |                                                                                         |                                                                                            |                                                                                            |                                                   |                                                                                                                                                         |                                                                                                                                                          |                                                                                                                                                                   |                                                                                                    |  |
| Ignores cost issues in the provision of care<br><br>Demonstrates no effort to overcome barriers to cost-effective care                                                             | Lacks awareness of external factors (e.g. socio-economic, cultural, literacy, insurance status) that impact the cost of health care and the role that external stakeholders (e.g. providers, suppliers, financiers, purchasers) have on the cost of care<br><br>Does not consider limited health care resources when ordering diagnostic or therapeutic interventions | Recognizes that external factors influence a patient's utilization of health care and may act as barriers to cost-effective care<br><br>Minimizes unnecessary diagnostic and therapeutic tests<br><br>Possesses an incomplete understanding of cost-awareness principles for a population of patients (e.g. screening tests)                                                                                                                                                                                                                                                                                                                                                                                                                                                                                                                                                                                                                                                                                                                                                                                                                                                                                                                                                                                                                                                                                     |                                                                                                                                                                                                                                                                              |                                                                                                                                                                                                                                                          |                                                                                                                           |                                                                                                                                                                                    |                                                                                                                                                                                                                                                                                                                                                                       |                                                                                                                                                                                                                                                                                                                                                                                                                                                                                                                                                                                                                                                 |  |                                                                                                                                      |                                                                                                                                                                                                         |                                                                                                                                                                                                                                                                              |                                                                                                                                                                                                                                                          |                                                                                                                           |                   |                                                                                                                                                                                                                                                                                                                                                                                                                                                                                                                                                                                                                                                                                                                                                                                                                                                                                                                                                                                                                                                                                                                                                                                                                                                                                                                                                                                                                                                                                                                                                                                                                                                                                                                                                                                                                                                                                                                                                                                                                                                                                                                 |         |         |         |         |         |                                                                                                                                        |                                                                                                              |                                                                                                                             |                                                                                                                                     |                                                                                                                                  |                                                                                                                     |                                                                                         |                                                                                            |                                                                                            |                                                   |                                                                                                                                                         |                                                                                                                                                          |                                                                                                                                                                   |                                                                                                    |  |

| <p><b>Internal Medicine</b></p>                                                                                                            | <p>Transition of Care<br/><br/>Communication</p>                                                                                                                                                                                                                                                                                                                          | <p><b>11. Transitions patients effectively within and across health delivery systems. (SBP4)</b></p> <table border="1"> <thead> <tr> <th>Critical Deficiencies</th> <th>Ready for unsupervised practice</th> <th>Aspirational</th> </tr> </thead> <tbody> <tr> <td> <p>Disregards need for communication at time of transition</p> <p>Does not respond to requests of caregivers in other delivery systems</p> </td> <td> <p>Inconsistently utilizes available resources to coordinate and ensure safe and effective patient care within and across delivery systems</p> <p>Written and verbal care plans during times of transition are incomplete or absent</p> <p>Inefficient transitions of care lead to unnecessary expense or risk to a patient (e.g. duplication of tests / readmission)</p> </td> <td> <p>Recognizes the importance of communication during times of transition</p> <p>Communication with future caregivers is present but with lapses in pertinent or timely information</p> <p>Proactively communicates with past and future care givers to ensure continuity of care</p> </td> </tr> </tbody> </table> | Critical Deficiencies                                                                                                                                                                                                                                  | Ready for unsupervised practice                                                                                                                                                                                                                                                                                                                                                                                                                                                                                                                                                                                                                                                                                                                                                                                                                                                                                                                                                                                                                                                                                                                                                                                                                                                                                                                                                                                                                                                           | Aspirational | <p>Disregards need for communication at time of transition</p> <p>Does not respond to requests of caregivers in other delivery systems</p> | <p>Inconsistently utilizes available resources to coordinate and ensure safe and effective patient care within and across delivery systems</p> <p>Written and verbal care plans during times of transition are incomplete or absent</p> <p>Inefficient transitions of care lead to unnecessary expense or risk to a patient (e.g. duplication of tests / readmission)</p> | <p>Recognizes the importance of communication during times of transition</p> <p>Communication with future caregivers is present but with lapses in pertinent or timely information</p> <p>Proactively communicates with past and future care givers to ensure continuity of care</p> |                                                                                                                            |                                                                                            |                                                                                                                                                                                                                                                        |                                                                                                                                                                             |                                                                                                                                   |                                                                                                                                                                                                                                                                                                                                                                                                                                                                                                                                                                                                                                                                                                                                                                                                                                                                                                                                                                                                                                                                                                                                                                                                                                                 |                                                                                               |                                                                                                            |                                                                                                 |                                                                     |                                                                                                                            |                                                                                      |                                                                     |                                                                                |                                                                                                                    |                                                                                                                  |                                                                      |                                                                                                    |                                                                                                           |                                                                                       |                                                                                 |
|--------------------------------------------------------------------------------------------------------------------------------------------|---------------------------------------------------------------------------------------------------------------------------------------------------------------------------------------------------------------------------------------------------------------------------------------------------------------------------------------------------------------------------|-----------------------------------------------------------------------------------------------------------------------------------------------------------------------------------------------------------------------------------------------------------------------------------------------------------------------------------------------------------------------------------------------------------------------------------------------------------------------------------------------------------------------------------------------------------------------------------------------------------------------------------------------------------------------------------------------------------------------------------------------------------------------------------------------------------------------------------------------------------------------------------------------------------------------------------------------------------------------------------------------------------------------------------------------------------------------------------------------------------------------------------|--------------------------------------------------------------------------------------------------------------------------------------------------------------------------------------------------------------------------------------------------------|-------------------------------------------------------------------------------------------------------------------------------------------------------------------------------------------------------------------------------------------------------------------------------------------------------------------------------------------------------------------------------------------------------------------------------------------------------------------------------------------------------------------------------------------------------------------------------------------------------------------------------------------------------------------------------------------------------------------------------------------------------------------------------------------------------------------------------------------------------------------------------------------------------------------------------------------------------------------------------------------------------------------------------------------------------------------------------------------------------------------------------------------------------------------------------------------------------------------------------------------------------------------------------------------------------------------------------------------------------------------------------------------------------------------------------------------------------------------------------------------|--------------|--------------------------------------------------------------------------------------------------------------------------------------------|---------------------------------------------------------------------------------------------------------------------------------------------------------------------------------------------------------------------------------------------------------------------------------------------------------------------------------------------------------------------------|--------------------------------------------------------------------------------------------------------------------------------------------------------------------------------------------------------------------------------------------------------------------------------------|----------------------------------------------------------------------------------------------------------------------------|--------------------------------------------------------------------------------------------|--------------------------------------------------------------------------------------------------------------------------------------------------------------------------------------------------------------------------------------------------------|-----------------------------------------------------------------------------------------------------------------------------------------------------------------------------|-----------------------------------------------------------------------------------------------------------------------------------|-------------------------------------------------------------------------------------------------------------------------------------------------------------------------------------------------------------------------------------------------------------------------------------------------------------------------------------------------------------------------------------------------------------------------------------------------------------------------------------------------------------------------------------------------------------------------------------------------------------------------------------------------------------------------------------------------------------------------------------------------------------------------------------------------------------------------------------------------------------------------------------------------------------------------------------------------------------------------------------------------------------------------------------------------------------------------------------------------------------------------------------------------------------------------------------------------------------------------------------------------|-----------------------------------------------------------------------------------------------|------------------------------------------------------------------------------------------------------------|-------------------------------------------------------------------------------------------------|---------------------------------------------------------------------|----------------------------------------------------------------------------------------------------------------------------|--------------------------------------------------------------------------------------|---------------------------------------------------------------------|--------------------------------------------------------------------------------|--------------------------------------------------------------------------------------------------------------------|------------------------------------------------------------------------------------------------------------------|----------------------------------------------------------------------|----------------------------------------------------------------------------------------------------|-----------------------------------------------------------------------------------------------------------|---------------------------------------------------------------------------------------|---------------------------------------------------------------------------------|
| Critical Deficiencies                                                                                                                      | Ready for unsupervised practice                                                                                                                                                                                                                                                                                                                                           | Aspirational                                                                                                                                                                                                                                                                                                                                                                                                                                                                                                                                                                                                                                                                                                                                                                                                                                                                                                                                                                                                                                                                                                                      |                                                                                                                                                                                                                                                        |                                                                                                                                                                                                                                                                                                                                                                                                                                                                                                                                                                                                                                                                                                                                                                                                                                                                                                                                                                                                                                                                                                                                                                                                                                                                                                                                                                                                                                                                                           |              |                                                                                                                                            |                                                                                                                                                                                                                                                                                                                                                                           |                                                                                                                                                                                                                                                                                      |                                                                                                                            |                                                                                            |                                                                                                                                                                                                                                                        |                                                                                                                                                                             |                                                                                                                                   |                                                                                                                                                                                                                                                                                                                                                                                                                                                                                                                                                                                                                                                                                                                                                                                                                                                                                                                                                                                                                                                                                                                                                                                                                                                 |                                                                                               |                                                                                                            |                                                                                                 |                                                                     |                                                                                                                            |                                                                                      |                                                                     |                                                                                |                                                                                                                    |                                                                                                                  |                                                                      |                                                                                                    |                                                                                                           |                                                                                       |                                                                                 |
| <p>Disregards need for communication at time of transition</p> <p>Does not respond to requests of caregivers in other delivery systems</p> | <p>Inconsistently utilizes available resources to coordinate and ensure safe and effective patient care within and across delivery systems</p> <p>Written and verbal care plans during times of transition are incomplete or absent</p> <p>Inefficient transitions of care lead to unnecessary expense or risk to a patient (e.g. duplication of tests / readmission)</p> | <p>Recognizes the importance of communication during times of transition</p> <p>Communication with future caregivers is present but with lapses in pertinent or timely information</p> <p>Proactively communicates with past and future care givers to ensure continuity of care</p>                                                                                                                                                                                                                                                                                                                                                                                                                                                                                                                                                                                                                                                                                                                                                                                                                                              |                                                                                                                                                                                                                                                        |                                                                                                                                                                                                                                                                                                                                                                                                                                                                                                                                                                                                                                                                                                                                                                                                                                                                                                                                                                                                                                                                                                                                                                                                                                                                                                                                                                                                                                                                                           |              |                                                                                                                                            |                                                                                                                                                                                                                                                                                                                                                                           |                                                                                                                                                                                                                                                                                      |                                                                                                                            |                                                                                            |                                                                                                                                                                                                                                                        |                                                                                                                                                                             |                                                                                                                                   |                                                                                                                                                                                                                                                                                                                                                                                                                                                                                                                                                                                                                                                                                                                                                                                                                                                                                                                                                                                                                                                                                                                                                                                                                                                 |                                                                                               |                                                                                                            |                                                                                                 |                                                                     |                                                                                                                            |                                                                                      |                                                                     |                                                                                |                                                                                                                    |                                                                                                                  |                                                                      |                                                                                                    |                                                                                                           |                                                                                       |                                                                                 |
| <p><b>Interventional Radiology (Integrated)</b></p>                                                                                        | <p>QI</p>                                                                                                                                                                                                                                                                                                                                                                 | <p><b>SBP1 – Quality Improvement (QI)</b></p> <table border="1"> <thead> <tr> <th>Level 1</th> <th>Level 2</th> <th>Level 3</th> <th>Level 4</th> <th>Level 5</th> </tr> </thead> <tbody> <tr> <td> <p>Describes departmental QI initiatives</p> <p>Describes the departmental incident/occurrence reporting system</p> </td> <td> <p>Incorporates QI into clinical practice</p> <p>Participates in the departmental incident/occurrence reporting system</p> </td> <td> <p>Identifies and begins a systems-based practice project incorporating QI methodology</p> </td> <td> <p>Completes a systems-based practice project as required in the ACGME Program Requirements for Interventional Radiology</p> <p>Describes national radiology quality programs (e.g., National Radiology Data Registry, accreditation, peer-review)</p> </td> <td> <p>Leads a team in the design and implementation of a QI project</p> <p>Routinely participates in root cause analysis or other institutional QI committee or initiative</p> </td> </tr> </tbody> </table>                                                                        | Level 1                                                                                                                                                                                                                                                | Level 2                                                                                                                                                                                                                                                                                                                                                                                                                                                                                                                                                                                                                                                                                                                                                                                                                                                                                                                                                                                                                                                                                                                                                                                                                                                                                                                                                                                                                                                                                   | Level 3      | Level 4                                                                                                                                    | Level 5                                                                                                                                                                                                                                                                                                                                                                   | <p>Describes departmental QI initiatives</p> <p>Describes the departmental incident/occurrence reporting system</p>                                                                                                                                                                  | <p>Incorporates QI into clinical practice</p> <p>Participates in the departmental incident/occurrence reporting system</p> | <p>Identifies and begins a systems-based practice project incorporating QI methodology</p> | <p>Completes a systems-based practice project as required in the ACGME Program Requirements for Interventional Radiology</p> <p>Describes national radiology quality programs (e.g., National Radiology Data Registry, accreditation, peer-review)</p> | <p>Leads a team in the design and implementation of a QI project</p> <p>Routinely participates in root cause analysis or other institutional QI committee or initiative</p> | <p>PS</p>                                                                                                                         | <p><b>Systems-Based Practice 1: Patient Safety</b></p> <table border="1"> <thead> <tr> <th>Level 1</th> <th>Level 2</th> <th>Level 3</th> <th>Level 4</th> <th>Level 5</th> </tr> </thead> <tbody> <tr> <td> <p>Demonstrates knowledge of common patient safety events</p> </td> <td> <p>Identifies system factors that lead to patient safety events</p> </td> <td> <p>Participates in analysis of patient safety events (simulated or actual)</p> </td> <td> <p>Conducts analysis of patient safety events and offers error prevention strategies (simulated or actual)</p> </td> <td> <p>Actively engages teams and processes to modify systems to prevent patient safety events</p> </td> </tr> <tr> <td> <p>Demonstrates knowledge of how to report patient safety events</p> </td> <td> <p>Reports patient safety events through institutional reporting systems (simulated or actual)</p> </td> <td> <p>Participates in disclosure of patient safety events to patients and families (simulated or actual)</p> </td> <td> <p>Discloses patient safety events to patients and families (simulated or actual)</p> </td> <td> <p>Role models or mentors others in the disclosure of patient safety events</p> </td> </tr> </tbody> </table> | Level 1                                                                                       | Level 2                                                                                                    | Level 3                                                                                         | Level 4                                                             | Level 5                                                                                                                    | <p>Demonstrates knowledge of common patient safety events</p>                        | <p>Identifies system factors that lead to patient safety events</p> | <p>Participates in analysis of patient safety events (simulated or actual)</p> | <p>Conducts analysis of patient safety events and offers error prevention strategies (simulated or actual)</p>     | <p>Actively engages teams and processes to modify systems to prevent patient safety events</p>                   | <p>Demonstrates knowledge of how to report patient safety events</p> | <p>Reports patient safety events through institutional reporting systems (simulated or actual)</p> | <p>Participates in disclosure of patient safety events to patients and families (simulated or actual)</p> | <p>Discloses patient safety events to patients and families (simulated or actual)</p> | <p>Role models or mentors others in the disclosure of patient safety events</p> |
| Level 1                                                                                                                                    | Level 2                                                                                                                                                                                                                                                                                                                                                                   | Level 3                                                                                                                                                                                                                                                                                                                                                                                                                                                                                                                                                                                                                                                                                                                                                                                                                                                                                                                                                                                                                                                                                                                           | Level 4                                                                                                                                                                                                                                                | Level 5                                                                                                                                                                                                                                                                                                                                                                                                                                                                                                                                                                                                                                                                                                                                                                                                                                                                                                                                                                                                                                                                                                                                                                                                                                                                                                                                                                                                                                                                                   |              |                                                                                                                                            |                                                                                                                                                                                                                                                                                                                                                                           |                                                                                                                                                                                                                                                                                      |                                                                                                                            |                                                                                            |                                                                                                                                                                                                                                                        |                                                                                                                                                                             |                                                                                                                                   |                                                                                                                                                                                                                                                                                                                                                                                                                                                                                                                                                                                                                                                                                                                                                                                                                                                                                                                                                                                                                                                                                                                                                                                                                                                 |                                                                                               |                                                                                                            |                                                                                                 |                                                                     |                                                                                                                            |                                                                                      |                                                                     |                                                                                |                                                                                                                    |                                                                                                                  |                                                                      |                                                                                                    |                                                                                                           |                                                                                       |                                                                                 |
| <p>Describes departmental QI initiatives</p> <p>Describes the departmental incident/occurrence reporting system</p>                        | <p>Incorporates QI into clinical practice</p> <p>Participates in the departmental incident/occurrence reporting system</p>                                                                                                                                                                                                                                                | <p>Identifies and begins a systems-based practice project incorporating QI methodology</p>                                                                                                                                                                                                                                                                                                                                                                                                                                                                                                                                                                                                                                                                                                                                                                                                                                                                                                                                                                                                                                        | <p>Completes a systems-based practice project as required in the ACGME Program Requirements for Interventional Radiology</p> <p>Describes national radiology quality programs (e.g., National Radiology Data Registry, accreditation, peer-review)</p> | <p>Leads a team in the design and implementation of a QI project</p> <p>Routinely participates in root cause analysis or other institutional QI committee or initiative</p>                                                                                                                                                                                                                                                                                                                                                                                                                                                                                                                                                                                                                                                                                                                                                                                                                                                                                                                                                                                                                                                                                                                                                                                                                                                                                                               |              |                                                                                                                                            |                                                                                                                                                                                                                                                                                                                                                                           |                                                                                                                                                                                                                                                                                      |                                                                                                                            |                                                                                            |                                                                                                                                                                                                                                                        |                                                                                                                                                                             |                                                                                                                                   |                                                                                                                                                                                                                                                                                                                                                                                                                                                                                                                                                                                                                                                                                                                                                                                                                                                                                                                                                                                                                                                                                                                                                                                                                                                 |                                                                                               |                                                                                                            |                                                                                                 |                                                                     |                                                                                                                            |                                                                                      |                                                                     |                                                                                |                                                                                                                    |                                                                                                                  |                                                                      |                                                                                                    |                                                                                                           |                                                                                       |                                                                                 |
| Level 1                                                                                                                                    | Level 2                                                                                                                                                                                                                                                                                                                                                                   | Level 3                                                                                                                                                                                                                                                                                                                                                                                                                                                                                                                                                                                                                                                                                                                                                                                                                                                                                                                                                                                                                                                                                                                           | Level 4                                                                                                                                                                                                                                                | Level 5                                                                                                                                                                                                                                                                                                                                                                                                                                                                                                                                                                                                                                                                                                                                                                                                                                                                                                                                                                                                                                                                                                                                                                                                                                                                                                                                                                                                                                                                                   |              |                                                                                                                                            |                                                                                                                                                                                                                                                                                                                                                                           |                                                                                                                                                                                                                                                                                      |                                                                                                                            |                                                                                            |                                                                                                                                                                                                                                                        |                                                                                                                                                                             |                                                                                                                                   |                                                                                                                                                                                                                                                                                                                                                                                                                                                                                                                                                                                                                                                                                                                                                                                                                                                                                                                                                                                                                                                                                                                                                                                                                                                 |                                                                                               |                                                                                                            |                                                                                                 |                                                                     |                                                                                                                            |                                                                                      |                                                                     |                                                                                |                                                                                                                    |                                                                                                                  |                                                                      |                                                                                                    |                                                                                                           |                                                                                       |                                                                                 |
| <p>Demonstrates knowledge of common patient safety events</p>                                                                              | <p>Identifies system factors that lead to patient safety events</p>                                                                                                                                                                                                                                                                                                       | <p>Participates in analysis of patient safety events (simulated or actual)</p>                                                                                                                                                                                                                                                                                                                                                                                                                                                                                                                                                                                                                                                                                                                                                                                                                                                                                                                                                                                                                                                    | <p>Conducts analysis of patient safety events and offers error prevention strategies (simulated or actual)</p>                                                                                                                                         | <p>Actively engages teams and processes to modify systems to prevent patient safety events</p>                                                                                                                                                                                                                                                                                                                                                                                                                                                                                                                                                                                                                                                                                                                                                                                                                                                                                                                                                                                                                                                                                                                                                                                                                                                                                                                                                                                            |              |                                                                                                                                            |                                                                                                                                                                                                                                                                                                                                                                           |                                                                                                                                                                                                                                                                                      |                                                                                                                            |                                                                                            |                                                                                                                                                                                                                                                        |                                                                                                                                                                             |                                                                                                                                   |                                                                                                                                                                                                                                                                                                                                                                                                                                                                                                                                                                                                                                                                                                                                                                                                                                                                                                                                                                                                                                                                                                                                                                                                                                                 |                                                                                               |                                                                                                            |                                                                                                 |                                                                     |                                                                                                                            |                                                                                      |                                                                     |                                                                                |                                                                                                                    |                                                                                                                  |                                                                      |                                                                                                    |                                                                                                           |                                                                                       |                                                                                 |
| <p>Demonstrates knowledge of how to report patient safety events</p>                                                                       | <p>Reports patient safety events through institutional reporting systems (simulated or actual)</p>                                                                                                                                                                                                                                                                        | <p>Participates in disclosure of patient safety events to patients and families (simulated or actual)</p>                                                                                                                                                                                                                                                                                                                                                                                                                                                                                                                                                                                                                                                                                                                                                                                                                                                                                                                                                                                                                         | <p>Discloses patient safety events to patients and families (simulated or actual)</p>                                                                                                                                                                  | <p>Role models or mentors others in the disclosure of patient safety events</p>                                                                                                                                                                                                                                                                                                                                                                                                                                                                                                                                                                                                                                                                                                                                                                                                                                                                                                                                                                                                                                                                                                                                                                                                                                                                                                                                                                                                           |              |                                                                                                                                            |                                                                                                                                                                                                                                                                                                                                                                           |                                                                                                                                                                                                                                                                                      |                                                                                                                            |                                                                                            |                                                                                                                                                                                                                                                        |                                                                                                                                                                             |                                                                                                                                   |                                                                                                                                                                                                                                                                                                                                                                                                                                                                                                                                                                                                                                                                                                                                                                                                                                                                                                                                                                                                                                                                                                                                                                                                                                                 |                                                                                               |                                                                                                            |                                                                                                 |                                                                     |                                                                                                                            |                                                                                      |                                                                     |                                                                                |                                                                                                                    |                                                                                                                  |                                                                      |                                                                                                    |                                                                                                           |                                                                                       |                                                                                 |
| <p><b>Interventional Radiology (Integrated)</b></p>                                                                                        | <p>HC Costs and Revenues</p>                                                                                                                                                                                                                                                                                                                                              | <p><b>SBP2 – Health Care Economics</b></p> <table border="1"> <thead> <tr> <th>Level 1</th> <th>Level 2</th> <th>Level 3</th> <th>Level 4</th> <th>Level 5</th> </tr> </thead> <tbody> <tr> <td> <p>Describes the mechanisms for reimbursement, including types of payors</p> </td> <td> <p>States relative cost of common procedures</p> </td> <td> <p>Describes the technical and professional components of imaging costs</p> </td> <td> <p>Describes measurements of productivity (e.g., Relative Value Units [RVUs])</p> </td> <td> <p>Describes the radiology revenue cycle</p> </td> </tr> </tbody> </table>                                                                                                                                                                                                                                                                                                                                                                                                                                                                                                               | Level 1                                                                                                                                                                                                                                                | Level 2                                                                                                                                                                                                                                                                                                                                                                                                                                                                                                                                                                                                                                                                                                                                                                                                                                                                                                                                                                                                                                                                                                                                                                                                                                                                                                                                                                                                                                                                                   | Level 3      | Level 4                                                                                                                                    | Level 5                                                                                                                                                                                                                                                                                                                                                                   | <p>Describes the mechanisms for reimbursement, including types of payors</p>                                                                                                                                                                                                         | <p>States relative cost of common procedures</p>                                                                           | <p>Describes the technical and professional components of imaging costs</p>                | <p>Describes measurements of productivity (e.g., Relative Value Units [RVUs])</p>                                                                                                                                                                      | <p>Describes the radiology revenue cycle</p>                                                                                                                                | <p>QI</p>                                                                                                                         | <p><b>Systems-Based Practice 2: Quality Improvement</b></p> <table border="1"> <thead> <tr> <th>Level 1</th> <th>Level 2</th> <th>Level 3</th> <th>Level 4</th> <th>Level 5</th> </tr> </thead> <tbody> <tr> <td> <p>Demonstrates knowledge of basic quality improvement methodologies and metrics</p> </td> <td> <p>Describes local quality improvement initiatives</p> </td> <td> <p>Participates in local quality improvement initiatives</p> </td> <td> <p>Demonstrates the skills required to identify, develop, implement, and analyze a quality improvement project</p> </td> <td> <p>Creates, implements, and assesses quality improvement initiatives at the institutional or community level</p> </td> </tr> </tbody> </table>                                                                                                                                                                                                                                                                                                                                                                                                                                                                                                        | Level 1                                                                                       | Level 2                                                                                                    | Level 3                                                                                         | Level 4                                                             | Level 5                                                                                                                    | <p>Demonstrates knowledge of basic quality improvement methodologies and metrics</p> | <p>Describes local quality improvement initiatives</p>              | <p>Participates in local quality improvement initiatives</p>                   | <p>Demonstrates the skills required to identify, develop, implement, and analyze a quality improvement project</p> | <p>Creates, implements, and assesses quality improvement initiatives at the institutional or community level</p> |                                                                      |                                                                                                    |                                                                                                           |                                                                                       |                                                                                 |
| Level 1                                                                                                                                    | Level 2                                                                                                                                                                                                                                                                                                                                                                   | Level 3                                                                                                                                                                                                                                                                                                                                                                                                                                                                                                                                                                                                                                                                                                                                                                                                                                                                                                                                                                                                                                                                                                                           | Level 4                                                                                                                                                                                                                                                | Level 5                                                                                                                                                                                                                                                                                                                                                                                                                                                                                                                                                                                                                                                                                                                                                                                                                                                                                                                                                                                                                                                                                                                                                                                                                                                                                                                                                                                                                                                                                   |              |                                                                                                                                            |                                                                                                                                                                                                                                                                                                                                                                           |                                                                                                                                                                                                                                                                                      |                                                                                                                            |                                                                                            |                                                                                                                                                                                                                                                        |                                                                                                                                                                             |                                                                                                                                   |                                                                                                                                                                                                                                                                                                                                                                                                                                                                                                                                                                                                                                                                                                                                                                                                                                                                                                                                                                                                                                                                                                                                                                                                                                                 |                                                                                               |                                                                                                            |                                                                                                 |                                                                     |                                                                                                                            |                                                                                      |                                                                     |                                                                                |                                                                                                                    |                                                                                                                  |                                                                      |                                                                                                    |                                                                                                           |                                                                                       |                                                                                 |
| <p>Describes the mechanisms for reimbursement, including types of payors</p>                                                               | <p>States relative cost of common procedures</p>                                                                                                                                                                                                                                                                                                                          | <p>Describes the technical and professional components of imaging costs</p>                                                                                                                                                                                                                                                                                                                                                                                                                                                                                                                                                                                                                                                                                                                                                                                                                                                                                                                                                                                                                                                       | <p>Describes measurements of productivity (e.g., Relative Value Units [RVUs])</p>                                                                                                                                                                      | <p>Describes the radiology revenue cycle</p>                                                                                                                                                                                                                                                                                                                                                                                                                                                                                                                                                                                                                                                                                                                                                                                                                                                                                                                                                                                                                                                                                                                                                                                                                                                                                                                                                                                                                                              |              |                                                                                                                                            |                                                                                                                                                                                                                                                                                                                                                                           |                                                                                                                                                                                                                                                                                      |                                                                                                                            |                                                                                            |                                                                                                                                                                                                                                                        |                                                                                                                                                                             |                                                                                                                                   |                                                                                                                                                                                                                                                                                                                                                                                                                                                                                                                                                                                                                                                                                                                                                                                                                                                                                                                                                                                                                                                                                                                                                                                                                                                 |                                                                                               |                                                                                                            |                                                                                                 |                                                                     |                                                                                                                            |                                                                                      |                                                                     |                                                                                |                                                                                                                    |                                                                                                                  |                                                                      |                                                                                                    |                                                                                                           |                                                                                       |                                                                                 |
| Level 1                                                                                                                                    | Level 2                                                                                                                                                                                                                                                                                                                                                                   | Level 3                                                                                                                                                                                                                                                                                                                                                                                                                                                                                                                                                                                                                                                                                                                                                                                                                                                                                                                                                                                                                                                                                                                           | Level 4                                                                                                                                                                                                                                                | Level 5                                                                                                                                                                                                                                                                                                                                                                                                                                                                                                                                                                                                                                                                                                                                                                                                                                                                                                                                                                                                                                                                                                                                                                                                                                                                                                                                                                                                                                                                                   |              |                                                                                                                                            |                                                                                                                                                                                                                                                                                                                                                                           |                                                                                                                                                                                                                                                                                      |                                                                                                                            |                                                                                            |                                                                                                                                                                                                                                                        |                                                                                                                                                                             |                                                                                                                                   |                                                                                                                                                                                                                                                                                                                                                                                                                                                                                                                                                                                                                                                                                                                                                                                                                                                                                                                                                                                                                                                                                                                                                                                                                                                 |                                                                                               |                                                                                                            |                                                                                                 |                                                                     |                                                                                                                            |                                                                                      |                                                                     |                                                                                |                                                                                                                    |                                                                                                                  |                                                                      |                                                                                                    |                                                                                                           |                                                                                       |                                                                                 |
| <p>Demonstrates knowledge of basic quality improvement methodologies and metrics</p>                                                       | <p>Describes local quality improvement initiatives</p>                                                                                                                                                                                                                                                                                                                    | <p>Participates in local quality improvement initiatives</p>                                                                                                                                                                                                                                                                                                                                                                                                                                                                                                                                                                                                                                                                                                                                                                                                                                                                                                                                                                                                                                                                      | <p>Demonstrates the skills required to identify, develop, implement, and analyze a quality improvement project</p>                                                                                                                                     | <p>Creates, implements, and assesses quality improvement initiatives at the institutional or community level</p>                                                                                                                                                                                                                                                                                                                                                                                                                                                                                                                                                                                                                                                                                                                                                                                                                                                                                                                                                                                                                                                                                                                                                                                                                                                                                                                                                                          |              |                                                                                                                                            |                                                                                                                                                                                                                                                                                                                                                                           |                                                                                                                                                                                                                                                                                      |                                                                                                                            |                                                                                            |                                                                                                                                                                                                                                                        |                                                                                                                                                                             |                                                                                                                                   |                                                                                                                                                                                                                                                                                                                                                                                                                                                                                                                                                                                                                                                                                                                                                                                                                                                                                                                                                                                                                                                                                                                                                                                                                                                 |                                                                                               |                                                                                                            |                                                                                                 |                                                                     |                                                                                                                            |                                                                                      |                                                                     |                                                                                |                                                                                                                    |                                                                                                                  |                                                                      |                                                                                                    |                                                                                                           |                                                                                       |                                                                                 |
| <p><b>Interventional Radiology (Integrated)</b></p>                                                                                        |                                                                                                                                                                                                                                                                                                                                                                           |                                                                                                                                                                                                                                                                                                                                                                                                                                                                                                                                                                                                                                                                                                                                                                                                                                                                                                                                                                                                                                                                                                                                   | <p>CC</p>                                                                                                                                                                                                                                              | <p><b>Systems-Based Practice 3: System Navigation for Patient-Centered Care</b></p> <table border="1"> <thead> <tr> <th>Level 1</th> <th>Level 2</th> <th>Level 3</th> <th>Level 4</th> <th>Level 5</th> </tr> </thead> <tbody> <tr> <td> <p>Demonstrates knowledge of care coordination in radiology imaging/procedures</p> </td> <td> <p>Coordinates care of patients in routine radiology imaging/procedures effectively using the roles of the interprofessional teams</p> </td> <td> <p>Coordinates care of patients in complex radiology imaging/procedures effectively using the roles of the interprofessional teams</p> </td> <td> <p>Role models effective coordination of patient-centered care among different disciplines and specialties</p> </td> <td> <p>Analyses the process of care coordination and leads in the design and implementation of improvements</p> </td> </tr> <tr> <td> <p>Performs safe and effective transitions of care/hand-offs in basic clinical situations</p> </td> <td> <p>Performs safe and effective transitions of care/hand-offs in moderately complex clinical situations</p> </td> <td> <p>Performs safe and effective transitions of care/hand-offs in complex clinical situations</p> </td> <td> <p>Role models safe and effective transitions of care/hand-offs</p> </td> <td> <p>Improves quality of transitions of care within and across health care delivery systems to optimize patient outcomes</p> </td> </tr> </tbody> </table> | Level 1      | Level 2                                                                                                                                    | Level 3                                                                                                                                                                                                                                                                                                                                                                   | Level 4                                                                                                                                                                                                                                                                              | Level 5                                                                                                                    | <p>Demonstrates knowledge of care coordination in radiology imaging/procedures</p>         | <p>Coordinates care of patients in routine radiology imaging/procedures effectively using the roles of the interprofessional teams</p>                                                                                                                 | <p>Coordinates care of patients in complex radiology imaging/procedures effectively using the roles of the interprofessional teams</p>                                      | <p>Role models effective coordination of patient-centered care among different disciplines and specialties</p>                    | <p>Analyses the process of care coordination and leads in the design and implementation of improvements</p>                                                                                                                                                                                                                                                                                                                                                                                                                                                                                                                                                                                                                                                                                                                                                                                                                                                                                                                                                                                                                                                                                                                                     | <p>Performs safe and effective transitions of care/hand-offs in basic clinical situations</p> | <p>Performs safe and effective transitions of care/hand-offs in moderately complex clinical situations</p> | <p>Performs safe and effective transitions of care/hand-offs in complex clinical situations</p> | <p>Role models safe and effective transitions of care/hand-offs</p> | <p>Improves quality of transitions of care within and across health care delivery systems to optimize patient outcomes</p> |                                                                                      |                                                                     |                                                                                |                                                                                                                    |                                                                                                                  |                                                                      |                                                                                                    |                                                                                                           |                                                                                       |                                                                                 |
| Level 1                                                                                                                                    | Level 2                                                                                                                                                                                                                                                                                                                                                                   | Level 3                                                                                                                                                                                                                                                                                                                                                                                                                                                                                                                                                                                                                                                                                                                                                                                                                                                                                                                                                                                                                                                                                                                           | Level 4                                                                                                                                                                                                                                                | Level 5                                                                                                                                                                                                                                                                                                                                                                                                                                                                                                                                                                                                                                                                                                                                                                                                                                                                                                                                                                                                                                                                                                                                                                                                                                                                                                                                                                                                                                                                                   |              |                                                                                                                                            |                                                                                                                                                                                                                                                                                                                                                                           |                                                                                                                                                                                                                                                                                      |                                                                                                                            |                                                                                            |                                                                                                                                                                                                                                                        |                                                                                                                                                                             |                                                                                                                                   |                                                                                                                                                                                                                                                                                                                                                                                                                                                                                                                                                                                                                                                                                                                                                                                                                                                                                                                                                                                                                                                                                                                                                                                                                                                 |                                                                                               |                                                                                                            |                                                                                                 |                                                                     |                                                                                                                            |                                                                                      |                                                                     |                                                                                |                                                                                                                    |                                                                                                                  |                                                                      |                                                                                                    |                                                                                                           |                                                                                       |                                                                                 |
| <p>Demonstrates knowledge of care coordination in radiology imaging/procedures</p>                                                         | <p>Coordinates care of patients in routine radiology imaging/procedures effectively using the roles of the interprofessional teams</p>                                                                                                                                                                                                                                    | <p>Coordinates care of patients in complex radiology imaging/procedures effectively using the roles of the interprofessional teams</p>                                                                                                                                                                                                                                                                                                                                                                                                                                                                                                                                                                                                                                                                                                                                                                                                                                                                                                                                                                                            | <p>Role models effective coordination of patient-centered care among different disciplines and specialties</p>                                                                                                                                         | <p>Analyses the process of care coordination and leads in the design and implementation of improvements</p>                                                                                                                                                                                                                                                                                                                                                                                                                                                                                                                                                                                                                                                                                                                                                                                                                                                                                                                                                                                                                                                                                                                                                                                                                                                                                                                                                                               |              |                                                                                                                                            |                                                                                                                                                                                                                                                                                                                                                                           |                                                                                                                                                                                                                                                                                      |                                                                                                                            |                                                                                            |                                                                                                                                                                                                                                                        |                                                                                                                                                                             |                                                                                                                                   |                                                                                                                                                                                                                                                                                                                                                                                                                                                                                                                                                                                                                                                                                                                                                                                                                                                                                                                                                                                                                                                                                                                                                                                                                                                 |                                                                                               |                                                                                                            |                                                                                                 |                                                                     |                                                                                                                            |                                                                                      |                                                                     |                                                                                |                                                                                                                    |                                                                                                                  |                                                                      |                                                                                                    |                                                                                                           |                                                                                       |                                                                                 |
| <p>Performs safe and effective transitions of care/hand-offs in basic clinical situations</p>                                              | <p>Performs safe and effective transitions of care/hand-offs in moderately complex clinical situations</p>                                                                                                                                                                                                                                                                | <p>Performs safe and effective transitions of care/hand-offs in complex clinical situations</p>                                                                                                                                                                                                                                                                                                                                                                                                                                                                                                                                                                                                                                                                                                                                                                                                                                                                                                                                                                                                                                   | <p>Role models safe and effective transitions of care/hand-offs</p>                                                                                                                                                                                    | <p>Improves quality of transitions of care within and across health care delivery systems to optimize patient outcomes</p>                                                                                                                                                                                                                                                                                                                                                                                                                                                                                                                                                                                                                                                                                                                                                                                                                                                                                                                                                                                                                                                                                                                                                                                                                                                                                                                                                                |              |                                                                                                                                            |                                                                                                                                                                                                                                                                                                                                                                           |                                                                                                                                                                                                                                                                                      |                                                                                                                            |                                                                                            |                                                                                                                                                                                                                                                        |                                                                                                                                                                             |                                                                                                                                   |                                                                                                                                                                                                                                                                                                                                                                                                                                                                                                                                                                                                                                                                                                                                                                                                                                                                                                                                                                                                                                                                                                                                                                                                                                                 |                                                                                               |                                                                                                            |                                                                                                 |                                                                     |                                                                                                                            |                                                                                      |                                                                     |                                                                                |                                                                                                                    |                                                                                                                  |                                                                      |                                                                                                    |                                                                                                           |                                                                                       |                                                                                 |
| <p><b>Interventional Radiology (Integrated)</b></p>                                                                                        |                                                                                                                                                                                                                                                                                                                                                                           |                                                                                                                                                                                                                                                                                                                                                                                                                                                                                                                                                                                                                                                                                                                                                                                                                                                                                                                                                                                                                                                                                                                                   | <p>Multi-disciplinary Conferences</p>                                                                                                                                                                                                                  | <p><b>Systems-Based Practice 4: Multidisciplinary Conferences</b></p> <table border="1"> <thead> <tr> <th>Level 1</th> <th>Level 2</th> <th>Level 3</th> <th>Level 4</th> <th>Level 5</th> </tr> </thead> <tbody> <tr> <td> <p>Demonstrates basic knowledge of how a multidisciplinary conference operates</p> </td> <td> <p>Attends multidisciplinary conferences</p> </td> <td> <p>Contributes meaningfully to the multidisciplinary conference</p> </td> <td> <p>Initiates and presents their own patients at multidisciplinary conference, and is responsible for comprehensive discussion</p> </td> <td> <p>Leads a multidisciplinary conferences</p> </td> </tr> </tbody> </table>                                                                                                                                                                                                                                                                                                                                                                                                                                                                                                                                                                                                                                                                                                                                                                                                  | Level 1      | Level 2                                                                                                                                    | Level 3                                                                                                                                                                                                                                                                                                                                                                   | Level 4                                                                                                                                                                                                                                                                              | Level 5                                                                                                                    | <p>Demonstrates basic knowledge of how a multidisciplinary conference operates</p>         | <p>Attends multidisciplinary conferences</p>                                                                                                                                                                                                           | <p>Contributes meaningfully to the multidisciplinary conference</p>                                                                                                         | <p>Initiates and presents their own patients at multidisciplinary conference, and is responsible for comprehensive discussion</p> | <p>Leads a multidisciplinary conferences</p>                                                                                                                                                                                                                                                                                                                                                                                                                                                                                                                                                                                                                                                                                                                                                                                                                                                                                                                                                                                                                                                                                                                                                                                                    |                                                                                               |                                                                                                            |                                                                                                 |                                                                     |                                                                                                                            |                                                                                      |                                                                     |                                                                                |                                                                                                                    |                                                                                                                  |                                                                      |                                                                                                    |                                                                                                           |                                                                                       |                                                                                 |
| Level 1                                                                                                                                    | Level 2                                                                                                                                                                                                                                                                                                                                                                   | Level 3                                                                                                                                                                                                                                                                                                                                                                                                                                                                                                                                                                                                                                                                                                                                                                                                                                                                                                                                                                                                                                                                                                                           | Level 4                                                                                                                                                                                                                                                | Level 5                                                                                                                                                                                                                                                                                                                                                                                                                                                                                                                                                                                                                                                                                                                                                                                                                                                                                                                                                                                                                                                                                                                                                                                                                                                                                                                                                                                                                                                                                   |              |                                                                                                                                            |                                                                                                                                                                                                                                                                                                                                                                           |                                                                                                                                                                                                                                                                                      |                                                                                                                            |                                                                                            |                                                                                                                                                                                                                                                        |                                                                                                                                                                             |                                                                                                                                   |                                                                                                                                                                                                                                                                                                                                                                                                                                                                                                                                                                                                                                                                                                                                                                                                                                                                                                                                                                                                                                                                                                                                                                                                                                                 |                                                                                               |                                                                                                            |                                                                                                 |                                                                     |                                                                                                                            |                                                                                      |                                                                     |                                                                                |                                                                                                                    |                                                                                                                  |                                                                      |                                                                                                    |                                                                                                           |                                                                                       |                                                                                 |
| <p>Demonstrates basic knowledge of how a multidisciplinary conference operates</p>                                                         | <p>Attends multidisciplinary conferences</p>                                                                                                                                                                                                                                                                                                                              | <p>Contributes meaningfully to the multidisciplinary conference</p>                                                                                                                                                                                                                                                                                                                                                                                                                                                                                                                                                                                                                                                                                                                                                                                                                                                                                                                                                                                                                                                               | <p>Initiates and presents their own patients at multidisciplinary conference, and is responsible for comprehensive discussion</p>                                                                                                                      | <p>Leads a multidisciplinary conferences</p>                                                                                                                                                                                                                                                                                                                                                                                                                                                                                                                                                                                                                                                                                                                                                                                                                                                                                                                                                                                                                                                                                                                                                                                                                                                                                                                                                                                                                                              |              |                                                                                                                                            |                                                                                                                                                                                                                                                                                                                                                                           |                                                                                                                                                                                                                                                                                      |                                                                                                                            |                                                                                            |                                                                                                                                                                                                                                                        |                                                                                                                                                                             |                                                                                                                                   |                                                                                                                                                                                                                                                                                                                                                                                                                                                                                                                                                                                                                                                                                                                                                                                                                                                                                                                                                                                                                                                                                                                                                                                                                                                 |                                                                                               |                                                                                                            |                                                                                                 |                                                                     |                                                                                                                            |                                                                                      |                                                                     |                                                                                |                                                                                                                    |                                                                                                                  |                                                                      |                                                                                                    |                                                                                                           |                                                                                       |                                                                                 |
| <p><b>Interventional Radiology (Integrated)</b></p>                                                                                        |                                                                                                                                                                                                                                                                                                                                                                           |                                                                                                                                                                                                                                                                                                                                                                                                                                                                                                                                                                                                                                                                                                                                                                                                                                                                                                                                                                                                                                                                                                                                   | <p>Population Health</p>                                                                                                                                                                                                                               | <p><b>Systems-Based Practice 5: Population Health</b></p> <table border="1"> <thead> <tr> <th>Level 1</th> <th>Level 2</th> <th>Level 3</th> <th>Level 4</th> <th>Level 5</th> </tr> </thead> <tbody> <tr> <td> <p>Demonstrates knowledge of population and community health needs and disparities</p> </td> <td> <p>Identifies specific population and community health needs and inequities for their local population</p> </td> <td> <p>Uses local resources effectively to meet the needs of a patient population and community</p> </td> <td> <p>Participates in changing and adapting practice to provide for the needs of specific populations</p> </td> <td> <p>Leads innovations and advocates for populations and communities with health care inequities</p> </td> </tr> </tbody> </table>                                                                                                                                                                                                                                                                                                                                                                                                                                                                                                                                                                                                                                                                                     | Level 1      | Level 2                                                                                                                                    | Level 3                                                                                                                                                                                                                                                                                                                                                                   | Level 4                                                                                                                                                                                                                                                                              | Level 5                                                                                                                    | <p>Demonstrates knowledge of population and community health needs and disparities</p>     | <p>Identifies specific population and community health needs and inequities for their local population</p>                                                                                                                                             | <p>Uses local resources effectively to meet the needs of a patient population and community</p>                                                                             | <p>Participates in changing and adapting practice to provide for the needs of specific populations</p>                            | <p>Leads innovations and advocates for populations and communities with health care inequities</p>                                                                                                                                                                                                                                                                                                                                                                                                                                                                                                                                                                                                                                                                                                                                                                                                                                                                                                                                                                                                                                                                                                                                              |                                                                                               |                                                                                                            |                                                                                                 |                                                                     |                                                                                                                            |                                                                                      |                                                                     |                                                                                |                                                                                                                    |                                                                                                                  |                                                                      |                                                                                                    |                                                                                                           |                                                                                       |                                                                                 |
| Level 1                                                                                                                                    | Level 2                                                                                                                                                                                                                                                                                                                                                                   | Level 3                                                                                                                                                                                                                                                                                                                                                                                                                                                                                                                                                                                                                                                                                                                                                                                                                                                                                                                                                                                                                                                                                                                           | Level 4                                                                                                                                                                                                                                                | Level 5                                                                                                                                                                                                                                                                                                                                                                                                                                                                                                                                                                                                                                                                                                                                                                                                                                                                                                                                                                                                                                                                                                                                                                                                                                                                                                                                                                                                                                                                                   |              |                                                                                                                                            |                                                                                                                                                                                                                                                                                                                                                                           |                                                                                                                                                                                                                                                                                      |                                                                                                                            |                                                                                            |                                                                                                                                                                                                                                                        |                                                                                                                                                                             |                                                                                                                                   |                                                                                                                                                                                                                                                                                                                                                                                                                                                                                                                                                                                                                                                                                                                                                                                                                                                                                                                                                                                                                                                                                                                                                                                                                                                 |                                                                                               |                                                                                                            |                                                                                                 |                                                                     |                                                                                                                            |                                                                                      |                                                                     |                                                                                |                                                                                                                    |                                                                                                                  |                                                                      |                                                                                                    |                                                                                                           |                                                                                       |                                                                                 |
| <p>Demonstrates knowledge of population and community health needs and disparities</p>                                                     | <p>Identifies specific population and community health needs and inequities for their local population</p>                                                                                                                                                                                                                                                                | <p>Uses local resources effectively to meet the needs of a patient population and community</p>                                                                                                                                                                                                                                                                                                                                                                                                                                                                                                                                                                                                                                                                                                                                                                                                                                                                                                                                                                                                                                   | <p>Participates in changing and adapting practice to provide for the needs of specific populations</p>                                                                                                                                                 | <p>Leads innovations and advocates for populations and communities with health care inequities</p>                                                                                                                                                                                                                                                                                                                                                                                                                                                                                                                                                                                                                                                                                                                                                                                                                                                                                                                                                                                                                                                                                                                                                                                                                                                                                                                                                                                        |              |                                                                                                                                            |                                                                                                                                                                                                                                                                                                                                                                           |                                                                                                                                                                                                                                                                                      |                                                                                                                            |                                                                                            |                                                                                                                                                                                                                                                        |                                                                                                                                                                             |                                                                                                                                   |                                                                                                                                                                                                                                                                                                                                                                                                                                                                                                                                                                                                                                                                                                                                                                                                                                                                                                                                                                                                                                                                                                                                                                                                                                                 |                                                                                               |                                                                                                            |                                                                                                 |                                                                     |                                                                                                                            |                                                                                      |                                                                     |                                                                                |                                                                                                                    |                                                                                                                  |                                                                      |                                                                                                    |                                                                                                           |                                                                                       |                                                                                 |

| Interventional Radiology (Integrated)                                                                                                                                                                                                                                                                                             |                                                                                                                                                                                                                                                                                                                                                                                                                                                                                                                                                                                                |                                                                                                                                                                                                                                                                                                                                                                                                                                                                                                                                                                                                                                                                                                                                                                                                                                                                                                                                                                                                                                                                                                                                                                                                                                                                                                                                                                                                                                                                                                                                                                                                                                                                                                                                                                                                                                                                                                                                                                                                                                                                                                                                                                                                                                                                                                                                                                                                                                                                                                   | HC Systems                                                                                                                                                                                                                                                                                                                                                                                                                                                                                                                         | <table border="1"> <thead> <tr> <th colspan="5">Systems-Based Practice 6: Physician Role in Health Care Systems</th> </tr> <tr> <th>Level 1</th> <th>Level 2</th> <th>Level 3</th> <th>Level 4</th> <th>Level 5</th> </tr> </thead> <tbody> <tr> <td>Identifies key components of the complex health care system</td> <td>Describes how components of a complex health care system are interrelated, and how this impacts patient care</td> <td>Discusses how individual practice affects the broader system</td> <td>Manages various components of the complex health care system to provide efficient and effective patient care</td> <td>Advocates for or leads systems change that enhances high-value, efficient, and effective patient care</td> </tr> <tr> <td>Describes the mechanisms for reimbursement, including types of payers</td> <td>States relative cost of common procedures</td> <td>Describes the technical and professional components of imaging costs</td> <td>Describes the radiology revenue cycle and measurements of productivity</td> <td>Participates in health policy advocacy activities</td> </tr> </tbody> </table>                                                                                              | Systems-Based Practice 6: Physician Role in Health Care Systems |         |         |                                                                                                                                                                                                                                                                                                                                   |                                                                                                                                                                                                                                                                                                                                                                                                                                                                                                                                                                                                | Level 1                                                                                                                                                                                                                                                                                                                                                                                                                                                                                                                                                                    | Level 2                                                                                                                                                                                                                                                                                                                                                                                                                                                                                                                            | Level 3                                                                | Level 4      | Level 5                                                                                                                                                                                                                                                                                                                                                                                                                                                                                                                                                                                                                                                                                                                                                                                                                                                                                                                                                                                                                                                                                                                                                                                                                                                                                                                                                                                                                                                                                                                                                                                                                                                                                                           | Identifies key components of the complex health care system                                                            | Describes how components of a complex health care system are interrelated, and how this impacts patient care           | Discusses how individual practice affects the broader system             | Manages various components of the complex health care system to provide efficient and effective patient care  | Advocates for or leads systems change that enhances high-value, efficient, and effective patient care | Describes the mechanisms for reimbursement, including types of payers | States relative cost of common procedures                                             | Describes the technical and professional components of imaging costs                 | Describes the radiology revenue cycle and measurements of productivity   | Participates in health policy advocacy activities       |                                                        |                                                              |                                                                         |                                                                                                         |                                                                                         |                                                               |                                                                                             |                                                                                                    |                                                                                |                                                                          |                                                                               |                                                                 |                                                                       |                                                                                                             |                                                                                                                           |
|-----------------------------------------------------------------------------------------------------------------------------------------------------------------------------------------------------------------------------------------------------------------------------------------------------------------------------------|------------------------------------------------------------------------------------------------------------------------------------------------------------------------------------------------------------------------------------------------------------------------------------------------------------------------------------------------------------------------------------------------------------------------------------------------------------------------------------------------------------------------------------------------------------------------------------------------|---------------------------------------------------------------------------------------------------------------------------------------------------------------------------------------------------------------------------------------------------------------------------------------------------------------------------------------------------------------------------------------------------------------------------------------------------------------------------------------------------------------------------------------------------------------------------------------------------------------------------------------------------------------------------------------------------------------------------------------------------------------------------------------------------------------------------------------------------------------------------------------------------------------------------------------------------------------------------------------------------------------------------------------------------------------------------------------------------------------------------------------------------------------------------------------------------------------------------------------------------------------------------------------------------------------------------------------------------------------------------------------------------------------------------------------------------------------------------------------------------------------------------------------------------------------------------------------------------------------------------------------------------------------------------------------------------------------------------------------------------------------------------------------------------------------------------------------------------------------------------------------------------------------------------------------------------------------------------------------------------------------------------------------------------------------------------------------------------------------------------------------------------------------------------------------------------------------------------------------------------------------------------------------------------------------------------------------------------------------------------------------------------------------------------------------------------------------------------------------------------|------------------------------------------------------------------------------------------------------------------------------------------------------------------------------------------------------------------------------------------------------------------------------------------------------------------------------------------------------------------------------------------------------------------------------------------------------------------------------------------------------------------------------------|---------------------------------------------------------------------------------------------------------------------------------------------------------------------------------------------------------------------------------------------------------------------------------------------------------------------------------------------------------------------------------------------------------------------------------------------------------------------------------------------------------------------------------------------------------------------------------------------------------------------------------------------------------------------------------------------------------------------------------------------------------------------------------------------------------------------------------------------------------------------------------------------------------------------------------------------------------------------------------------------------------------------------------------------------------------------------------------------------------------------------------------------------------------------------------------------------------------------------------------------------|-----------------------------------------------------------------|---------|---------|-----------------------------------------------------------------------------------------------------------------------------------------------------------------------------------------------------------------------------------------------------------------------------------------------------------------------------------|------------------------------------------------------------------------------------------------------------------------------------------------------------------------------------------------------------------------------------------------------------------------------------------------------------------------------------------------------------------------------------------------------------------------------------------------------------------------------------------------------------------------------------------------------------------------------------------------|----------------------------------------------------------------------------------------------------------------------------------------------------------------------------------------------------------------------------------------------------------------------------------------------------------------------------------------------------------------------------------------------------------------------------------------------------------------------------------------------------------------------------------------------------------------------------|------------------------------------------------------------------------------------------------------------------------------------------------------------------------------------------------------------------------------------------------------------------------------------------------------------------------------------------------------------------------------------------------------------------------------------------------------------------------------------------------------------------------------------|------------------------------------------------------------------------|--------------|-------------------------------------------------------------------------------------------------------------------------------------------------------------------------------------------------------------------------------------------------------------------------------------------------------------------------------------------------------------------------------------------------------------------------------------------------------------------------------------------------------------------------------------------------------------------------------------------------------------------------------------------------------------------------------------------------------------------------------------------------------------------------------------------------------------------------------------------------------------------------------------------------------------------------------------------------------------------------------------------------------------------------------------------------------------------------------------------------------------------------------------------------------------------------------------------------------------------------------------------------------------------------------------------------------------------------------------------------------------------------------------------------------------------------------------------------------------------------------------------------------------------------------------------------------------------------------------------------------------------------------------------------------------------------------------------------------------------|------------------------------------------------------------------------------------------------------------------------|------------------------------------------------------------------------------------------------------------------------|--------------------------------------------------------------------------|---------------------------------------------------------------------------------------------------------------|-------------------------------------------------------------------------------------------------------|-----------------------------------------------------------------------|---------------------------------------------------------------------------------------|--------------------------------------------------------------------------------------|--------------------------------------------------------------------------|---------------------------------------------------------|--------------------------------------------------------|--------------------------------------------------------------|-------------------------------------------------------------------------|---------------------------------------------------------------------------------------------------------|-----------------------------------------------------------------------------------------|---------------------------------------------------------------|---------------------------------------------------------------------------------------------|----------------------------------------------------------------------------------------------------|--------------------------------------------------------------------------------|--------------------------------------------------------------------------|-------------------------------------------------------------------------------|-----------------------------------------------------------------|-----------------------------------------------------------------------|-------------------------------------------------------------------------------------------------------------|---------------------------------------------------------------------------------------------------------------------------|
| Systems-Based Practice 6: Physician Role in Health Care Systems                                                                                                                                                                                                                                                                   |                                                                                                                                                                                                                                                                                                                                                                                                                                                                                                                                                                                                |                                                                                                                                                                                                                                                                                                                                                                                                                                                                                                                                                                                                                                                                                                                                                                                                                                                                                                                                                                                                                                                                                                                                                                                                                                                                                                                                                                                                                                                                                                                                                                                                                                                                                                                                                                                                                                                                                                                                                                                                                                                                                                                                                                                                                                                                                                                                                                                                                                                                                                   |                                                                                                                                                                                                                                                                                                                                                                                                                                                                                                                                    |                                                                                                                                                                                                                                                                                                                                                                                                                                                                                                                                                                                                                                                                                                                                                                                                                                                                                                                                                                                                                                                                                                                                                                                                                                                   |                                                                 |         |         |                                                                                                                                                                                                                                                                                                                                   |                                                                                                                                                                                                                                                                                                                                                                                                                                                                                                                                                                                                |                                                                                                                                                                                                                                                                                                                                                                                                                                                                                                                                                                            |                                                                                                                                                                                                                                                                                                                                                                                                                                                                                                                                    |                                                                        |              |                                                                                                                                                                                                                                                                                                                                                                                                                                                                                                                                                                                                                                                                                                                                                                                                                                                                                                                                                                                                                                                                                                                                                                                                                                                                                                                                                                                                                                                                                                                                                                                                                                                                                                                   |                                                                                                                        |                                                                                                                        |                                                                          |                                                                                                               |                                                                                                       |                                                                       |                                                                                       |                                                                                      |                                                                          |                                                         |                                                        |                                                              |                                                                         |                                                                                                         |                                                                                         |                                                               |                                                                                             |                                                                                                    |                                                                                |                                                                          |                                                                               |                                                                 |                                                                       |                                                                                                             |                                                                                                                           |
| Level 1                                                                                                                                                                                                                                                                                                                           | Level 2                                                                                                                                                                                                                                                                                                                                                                                                                                                                                                                                                                                        | Level 3                                                                                                                                                                                                                                                                                                                                                                                                                                                                                                                                                                                                                                                                                                                                                                                                                                                                                                                                                                                                                                                                                                                                                                                                                                                                                                                                                                                                                                                                                                                                                                                                                                                                                                                                                                                                                                                                                                                                                                                                                                                                                                                                                                                                                                                                                                                                                                                                                                                                                           | Level 4                                                                                                                                                                                                                                                                                                                                                                                                                                                                                                                            | Level 5                                                                                                                                                                                                                                                                                                                                                                                                                                                                                                                                                                                                                                                                                                                                                                                                                                                                                                                                                                                                                                                                                                                                                                                                                                           |                                                                 |         |         |                                                                                                                                                                                                                                                                                                                                   |                                                                                                                                                                                                                                                                                                                                                                                                                                                                                                                                                                                                |                                                                                                                                                                                                                                                                                                                                                                                                                                                                                                                                                                            |                                                                                                                                                                                                                                                                                                                                                                                                                                                                                                                                    |                                                                        |              |                                                                                                                                                                                                                                                                                                                                                                                                                                                                                                                                                                                                                                                                                                                                                                                                                                                                                                                                                                                                                                                                                                                                                                                                                                                                                                                                                                                                                                                                                                                                                                                                                                                                                                                   |                                                                                                                        |                                                                                                                        |                                                                          |                                                                                                               |                                                                                                       |                                                                       |                                                                                       |                                                                                      |                                                                          |                                                         |                                                        |                                                              |                                                                         |                                                                                                         |                                                                                         |                                                               |                                                                                             |                                                                                                    |                                                                                |                                                                          |                                                                               |                                                                 |                                                                       |                                                                                                             |                                                                                                                           |
| Identifies key components of the complex health care system                                                                                                                                                                                                                                                                       | Describes how components of a complex health care system are interrelated, and how this impacts patient care                                                                                                                                                                                                                                                                                                                                                                                                                                                                                   | Discusses how individual practice affects the broader system                                                                                                                                                                                                                                                                                                                                                                                                                                                                                                                                                                                                                                                                                                                                                                                                                                                                                                                                                                                                                                                                                                                                                                                                                                                                                                                                                                                                                                                                                                                                                                                                                                                                                                                                                                                                                                                                                                                                                                                                                                                                                                                                                                                                                                                                                                                                                                                                                                      | Manages various components of the complex health care system to provide efficient and effective patient care                                                                                                                                                                                                                                                                                                                                                                                                                       | Advocates for or leads systems change that enhances high-value, efficient, and effective patient care                                                                                                                                                                                                                                                                                                                                                                                                                                                                                                                                                                                                                                                                                                                                                                                                                                                                                                                                                                                                                                                                                                                                             |                                                                 |         |         |                                                                                                                                                                                                                                                                                                                                   |                                                                                                                                                                                                                                                                                                                                                                                                                                                                                                                                                                                                |                                                                                                                                                                                                                                                                                                                                                                                                                                                                                                                                                                            |                                                                                                                                                                                                                                                                                                                                                                                                                                                                                                                                    |                                                                        |              |                                                                                                                                                                                                                                                                                                                                                                                                                                                                                                                                                                                                                                                                                                                                                                                                                                                                                                                                                                                                                                                                                                                                                                                                                                                                                                                                                                                                                                                                                                                                                                                                                                                                                                                   |                                                                                                                        |                                                                                                                        |                                                                          |                                                                                                               |                                                                                                       |                                                                       |                                                                                       |                                                                                      |                                                                          |                                                         |                                                        |                                                              |                                                                         |                                                                                                         |                                                                                         |                                                               |                                                                                             |                                                                                                    |                                                                                |                                                                          |                                                                               |                                                                 |                                                                       |                                                                                                             |                                                                                                                           |
| Describes the mechanisms for reimbursement, including types of payers                                                                                                                                                                                                                                                             | States relative cost of common procedures                                                                                                                                                                                                                                                                                                                                                                                                                                                                                                                                                      | Describes the technical and professional components of imaging costs                                                                                                                                                                                                                                                                                                                                                                                                                                                                                                                                                                                                                                                                                                                                                                                                                                                                                                                                                                                                                                                                                                                                                                                                                                                                                                                                                                                                                                                                                                                                                                                                                                                                                                                                                                                                                                                                                                                                                                                                                                                                                                                                                                                                                                                                                                                                                                                                                              | Describes the radiology revenue cycle and measurements of productivity                                                                                                                                                                                                                                                                                                                                                                                                                                                             | Participates in health policy advocacy activities                                                                                                                                                                                                                                                                                                                                                                                                                                                                                                                                                                                                                                                                                                                                                                                                                                                                                                                                                                                                                                                                                                                                                                                                 |                                                                 |         |         |                                                                                                                                                                                                                                                                                                                                   |                                                                                                                                                                                                                                                                                                                                                                                                                                                                                                                                                                                                |                                                                                                                                                                                                                                                                                                                                                                                                                                                                                                                                                                            |                                                                                                                                                                                                                                                                                                                                                                                                                                                                                                                                    |                                                                        |              |                                                                                                                                                                                                                                                                                                                                                                                                                                                                                                                                                                                                                                                                                                                                                                                                                                                                                                                                                                                                                                                                                                                                                                                                                                                                                                                                                                                                                                                                                                                                                                                                                                                                                                                   |                                                                                                                        |                                                                                                                        |                                                                          |                                                                                                               |                                                                                                       |                                                                       |                                                                                       |                                                                                      |                                                                          |                                                         |                                                        |                                                              |                                                                         |                                                                                                         |                                                                                         |                                                               |                                                                                             |                                                                                                    |                                                                                |                                                                          |                                                                               |                                                                 |                                                                       |                                                                                                             |                                                                                                                           |
| Interventional Radiology (Integrated)                                                                                                                                                                                                                                                                                             |                                                                                                                                                                                                                                                                                                                                                                                                                                                                                                                                                                                                |                                                                                                                                                                                                                                                                                                                                                                                                                                                                                                                                                                                                                                                                                                                                                                                                                                                                                                                                                                                                                                                                                                                                                                                                                                                                                                                                                                                                                                                                                                                                                                                                                                                                                                                                                                                                                                                                                                                                                                                                                                                                                                                                                                                                                                                                                                                                                                                                                                                                                                   | PS                                                                                                                                                                                                                                                                                                                                                                                                                                                                                                                                 | <table border="1"> <thead> <tr> <th colspan="5">Systems-Based Practice 7: Radiation Safety</th> </tr> <tr> <th>Level 1</th> <th>Level 2</th> <th>Level 3</th> <th>Level 4</th> <th>Level 5</th> </tr> </thead> <tbody> <tr> <td>Demonstrates knowledge of the mechanisms of radiation injury and the ALARA ("as low as reasonably achievable") concept</td> <td>Applies principles of ALARA in daily practice<br/><br/>Uses fluoroscopy techniques that decrease exposure, with guidance</td> <td>Accesses resources to determine exam-specific radiation dose information</td> <td>Communicates the relative risk and benefits of exam-specific radiation exposure to patients and practitioners</td> <td>Creates, implements, and assesses radiation safety initiatives at the institutional level</td> </tr> <tr> <td>Wears lead apron and dosimeter at all times</td> <td>Uses radiation protection devices, including shielding, as appropriate, with guidance</td> <td>Independently uses radiation protection devices, including shielding, as appropriate</td> <td>Counsels colleagues and allied health staff regarding radiation exposure</td> <td>Participates in radiation safety education and research</td> </tr> </tbody> </table> | Systems-Based Practice 7: Radiation Safety                      |         |         |                                                                                                                                                                                                                                                                                                                                   |                                                                                                                                                                                                                                                                                                                                                                                                                                                                                                                                                                                                | Level 1                                                                                                                                                                                                                                                                                                                                                                                                                                                                                                                                                                    | Level 2                                                                                                                                                                                                                                                                                                                                                                                                                                                                                                                            | Level 3                                                                | Level 4      | Level 5                                                                                                                                                                                                                                                                                                                                                                                                                                                                                                                                                                                                                                                                                                                                                                                                                                                                                                                                                                                                                                                                                                                                                                                                                                                                                                                                                                                                                                                                                                                                                                                                                                                                                                           | Demonstrates knowledge of the mechanisms of radiation injury and the ALARA ("as low as reasonably achievable") concept | Applies principles of ALARA in daily practice<br><br>Uses fluoroscopy techniques that decrease exposure, with guidance | Accesses resources to determine exam-specific radiation dose information | Communicates the relative risk and benefits of exam-specific radiation exposure to patients and practitioners | Creates, implements, and assesses radiation safety initiatives at the institutional level             | Wears lead apron and dosimeter at all times                           | Uses radiation protection devices, including shielding, as appropriate, with guidance | Independently uses radiation protection devices, including shielding, as appropriate | Counsels colleagues and allied health staff regarding radiation exposure | Participates in radiation safety education and research |                                                        |                                                              |                                                                         |                                                                                                         |                                                                                         |                                                               |                                                                                             |                                                                                                    |                                                                                |                                                                          |                                                                               |                                                                 |                                                                       |                                                                                                             |                                                                                                                           |
| Systems-Based Practice 7: Radiation Safety                                                                                                                                                                                                                                                                                        |                                                                                                                                                                                                                                                                                                                                                                                                                                                                                                                                                                                                |                                                                                                                                                                                                                                                                                                                                                                                                                                                                                                                                                                                                                                                                                                                                                                                                                                                                                                                                                                                                                                                                                                                                                                                                                                                                                                                                                                                                                                                                                                                                                                                                                                                                                                                                                                                                                                                                                                                                                                                                                                                                                                                                                                                                                                                                                                                                                                                                                                                                                                   |                                                                                                                                                                                                                                                                                                                                                                                                                                                                                                                                    |                                                                                                                                                                                                                                                                                                                                                                                                                                                                                                                                                                                                                                                                                                                                                                                                                                                                                                                                                                                                                                                                                                                                                                                                                                                   |                                                                 |         |         |                                                                                                                                                                                                                                                                                                                                   |                                                                                                                                                                                                                                                                                                                                                                                                                                                                                                                                                                                                |                                                                                                                                                                                                                                                                                                                                                                                                                                                                                                                                                                            |                                                                                                                                                                                                                                                                                                                                                                                                                                                                                                                                    |                                                                        |              |                                                                                                                                                                                                                                                                                                                                                                                                                                                                                                                                                                                                                                                                                                                                                                                                                                                                                                                                                                                                                                                                                                                                                                                                                                                                                                                                                                                                                                                                                                                                                                                                                                                                                                                   |                                                                                                                        |                                                                                                                        |                                                                          |                                                                                                               |                                                                                                       |                                                                       |                                                                                       |                                                                                      |                                                                          |                                                         |                                                        |                                                              |                                                                         |                                                                                                         |                                                                                         |                                                               |                                                                                             |                                                                                                    |                                                                                |                                                                          |                                                                               |                                                                 |                                                                       |                                                                                                             |                                                                                                                           |
| Level 1                                                                                                                                                                                                                                                                                                                           | Level 2                                                                                                                                                                                                                                                                                                                                                                                                                                                                                                                                                                                        | Level 3                                                                                                                                                                                                                                                                                                                                                                                                                                                                                                                                                                                                                                                                                                                                                                                                                                                                                                                                                                                                                                                                                                                                                                                                                                                                                                                                                                                                                                                                                                                                                                                                                                                                                                                                                                                                                                                                                                                                                                                                                                                                                                                                                                                                                                                                                                                                                                                                                                                                                           | Level 4                                                                                                                                                                                                                                                                                                                                                                                                                                                                                                                            | Level 5                                                                                                                                                                                                                                                                                                                                                                                                                                                                                                                                                                                                                                                                                                                                                                                                                                                                                                                                                                                                                                                                                                                                                                                                                                           |                                                                 |         |         |                                                                                                                                                                                                                                                                                                                                   |                                                                                                                                                                                                                                                                                                                                                                                                                                                                                                                                                                                                |                                                                                                                                                                                                                                                                                                                                                                                                                                                                                                                                                                            |                                                                                                                                                                                                                                                                                                                                                                                                                                                                                                                                    |                                                                        |              |                                                                                                                                                                                                                                                                                                                                                                                                                                                                                                                                                                                                                                                                                                                                                                                                                                                                                                                                                                                                                                                                                                                                                                                                                                                                                                                                                                                                                                                                                                                                                                                                                                                                                                                   |                                                                                                                        |                                                                                                                        |                                                                          |                                                                                                               |                                                                                                       |                                                                       |                                                                                       |                                                                                      |                                                                          |                                                         |                                                        |                                                              |                                                                         |                                                                                                         |                                                                                         |                                                               |                                                                                             |                                                                                                    |                                                                                |                                                                          |                                                                               |                                                                 |                                                                       |                                                                                                             |                                                                                                                           |
| Demonstrates knowledge of the mechanisms of radiation injury and the ALARA ("as low as reasonably achievable") concept                                                                                                                                                                                                            | Applies principles of ALARA in daily practice<br><br>Uses fluoroscopy techniques that decrease exposure, with guidance                                                                                                                                                                                                                                                                                                                                                                                                                                                                         | Accesses resources to determine exam-specific radiation dose information                                                                                                                                                                                                                                                                                                                                                                                                                                                                                                                                                                                                                                                                                                                                                                                                                                                                                                                                                                                                                                                                                                                                                                                                                                                                                                                                                                                                                                                                                                                                                                                                                                                                                                                                                                                                                                                                                                                                                                                                                                                                                                                                                                                                                                                                                                                                                                                                                          | Communicates the relative risk and benefits of exam-specific radiation exposure to patients and practitioners                                                                                                                                                                                                                                                                                                                                                                                                                      | Creates, implements, and assesses radiation safety initiatives at the institutional level                                                                                                                                                                                                                                                                                                                                                                                                                                                                                                                                                                                                                                                                                                                                                                                                                                                                                                                                                                                                                                                                                                                                                         |                                                                 |         |         |                                                                                                                                                                                                                                                                                                                                   |                                                                                                                                                                                                                                                                                                                                                                                                                                                                                                                                                                                                |                                                                                                                                                                                                                                                                                                                                                                                                                                                                                                                                                                            |                                                                                                                                                                                                                                                                                                                                                                                                                                                                                                                                    |                                                                        |              |                                                                                                                                                                                                                                                                                                                                                                                                                                                                                                                                                                                                                                                                                                                                                                                                                                                                                                                                                                                                                                                                                                                                                                                                                                                                                                                                                                                                                                                                                                                                                                                                                                                                                                                   |                                                                                                                        |                                                                                                                        |                                                                          |                                                                                                               |                                                                                                       |                                                                       |                                                                                       |                                                                                      |                                                                          |                                                         |                                                        |                                                              |                                                                         |                                                                                                         |                                                                                         |                                                               |                                                                                             |                                                                                                    |                                                                                |                                                                          |                                                                               |                                                                 |                                                                       |                                                                                                             |                                                                                                                           |
| Wears lead apron and dosimeter at all times                                                                                                                                                                                                                                                                                       | Uses radiation protection devices, including shielding, as appropriate, with guidance                                                                                                                                                                                                                                                                                                                                                                                                                                                                                                          | Independently uses radiation protection devices, including shielding, as appropriate                                                                                                                                                                                                                                                                                                                                                                                                                                                                                                                                                                                                                                                                                                                                                                                                                                                                                                                                                                                                                                                                                                                                                                                                                                                                                                                                                                                                                                                                                                                                                                                                                                                                                                                                                                                                                                                                                                                                                                                                                                                                                                                                                                                                                                                                                                                                                                                                              | Counsels colleagues and allied health staff regarding radiation exposure                                                                                                                                                                                                                                                                                                                                                                                                                                                           | Participates in radiation safety education and research                                                                                                                                                                                                                                                                                                                                                                                                                                                                                                                                                                                                                                                                                                                                                                                                                                                                                                                                                                                                                                                                                                                                                                                           |                                                                 |         |         |                                                                                                                                                                                                                                                                                                                                   |                                                                                                                                                                                                                                                                                                                                                                                                                                                                                                                                                                                                |                                                                                                                                                                                                                                                                                                                                                                                                                                                                                                                                                                            |                                                                                                                                                                                                                                                                                                                                                                                                                                                                                                                                    |                                                                        |              |                                                                                                                                                                                                                                                                                                                                                                                                                                                                                                                                                                                                                                                                                                                                                                                                                                                                                                                                                                                                                                                                                                                                                                                                                                                                                                                                                                                                                                                                                                                                                                                                                                                                                                                   |                                                                                                                        |                                                                                                                        |                                                                          |                                                                                                               |                                                                                                       |                                                                       |                                                                                       |                                                                                      |                                                                          |                                                         |                                                        |                                                              |                                                                         |                                                                                                         |                                                                                         |                                                               |                                                                                             |                                                                                                    |                                                                                |                                                                          |                                                                               |                                                                 |                                                                       |                                                                                                             |                                                                                                                           |
| Medical Genetics and Genomics                                                                                                                                                                                                                                                                                                     | HC Systems<br><br>HC Costs                                                                                                                                                                                                                                                                                                                                                                                                                                                                                                                                                                     | <p>Function effectively within the larger context of health care systems, and practice cost-effective medicine — Systems-based Practice</p> <table border="1"> <thead> <tr> <th>Level 1</th> <th>Level 2</th> <th>Level 3</th> <th>Level 4</th> <th>Level 5</th> </tr> </thead> <tbody> <tr> <td> <ul style="list-style-type: none"> <li>Recognizes how health care systems influence individual practice and patient care</li> <li>Sensitive to cost-effectiveness of care</li> <li>Recognizes that diagnosis and management have implications for care at home and in the community across the lifespan of the patient</li> </ul> </td> <td> <ul style="list-style-type: none"> <li>Functions effectively within different systems with substantial guidance</li> <li>Incorporates and advocates for genetics services to enhance cost-effectiveness of care with substantial guidance</li> <li>Recognizes and manages the variation in access to genetic testing with substantial guidance</li> <li>Facilitates management and transitions of care teams as the patient ages with substantial guidance</li> <li>Participates in identifying system errors and implementing potential system solutions with substantial guidance</li> </ul> </td> <td> <ul style="list-style-type: none"> <li>Functions effectively within different systems with minimal guidance</li> <li>Incorporates and advocates for genetics services to enhance cost-effectiveness of care with minimal guidance</li> <li>Recognizes and manages the variation in access to genetic testing with minimal guidance</li> <li>Facilitates management and transitions of care teams as the patient ages with minimal guidance</li> <li>Participates in identifying system errors and implementing potential system solutions with minimal guidance</li> </ul> </td> <td> <ul style="list-style-type: none"> <li>Independently functions effectively within different systems</li> <li>Independently incorporates and advocates for genetics services to enhance cost-effectiveness of care</li> <li>Independently recognizes and manages the variation in access to genetic testing</li> <li>Independently facilitates management and transitions of care teams as the patient ages</li> <li>Independently participates in identifying system errors and implementing potential system solutions</li> </ul> </td> <td> <ul style="list-style-type: none"> <li>Leads systems change</li> </ul> </td> </tr> </tbody> </table> | Level 1                                                                                                                                                                                                                                                                                                                                                                                                                                                                                                                            | Level 2                                                                                                                                                                                                                                                                                                                                                                                                                                                                                                                                                                                                                                                                                                                                                                                                                                                                                                                                                                                                                                                                                                                                                                                                                                           | Level 3                                                         | Level 4 | Level 5 | <ul style="list-style-type: none"> <li>Recognizes how health care systems influence individual practice and patient care</li> <li>Sensitive to cost-effectiveness of care</li> <li>Recognizes that diagnosis and management have implications for care at home and in the community across the lifespan of the patient</li> </ul> | <ul style="list-style-type: none"> <li>Functions effectively within different systems with substantial guidance</li> <li>Incorporates and advocates for genetics services to enhance cost-effectiveness of care with substantial guidance</li> <li>Recognizes and manages the variation in access to genetic testing with substantial guidance</li> <li>Facilitates management and transitions of care teams as the patient ages with substantial guidance</li> <li>Participates in identifying system errors and implementing potential system solutions with substantial guidance</li> </ul> | <ul style="list-style-type: none"> <li>Functions effectively within different systems with minimal guidance</li> <li>Incorporates and advocates for genetics services to enhance cost-effectiveness of care with minimal guidance</li> <li>Recognizes and manages the variation in access to genetic testing with minimal guidance</li> <li>Facilitates management and transitions of care teams as the patient ages with minimal guidance</li> <li>Participates in identifying system errors and implementing potential system solutions with minimal guidance</li> </ul> | <ul style="list-style-type: none"> <li>Independently functions effectively within different systems</li> <li>Independently incorporates and advocates for genetics services to enhance cost-effectiveness of care</li> <li>Independently recognizes and manages the variation in access to genetic testing</li> <li>Independently facilitates management and transitions of care teams as the patient ages</li> <li>Independently participates in identifying system errors and implementing potential system solutions</li> </ul> | <ul style="list-style-type: none"> <li>Leads systems change</li> </ul> | PS<br><br>QI | <table border="1"> <thead> <tr> <th colspan="5">Systems-Based Practice 1: Patient Safety and Quality Improvement</th> </tr> <tr> <th>Level 1</th> <th>Level 2</th> <th>Level 3</th> <th>Level 4</th> <th>Level 5</th> </tr> </thead> <tbody> <tr> <td>Demonstrates knowledge of common patient safety events</td> <td>Identifies system factors that lead to patient safety events</td> <td>Participates in analysis of patient safety events (simulated or actual)</td> <td>Conducts analysis of patient safety events and offers error prevention strategies (simulated or actual)</td> <td>Actively engages teams and processes to modify systems to prevent patient safety events</td> </tr> <tr> <td>Demonstrates knowledge of how to report patient safety events</td> <td>Reports patient safety events through institutional reporting systems (simulated or actual)</td> <td>Participates in disclosure of patient safety events to patients and families (simulated or actual)</td> <td>Discloses patient safety events to patients and families (simulated or actual)</td> <td>Role models or mentors others in the disclosure of patient safety events</td> </tr> <tr> <td>Demonstrates knowledge of basic quality improvement methodologies and metrics</td> <td>Describes local (institutional) quality improvement initiatives</td> <td>Participates in local (institutional) quality improvement initiatives</td> <td>Demonstrates the skills required to identify, develop, implement, and analyze a quality improvement project</td> <td>Creates, implements, and assesses quality improvement initiatives at the institutional or community (state/federal) level</td> </tr> </tbody> </table> | Systems-Based Practice 1: Patient Safety and Quality Improvement                                                       |                                                                                                                        |                                                                          |                                                                                                               |                                                                                                       | Level 1                                                               | Level 2                                                                               | Level 3                                                                              | Level 4                                                                  | Level 5                                                 | Demonstrates knowledge of common patient safety events | Identifies system factors that lead to patient safety events | Participates in analysis of patient safety events (simulated or actual) | Conducts analysis of patient safety events and offers error prevention strategies (simulated or actual) | Actively engages teams and processes to modify systems to prevent patient safety events | Demonstrates knowledge of how to report patient safety events | Reports patient safety events through institutional reporting systems (simulated or actual) | Participates in disclosure of patient safety events to patients and families (simulated or actual) | Discloses patient safety events to patients and families (simulated or actual) | Role models or mentors others in the disclosure of patient safety events | Demonstrates knowledge of basic quality improvement methodologies and metrics | Describes local (institutional) quality improvement initiatives | Participates in local (institutional) quality improvement initiatives | Demonstrates the skills required to identify, develop, implement, and analyze a quality improvement project | Creates, implements, and assesses quality improvement initiatives at the institutional or community (state/federal) level |
| Level 1                                                                                                                                                                                                                                                                                                                           | Level 2                                                                                                                                                                                                                                                                                                                                                                                                                                                                                                                                                                                        | Level 3                                                                                                                                                                                                                                                                                                                                                                                                                                                                                                                                                                                                                                                                                                                                                                                                                                                                                                                                                                                                                                                                                                                                                                                                                                                                                                                                                                                                                                                                                                                                                                                                                                                                                                                                                                                                                                                                                                                                                                                                                                                                                                                                                                                                                                                                                                                                                                                                                                                                                           | Level 4                                                                                                                                                                                                                                                                                                                                                                                                                                                                                                                            | Level 5                                                                                                                                                                                                                                                                                                                                                                                                                                                                                                                                                                                                                                                                                                                                                                                                                                                                                                                                                                                                                                                                                                                                                                                                                                           |                                                                 |         |         |                                                                                                                                                                                                                                                                                                                                   |                                                                                                                                                                                                                                                                                                                                                                                                                                                                                                                                                                                                |                                                                                                                                                                                                                                                                                                                                                                                                                                                                                                                                                                            |                                                                                                                                                                                                                                                                                                                                                                                                                                                                                                                                    |                                                                        |              |                                                                                                                                                                                                                                                                                                                                                                                                                                                                                                                                                                                                                                                                                                                                                                                                                                                                                                                                                                                                                                                                                                                                                                                                                                                                                                                                                                                                                                                                                                                                                                                                                                                                                                                   |                                                                                                                        |                                                                                                                        |                                                                          |                                                                                                               |                                                                                                       |                                                                       |                                                                                       |                                                                                      |                                                                          |                                                         |                                                        |                                                              |                                                                         |                                                                                                         |                                                                                         |                                                               |                                                                                             |                                                                                                    |                                                                                |                                                                          |                                                                               |                                                                 |                                                                       |                                                                                                             |                                                                                                                           |
| <ul style="list-style-type: none"> <li>Recognizes how health care systems influence individual practice and patient care</li> <li>Sensitive to cost-effectiveness of care</li> <li>Recognizes that diagnosis and management have implications for care at home and in the community across the lifespan of the patient</li> </ul> | <ul style="list-style-type: none"> <li>Functions effectively within different systems with substantial guidance</li> <li>Incorporates and advocates for genetics services to enhance cost-effectiveness of care with substantial guidance</li> <li>Recognizes and manages the variation in access to genetic testing with substantial guidance</li> <li>Facilitates management and transitions of care teams as the patient ages with substantial guidance</li> <li>Participates in identifying system errors and implementing potential system solutions with substantial guidance</li> </ul> | <ul style="list-style-type: none"> <li>Functions effectively within different systems with minimal guidance</li> <li>Incorporates and advocates for genetics services to enhance cost-effectiveness of care with minimal guidance</li> <li>Recognizes and manages the variation in access to genetic testing with minimal guidance</li> <li>Facilitates management and transitions of care teams as the patient ages with minimal guidance</li> <li>Participates in identifying system errors and implementing potential system solutions with minimal guidance</li> </ul>                                                                                                                                                                                                                                                                                                                                                                                                                                                                                                                                                                                                                                                                                                                                                                                                                                                                                                                                                                                                                                                                                                                                                                                                                                                                                                                                                                                                                                                                                                                                                                                                                                                                                                                                                                                                                                                                                                                        | <ul style="list-style-type: none"> <li>Independently functions effectively within different systems</li> <li>Independently incorporates and advocates for genetics services to enhance cost-effectiveness of care</li> <li>Independently recognizes and manages the variation in access to genetic testing</li> <li>Independently facilitates management and transitions of care teams as the patient ages</li> <li>Independently participates in identifying system errors and implementing potential system solutions</li> </ul> | <ul style="list-style-type: none"> <li>Leads systems change</li> </ul>                                                                                                                                                                                                                                                                                                                                                                                                                                                                                                                                                                                                                                                                                                                                                                                                                                                                                                                                                                                                                                                                                                                                                                            |                                                                 |         |         |                                                                                                                                                                                                                                                                                                                                   |                                                                                                                                                                                                                                                                                                                                                                                                                                                                                                                                                                                                |                                                                                                                                                                                                                                                                                                                                                                                                                                                                                                                                                                            |                                                                                                                                                                                                                                                                                                                                                                                                                                                                                                                                    |                                                                        |              |                                                                                                                                                                                                                                                                                                                                                                                                                                                                                                                                                                                                                                                                                                                                                                                                                                                                                                                                                                                                                                                                                                                                                                                                                                                                                                                                                                                                                                                                                                                                                                                                                                                                                                                   |                                                                                                                        |                                                                                                                        |                                                                          |                                                                                                               |                                                                                                       |                                                                       |                                                                                       |                                                                                      |                                                                          |                                                         |                                                        |                                                              |                                                                         |                                                                                                         |                                                                                         |                                                               |                                                                                             |                                                                                                    |                                                                                |                                                                          |                                                                               |                                                                 |                                                                       |                                                                                                             |                                                                                                                           |
| Systems-Based Practice 1: Patient Safety and Quality Improvement                                                                                                                                                                                                                                                                  |                                                                                                                                                                                                                                                                                                                                                                                                                                                                                                                                                                                                |                                                                                                                                                                                                                                                                                                                                                                                                                                                                                                                                                                                                                                                                                                                                                                                                                                                                                                                                                                                                                                                                                                                                                                                                                                                                                                                                                                                                                                                                                                                                                                                                                                                                                                                                                                                                                                                                                                                                                                                                                                                                                                                                                                                                                                                                                                                                                                                                                                                                                                   |                                                                                                                                                                                                                                                                                                                                                                                                                                                                                                                                    |                                                                                                                                                                                                                                                                                                                                                                                                                                                                                                                                                                                                                                                                                                                                                                                                                                                                                                                                                                                                                                                                                                                                                                                                                                                   |                                                                 |         |         |                                                                                                                                                                                                                                                                                                                                   |                                                                                                                                                                                                                                                                                                                                                                                                                                                                                                                                                                                                |                                                                                                                                                                                                                                                                                                                                                                                                                                                                                                                                                                            |                                                                                                                                                                                                                                                                                                                                                                                                                                                                                                                                    |                                                                        |              |                                                                                                                                                                                                                                                                                                                                                                                                                                                                                                                                                                                                                                                                                                                                                                                                                                                                                                                                                                                                                                                                                                                                                                                                                                                                                                                                                                                                                                                                                                                                                                                                                                                                                                                   |                                                                                                                        |                                                                                                                        |                                                                          |                                                                                                               |                                                                                                       |                                                                       |                                                                                       |                                                                                      |                                                                          |                                                         |                                                        |                                                              |                                                                         |                                                                                                         |                                                                                         |                                                               |                                                                                             |                                                                                                    |                                                                                |                                                                          |                                                                               |                                                                 |                                                                       |                                                                                                             |                                                                                                                           |
| Level 1                                                                                                                                                                                                                                                                                                                           | Level 2                                                                                                                                                                                                                                                                                                                                                                                                                                                                                                                                                                                        | Level 3                                                                                                                                                                                                                                                                                                                                                                                                                                                                                                                                                                                                                                                                                                                                                                                                                                                                                                                                                                                                                                                                                                                                                                                                                                                                                                                                                                                                                                                                                                                                                                                                                                                                                                                                                                                                                                                                                                                                                                                                                                                                                                                                                                                                                                                                                                                                                                                                                                                                                           | Level 4                                                                                                                                                                                                                                                                                                                                                                                                                                                                                                                            | Level 5                                                                                                                                                                                                                                                                                                                                                                                                                                                                                                                                                                                                                                                                                                                                                                                                                                                                                                                                                                                                                                                                                                                                                                                                                                           |                                                                 |         |         |                                                                                                                                                                                                                                                                                                                                   |                                                                                                                                                                                                                                                                                                                                                                                                                                                                                                                                                                                                |                                                                                                                                                                                                                                                                                                                                                                                                                                                                                                                                                                            |                                                                                                                                                                                                                                                                                                                                                                                                                                                                                                                                    |                                                                        |              |                                                                                                                                                                                                                                                                                                                                                                                                                                                                                                                                                                                                                                                                                                                                                                                                                                                                                                                                                                                                                                                                                                                                                                                                                                                                                                                                                                                                                                                                                                                                                                                                                                                                                                                   |                                                                                                                        |                                                                                                                        |                                                                          |                                                                                                               |                                                                                                       |                                                                       |                                                                                       |                                                                                      |                                                                          |                                                         |                                                        |                                                              |                                                                         |                                                                                                         |                                                                                         |                                                               |                                                                                             |                                                                                                    |                                                                                |                                                                          |                                                                               |                                                                 |                                                                       |                                                                                                             |                                                                                                                           |
| Demonstrates knowledge of common patient safety events                                                                                                                                                                                                                                                                            | Identifies system factors that lead to patient safety events                                                                                                                                                                                                                                                                                                                                                                                                                                                                                                                                   | Participates in analysis of patient safety events (simulated or actual)                                                                                                                                                                                                                                                                                                                                                                                                                                                                                                                                                                                                                                                                                                                                                                                                                                                                                                                                                                                                                                                                                                                                                                                                                                                                                                                                                                                                                                                                                                                                                                                                                                                                                                                                                                                                                                                                                                                                                                                                                                                                                                                                                                                                                                                                                                                                                                                                                           | Conducts analysis of patient safety events and offers error prevention strategies (simulated or actual)                                                                                                                                                                                                                                                                                                                                                                                                                            | Actively engages teams and processes to modify systems to prevent patient safety events                                                                                                                                                                                                                                                                                                                                                                                                                                                                                                                                                                                                                                                                                                                                                                                                                                                                                                                                                                                                                                                                                                                                                           |                                                                 |         |         |                                                                                                                                                                                                                                                                                                                                   |                                                                                                                                                                                                                                                                                                                                                                                                                                                                                                                                                                                                |                                                                                                                                                                                                                                                                                                                                                                                                                                                                                                                                                                            |                                                                                                                                                                                                                                                                                                                                                                                                                                                                                                                                    |                                                                        |              |                                                                                                                                                                                                                                                                                                                                                                                                                                                                                                                                                                                                                                                                                                                                                                                                                                                                                                                                                                                                                                                                                                                                                                                                                                                                                                                                                                                                                                                                                                                                                                                                                                                                                                                   |                                                                                                                        |                                                                                                                        |                                                                          |                                                                                                               |                                                                                                       |                                                                       |                                                                                       |                                                                                      |                                                                          |                                                         |                                                        |                                                              |                                                                         |                                                                                                         |                                                                                         |                                                               |                                                                                             |                                                                                                    |                                                                                |                                                                          |                                                                               |                                                                 |                                                                       |                                                                                                             |                                                                                                                           |
| Demonstrates knowledge of how to report patient safety events                                                                                                                                                                                                                                                                     | Reports patient safety events through institutional reporting systems (simulated or actual)                                                                                                                                                                                                                                                                                                                                                                                                                                                                                                    | Participates in disclosure of patient safety events to patients and families (simulated or actual)                                                                                                                                                                                                                                                                                                                                                                                                                                                                                                                                                                                                                                                                                                                                                                                                                                                                                                                                                                                                                                                                                                                                                                                                                                                                                                                                                                                                                                                                                                                                                                                                                                                                                                                                                                                                                                                                                                                                                                                                                                                                                                                                                                                                                                                                                                                                                                                                | Discloses patient safety events to patients and families (simulated or actual)                                                                                                                                                                                                                                                                                                                                                                                                                                                     | Role models or mentors others in the disclosure of patient safety events                                                                                                                                                                                                                                                                                                                                                                                                                                                                                                                                                                                                                                                                                                                                                                                                                                                                                                                                                                                                                                                                                                                                                                          |                                                                 |         |         |                                                                                                                                                                                                                                                                                                                                   |                                                                                                                                                                                                                                                                                                                                                                                                                                                                                                                                                                                                |                                                                                                                                                                                                                                                                                                                                                                                                                                                                                                                                                                            |                                                                                                                                                                                                                                                                                                                                                                                                                                                                                                                                    |                                                                        |              |                                                                                                                                                                                                                                                                                                                                                                                                                                                                                                                                                                                                                                                                                                                                                                                                                                                                                                                                                                                                                                                                                                                                                                                                                                                                                                                                                                                                                                                                                                                                                                                                                                                                                                                   |                                                                                                                        |                                                                                                                        |                                                                          |                                                                                                               |                                                                                                       |                                                                       |                                                                                       |                                                                                      |                                                                          |                                                         |                                                        |                                                              |                                                                         |                                                                                                         |                                                                                         |                                                               |                                                                                             |                                                                                                    |                                                                                |                                                                          |                                                                               |                                                                 |                                                                       |                                                                                                             |                                                                                                                           |
| Demonstrates knowledge of basic quality improvement methodologies and metrics                                                                                                                                                                                                                                                     | Describes local (institutional) quality improvement initiatives                                                                                                                                                                                                                                                                                                                                                                                                                                                                                                                                | Participates in local (institutional) quality improvement initiatives                                                                                                                                                                                                                                                                                                                                                                                                                                                                                                                                                                                                                                                                                                                                                                                                                                                                                                                                                                                                                                                                                                                                                                                                                                                                                                                                                                                                                                                                                                                                                                                                                                                                                                                                                                                                                                                                                                                                                                                                                                                                                                                                                                                                                                                                                                                                                                                                                             | Demonstrates the skills required to identify, develop, implement, and analyze a quality improvement project                                                                                                                                                                                                                                                                                                                                                                                                                        | Creates, implements, and assesses quality improvement initiatives at the institutional or community (state/federal) level                                                                                                                                                                                                                                                                                                                                                                                                                                                                                                                                                                                                                                                                                                                                                                                                                                                                                                                                                                                                                                                                                                                         |                                                                 |         |         |                                                                                                                                                                                                                                                                                                                                   |                                                                                                                                                                                                                                                                                                                                                                                                                                                                                                                                                                                                |                                                                                                                                                                                                                                                                                                                                                                                                                                                                                                                                                                            |                                                                                                                                                                                                                                                                                                                                                                                                                                                                                                                                    |                                                                        |              |                                                                                                                                                                                                                                                                                                                                                                                                                                                                                                                                                                                                                                                                                                                                                                                                                                                                                                                                                                                                                                                                                                                                                                                                                                                                                                                                                                                                                                                                                                                                                                                                                                                                                                                   |                                                                                                                        |                                                                                                                        |                                                                          |                                                                                                               |                                                                                                       |                                                                       |                                                                                       |                                                                                      |                                                                          |                                                         |                                                        |                                                              |                                                                         |                                                                                                         |                                                                                         |                                                               |                                                                                             |                                                                                                    |                                                                                |                                                                          |                                                                               |                                                                 |                                                                       |                                                                                                             |                                                                                                                           |

| <p><b>Medical Genetics and Genomics</b></p>                                                                                                                                                                                                                                                                                                                                                                                | <p>Infor-matics</p>                                                                                                                                                                                                                                                                                                                                                                                                         | <p><b>Use technology to accomplish safe health care delivery – Systems-based Practice</b></p> <table border="1"> <thead> <tr> <th>Level 1</th> <th>Level 2</th> <th>Level 3</th> <th>Level 4</th> <th>Level 5</th> </tr> </thead> <tbody> <tr> <td> <ul style="list-style-type: none"> <li>Utilizes the Electronic Health Record (EHR) and Computerized Physician Order Entry (CPOE) in prevention of medical errors</li> <li>Recognizes the risk added by copy/paste strategies to create notes</li> </ul> </td> <td> <ul style="list-style-type: none"> <li>Documents essential elements of genetics encounters to enhance the transfer of information and patient safety with substantial guidance</li> <li>Utilizes decision support tools with substantial guidance</li> </ul> </td> <td> <ul style="list-style-type: none"> <li>Documents essential elements of genetics encounters to enhance the transfer of information and patient safety with minimal guidance</li> <li>Utilizes decision support tools with substantial guidance</li> </ul> </td> <td> <ul style="list-style-type: none"> <li>Independently documents essential elements of genetics encounters to enhance the transfer of information and patient safety</li> <li>Independently utilizes decision support tools</li> </ul> </td> <td> <ul style="list-style-type: none"> <li>Develops new technologies to improve health care in genetics</li> </ul> </td> </tr> </tbody> </table> | Level 1                                                                                                                                                                                                                                                                                                                                                                                                                                                                                                        | Level 2                                                                                                                                                                                                                                                                                                                                                                                                                                                                                                                                                                                                                                                                                                                                                                                                                                                                                                                                                                                                                                                                                                                                                                                                                                                                                                                                                                                                                                                                                                                                                                                                                                                                                                                                                                                                                                                                                                                                                                                                                                                                                                                                                                                                                                                                                                                           | Level 3 | Level 4 | Level 5 | <ul style="list-style-type: none"> <li>Utilizes the Electronic Health Record (EHR) and Computerized Physician Order Entry (CPOE) in prevention of medical errors</li> <li>Recognizes the risk added by copy/paste strategies to create notes</li> </ul> | <ul style="list-style-type: none"> <li>Documents essential elements of genetics encounters to enhance the transfer of information and patient safety with substantial guidance</li> <li>Utilizes decision support tools with substantial guidance</li> </ul> | <ul style="list-style-type: none"> <li>Documents essential elements of genetics encounters to enhance the transfer of information and patient safety with minimal guidance</li> <li>Utilizes decision support tools with substantial guidance</li> </ul>                                                                                                                                                                   | <ul style="list-style-type: none"> <li>Independently documents essential elements of genetics encounters to enhance the transfer of information and patient safety</li> <li>Independently utilizes decision support tools</li> </ul>                                                                                                                                                                                        | <ul style="list-style-type: none"> <li>Develops new technologies to improve health care in genetics</li> </ul>                                                                                                                                                                                                                                                                                                          | <p>CC</p>                                                                                                                                                                                                                                                                                                                                                                                                                                                             | <p><b>Systems-Based Practice 2: System Navigation for Patient-Centered Care</b></p> <table border="1"> <thead> <tr> <th>Level 1</th> <th>Level 2</th> <th>Level 3</th> <th>Level 4</th> <th>Level 5</th> </tr> </thead> <tbody> <tr> <td> <p>Demonstrates knowledge of care coordination</p> <p>Identifies key elements for safe and effective transitions of care and hand-offs</p> <p>Demonstrates knowledge of population and community health needs and disparities</p> </td> <td> <p>Coordinates care of patients in routine clinical situations effectively using the roles of the interprofessional teams, including non-physician patient caregivers</p> <p>Performs safe and effective transitions of care/hand-offs in routine clinical situations</p> <p>Identifies specific population and community health needs and inequities for the local population</p> </td> <td> <p>Coordinates care of patients in complex situations effectively using the roles of the interprofessional teams</p> <p>Performs safe and effective transitions of care/hand-offs in complex clinical situations</p> <p>Uses local resources effectively to meet the needs of a patient population and community</p> </td> <td> <p>Role models effective coordination of patient-centered care among different disciplines and specialties including referrals and testing</p> <p>Role models and advocates for safe and effective transitions of care/hand-offs within and across health care delivery systems including outpatient settings, referrals, and testing</p> <p>Participates in changing and adapting practice to provide for the needs of specific populations including advocating for a patient's genetic testing coverage</p> </td> <td> <p>Analyzes the process of care coordination and leads in the design and implementation of improvements</p> <p>Improves quality of transitions of care within and across health care delivery systems to optimize patient outcomes</p> <p>Leads innovations and advocates for populations and communities with health care inequities at the state or federal level</p> </td> </tr> </tbody> </table> | Level 1 | Level 2 | Level 3 | Level 4 | Level 5 | <p>Demonstrates knowledge of care coordination</p> <p>Identifies key elements for safe and effective transitions of care and hand-offs</p> <p>Demonstrates knowledge of population and community health needs and disparities</p> | <p>Coordinates care of patients in routine clinical situations effectively using the roles of the interprofessional teams, including non-physician patient caregivers</p> <p>Performs safe and effective transitions of care/hand-offs in routine clinical situations</p> <p>Identifies specific population and community health needs and inequities for the local population</p> | <p>Coordinates care of patients in complex situations effectively using the roles of the interprofessional teams</p> <p>Performs safe and effective transitions of care/hand-offs in complex clinical situations</p> <p>Uses local resources effectively to meet the needs of a patient population and community</p> | <p>Role models effective coordination of patient-centered care among different disciplines and specialties including referrals and testing</p> <p>Role models and advocates for safe and effective transitions of care/hand-offs within and across health care delivery systems including outpatient settings, referrals, and testing</p> <p>Participates in changing and adapting practice to provide for the needs of specific populations including advocating for a patient's genetic testing coverage</p> | <p>Analyzes the process of care coordination and leads in the design and implementation of improvements</p> <p>Improves quality of transitions of care within and across health care delivery systems to optimize patient outcomes</p> <p>Leads innovations and advocates for populations and communities with health care inequities at the state or federal level</p> |
|----------------------------------------------------------------------------------------------------------------------------------------------------------------------------------------------------------------------------------------------------------------------------------------------------------------------------------------------------------------------------------------------------------------------------|-----------------------------------------------------------------------------------------------------------------------------------------------------------------------------------------------------------------------------------------------------------------------------------------------------------------------------------------------------------------------------------------------------------------------------|-----------------------------------------------------------------------------------------------------------------------------------------------------------------------------------------------------------------------------------------------------------------------------------------------------------------------------------------------------------------------------------------------------------------------------------------------------------------------------------------------------------------------------------------------------------------------------------------------------------------------------------------------------------------------------------------------------------------------------------------------------------------------------------------------------------------------------------------------------------------------------------------------------------------------------------------------------------------------------------------------------------------------------------------------------------------------------------------------------------------------------------------------------------------------------------------------------------------------------------------------------------------------------------------------------------------------------------------------------------------------------------------------------------------------------------------------------------------|----------------------------------------------------------------------------------------------------------------------------------------------------------------------------------------------------------------------------------------------------------------------------------------------------------------------------------------------------------------------------------------------------------------------------------------------------------------------------------------------------------------|-----------------------------------------------------------------------------------------------------------------------------------------------------------------------------------------------------------------------------------------------------------------------------------------------------------------------------------------------------------------------------------------------------------------------------------------------------------------------------------------------------------------------------------------------------------------------------------------------------------------------------------------------------------------------------------------------------------------------------------------------------------------------------------------------------------------------------------------------------------------------------------------------------------------------------------------------------------------------------------------------------------------------------------------------------------------------------------------------------------------------------------------------------------------------------------------------------------------------------------------------------------------------------------------------------------------------------------------------------------------------------------------------------------------------------------------------------------------------------------------------------------------------------------------------------------------------------------------------------------------------------------------------------------------------------------------------------------------------------------------------------------------------------------------------------------------------------------------------------------------------------------------------------------------------------------------------------------------------------------------------------------------------------------------------------------------------------------------------------------------------------------------------------------------------------------------------------------------------------------------------------------------------------------------------------------------------------------|---------|---------|---------|---------------------------------------------------------------------------------------------------------------------------------------------------------------------------------------------------------------------------------------------------------|--------------------------------------------------------------------------------------------------------------------------------------------------------------------------------------------------------------------------------------------------------------|----------------------------------------------------------------------------------------------------------------------------------------------------------------------------------------------------------------------------------------------------------------------------------------------------------------------------------------------------------------------------------------------------------------------------|-----------------------------------------------------------------------------------------------------------------------------------------------------------------------------------------------------------------------------------------------------------------------------------------------------------------------------------------------------------------------------------------------------------------------------|-------------------------------------------------------------------------------------------------------------------------------------------------------------------------------------------------------------------------------------------------------------------------------------------------------------------------------------------------------------------------------------------------------------------------|-----------------------------------------------------------------------------------------------------------------------------------------------------------------------------------------------------------------------------------------------------------------------------------------------------------------------------------------------------------------------------------------------------------------------------------------------------------------------|------------------------------------------------------------------------------------------------------------------------------------------------------------------------------------------------------------------------------------------------------------------------------------------------------------------------------------------------------------------------------------------------------------------------------------------------------------------------------------------------------------------------------------------------------------------------------------------------------------------------------------------------------------------------------------------------------------------------------------------------------------------------------------------------------------------------------------------------------------------------------------------------------------------------------------------------------------------------------------------------------------------------------------------------------------------------------------------------------------------------------------------------------------------------------------------------------------------------------------------------------------------------------------------------------------------------------------------------------------------------------------------------------------------------------------------------------------------------------------------------------------------------------------------------------------------------------------------------------------------------------------------------------------------------------------------------------------------------------------------------------------------------------------------------------------------------------------------------------------------------------------------------------------------------------------------------------------------------------------------------------------------------------------------------------------------------------------------------------------------------------------------------------|---------|---------|---------|---------|---------|-----------------------------------------------------------------------------------------------------------------------------------------------------------------------------------------------------------------------------------|------------------------------------------------------------------------------------------------------------------------------------------------------------------------------------------------------------------------------------------------------------------------------------------------------------------------------------------------------------------------------------|----------------------------------------------------------------------------------------------------------------------------------------------------------------------------------------------------------------------------------------------------------------------------------------------------------------------|----------------------------------------------------------------------------------------------------------------------------------------------------------------------------------------------------------------------------------------------------------------------------------------------------------------------------------------------------------------------------------------------------------------------------------------------------------------------------------------------------------------|-------------------------------------------------------------------------------------------------------------------------------------------------------------------------------------------------------------------------------------------------------------------------------------------------------------------------------------------------------------------------|
| Level 1                                                                                                                                                                                                                                                                                                                                                                                                                    | Level 2                                                                                                                                                                                                                                                                                                                                                                                                                     | Level 3                                                                                                                                                                                                                                                                                                                                                                                                                                                                                                                                                                                                                                                                                                                                                                                                                                                                                                                                                                                                                                                                                                                                                                                                                                                                                                                                                                                                                                                         | Level 4                                                                                                                                                                                                                                                                                                                                                                                                                                                                                                        | Level 5                                                                                                                                                                                                                                                                                                                                                                                                                                                                                                                                                                                                                                                                                                                                                                                                                                                                                                                                                                                                                                                                                                                                                                                                                                                                                                                                                                                                                                                                                                                                                                                                                                                                                                                                                                                                                                                                                                                                                                                                                                                                                                                                                                                                                                                                                                                           |         |         |         |                                                                                                                                                                                                                                                         |                                                                                                                                                                                                                                                              |                                                                                                                                                                                                                                                                                                                                                                                                                            |                                                                                                                                                                                                                                                                                                                                                                                                                             |                                                                                                                                                                                                                                                                                                                                                                                                                         |                                                                                                                                                                                                                                                                                                                                                                                                                                                                       |                                                                                                                                                                                                                                                                                                                                                                                                                                                                                                                                                                                                                                                                                                                                                                                                                                                                                                                                                                                                                                                                                                                                                                                                                                                                                                                                                                                                                                                                                                                                                                                                                                                                                                                                                                                                                                                                                                                                                                                                                                                                                                                                                      |         |         |         |         |         |                                                                                                                                                                                                                                   |                                                                                                                                                                                                                                                                                                                                                                                    |                                                                                                                                                                                                                                                                                                                      |                                                                                                                                                                                                                                                                                                                                                                                                                                                                                                                |                                                                                                                                                                                                                                                                                                                                                                         |
| <ul style="list-style-type: none"> <li>Utilizes the Electronic Health Record (EHR) and Computerized Physician Order Entry (CPOE) in prevention of medical errors</li> <li>Recognizes the risk added by copy/paste strategies to create notes</li> </ul>                                                                                                                                                                    | <ul style="list-style-type: none"> <li>Documents essential elements of genetics encounters to enhance the transfer of information and patient safety with substantial guidance</li> <li>Utilizes decision support tools with substantial guidance</li> </ul>                                                                                                                                                                | <ul style="list-style-type: none"> <li>Documents essential elements of genetics encounters to enhance the transfer of information and patient safety with minimal guidance</li> <li>Utilizes decision support tools with substantial guidance</li> </ul>                                                                                                                                                                                                                                                                                                                                                                                                                                                                                                                                                                                                                                                                                                                                                                                                                                                                                                                                                                                                                                                                                                                                                                                                        | <ul style="list-style-type: none"> <li>Independently documents essential elements of genetics encounters to enhance the transfer of information and patient safety</li> <li>Independently utilizes decision support tools</li> </ul>                                                                                                                                                                                                                                                                           | <ul style="list-style-type: none"> <li>Develops new technologies to improve health care in genetics</li> </ul>                                                                                                                                                                                                                                                                                                                                                                                                                                                                                                                                                                                                                                                                                                                                                                                                                                                                                                                                                                                                                                                                                                                                                                                                                                                                                                                                                                                                                                                                                                                                                                                                                                                                                                                                                                                                                                                                                                                                                                                                                                                                                                                                                                                                                    |         |         |         |                                                                                                                                                                                                                                                         |                                                                                                                                                                                                                                                              |                                                                                                                                                                                                                                                                                                                                                                                                                            |                                                                                                                                                                                                                                                                                                                                                                                                                             |                                                                                                                                                                                                                                                                                                                                                                                                                         |                                                                                                                                                                                                                                                                                                                                                                                                                                                                       |                                                                                                                                                                                                                                                                                                                                                                                                                                                                                                                                                                                                                                                                                                                                                                                                                                                                                                                                                                                                                                                                                                                                                                                                                                                                                                                                                                                                                                                                                                                                                                                                                                                                                                                                                                                                                                                                                                                                                                                                                                                                                                                                                      |         |         |         |         |         |                                                                                                                                                                                                                                   |                                                                                                                                                                                                                                                                                                                                                                                    |                                                                                                                                                                                                                                                                                                                      |                                                                                                                                                                                                                                                                                                                                                                                                                                                                                                                |                                                                                                                                                                                                                                                                                                                                                                         |
| Level 1                                                                                                                                                                                                                                                                                                                                                                                                                    | Level 2                                                                                                                                                                                                                                                                                                                                                                                                                     | Level 3                                                                                                                                                                                                                                                                                                                                                                                                                                                                                                                                                                                                                                                                                                                                                                                                                                                                                                                                                                                                                                                                                                                                                                                                                                                                                                                                                                                                                                                         | Level 4                                                                                                                                                                                                                                                                                                                                                                                                                                                                                                        | Level 5                                                                                                                                                                                                                                                                                                                                                                                                                                                                                                                                                                                                                                                                                                                                                                                                                                                                                                                                                                                                                                                                                                                                                                                                                                                                                                                                                                                                                                                                                                                                                                                                                                                                                                                                                                                                                                                                                                                                                                                                                                                                                                                                                                                                                                                                                                                           |         |         |         |                                                                                                                                                                                                                                                         |                                                                                                                                                                                                                                                              |                                                                                                                                                                                                                                                                                                                                                                                                                            |                                                                                                                                                                                                                                                                                                                                                                                                                             |                                                                                                                                                                                                                                                                                                                                                                                                                         |                                                                                                                                                                                                                                                                                                                                                                                                                                                                       |                                                                                                                                                                                                                                                                                                                                                                                                                                                                                                                                                                                                                                                                                                                                                                                                                                                                                                                                                                                                                                                                                                                                                                                                                                                                                                                                                                                                                                                                                                                                                                                                                                                                                                                                                                                                                                                                                                                                                                                                                                                                                                                                                      |         |         |         |         |         |                                                                                                                                                                                                                                   |                                                                                                                                                                                                                                                                                                                                                                                    |                                                                                                                                                                                                                                                                                                                      |                                                                                                                                                                                                                                                                                                                                                                                                                                                                                                                |                                                                                                                                                                                                                                                                                                                                                                         |
| <p>Demonstrates knowledge of care coordination</p> <p>Identifies key elements for safe and effective transitions of care and hand-offs</p> <p>Demonstrates knowledge of population and community health needs and disparities</p>                                                                                                                                                                                          | <p>Coordinates care of patients in routine clinical situations effectively using the roles of the interprofessional teams, including non-physician patient caregivers</p> <p>Performs safe and effective transitions of care/hand-offs in routine clinical situations</p> <p>Identifies specific population and community health needs and inequities for the local population</p>                                          | <p>Coordinates care of patients in complex situations effectively using the roles of the interprofessional teams</p> <p>Performs safe and effective transitions of care/hand-offs in complex clinical situations</p> <p>Uses local resources effectively to meet the needs of a patient population and community</p>                                                                                                                                                                                                                                                                                                                                                                                                                                                                                                                                                                                                                                                                                                                                                                                                                                                                                                                                                                                                                                                                                                                                            | <p>Role models effective coordination of patient-centered care among different disciplines and specialties including referrals and testing</p> <p>Role models and advocates for safe and effective transitions of care/hand-offs within and across health care delivery systems including outpatient settings, referrals, and testing</p> <p>Participates in changing and adapting practice to provide for the needs of specific populations including advocating for a patient's genetic testing coverage</p> | <p>Analyzes the process of care coordination and leads in the design and implementation of improvements</p> <p>Improves quality of transitions of care within and across health care delivery systems to optimize patient outcomes</p> <p>Leads innovations and advocates for populations and communities with health care inequities at the state or federal level</p>                                                                                                                                                                                                                                                                                                                                                                                                                                                                                                                                                                                                                                                                                                                                                                                                                                                                                                                                                                                                                                                                                                                                                                                                                                                                                                                                                                                                                                                                                                                                                                                                                                                                                                                                                                                                                                                                                                                                                           |         |         |         |                                                                                                                                                                                                                                                         |                                                                                                                                                                                                                                                              |                                                                                                                                                                                                                                                                                                                                                                                                                            |                                                                                                                                                                                                                                                                                                                                                                                                                             |                                                                                                                                                                                                                                                                                                                                                                                                                         |                                                                                                                                                                                                                                                                                                                                                                                                                                                                       |                                                                                                                                                                                                                                                                                                                                                                                                                                                                                                                                                                                                                                                                                                                                                                                                                                                                                                                                                                                                                                                                                                                                                                                                                                                                                                                                                                                                                                                                                                                                                                                                                                                                                                                                                                                                                                                                                                                                                                                                                                                                                                                                                      |         |         |         |         |         |                                                                                                                                                                                                                                   |                                                                                                                                                                                                                                                                                                                                                                                    |                                                                                                                                                                                                                                                                                                                      |                                                                                                                                                                                                                                                                                                                                                                                                                                                                                                                |                                                                                                                                                                                                                                                                                                                                                                         |
| <p><b>Medical Genetics and Genomics</b></p>                                                                                                                                                                                                                                                                                                                                                                                |                                                                                                                                                                                                                                                                                                                                                                                                                             |                                                                                                                                                                                                                                                                                                                                                                                                                                                                                                                                                                                                                                                                                                                                                                                                                                                                                                                                                                                                                                                                                                                                                                                                                                                                                                                                                                                                                                                                 | <p>HC Systems</p>                                                                                                                                                                                                                                                                                                                                                                                                                                                                                              | <p><b>Systems-Based Practice 3: Physician Role in Health Care Systems</b></p> <table border="1"> <thead> <tr> <th>Level 1</th> <th>Level 2</th> <th>Level 3</th> <th>Level 4</th> <th>Level 5</th> </tr> </thead> <tbody> <tr> <td> <p>Identifies key components of the complex health care system (e.g., hospital, skilled nursing facility, finance, personnel, technology)</p> <p>Describes basic health payment systems (e.g., government, private, public, uninsured care) and practice models</p> <p>Identifies basic knowledge for effective transition to practice (e.g., information technology, legal, billing and coding, financial, personnel)</p> </td> <td> <p>Describes how components of a complex health care system are interrelated, and how this impacts patient care</p> <p>Delivers care with consideration of each patient's payment model (e.g., insurance type) and access to genetic testing or formula</p> <p>Demonstrates use of information technology required for medical practice (e.g., electronic health record, documentation required for billing and coding)</p> </td> <td> <p>Discusses how individual practice affects the broader system (e.g., access to genetic testing and treatments, testing advocacy)</p> <p>Engages with patients in shared decision making, often informed by each patient's payment models</p> <p>Describes core administrative knowledge needed for transition to practice (e.g., contract negotiations, malpractice insurance, government regulation, compliance)</p> </td> <td> <p>Manages various components of the complex health care system to provide efficient and effective patient care and transition of care</p> <p>Advocates for patient care needs (e.g., community resources, patient assistance resources) with consideration of the limitations of each patient's payment model, including genetic testing through research</p> <p>Analyzes individual practice patterns and professional requirements in preparation for practice</p> </td> <td> <p>Advocates for or leads systems change that enhances high-value, efficient, and effective patient care and transition of care</p> <p>Participates in health policy advocacy activities</p> <p>Educates others to prepare them for transition to practice</p> </td> </tr> </tbody> </table> | Level 1 | Level 2 | Level 3 | Level 4                                                                                                                                                                                                                                                 | Level 5                                                                                                                                                                                                                                                      | <p>Identifies key components of the complex health care system (e.g., hospital, skilled nursing facility, finance, personnel, technology)</p> <p>Describes basic health payment systems (e.g., government, private, public, uninsured care) and practice models</p> <p>Identifies basic knowledge for effective transition to practice (e.g., information technology, legal, billing and coding, financial, personnel)</p> | <p>Describes how components of a complex health care system are interrelated, and how this impacts patient care</p> <p>Delivers care with consideration of each patient's payment model (e.g., insurance type) and access to genetic testing or formula</p> <p>Demonstrates use of information technology required for medical practice (e.g., electronic health record, documentation required for billing and coding)</p> | <p>Discusses how individual practice affects the broader system (e.g., access to genetic testing and treatments, testing advocacy)</p> <p>Engages with patients in shared decision making, often informed by each patient's payment models</p> <p>Describes core administrative knowledge needed for transition to practice (e.g., contract negotiations, malpractice insurance, government regulation, compliance)</p> | <p>Manages various components of the complex health care system to provide efficient and effective patient care and transition of care</p> <p>Advocates for patient care needs (e.g., community resources, patient assistance resources) with consideration of the limitations of each patient's payment model, including genetic testing through research</p> <p>Analyzes individual practice patterns and professional requirements in preparation for practice</p> | <p>Advocates for or leads systems change that enhances high-value, efficient, and effective patient care and transition of care</p> <p>Participates in health policy advocacy activities</p> <p>Educates others to prepare them for transition to practice</p>                                                                                                                                                                                                                                                                                                                                                                                                                                                                                                                                                                                                                                                                                                                                                                                                                                                                                                                                                                                                                                                                                                                                                                                                                                                                                                                                                                                                                                                                                                                                                                                                                                                                                                                                                                                                                                                                                       |         |         |         |         |         |                                                                                                                                                                                                                                   |                                                                                                                                                                                                                                                                                                                                                                                    |                                                                                                                                                                                                                                                                                                                      |                                                                                                                                                                                                                                                                                                                                                                                                                                                                                                                |                                                                                                                                                                                                                                                                                                                                                                         |
| Level 1                                                                                                                                                                                                                                                                                                                                                                                                                    | Level 2                                                                                                                                                                                                                                                                                                                                                                                                                     | Level 3                                                                                                                                                                                                                                                                                                                                                                                                                                                                                                                                                                                                                                                                                                                                                                                                                                                                                                                                                                                                                                                                                                                                                                                                                                                                                                                                                                                                                                                         | Level 4                                                                                                                                                                                                                                                                                                                                                                                                                                                                                                        | Level 5                                                                                                                                                                                                                                                                                                                                                                                                                                                                                                                                                                                                                                                                                                                                                                                                                                                                                                                                                                                                                                                                                                                                                                                                                                                                                                                                                                                                                                                                                                                                                                                                                                                                                                                                                                                                                                                                                                                                                                                                                                                                                                                                                                                                                                                                                                                           |         |         |         |                                                                                                                                                                                                                                                         |                                                                                                                                                                                                                                                              |                                                                                                                                                                                                                                                                                                                                                                                                                            |                                                                                                                                                                                                                                                                                                                                                                                                                             |                                                                                                                                                                                                                                                                                                                                                                                                                         |                                                                                                                                                                                                                                                                                                                                                                                                                                                                       |                                                                                                                                                                                                                                                                                                                                                                                                                                                                                                                                                                                                                                                                                                                                                                                                                                                                                                                                                                                                                                                                                                                                                                                                                                                                                                                                                                                                                                                                                                                                                                                                                                                                                                                                                                                                                                                                                                                                                                                                                                                                                                                                                      |         |         |         |         |         |                                                                                                                                                                                                                                   |                                                                                                                                                                                                                                                                                                                                                                                    |                                                                                                                                                                                                                                                                                                                      |                                                                                                                                                                                                                                                                                                                                                                                                                                                                                                                |                                                                                                                                                                                                                                                                                                                                                                         |
| <p>Identifies key components of the complex health care system (e.g., hospital, skilled nursing facility, finance, personnel, technology)</p> <p>Describes basic health payment systems (e.g., government, private, public, uninsured care) and practice models</p> <p>Identifies basic knowledge for effective transition to practice (e.g., information technology, legal, billing and coding, financial, personnel)</p> | <p>Describes how components of a complex health care system are interrelated, and how this impacts patient care</p> <p>Delivers care with consideration of each patient's payment model (e.g., insurance type) and access to genetic testing or formula</p> <p>Demonstrates use of information technology required for medical practice (e.g., electronic health record, documentation required for billing and coding)</p> | <p>Discusses how individual practice affects the broader system (e.g., access to genetic testing and treatments, testing advocacy)</p> <p>Engages with patients in shared decision making, often informed by each patient's payment models</p> <p>Describes core administrative knowledge needed for transition to practice (e.g., contract negotiations, malpractice insurance, government regulation, compliance)</p>                                                                                                                                                                                                                                                                                                                                                                                                                                                                                                                                                                                                                                                                                                                                                                                                                                                                                                                                                                                                                                         | <p>Manages various components of the complex health care system to provide efficient and effective patient care and transition of care</p> <p>Advocates for patient care needs (e.g., community resources, patient assistance resources) with consideration of the limitations of each patient's payment model, including genetic testing through research</p> <p>Analyzes individual practice patterns and professional requirements in preparation for practice</p>                                          | <p>Advocates for or leads systems change that enhances high-value, efficient, and effective patient care and transition of care</p> <p>Participates in health policy advocacy activities</p> <p>Educates others to prepare them for transition to practice</p>                                                                                                                                                                                                                                                                                                                                                                                                                                                                                                                                                                                                                                                                                                                                                                                                                                                                                                                                                                                                                                                                                                                                                                                                                                                                                                                                                                                                                                                                                                                                                                                                                                                                                                                                                                                                                                                                                                                                                                                                                                                                    |         |         |         |                                                                                                                                                                                                                                                         |                                                                                                                                                                                                                                                              |                                                                                                                                                                                                                                                                                                                                                                                                                            |                                                                                                                                                                                                                                                                                                                                                                                                                             |                                                                                                                                                                                                                                                                                                                                                                                                                         |                                                                                                                                                                                                                                                                                                                                                                                                                                                                       |                                                                                                                                                                                                                                                                                                                                                                                                                                                                                                                                                                                                                                                                                                                                                                                                                                                                                                                                                                                                                                                                                                                                                                                                                                                                                                                                                                                                                                                                                                                                                                                                                                                                                                                                                                                                                                                                                                                                                                                                                                                                                                                                                      |         |         |         |         |         |                                                                                                                                                                                                                                   |                                                                                                                                                                                                                                                                                                                                                                                    |                                                                                                                                                                                                                                                                                                                      |                                                                                                                                                                                                                                                                                                                                                                                                                                                                                                                |                                                                                                                                                                                                                                                                                                                                                                         |
| <p><b>Neurological Surgery</b></p>                                                                                                                                                                                                                                                                                                                                                                                         | <p>PS</p>                                                                                                                                                                                                                                                                                                                                                                                                                   | <p><b>Systems-Based Practice 1: Patient Safety</b></p> <table border="1"> <thead> <tr> <th>Level 1</th> <th>Level 2</th> <th>Level 3</th> <th>Level 4</th> <th>Level 5</th> </tr> </thead> <tbody> <tr> <td>Describes principles of patient safety; performs safe and effective hand-offs and transitions of care in routine clinical situations</td> <td>Recognizes and reports patient safety events; performs safe and effective hand-offs and transitions of care in complex clinical situations</td> <td>Discloses patient safety events; supervises hand-offs and transitions of care</td> <td>Analyzes patient safety events and offers error prevention strategies; advocates for safe and effective transitions of care within and across health care systems</td> <td>Actively engages teams in process and system modification to prevent patient safety events; improves care transition practices within and across health care systems</td> </tr> </tbody> </table>                                                                                                                                                                                                                                                                                                                                                                                                                                                                               | Level 1                                                                                                                                                                                                                                                                                                                                                                                                                                                                                                        | Level 2                                                                                                                                                                                                                                                                                                                                                                                                                                                                                                                                                                                                                                                                                                                                                                                                                                                                                                                                                                                                                                                                                                                                                                                                                                                                                                                                                                                                                                                                                                                                                                                                                                                                                                                                                                                                                                                                                                                                                                                                                                                                                                                                                                                                                                                                                                                           | Level 3 | Level 4 | Level 5 | Describes principles of patient safety; performs safe and effective hand-offs and transitions of care in routine clinical situations                                                                                                                    | Recognizes and reports patient safety events; performs safe and effective hand-offs and transitions of care in complex clinical situations                                                                                                                   | Discloses patient safety events; supervises hand-offs and transitions of care                                                                                                                                                                                                                                                                                                                                              | Analyzes patient safety events and offers error prevention strategies; advocates for safe and effective transitions of care within and across health care systems                                                                                                                                                                                                                                                           | Actively engages teams in process and system modification to prevent patient safety events; improves care transition practices within and across health care systems                                                                                                                                                                                                                                                    |                                                                                                                                                                                                                                                                                                                                                                                                                                                                       |                                                                                                                                                                                                                                                                                                                                                                                                                                                                                                                                                                                                                                                                                                                                                                                                                                                                                                                                                                                                                                                                                                                                                                                                                                                                                                                                                                                                                                                                                                                                                                                                                                                                                                                                                                                                                                                                                                                                                                                                                                                                                                                                                      |         |         |         |         |         |                                                                                                                                                                                                                                   |                                                                                                                                                                                                                                                                                                                                                                                    |                                                                                                                                                                                                                                                                                                                      |                                                                                                                                                                                                                                                                                                                                                                                                                                                                                                                |                                                                                                                                                                                                                                                                                                                                                                         |
| Level 1                                                                                                                                                                                                                                                                                                                                                                                                                    | Level 2                                                                                                                                                                                                                                                                                                                                                                                                                     | Level 3                                                                                                                                                                                                                                                                                                                                                                                                                                                                                                                                                                                                                                                                                                                                                                                                                                                                                                                                                                                                                                                                                                                                                                                                                                                                                                                                                                                                                                                         | Level 4                                                                                                                                                                                                                                                                                                                                                                                                                                                                                                        | Level 5                                                                                                                                                                                                                                                                                                                                                                                                                                                                                                                                                                                                                                                                                                                                                                                                                                                                                                                                                                                                                                                                                                                                                                                                                                                                                                                                                                                                                                                                                                                                                                                                                                                                                                                                                                                                                                                                                                                                                                                                                                                                                                                                                                                                                                                                                                                           |         |         |         |                                                                                                                                                                                                                                                         |                                                                                                                                                                                                                                                              |                                                                                                                                                                                                                                                                                                                                                                                                                            |                                                                                                                                                                                                                                                                                                                                                                                                                             |                                                                                                                                                                                                                                                                                                                                                                                                                         |                                                                                                                                                                                                                                                                                                                                                                                                                                                                       |                                                                                                                                                                                                                                                                                                                                                                                                                                                                                                                                                                                                                                                                                                                                                                                                                                                                                                                                                                                                                                                                                                                                                                                                                                                                                                                                                                                                                                                                                                                                                                                                                                                                                                                                                                                                                                                                                                                                                                                                                                                                                                                                                      |         |         |         |         |         |                                                                                                                                                                                                                                   |                                                                                                                                                                                                                                                                                                                                                                                    |                                                                                                                                                                                                                                                                                                                      |                                                                                                                                                                                                                                                                                                                                                                                                                                                                                                                |                                                                                                                                                                                                                                                                                                                                                                         |
| Describes principles of patient safety; performs safe and effective hand-offs and transitions of care in routine clinical situations                                                                                                                                                                                                                                                                                       | Recognizes and reports patient safety events; performs safe and effective hand-offs and transitions of care in complex clinical situations                                                                                                                                                                                                                                                                                  | Discloses patient safety events; supervises hand-offs and transitions of care                                                                                                                                                                                                                                                                                                                                                                                                                                                                                                                                                                                                                                                                                                                                                                                                                                                                                                                                                                                                                                                                                                                                                                                                                                                                                                                                                                                   | Analyzes patient safety events and offers error prevention strategies; advocates for safe and effective transitions of care within and across health care systems                                                                                                                                                                                                                                                                                                                                              | Actively engages teams in process and system modification to prevent patient safety events; improves care transition practices within and across health care systems                                                                                                                                                                                                                                                                                                                                                                                                                                                                                                                                                                                                                                                                                                                                                                                                                                                                                                                                                                                                                                                                                                                                                                                                                                                                                                                                                                                                                                                                                                                                                                                                                                                                                                                                                                                                                                                                                                                                                                                                                                                                                                                                                              |         |         |         |                                                                                                                                                                                                                                                         |                                                                                                                                                                                                                                                              |                                                                                                                                                                                                                                                                                                                                                                                                                            |                                                                                                                                                                                                                                                                                                                                                                                                                             |                                                                                                                                                                                                                                                                                                                                                                                                                         |                                                                                                                                                                                                                                                                                                                                                                                                                                                                       |                                                                                                                                                                                                                                                                                                                                                                                                                                                                                                                                                                                                                                                                                                                                                                                                                                                                                                                                                                                                                                                                                                                                                                                                                                                                                                                                                                                                                                                                                                                                                                                                                                                                                                                                                                                                                                                                                                                                                                                                                                                                                                                                                      |         |         |         |         |         |                                                                                                                                                                                                                                   |                                                                                                                                                                                                                                                                                                                                                                                    |                                                                                                                                                                                                                                                                                                                      |                                                                                                                                                                                                                                                                                                                                                                                                                                                                                                                |                                                                                                                                                                                                                                                                                                                                                                         |
| <p><b>Neurological Surgery</b></p>                                                                                                                                                                                                                                                                                                                                                                                         | <p>QI</p>                                                                                                                                                                                                                                                                                                                                                                                                                   | <p><b>Systems-Based Practice 2: Quality Improvement</b></p> <table border="1"> <thead> <tr> <th>Level 1</th> <th>Level 2</th> <th>Level 3</th> <th>Level 4</th> <th>Level 5</th> </tr> </thead> <tbody> <tr> <td>Describes basic quality improvement methods and metrics</td> <td>Participates in local quality improvement initiatives (e.g., surgical site infection (SSI) reduction, care pathway implementation)</td> <td>Identifies quality improvement opportunities and assists in the development, implementation, and analysis of a quality improvement project</td> <td>Advances multiple quality improvement initiatives through participation in a quality improvement working group or committee</td> <td>Creates, implements, and assesses quality improvement initiatives</td> </tr> </tbody> </table>                                                                                                                                                                                                                                                                                                                                                                                                                                                                                                                                                                                                                                           | Level 1                                                                                                                                                                                                                                                                                                                                                                                                                                                                                                        | Level 2                                                                                                                                                                                                                                                                                                                                                                                                                                                                                                                                                                                                                                                                                                                                                                                                                                                                                                                                                                                                                                                                                                                                                                                                                                                                                                                                                                                                                                                                                                                                                                                                                                                                                                                                                                                                                                                                                                                                                                                                                                                                                                                                                                                                                                                                                                                           | Level 3 | Level 4 | Level 5 | Describes basic quality improvement methods and metrics                                                                                                                                                                                                 | Participates in local quality improvement initiatives (e.g., surgical site infection (SSI) reduction, care pathway implementation)                                                                                                                           | Identifies quality improvement opportunities and assists in the development, implementation, and analysis of a quality improvement project                                                                                                                                                                                                                                                                                 | Advances multiple quality improvement initiatives through participation in a quality improvement working group or committee                                                                                                                                                                                                                                                                                                 | Creates, implements, and assesses quality improvement initiatives                                                                                                                                                                                                                                                                                                                                                       |                                                                                                                                                                                                                                                                                                                                                                                                                                                                       |                                                                                                                                                                                                                                                                                                                                                                                                                                                                                                                                                                                                                                                                                                                                                                                                                                                                                                                                                                                                                                                                                                                                                                                                                                                                                                                                                                                                                                                                                                                                                                                                                                                                                                                                                                                                                                                                                                                                                                                                                                                                                                                                                      |         |         |         |         |         |                                                                                                                                                                                                                                   |                                                                                                                                                                                                                                                                                                                                                                                    |                                                                                                                                                                                                                                                                                                                      |                                                                                                                                                                                                                                                                                                                                                                                                                                                                                                                |                                                                                                                                                                                                                                                                                                                                                                         |
| Level 1                                                                                                                                                                                                                                                                                                                                                                                                                    | Level 2                                                                                                                                                                                                                                                                                                                                                                                                                     | Level 3                                                                                                                                                                                                                                                                                                                                                                                                                                                                                                                                                                                                                                                                                                                                                                                                                                                                                                                                                                                                                                                                                                                                                                                                                                                                                                                                                                                                                                                         | Level 4                                                                                                                                                                                                                                                                                                                                                                                                                                                                                                        | Level 5                                                                                                                                                                                                                                                                                                                                                                                                                                                                                                                                                                                                                                                                                                                                                                                                                                                                                                                                                                                                                                                                                                                                                                                                                                                                                                                                                                                                                                                                                                                                                                                                                                                                                                                                                                                                                                                                                                                                                                                                                                                                                                                                                                                                                                                                                                                           |         |         |         |                                                                                                                                                                                                                                                         |                                                                                                                                                                                                                                                              |                                                                                                                                                                                                                                                                                                                                                                                                                            |                                                                                                                                                                                                                                                                                                                                                                                                                             |                                                                                                                                                                                                                                                                                                                                                                                                                         |                                                                                                                                                                                                                                                                                                                                                                                                                                                                       |                                                                                                                                                                                                                                                                                                                                                                                                                                                                                                                                                                                                                                                                                                                                                                                                                                                                                                                                                                                                                                                                                                                                                                                                                                                                                                                                                                                                                                                                                                                                                                                                                                                                                                                                                                                                                                                                                                                                                                                                                                                                                                                                                      |         |         |         |         |         |                                                                                                                                                                                                                                   |                                                                                                                                                                                                                                                                                                                                                                                    |                                                                                                                                                                                                                                                                                                                      |                                                                                                                                                                                                                                                                                                                                                                                                                                                                                                                |                                                                                                                                                                                                                                                                                                                                                                         |
| Describes basic quality improvement methods and metrics                                                                                                                                                                                                                                                                                                                                                                    | Participates in local quality improvement initiatives (e.g., surgical site infection (SSI) reduction, care pathway implementation)                                                                                                                                                                                                                                                                                          | Identifies quality improvement opportunities and assists in the development, implementation, and analysis of a quality improvement project                                                                                                                                                                                                                                                                                                                                                                                                                                                                                                                                                                                                                                                                                                                                                                                                                                                                                                                                                                                                                                                                                                                                                                                                                                                                                                                      | Advances multiple quality improvement initiatives through participation in a quality improvement working group or committee                                                                                                                                                                                                                                                                                                                                                                                    | Creates, implements, and assesses quality improvement initiatives                                                                                                                                                                                                                                                                                                                                                                                                                                                                                                                                                                                                                                                                                                                                                                                                                                                                                                                                                                                                                                                                                                                                                                                                                                                                                                                                                                                                                                                                                                                                                                                                                                                                                                                                                                                                                                                                                                                                                                                                                                                                                                                                                                                                                                                                 |         |         |         |                                                                                                                                                                                                                                                         |                                                                                                                                                                                                                                                              |                                                                                                                                                                                                                                                                                                                                                                                                                            |                                                                                                                                                                                                                                                                                                                                                                                                                             |                                                                                                                                                                                                                                                                                                                                                                                                                         |                                                                                                                                                                                                                                                                                                                                                                                                                                                                       |                                                                                                                                                                                                                                                                                                                                                                                                                                                                                                                                                                                                                                                                                                                                                                                                                                                                                                                                                                                                                                                                                                                                                                                                                                                                                                                                                                                                                                                                                                                                                                                                                                                                                                                                                                                                                                                                                                                                                                                                                                                                                                                                                      |         |         |         |         |         |                                                                                                                                                                                                                                   |                                                                                                                                                                                                                                                                                                                                                                                    |                                                                                                                                                                                                                                                                                                                      |                                                                                                                                                                                                                                                                                                                                                                                                                                                                                                                |                                                                                                                                                                                                                                                                                                                                                                         |

|                           |                                    |                                                                                                                                                                              |                                                                                                                                                                                                                                                                                                                                                                                                                                                         |                                                                                                                                                                                                                                      |                                                                                                                                                                                                                                                                                                                                                   |                                                                                                                                                                                                                                                                                                                                              |
|---------------------------|------------------------------------|------------------------------------------------------------------------------------------------------------------------------------------------------------------------------|---------------------------------------------------------------------------------------------------------------------------------------------------------------------------------------------------------------------------------------------------------------------------------------------------------------------------------------------------------------------------------------------------------------------------------------------------------|--------------------------------------------------------------------------------------------------------------------------------------------------------------------------------------------------------------------------------------|---------------------------------------------------------------------------------------------------------------------------------------------------------------------------------------------------------------------------------------------------------------------------------------------------------------------------------------------------|----------------------------------------------------------------------------------------------------------------------------------------------------------------------------------------------------------------------------------------------------------------------------------------------------------------------------------------------|
| Neurological Surgery      | HC Systems                         | <b>Systems-Based Practice 3: Health Care Systems Awareness</b>                                                                                                               |                                                                                                                                                                                                                                                                                                                                                                                                                                                         |                                                                                                                                                                                                                                      |                                                                                                                                                                                                                                                                                                                                                   |                                                                                                                                                                                                                                                                                                                                              |
|                           |                                    | Level 1<br>Describes principles of US health payment systems                                                                                                                 | Level 2<br>Analyzes how personal practice affects the health care system (e.g. test ordering, length of stay, readmissions)                                                                                                                                                                                                                                                                                                                             | Level 3<br>Seeks information about neurosurgical career options and identifies professional mentor(s)                                                                                                                                | Level 4<br>Prepares for transition to practice (e.g. information technology, risk management, billing and coding, financial, personnel)                                                                                                                                                                                                           | Level 5<br>Collaborates with nursing and administrative teams to promote high value, quality care within a health care system                                                                                                                                                                                                                |
| Neurology                 | HC Costs and Risk                  | <b>Systems thinking, including cost and risk effective practice – Systems-based Practice</b>                                                                                 |                                                                                                                                                                                                                                                                                                                                                                                                                                                         |                                                                                                                                                                                                                                      |                                                                                                                                                                                                                                                                                                                                                   |                                                                                                                                                                                                                                                                                                                                              |
|                           |                                    | Level 1<br>• Describes basic cost and risk implications of care                                                                                                              | Level 2<br>• Describes cost and risk benefit ratios in patient care                                                                                                                                                                                                                                                                                                                                                                                     | Level 3<br>• Makes clinical decisions that balance cost and risk benefit ratios                                                                                                                                                      | Level 4<br>• Incorporates available quality measures in patient care                                                                                                                                                                                                                                                                              | Level 5<br>• Engages in scholarly activity regarding cost- and risk-effective practice                                                                                                                                                                                                                                                       |
| Neurology                 | Teams                              | <b>Work in inter-professional teams to enhance patient safety – Systems-based Practice</b>                                                                                   |                                                                                                                                                                                                                                                                                                                                                                                                                                                         |                                                                                                                                                                                                                                      |                                                                                                                                                                                                                                                                                                                                                   |                                                                                                                                                                                                                                                                                                                                              |
|                           |                                    | Level 1<br>• Describes team members' roles in maintaining patient safety                                                                                                     | Level 2<br>• Identifies and reports errors and near-misses                                                                                                                                                                                                                                                                                                                                                                                              | Level 3<br>• Describes potential sources of system failure in clinical care such as minor, major, and sentinel events                                                                                                                | Level 4<br>• Participates in a team-based approach to medical error analysis                                                                                                                                                                                                                                                                      | Level 5<br>• Engages in scholarly activity regarding error analysis and patient safety                                                                                                                                                                                                                                                       |
| Nuclear Medicine          | Informatics                        | <b>Computer Systems – Systems-based Practice</b>                                                                                                                             |                                                                                                                                                                                                                                                                                                                                                                                                                                                         |                                                                                                                                                                                                                                      |                                                                                                                                                                                                                                                                                                                                                   |                                                                                                                                                                                                                                                                                                                                              |
|                           |                                    | Level 1<br>• Accesses clinical computer systems; is familiar with word processing and spreadsheet programs                                                                   | Level 2<br>• Retrieves basic patient information from the electronic medical record; is able to use the basic functions of picture archiving and communication system (PACS) and voice recognition systems<br>• Understands Health Insurance Portability and Accountability Act (HIPAA) policies and appropriate use concepts                                                                                                                           | Level 3<br>• Retrieves complex patient information from the electronic medical record; is able to use the advanced functions of PACs and voice recognition systems                                                                   | Level 4<br>• Is familiar with the basic functions of the billing systems                                                                                                                                                                                                                                                                          | Level 5<br>• Recommends changes to computer systems/records to provide additional useful functionality                                                                                                                                                                                                                                       |
| Nuclear Medicine          | Costs and Revenues                 | <b>Economics – Systems-based Practice</b>                                                                                                                                    |                                                                                                                                                                                                                                                                                                                                                                                                                                                         |                                                                                                                                                                                                                                      |                                                                                                                                                                                                                                                                                                                                                   |                                                                                                                                                                                                                                                                                                                                              |
|                           |                                    | Level 1<br>• Has a basic understanding of the advantages and disadvantages of different payment systems                                                                      | Level 2<br>• Has a basic understanding of the economics of inpatient vs. outpatient care, and the impact of quality improvement incentives<br>• Develops understanding of relative cost per procedure                                                                                                                                                                                                                                                   | Level 3<br>• Has a basic practical understanding of the pre-certification process, radiology benefits managers, structured computer-based order entry systems, and Medicare/Medicaid procedure and report requirements               | Level 4<br>• Has an advanced practical understanding of the pre-certification process, radiology benefits managers, structured computer-based order entry systems, and Medicare/Medicaid procedure and report requirements                                                                                                                        | Level 5<br>• Has a basic understanding of current state and national health care policies and their implications                                                                                                                                                                                                                             |
| Obstetrics and Gynecology | PS                                 | <b>Patient Safety and Systems Approach to Medical Errors: Participate in identifying system errors and implementing potential systems solutions – Systems-based Practice</b> |                                                                                                                                                                                                                                                                                                                                                                                                                                                         |                                                                                                                                                                                                                                      |                                                                                                                                                                                                                                                                                                                                                   |                                                                                                                                                                                                                                                                                                                                              |
|                           |                                    | Level 1<br>Recognizes limitations and failures of a team approach (e.g. hand-offs, miscommunication) in health care as the leading cause of preventable patient harm         | Level 2<br>Demonstrates knowledge of institutional surveillance systems to monitor for patient safety (e.g., surgical site infection, medical error reporting)<br><br>Participates in "time-out"<br><br>Appropriately utilizes check lists to promote patient safety (e.g., medication reconciliation)<br><br>Demonstrates knowledge of the epidemiology of medical errors and the differences between near misses, medical errors, and sentinel events | Level 3<br>Participates in patient safety reporting and analyzing systems<br><br>Participates in team drills<br><br>Demonstrates knowledge of national patient safety standards, as well as their use/application in the institution | Level 4<br>Reports errors and near-misses to the institutional surveillance system and superiors<br><br>Recognizes when root cause analysis is necessary, and is capable of participating in root cause analysis<br><br>Actively participates in quality improvement (QI)/patient safety projects                                                 | Level 5<br>Contributes to peer-reviewed medical literature<br><br>Organizes and leads institutional QI/patient safety projects                                                                                                                                                                                                               |
| Obstetrics and Gynecology | HC Costs<br><br>Advocacy<br><br>CC | <b>Cost-effective Care and Patient Advocacy – Systems-based Practice</b>                                                                                                     |                                                                                                                                                                                                                                                                                                                                                                                                                                                         |                                                                                                                                                                                                                                      |                                                                                                                                                                                                                                                                                                                                                   |                                                                                                                                                                                                                                                                                                                                              |
|                           |                                    | Level 1<br>Understands the importance of providing cost-effective care                                                                                                       | Level 2<br>Is aware of common socioeconomic barriers that impact patient care<br><br>Demonstrates an awareness of the need for coordination of patient care and patient advocacy                                                                                                                                                                                                                                                                        | Level 3<br>Demonstrates the incorporation of cost awareness into clinical judgment and decision making<br><br>Coordinates and advocates for needed resources to facilitate patient care (e.g., effective discharge planning)         | Level 4<br>Practices cost-effective care (e.g., formulary drugs, generic drugs, tailoring of diagnostic tests)<br><br>Analyzes patient care options from a quality of life (QOL)/cost-of-care perspective, and includes in patient counseling<br><br>Effectively communicates within his or her own hospital/clinic to advocate for patient needs | Level 5<br>Participates in advocacy or health care legislation locally, regionally, or nationally<br><br>Effectively communicates within health care systems to advocate for the needs of patient populations<br><br>Demonstrates an understanding of the political economics of health care legislation locally, regionally, and nationally |

| <p><b>Ophthalmology</b></p>                                                                                                                                                                                            | <p>CC</p>                                                                                                                                                                                                                         | <p><b>SBP-1. Work effectively and coordinate patient care in various health care delivery systems</b></p> <table border="1"> <thead> <tr> <th>Has not Achieved Level 1</th> <th>Level 1</th> <th>Level 2</th> <th>Level 3</th> <th>Level 4</th> <th>Level 5</th> </tr> </thead> <tbody> <tr> <td></td> <td>Describes basic levels of systems of care (self-management to societal)</td> <td>Describes systems of care within residency program</td> <td>Identifies impediments to safe and efficient transitions of care within and between systems</td> <td>Proposes solutions to impediments to safe and efficient transitions of care within and between systems</td> <td>Leads systems change at micro and macro levels</td> </tr> <tr> <td></td> <td></td> <td>Demonstrates awareness of need for safe transitions of care; lists potential impediments to safe and efficient transitions of care within and between systems</td> <td>Manages routine transitions safely</td> <td>Manages complex transitions of care within and between systems</td> <td>Demonstrates leadership potential for systems changes</td> </tr> </tbody> </table>                                                                                                                                                                                                                                                                                                                                                                                              | Has not Achieved Level 1                                                                                                                                                                            | Level 1                                                                                                                                                                          | Level 2                                                                                      | Level 3 | Level 4 | Level 5                                                                                                                                                                                                                |                                                                                                                                                                                                                                   | Describes basic levels of systems of care (self-management to societal)                                                                                                                                                                       | Describes systems of care within residency program                                                                                                                                                  | Identifies impediments to safe and efficient transitions of care within and between systems                                                                                      | Proposes solutions to impediments to safe and efficient transitions of care within and between systems                                        | Leads systems change at micro and macro levels                                               |  |                                                                                                     | Demonstrates awareness of need for safe transitions of care; lists potential impediments to safe and efficient transitions of care within and between systems | Manages routine transitions safely                                                                 | Manages complex transitions of care within and between systems                      | Demonstrates leadership potential for systems changes | <p>PS<br/>QI</p> | <p><b>Systems-Based Practice 1: Patient Safety and Quality Improvement</b></p> <table border="1"> <thead> <tr> <th>Level 1</th> <th>Level 2</th> <th>Level 3</th> <th>Level 4</th> <th>Level 5</th> </tr> </thead> <tbody> <tr> <td>Demonstrates knowledge of common patient safety events</td> <td>Identifies system factors that lead to patient safety events</td> <td>Participates in analysis of patient safety events (simulated or actual)</td> <td>Conducts analysis of patient safety events and offers error prevention strategies (simulated or actual)</td> <td>Actively engages teams and processes to modify systems to prevent patient safety events</td> </tr> <tr> <td>Demonstrates knowledge of how to report patient safety events</td> <td>Reports patient safety events through institutional reporting systems (simulated or actual)</td> <td>Participates in disclosure of patient safety events to patients and families (simulated or actual)</td> <td>Discloses patient safety events to patients and families (simulated or actual)</td> <td>Role models or mentors others in the disclosure of patient safety events</td> </tr> <tr> <td>Demonstrates knowledge of basic quality improvement methodologies and metrics</td> <td>Describes local quality improvement initiatives (e.g., eye protection for high risk activities, diabetic eye screening)</td> <td>Participates in local quality improvement initiatives</td> <td>Demonstrates the skills required to identify, develop, implement, and analyze a quality improvement project</td> <td>Creates, implements, and assesses quality improvement initiatives at the institutional or community level</td> </tr> </tbody> </table> | Level 1                                                                              | Level 2 | Level 3                                                                                               | Level 4 | Level 5           | Demonstrates knowledge of common patient safety events                                                                                                                                                                                                                                                                                                                                                                                                                                                                                                                                                                                                                                                                                                                                                                                                                                                                                                                                                                                                                                                                                                                                                                                                                                                                                                | Identifies system factors that lead to patient safety events           | Participates in analysis of patient safety events (simulated or actual) | Conducts analysis of patient safety events and offers error prevention strategies (simulated or actual) | Actively engages teams and processes to modify systems to prevent patient safety events | Demonstrates knowledge of how to report patient safety events | Reports patient safety events through institutional reporting systems (simulated or actual)                                                                                                                                                                                                                                                                                                                                                                                                                                                                                                                                                                                                                                                                                                                                                                                                                                                                                                                                                                                                                                                                                                                                                                                                                                                                                                                                                                                                                                                                                                                                                                                                                                                                                                                                                                                                                                                 | Participates in disclosure of patient safety events to patients and families (simulated or actual)              | Discloses patient safety events to patients and families (simulated or actual) | Role models or mentors others in the disclosure of patient safety events                                                                    | Demonstrates knowledge of basic quality improvement methodologies and metrics | Describes local quality improvement initiatives (e.g., eye protection for high risk activities, diabetic eye screening) | Participates in local quality improvement initiatives                   | Demonstrates the skills required to identify, develop, implement, and analyze a quality improvement project                | Creates, implements, and assesses quality improvement initiatives at the institutional or community level                                                       |                                                                                                                                   |                                                                                                      |                                                                                  |                                                                                          |                                                                                          |                                                                                                               |                                                                                                                     |                                                                                                          |                                                                                       |                                                                                   |                                                                                          |                                                                                                 |
|------------------------------------------------------------------------------------------------------------------------------------------------------------------------------------------------------------------------|-----------------------------------------------------------------------------------------------------------------------------------------------------------------------------------------------------------------------------------|------------------------------------------------------------------------------------------------------------------------------------------------------------------------------------------------------------------------------------------------------------------------------------------------------------------------------------------------------------------------------------------------------------------------------------------------------------------------------------------------------------------------------------------------------------------------------------------------------------------------------------------------------------------------------------------------------------------------------------------------------------------------------------------------------------------------------------------------------------------------------------------------------------------------------------------------------------------------------------------------------------------------------------------------------------------------------------------------------------------------------------------------------------------------------------------------------------------------------------------------------------------------------------------------------------------------------------------------------------------------------------------------------------------------------------------------------------------------------------------------------------------------------------------------|-----------------------------------------------------------------------------------------------------------------------------------------------------------------------------------------------------|----------------------------------------------------------------------------------------------------------------------------------------------------------------------------------|----------------------------------------------------------------------------------------------|---------|---------|------------------------------------------------------------------------------------------------------------------------------------------------------------------------------------------------------------------------|-----------------------------------------------------------------------------------------------------------------------------------------------------------------------------------------------------------------------------------|-----------------------------------------------------------------------------------------------------------------------------------------------------------------------------------------------------------------------------------------------|-----------------------------------------------------------------------------------------------------------------------------------------------------------------------------------------------------|----------------------------------------------------------------------------------------------------------------------------------------------------------------------------------|-----------------------------------------------------------------------------------------------------------------------------------------------|----------------------------------------------------------------------------------------------|--|-----------------------------------------------------------------------------------------------------|---------------------------------------------------------------------------------------------------------------------------------------------------------------|----------------------------------------------------------------------------------------------------|-------------------------------------------------------------------------------------|-------------------------------------------------------|------------------|-------------------------------------------------------------------------------------------------------------------------------------------------------------------------------------------------------------------------------------------------------------------------------------------------------------------------------------------------------------------------------------------------------------------------------------------------------------------------------------------------------------------------------------------------------------------------------------------------------------------------------------------------------------------------------------------------------------------------------------------------------------------------------------------------------------------------------------------------------------------------------------------------------------------------------------------------------------------------------------------------------------------------------------------------------------------------------------------------------------------------------------------------------------------------------------------------------------------------------------------------------------------------------------------------------------------------------------------------------------------------------------------------------------------------------------------------------------------------------------------------------------------------------------------------------------------------------------------------------------------------------------------------------------------------------------------------------------------------|--------------------------------------------------------------------------------------|---------|-------------------------------------------------------------------------------------------------------|---------|-------------------|-------------------------------------------------------------------------------------------------------------------------------------------------------------------------------------------------------------------------------------------------------------------------------------------------------------------------------------------------------------------------------------------------------------------------------------------------------------------------------------------------------------------------------------------------------------------------------------------------------------------------------------------------------------------------------------------------------------------------------------------------------------------------------------------------------------------------------------------------------------------------------------------------------------------------------------------------------------------------------------------------------------------------------------------------------------------------------------------------------------------------------------------------------------------------------------------------------------------------------------------------------------------------------------------------------------------------------------------------------|------------------------------------------------------------------------|-------------------------------------------------------------------------|---------------------------------------------------------------------------------------------------------|-----------------------------------------------------------------------------------------|---------------------------------------------------------------|---------------------------------------------------------------------------------------------------------------------------------------------------------------------------------------------------------------------------------------------------------------------------------------------------------------------------------------------------------------------------------------------------------------------------------------------------------------------------------------------------------------------------------------------------------------------------------------------------------------------------------------------------------------------------------------------------------------------------------------------------------------------------------------------------------------------------------------------------------------------------------------------------------------------------------------------------------------------------------------------------------------------------------------------------------------------------------------------------------------------------------------------------------------------------------------------------------------------------------------------------------------------------------------------------------------------------------------------------------------------------------------------------------------------------------------------------------------------------------------------------------------------------------------------------------------------------------------------------------------------------------------------------------------------------------------------------------------------------------------------------------------------------------------------------------------------------------------------------------------------------------------------------------------------------------------------|-----------------------------------------------------------------------------------------------------------------|--------------------------------------------------------------------------------|---------------------------------------------------------------------------------------------------------------------------------------------|-------------------------------------------------------------------------------|-------------------------------------------------------------------------------------------------------------------------|-------------------------------------------------------------------------|----------------------------------------------------------------------------------------------------------------------------|-----------------------------------------------------------------------------------------------------------------------------------------------------------------|-----------------------------------------------------------------------------------------------------------------------------------|------------------------------------------------------------------------------------------------------|----------------------------------------------------------------------------------|------------------------------------------------------------------------------------------|------------------------------------------------------------------------------------------|---------------------------------------------------------------------------------------------------------------|---------------------------------------------------------------------------------------------------------------------|----------------------------------------------------------------------------------------------------------|---------------------------------------------------------------------------------------|-----------------------------------------------------------------------------------|------------------------------------------------------------------------------------------|-------------------------------------------------------------------------------------------------|
| Has not Achieved Level 1                                                                                                                                                                                               | Level 1                                                                                                                                                                                                                           | Level 2                                                                                                                                                                                                                                                                                                                                                                                                                                                                                                                                                                                                                                                                                                                                                                                                                                                                                                                                                                                                                                                                                                                                                                                                                                                                                                                                                                                                                                                                                                                                        | Level 3                                                                                                                                                                                             | Level 4                                                                                                                                                                          | Level 5                                                                                      |         |         |                                                                                                                                                                                                                        |                                                                                                                                                                                                                                   |                                                                                                                                                                                                                                               |                                                                                                                                                                                                     |                                                                                                                                                                                  |                                                                                                                                               |                                                                                              |  |                                                                                                     |                                                                                                                                                               |                                                                                                    |                                                                                     |                                                       |                  |                                                                                                                                                                                                                                                                                                                                                                                                                                                                                                                                                                                                                                                                                                                                                                                                                                                                                                                                                                                                                                                                                                                                                                                                                                                                                                                                                                                                                                                                                                                                                                                                                                                                                                                         |                                                                                      |         |                                                                                                       |         |                   |                                                                                                                                                                                                                                                                                                                                                                                                                                                                                                                                                                                                                                                                                                                                                                                                                                                                                                                                                                                                                                                                                                                                                                                                                                                                                                                                                       |                                                                        |                                                                         |                                                                                                         |                                                                                         |                                                               |                                                                                                                                                                                                                                                                                                                                                                                                                                                                                                                                                                                                                                                                                                                                                                                                                                                                                                                                                                                                                                                                                                                                                                                                                                                                                                                                                                                                                                                                                                                                                                                                                                                                                                                                                                                                                                                                                                                                             |                                                                                                                 |                                                                                |                                                                                                                                             |                                                                               |                                                                                                                         |                                                                         |                                                                                                                            |                                                                                                                                                                 |                                                                                                                                   |                                                                                                      |                                                                                  |                                                                                          |                                                                                          |                                                                                                               |                                                                                                                     |                                                                                                          |                                                                                       |                                                                                   |                                                                                          |                                                                                                 |
|                                                                                                                                                                                                                        | Describes basic levels of systems of care (self-management to societal)                                                                                                                                                           | Describes systems of care within residency program                                                                                                                                                                                                                                                                                                                                                                                                                                                                                                                                                                                                                                                                                                                                                                                                                                                                                                                                                                                                                                                                                                                                                                                                                                                                                                                                                                                                                                                                                             | Identifies impediments to safe and efficient transitions of care within and between systems                                                                                                         | Proposes solutions to impediments to safe and efficient transitions of care within and between systems                                                                           | Leads systems change at micro and macro levels                                               |         |         |                                                                                                                                                                                                                        |                                                                                                                                                                                                                                   |                                                                                                                                                                                                                                               |                                                                                                                                                                                                     |                                                                                                                                                                                  |                                                                                                                                               |                                                                                              |  |                                                                                                     |                                                                                                                                                               |                                                                                                    |                                                                                     |                                                       |                  |                                                                                                                                                                                                                                                                                                                                                                                                                                                                                                                                                                                                                                                                                                                                                                                                                                                                                                                                                                                                                                                                                                                                                                                                                                                                                                                                                                                                                                                                                                                                                                                                                                                                                                                         |                                                                                      |         |                                                                                                       |         |                   |                                                                                                                                                                                                                                                                                                                                                                                                                                                                                                                                                                                                                                                                                                                                                                                                                                                                                                                                                                                                                                                                                                                                                                                                                                                                                                                                                       |                                                                        |                                                                         |                                                                                                         |                                                                                         |                                                               |                                                                                                                                                                                                                                                                                                                                                                                                                                                                                                                                                                                                                                                                                                                                                                                                                                                                                                                                                                                                                                                                                                                                                                                                                                                                                                                                                                                                                                                                                                                                                                                                                                                                                                                                                                                                                                                                                                                                             |                                                                                                                 |                                                                                |                                                                                                                                             |                                                                               |                                                                                                                         |                                                                         |                                                                                                                            |                                                                                                                                                                 |                                                                                                                                   |                                                                                                      |                                                                                  |                                                                                          |                                                                                          |                                                                                                               |                                                                                                                     |                                                                                                          |                                                                                       |                                                                                   |                                                                                          |                                                                                                 |
|                                                                                                                                                                                                                        |                                                                                                                                                                                                                                   | Demonstrates awareness of need for safe transitions of care; lists potential impediments to safe and efficient transitions of care within and between systems                                                                                                                                                                                                                                                                                                                                                                                                                                                                                                                                                                                                                                                                                                                                                                                                                                                                                                                                                                                                                                                                                                                                                                                                                                                                                                                                                                                  | Manages routine transitions safely                                                                                                                                                                  | Manages complex transitions of care within and between systems                                                                                                                   | Demonstrates leadership potential for systems changes                                        |         |         |                                                                                                                                                                                                                        |                                                                                                                                                                                                                                   |                                                                                                                                                                                                                                               |                                                                                                                                                                                                     |                                                                                                                                                                                  |                                                                                                                                               |                                                                                              |  |                                                                                                     |                                                                                                                                                               |                                                                                                    |                                                                                     |                                                       |                  |                                                                                                                                                                                                                                                                                                                                                                                                                                                                                                                                                                                                                                                                                                                                                                                                                                                                                                                                                                                                                                                                                                                                                                                                                                                                                                                                                                                                                                                                                                                                                                                                                                                                                                                         |                                                                                      |         |                                                                                                       |         |                   |                                                                                                                                                                                                                                                                                                                                                                                                                                                                                                                                                                                                                                                                                                                                                                                                                                                                                                                                                                                                                                                                                                                                                                                                                                                                                                                                                       |                                                                        |                                                                         |                                                                                                         |                                                                                         |                                                               |                                                                                                                                                                                                                                                                                                                                                                                                                                                                                                                                                                                                                                                                                                                                                                                                                                                                                                                                                                                                                                                                                                                                                                                                                                                                                                                                                                                                                                                                                                                                                                                                                                                                                                                                                                                                                                                                                                                                             |                                                                                                                 |                                                                                |                                                                                                                                             |                                                                               |                                                                                                                         |                                                                         |                                                                                                                            |                                                                                                                                                                 |                                                                                                                                   |                                                                                                      |                                                                                  |                                                                                          |                                                                                          |                                                                                                               |                                                                                                                     |                                                                                                          |                                                                                       |                                                                                   |                                                                                          |                                                                                                 |
| Level 1                                                                                                                                                                                                                | Level 2                                                                                                                                                                                                                           | Level 3                                                                                                                                                                                                                                                                                                                                                                                                                                                                                                                                                                                                                                                                                                                                                                                                                                                                                                                                                                                                                                                                                                                                                                                                                                                                                                                                                                                                                                                                                                                                        | Level 4                                                                                                                                                                                             | Level 5                                                                                                                                                                          |                                                                                              |         |         |                                                                                                                                                                                                                        |                                                                                                                                                                                                                                   |                                                                                                                                                                                                                                               |                                                                                                                                                                                                     |                                                                                                                                                                                  |                                                                                                                                               |                                                                                              |  |                                                                                                     |                                                                                                                                                               |                                                                                                    |                                                                                     |                                                       |                  |                                                                                                                                                                                                                                                                                                                                                                                                                                                                                                                                                                                                                                                                                                                                                                                                                                                                                                                                                                                                                                                                                                                                                                                                                                                                                                                                                                                                                                                                                                                                                                                                                                                                                                                         |                                                                                      |         |                                                                                                       |         |                   |                                                                                                                                                                                                                                                                                                                                                                                                                                                                                                                                                                                                                                                                                                                                                                                                                                                                                                                                                                                                                                                                                                                                                                                                                                                                                                                                                       |                                                                        |                                                                         |                                                                                                         |                                                                                         |                                                               |                                                                                                                                                                                                                                                                                                                                                                                                                                                                                                                                                                                                                                                                                                                                                                                                                                                                                                                                                                                                                                                                                                                                                                                                                                                                                                                                                                                                                                                                                                                                                                                                                                                                                                                                                                                                                                                                                                                                             |                                                                                                                 |                                                                                |                                                                                                                                             |                                                                               |                                                                                                                         |                                                                         |                                                                                                                            |                                                                                                                                                                 |                                                                                                                                   |                                                                                                      |                                                                                  |                                                                                          |                                                                                          |                                                                                                               |                                                                                                                     |                                                                                                          |                                                                                       |                                                                                   |                                                                                          |                                                                                                 |
| Demonstrates knowledge of common patient safety events                                                                                                                                                                 | Identifies system factors that lead to patient safety events                                                                                                                                                                      | Participates in analysis of patient safety events (simulated or actual)                                                                                                                                                                                                                                                                                                                                                                                                                                                                                                                                                                                                                                                                                                                                                                                                                                                                                                                                                                                                                                                                                                                                                                                                                                                                                                                                                                                                                                                                        | Conducts analysis of patient safety events and offers error prevention strategies (simulated or actual)                                                                                             | Actively engages teams and processes to modify systems to prevent patient safety events                                                                                          |                                                                                              |         |         |                                                                                                                                                                                                                        |                                                                                                                                                                                                                                   |                                                                                                                                                                                                                                               |                                                                                                                                                                                                     |                                                                                                                                                                                  |                                                                                                                                               |                                                                                              |  |                                                                                                     |                                                                                                                                                               |                                                                                                    |                                                                                     |                                                       |                  |                                                                                                                                                                                                                                                                                                                                                                                                                                                                                                                                                                                                                                                                                                                                                                                                                                                                                                                                                                                                                                                                                                                                                                                                                                                                                                                                                                                                                                                                                                                                                                                                                                                                                                                         |                                                                                      |         |                                                                                                       |         |                   |                                                                                                                                                                                                                                                                                                                                                                                                                                                                                                                                                                                                                                                                                                                                                                                                                                                                                                                                                                                                                                                                                                                                                                                                                                                                                                                                                       |                                                                        |                                                                         |                                                                                                         |                                                                                         |                                                               |                                                                                                                                                                                                                                                                                                                                                                                                                                                                                                                                                                                                                                                                                                                                                                                                                                                                                                                                                                                                                                                                                                                                                                                                                                                                                                                                                                                                                                                                                                                                                                                                                                                                                                                                                                                                                                                                                                                                             |                                                                                                                 |                                                                                |                                                                                                                                             |                                                                               |                                                                                                                         |                                                                         |                                                                                                                            |                                                                                                                                                                 |                                                                                                                                   |                                                                                                      |                                                                                  |                                                                                          |                                                                                          |                                                                                                               |                                                                                                                     |                                                                                                          |                                                                                       |                                                                                   |                                                                                          |                                                                                                 |
| Demonstrates knowledge of how to report patient safety events                                                                                                                                                          | Reports patient safety events through institutional reporting systems (simulated or actual)                                                                                                                                       | Participates in disclosure of patient safety events to patients and families (simulated or actual)                                                                                                                                                                                                                                                                                                                                                                                                                                                                                                                                                                                                                                                                                                                                                                                                                                                                                                                                                                                                                                                                                                                                                                                                                                                                                                                                                                                                                                             | Discloses patient safety events to patients and families (simulated or actual)                                                                                                                      | Role models or mentors others in the disclosure of patient safety events                                                                                                         |                                                                                              |         |         |                                                                                                                                                                                                                        |                                                                                                                                                                                                                                   |                                                                                                                                                                                                                                               |                                                                                                                                                                                                     |                                                                                                                                                                                  |                                                                                                                                               |                                                                                              |  |                                                                                                     |                                                                                                                                                               |                                                                                                    |                                                                                     |                                                       |                  |                                                                                                                                                                                                                                                                                                                                                                                                                                                                                                                                                                                                                                                                                                                                                                                                                                                                                                                                                                                                                                                                                                                                                                                                                                                                                                                                                                                                                                                                                                                                                                                                                                                                                                                         |                                                                                      |         |                                                                                                       |         |                   |                                                                                                                                                                                                                                                                                                                                                                                                                                                                                                                                                                                                                                                                                                                                                                                                                                                                                                                                                                                                                                                                                                                                                                                                                                                                                                                                                       |                                                                        |                                                                         |                                                                                                         |                                                                                         |                                                               |                                                                                                                                                                                                                                                                                                                                                                                                                                                                                                                                                                                                                                                                                                                                                                                                                                                                                                                                                                                                                                                                                                                                                                                                                                                                                                                                                                                                                                                                                                                                                                                                                                                                                                                                                                                                                                                                                                                                             |                                                                                                                 |                                                                                |                                                                                                                                             |                                                                               |                                                                                                                         |                                                                         |                                                                                                                            |                                                                                                                                                                 |                                                                                                                                   |                                                                                                      |                                                                                  |                                                                                          |                                                                                          |                                                                                                               |                                                                                                                     |                                                                                                          |                                                                                       |                                                                                   |                                                                                          |                                                                                                 |
| Demonstrates knowledge of basic quality improvement methodologies and metrics                                                                                                                                          | Describes local quality improvement initiatives (e.g., eye protection for high risk activities, diabetic eye screening)                                                                                                           | Participates in local quality improvement initiatives                                                                                                                                                                                                                                                                                                                                                                                                                                                                                                                                                                                                                                                                                                                                                                                                                                                                                                                                                                                                                                                                                                                                                                                                                                                                                                                                                                                                                                                                                          | Demonstrates the skills required to identify, develop, implement, and analyze a quality improvement project                                                                                         | Creates, implements, and assesses quality improvement initiatives at the institutional or community level                                                                        |                                                                                              |         |         |                                                                                                                                                                                                                        |                                                                                                                                                                                                                                   |                                                                                                                                                                                                                                               |                                                                                                                                                                                                     |                                                                                                                                                                                  |                                                                                                                                               |                                                                                              |  |                                                                                                     |                                                                                                                                                               |                                                                                                    |                                                                                     |                                                       |                  |                                                                                                                                                                                                                                                                                                                                                                                                                                                                                                                                                                                                                                                                                                                                                                                                                                                                                                                                                                                                                                                                                                                                                                                                                                                                                                                                                                                                                                                                                                                                                                                                                                                                                                                         |                                                                                      |         |                                                                                                       |         |                   |                                                                                                                                                                                                                                                                                                                                                                                                                                                                                                                                                                                                                                                                                                                                                                                                                                                                                                                                                                                                                                                                                                                                                                                                                                                                                                                                                       |                                                                        |                                                                         |                                                                                                         |                                                                                         |                                                               |                                                                                                                                                                                                                                                                                                                                                                                                                                                                                                                                                                                                                                                                                                                                                                                                                                                                                                                                                                                                                                                                                                                                                                                                                                                                                                                                                                                                                                                                                                                                                                                                                                                                                                                                                                                                                                                                                                                                             |                                                                                                                 |                                                                                |                                                                                                                                             |                                                                               |                                                                                                                         |                                                                         |                                                                                                                            |                                                                                                                                                                 |                                                                                                                                   |                                                                                                      |                                                                                  |                                                                                          |                                                                                          |                                                                                                               |                                                                                                                     |                                                                                                          |                                                                                       |                                                                                   |                                                                                          |                                                                                                 |
| <p><b>Ophthalmology</b></p>                                                                                                                                                                                            | <p>HC Costs<br/>Informatics</p>                                                                                                                                                                                                   | <p><b>SBP-2. Incorporate cost-effectiveness, risk/benefit analysis, and IT to promote safe and effective patient care</b></p> <table border="1"> <thead> <tr> <th>Has not Achieved Level 1</th> <th>Level 1</th> <th>Level 2</th> <th>Level 3</th> <th>Level 4</th> <th>Level 5</th> </tr> </thead> <tbody> <tr> <td></td> <td>Describes scenarios in which physician may affect cost-effectiveness in patient care</td> <td>Describes scenarios in which ophthalmologist may affect cost-effectiveness in patient care</td> <td>Often practices cost-effective care</td> <td>Consistently practices cost-effective care</td> <td>Advocates for cost-effective care and use of risk-benefit analyses within health care system</td> </tr> <tr> <td></td> <td>Explains the role of the Electronic Health Record (EHR) in prevention of medical errors</td> <td>Describes specific cost options for most frequently ordered tests and medications</td> <td></td> <td>Applies risk-benefit analyses in ophthalmic care</td> <td>Recommends systems re-design for faulty processes</td> </tr> <tr> <td></td> <td></td> <td>Utilizes EHR, where available, to order tests and reconcile medications for patients</td> <td></td> <td>Contributes to reduction of risks of automation and computerized systems by reporting system problems</td> <td></td> </tr> <tr> <td></td> <td></td> <td>Uses information systems for patient care, including literature review</td> <td></td> <td></td> <td></td> </tr> </tbody> </table>                       | Has not Achieved Level 1                                                                                                                                                                            | Level 1                                                                                                                                                                          | Level 2                                                                                      | Level 3 | Level 4 | Level 5                                                                                                                                                                                                                |                                                                                                                                                                                                                                   | Describes scenarios in which physician may affect cost-effectiveness in patient care                                                                                                                                                          | Describes scenarios in which ophthalmologist may affect cost-effectiveness in patient care                                                                                                          | Often practices cost-effective care                                                                                                                                              | Consistently practices cost-effective care                                                                                                    | Advocates for cost-effective care and use of risk-benefit analyses within health care system |  | Explains the role of the Electronic Health Record (EHR) in prevention of medical errors             | Describes specific cost options for most frequently ordered tests and medications                                                                             |                                                                                                    | Applies risk-benefit analyses in ophthalmic care                                    | Recommends systems re-design for faulty processes     |                  |                                                                                                                                                                                                                                                                                                                                                                                                                                                                                                                                                                                                                                                                                                                                                                                                                                                                                                                                                                                                                                                                                                                                                                                                                                                                                                                                                                                                                                                                                                                                                                                                                                                                                                                         | Utilizes EHR, where available, to order tests and reconcile medications for patients |         | Contributes to reduction of risks of automation and computerized systems by reporting system problems |         |                   |                                                                                                                                                                                                                                                                                                                                                                                                                                                                                                                                                                                                                                                                                                                                                                                                                                                                                                                                                                                                                                                                                                                                                                                                                                                                                                                                                       | Uses information systems for patient care, including literature review |                                                                         |                                                                                                         |                                                                                         | <p>CC</p>                                                     | <p><b>Systems-based Practice 2: System Navigation for Patient-Centered Care</b></p> <table border="1"> <thead> <tr> <th>Level 1</th> <th>Level 2</th> <th>Level 3</th> <th>Level 4</th> <th>Level 5</th> </tr> </thead> <tbody> <tr> <td>Demonstrates knowledge of care coordination</td> <td>Coordinates care of patients in routine clinical situations effectively using the roles of the interprofessional teams</td> <td>Coordinates care of patients in complex clinical situations effectively using the roles of their interprofessional teams</td> <td>Teaches effective coordination of patient-centered care among different disciplines and specialties to junior members of the team</td> <td>Analyzes the process of care coordination and leads in the design and implementation of improvements</td> </tr> <tr> <td>Identifies key elements for safe and effective transitions of care and hand-offs</td> <td>Performs safe and effective transitions of care/hand-offs in routine clinical situations</td> <td>Performs safe and effective transitions of care/hand-offs in complex clinical situations</td> <td>Advocates for safe and effective transitions of care/hand-offs within and across health care delivery systems</td> <td>Improves quality of transitions of care within and across health care delivery systems to optimize patient outcomes</td> </tr> <tr> <td>Demonstrates knowledge of the role of the physician in addressing community health needs and disparities</td> <td>Demonstrates knowledge of local population and community health needs and disparities</td> <td>Identifies specific local health needs and disparities related to ophthalmic care</td> <td>Uses local resources effectively to meet the needs of a patient population and community</td> <td>Participates in changing and adapting practice to provide for the needs of specific populations</td> </tr> </tbody> </table> | Level 1                                                                                                         | Level 2                                                                        | Level 3                                                                                                                                     | Level 4                                                                       | Level 5                                                                                                                 | Demonstrates knowledge of care coordination                             | Coordinates care of patients in routine clinical situations effectively using the roles of the interprofessional teams     | Coordinates care of patients in complex clinical situations effectively using the roles of their interprofessional teams                                        | Teaches effective coordination of patient-centered care among different disciplines and specialties to junior members of the team | Analyzes the process of care coordination and leads in the design and implementation of improvements | Identifies key elements for safe and effective transitions of care and hand-offs | Performs safe and effective transitions of care/hand-offs in routine clinical situations | Performs safe and effective transitions of care/hand-offs in complex clinical situations | Advocates for safe and effective transitions of care/hand-offs within and across health care delivery systems | Improves quality of transitions of care within and across health care delivery systems to optimize patient outcomes | Demonstrates knowledge of the role of the physician in addressing community health needs and disparities | Demonstrates knowledge of local population and community health needs and disparities | Identifies specific local health needs and disparities related to ophthalmic care | Uses local resources effectively to meet the needs of a patient population and community | Participates in changing and adapting practice to provide for the needs of specific populations |
| Has not Achieved Level 1                                                                                                                                                                                               | Level 1                                                                                                                                                                                                                           | Level 2                                                                                                                                                                                                                                                                                                                                                                                                                                                                                                                                                                                                                                                                                                                                                                                                                                                                                                                                                                                                                                                                                                                                                                                                                                                                                                                                                                                                                                                                                                                                        | Level 3                                                                                                                                                                                             | Level 4                                                                                                                                                                          | Level 5                                                                                      |         |         |                                                                                                                                                                                                                        |                                                                                                                                                                                                                                   |                                                                                                                                                                                                                                               |                                                                                                                                                                                                     |                                                                                                                                                                                  |                                                                                                                                               |                                                                                              |  |                                                                                                     |                                                                                                                                                               |                                                                                                    |                                                                                     |                                                       |                  |                                                                                                                                                                                                                                                                                                                                                                                                                                                                                                                                                                                                                                                                                                                                                                                                                                                                                                                                                                                                                                                                                                                                                                                                                                                                                                                                                                                                                                                                                                                                                                                                                                                                                                                         |                                                                                      |         |                                                                                                       |         |                   |                                                                                                                                                                                                                                                                                                                                                                                                                                                                                                                                                                                                                                                                                                                                                                                                                                                                                                                                                                                                                                                                                                                                                                                                                                                                                                                                                       |                                                                        |                                                                         |                                                                                                         |                                                                                         |                                                               |                                                                                                                                                                                                                                                                                                                                                                                                                                                                                                                                                                                                                                                                                                                                                                                                                                                                                                                                                                                                                                                                                                                                                                                                                                                                                                                                                                                                                                                                                                                                                                                                                                                                                                                                                                                                                                                                                                                                             |                                                                                                                 |                                                                                |                                                                                                                                             |                                                                               |                                                                                                                         |                                                                         |                                                                                                                            |                                                                                                                                                                 |                                                                                                                                   |                                                                                                      |                                                                                  |                                                                                          |                                                                                          |                                                                                                               |                                                                                                                     |                                                                                                          |                                                                                       |                                                                                   |                                                                                          |                                                                                                 |
|                                                                                                                                                                                                                        | Describes scenarios in which physician may affect cost-effectiveness in patient care                                                                                                                                              | Describes scenarios in which ophthalmologist may affect cost-effectiveness in patient care                                                                                                                                                                                                                                                                                                                                                                                                                                                                                                                                                                                                                                                                                                                                                                                                                                                                                                                                                                                                                                                                                                                                                                                                                                                                                                                                                                                                                                                     | Often practices cost-effective care                                                                                                                                                                 | Consistently practices cost-effective care                                                                                                                                       | Advocates for cost-effective care and use of risk-benefit analyses within health care system |         |         |                                                                                                                                                                                                                        |                                                                                                                                                                                                                                   |                                                                                                                                                                                                                                               |                                                                                                                                                                                                     |                                                                                                                                                                                  |                                                                                                                                               |                                                                                              |  |                                                                                                     |                                                                                                                                                               |                                                                                                    |                                                                                     |                                                       |                  |                                                                                                                                                                                                                                                                                                                                                                                                                                                                                                                                                                                                                                                                                                                                                                                                                                                                                                                                                                                                                                                                                                                                                                                                                                                                                                                                                                                                                                                                                                                                                                                                                                                                                                                         |                                                                                      |         |                                                                                                       |         |                   |                                                                                                                                                                                                                                                                                                                                                                                                                                                                                                                                                                                                                                                                                                                                                                                                                                                                                                                                                                                                                                                                                                                                                                                                                                                                                                                                                       |                                                                        |                                                                         |                                                                                                         |                                                                                         |                                                               |                                                                                                                                                                                                                                                                                                                                                                                                                                                                                                                                                                                                                                                                                                                                                                                                                                                                                                                                                                                                                                                                                                                                                                                                                                                                                                                                                                                                                                                                                                                                                                                                                                                                                                                                                                                                                                                                                                                                             |                                                                                                                 |                                                                                |                                                                                                                                             |                                                                               |                                                                                                                         |                                                                         |                                                                                                                            |                                                                                                                                                                 |                                                                                                                                   |                                                                                                      |                                                                                  |                                                                                          |                                                                                          |                                                                                                               |                                                                                                                     |                                                                                                          |                                                                                       |                                                                                   |                                                                                          |                                                                                                 |
|                                                                                                                                                                                                                        | Explains the role of the Electronic Health Record (EHR) in prevention of medical errors                                                                                                                                           | Describes specific cost options for most frequently ordered tests and medications                                                                                                                                                                                                                                                                                                                                                                                                                                                                                                                                                                                                                                                                                                                                                                                                                                                                                                                                                                                                                                                                                                                                                                                                                                                                                                                                                                                                                                                              |                                                                                                                                                                                                     | Applies risk-benefit analyses in ophthalmic care                                                                                                                                 | Recommends systems re-design for faulty processes                                            |         |         |                                                                                                                                                                                                                        |                                                                                                                                                                                                                                   |                                                                                                                                                                                                                                               |                                                                                                                                                                                                     |                                                                                                                                                                                  |                                                                                                                                               |                                                                                              |  |                                                                                                     |                                                                                                                                                               |                                                                                                    |                                                                                     |                                                       |                  |                                                                                                                                                                                                                                                                                                                                                                                                                                                                                                                                                                                                                                                                                                                                                                                                                                                                                                                                                                                                                                                                                                                                                                                                                                                                                                                                                                                                                                                                                                                                                                                                                                                                                                                         |                                                                                      |         |                                                                                                       |         |                   |                                                                                                                                                                                                                                                                                                                                                                                                                                                                                                                                                                                                                                                                                                                                                                                                                                                                                                                                                                                                                                                                                                                                                                                                                                                                                                                                                       |                                                                        |                                                                         |                                                                                                         |                                                                                         |                                                               |                                                                                                                                                                                                                                                                                                                                                                                                                                                                                                                                                                                                                                                                                                                                                                                                                                                                                                                                                                                                                                                                                                                                                                                                                                                                                                                                                                                                                                                                                                                                                                                                                                                                                                                                                                                                                                                                                                                                             |                                                                                                                 |                                                                                |                                                                                                                                             |                                                                               |                                                                                                                         |                                                                         |                                                                                                                            |                                                                                                                                                                 |                                                                                                                                   |                                                                                                      |                                                                                  |                                                                                          |                                                                                          |                                                                                                               |                                                                                                                     |                                                                                                          |                                                                                       |                                                                                   |                                                                                          |                                                                                                 |
|                                                                                                                                                                                                                        |                                                                                                                                                                                                                                   | Utilizes EHR, where available, to order tests and reconcile medications for patients                                                                                                                                                                                                                                                                                                                                                                                                                                                                                                                                                                                                                                                                                                                                                                                                                                                                                                                                                                                                                                                                                                                                                                                                                                                                                                                                                                                                                                                           |                                                                                                                                                                                                     | Contributes to reduction of risks of automation and computerized systems by reporting system problems                                                                            |                                                                                              |         |         |                                                                                                                                                                                                                        |                                                                                                                                                                                                                                   |                                                                                                                                                                                                                                               |                                                                                                                                                                                                     |                                                                                                                                                                                  |                                                                                                                                               |                                                                                              |  |                                                                                                     |                                                                                                                                                               |                                                                                                    |                                                                                     |                                                       |                  |                                                                                                                                                                                                                                                                                                                                                                                                                                                                                                                                                                                                                                                                                                                                                                                                                                                                                                                                                                                                                                                                                                                                                                                                                                                                                                                                                                                                                                                                                                                                                                                                                                                                                                                         |                                                                                      |         |                                                                                                       |         |                   |                                                                                                                                                                                                                                                                                                                                                                                                                                                                                                                                                                                                                                                                                                                                                                                                                                                                                                                                                                                                                                                                                                                                                                                                                                                                                                                                                       |                                                                        |                                                                         |                                                                                                         |                                                                                         |                                                               |                                                                                                                                                                                                                                                                                                                                                                                                                                                                                                                                                                                                                                                                                                                                                                                                                                                                                                                                                                                                                                                                                                                                                                                                                                                                                                                                                                                                                                                                                                                                                                                                                                                                                                                                                                                                                                                                                                                                             |                                                                                                                 |                                                                                |                                                                                                                                             |                                                                               |                                                                                                                         |                                                                         |                                                                                                                            |                                                                                                                                                                 |                                                                                                                                   |                                                                                                      |                                                                                  |                                                                                          |                                                                                          |                                                                                                               |                                                                                                                     |                                                                                                          |                                                                                       |                                                                                   |                                                                                          |                                                                                                 |
|                                                                                                                                                                                                                        |                                                                                                                                                                                                                                   | Uses information systems for patient care, including literature review                                                                                                                                                                                                                                                                                                                                                                                                                                                                                                                                                                                                                                                                                                                                                                                                                                                                                                                                                                                                                                                                                                                                                                                                                                                                                                                                                                                                                                                                         |                                                                                                                                                                                                     |                                                                                                                                                                                  |                                                                                              |         |         |                                                                                                                                                                                                                        |                                                                                                                                                                                                                                   |                                                                                                                                                                                                                                               |                                                                                                                                                                                                     |                                                                                                                                                                                  |                                                                                                                                               |                                                                                              |  |                                                                                                     |                                                                                                                                                               |                                                                                                    |                                                                                     |                                                       |                  |                                                                                                                                                                                                                                                                                                                                                                                                                                                                                                                                                                                                                                                                                                                                                                                                                                                                                                                                                                                                                                                                                                                                                                                                                                                                                                                                                                                                                                                                                                                                                                                                                                                                                                                         |                                                                                      |         |                                                                                                       |         |                   |                                                                                                                                                                                                                                                                                                                                                                                                                                                                                                                                                                                                                                                                                                                                                                                                                                                                                                                                                                                                                                                                                                                                                                                                                                                                                                                                                       |                                                                        |                                                                         |                                                                                                         |                                                                                         |                                                               |                                                                                                                                                                                                                                                                                                                                                                                                                                                                                                                                                                                                                                                                                                                                                                                                                                                                                                                                                                                                                                                                                                                                                                                                                                                                                                                                                                                                                                                                                                                                                                                                                                                                                                                                                                                                                                                                                                                                             |                                                                                                                 |                                                                                |                                                                                                                                             |                                                                               |                                                                                                                         |                                                                         |                                                                                                                            |                                                                                                                                                                 |                                                                                                                                   |                                                                                                      |                                                                                  |                                                                                          |                                                                                          |                                                                                                               |                                                                                                                     |                                                                                                          |                                                                                       |                                                                                   |                                                                                          |                                                                                                 |
| Level 1                                                                                                                                                                                                                | Level 2                                                                                                                                                                                                                           | Level 3                                                                                                                                                                                                                                                                                                                                                                                                                                                                                                                                                                                                                                                                                                                                                                                                                                                                                                                                                                                                                                                                                                                                                                                                                                                                                                                                                                                                                                                                                                                                        | Level 4                                                                                                                                                                                             | Level 5                                                                                                                                                                          |                                                                                              |         |         |                                                                                                                                                                                                                        |                                                                                                                                                                                                                                   |                                                                                                                                                                                                                                               |                                                                                                                                                                                                     |                                                                                                                                                                                  |                                                                                                                                               |                                                                                              |  |                                                                                                     |                                                                                                                                                               |                                                                                                    |                                                                                     |                                                       |                  |                                                                                                                                                                                                                                                                                                                                                                                                                                                                                                                                                                                                                                                                                                                                                                                                                                                                                                                                                                                                                                                                                                                                                                                                                                                                                                                                                                                                                                                                                                                                                                                                                                                                                                                         |                                                                                      |         |                                                                                                       |         |                   |                                                                                                                                                                                                                                                                                                                                                                                                                                                                                                                                                                                                                                                                                                                                                                                                                                                                                                                                                                                                                                                                                                                                                                                                                                                                                                                                                       |                                                                        |                                                                         |                                                                                                         |                                                                                         |                                                               |                                                                                                                                                                                                                                                                                                                                                                                                                                                                                                                                                                                                                                                                                                                                                                                                                                                                                                                                                                                                                                                                                                                                                                                                                                                                                                                                                                                                                                                                                                                                                                                                                                                                                                                                                                                                                                                                                                                                             |                                                                                                                 |                                                                                |                                                                                                                                             |                                                                               |                                                                                                                         |                                                                         |                                                                                                                            |                                                                                                                                                                 |                                                                                                                                   |                                                                                                      |                                                                                  |                                                                                          |                                                                                          |                                                                                                               |                                                                                                                     |                                                                                                          |                                                                                       |                                                                                   |                                                                                          |                                                                                                 |
| Demonstrates knowledge of care coordination                                                                                                                                                                            | Coordinates care of patients in routine clinical situations effectively using the roles of the interprofessional teams                                                                                                            | Coordinates care of patients in complex clinical situations effectively using the roles of their interprofessional teams                                                                                                                                                                                                                                                                                                                                                                                                                                                                                                                                                                                                                                                                                                                                                                                                                                                                                                                                                                                                                                                                                                                                                                                                                                                                                                                                                                                                                       | Teaches effective coordination of patient-centered care among different disciplines and specialties to junior members of the team                                                                   | Analyzes the process of care coordination and leads in the design and implementation of improvements                                                                             |                                                                                              |         |         |                                                                                                                                                                                                                        |                                                                                                                                                                                                                                   |                                                                                                                                                                                                                                               |                                                                                                                                                                                                     |                                                                                                                                                                                  |                                                                                                                                               |                                                                                              |  |                                                                                                     |                                                                                                                                                               |                                                                                                    |                                                                                     |                                                       |                  |                                                                                                                                                                                                                                                                                                                                                                                                                                                                                                                                                                                                                                                                                                                                                                                                                                                                                                                                                                                                                                                                                                                                                                                                                                                                                                                                                                                                                                                                                                                                                                                                                                                                                                                         |                                                                                      |         |                                                                                                       |         |                   |                                                                                                                                                                                                                                                                                                                                                                                                                                                                                                                                                                                                                                                                                                                                                                                                                                                                                                                                                                                                                                                                                                                                                                                                                                                                                                                                                       |                                                                        |                                                                         |                                                                                                         |                                                                                         |                                                               |                                                                                                                                                                                                                                                                                                                                                                                                                                                                                                                                                                                                                                                                                                                                                                                                                                                                                                                                                                                                                                                                                                                                                                                                                                                                                                                                                                                                                                                                                                                                                                                                                                                                                                                                                                                                                                                                                                                                             |                                                                                                                 |                                                                                |                                                                                                                                             |                                                                               |                                                                                                                         |                                                                         |                                                                                                                            |                                                                                                                                                                 |                                                                                                                                   |                                                                                                      |                                                                                  |                                                                                          |                                                                                          |                                                                                                               |                                                                                                                     |                                                                                                          |                                                                                       |                                                                                   |                                                                                          |                                                                                                 |
| Identifies key elements for safe and effective transitions of care and hand-offs                                                                                                                                       | Performs safe and effective transitions of care/hand-offs in routine clinical situations                                                                                                                                          | Performs safe and effective transitions of care/hand-offs in complex clinical situations                                                                                                                                                                                                                                                                                                                                                                                                                                                                                                                                                                                                                                                                                                                                                                                                                                                                                                                                                                                                                                                                                                                                                                                                                                                                                                                                                                                                                                                       | Advocates for safe and effective transitions of care/hand-offs within and across health care delivery systems                                                                                       | Improves quality of transitions of care within and across health care delivery systems to optimize patient outcomes                                                              |                                                                                              |         |         |                                                                                                                                                                                                                        |                                                                                                                                                                                                                                   |                                                                                                                                                                                                                                               |                                                                                                                                                                                                     |                                                                                                                                                                                  |                                                                                                                                               |                                                                                              |  |                                                                                                     |                                                                                                                                                               |                                                                                                    |                                                                                     |                                                       |                  |                                                                                                                                                                                                                                                                                                                                                                                                                                                                                                                                                                                                                                                                                                                                                                                                                                                                                                                                                                                                                                                                                                                                                                                                                                                                                                                                                                                                                                                                                                                                                                                                                                                                                                                         |                                                                                      |         |                                                                                                       |         |                   |                                                                                                                                                                                                                                                                                                                                                                                                                                                                                                                                                                                                                                                                                                                                                                                                                                                                                                                                                                                                                                                                                                                                                                                                                                                                                                                                                       |                                                                        |                                                                         |                                                                                                         |                                                                                         |                                                               |                                                                                                                                                                                                                                                                                                                                                                                                                                                                                                                                                                                                                                                                                                                                                                                                                                                                                                                                                                                                                                                                                                                                                                                                                                                                                                                                                                                                                                                                                                                                                                                                                                                                                                                                                                                                                                                                                                                                             |                                                                                                                 |                                                                                |                                                                                                                                             |                                                                               |                                                                                                                         |                                                                         |                                                                                                                            |                                                                                                                                                                 |                                                                                                                                   |                                                                                                      |                                                                                  |                                                                                          |                                                                                          |                                                                                                               |                                                                                                                     |                                                                                                          |                                                                                       |                                                                                   |                                                                                          |                                                                                                 |
| Demonstrates knowledge of the role of the physician in addressing community health needs and disparities                                                                                                               | Demonstrates knowledge of local population and community health needs and disparities                                                                                                                                             | Identifies specific local health needs and disparities related to ophthalmic care                                                                                                                                                                                                                                                                                                                                                                                                                                                                                                                                                                                                                                                                                                                                                                                                                                                                                                                                                                                                                                                                                                                                                                                                                                                                                                                                                                                                                                                              | Uses local resources effectively to meet the needs of a patient population and community                                                                                                            | Participates in changing and adapting practice to provide for the needs of specific populations                                                                                  |                                                                                              |         |         |                                                                                                                                                                                                                        |                                                                                                                                                                                                                                   |                                                                                                                                                                                                                                               |                                                                                                                                                                                                     |                                                                                                                                                                                  |                                                                                                                                               |                                                                                              |  |                                                                                                     |                                                                                                                                                               |                                                                                                    |                                                                                     |                                                       |                  |                                                                                                                                                                                                                                                                                                                                                                                                                                                                                                                                                                                                                                                                                                                                                                                                                                                                                                                                                                                                                                                                                                                                                                                                                                                                                                                                                                                                                                                                                                                                                                                                                                                                                                                         |                                                                                      |         |                                                                                                       |         |                   |                                                                                                                                                                                                                                                                                                                                                                                                                                                                                                                                                                                                                                                                                                                                                                                                                                                                                                                                                                                                                                                                                                                                                                                                                                                                                                                                                       |                                                                        |                                                                         |                                                                                                         |                                                                                         |                                                               |                                                                                                                                                                                                                                                                                                                                                                                                                                                                                                                                                                                                                                                                                                                                                                                                                                                                                                                                                                                                                                                                                                                                                                                                                                                                                                                                                                                                                                                                                                                                                                                                                                                                                                                                                                                                                                                                                                                                             |                                                                                                                 |                                                                                |                                                                                                                                             |                                                                               |                                                                                                                         |                                                                         |                                                                                                                            |                                                                                                                                                                 |                                                                                                                                   |                                                                                                      |                                                                                  |                                                                                          |                                                                                          |                                                                                                               |                                                                                                                     |                                                                                                          |                                                                                       |                                                                                   |                                                                                          |                                                                                                 |
| <p><b>Ophthalmology</b></p>                                                                                                                                                                                            | <p>Teams<br/>PS</p>                                                                                                                                                                                                               | <p><b>SBP-3: Work in inter-professional teams to enhance patient safety, identify system errors, and implement solutions</b></p> <table border="1"> <thead> <tr> <th>Has not Achieved Level 1</th> <th>Level 1</th> <th>Level 2</th> <th>Level 3</th> <th>Level 4</th> <th>Level 5</th> </tr> </thead> <tbody> <tr> <td></td> <td>Describes epidemiology of medical errors and differences between medical errors, near misses, and sentinel events</td> <td>Reports problematic processes, including errors and near misses to supervisor</td> <td>Analyzes causes of adverse events through root cause analysis (RCA)</td> <td>Develops content for and facilitates patient safety morbidity and mortality (M&amp;M) conference focusing on systems-based errors in patient care</td> <td>Creates curriculum to teach teamwork and communication skills to health care professionals</td> </tr> <tr> <td></td> <td>Describes role of teamwork and communication failure as a leading cause of preventable patient harm</td> <td>Defines process for safe and efficient patient hand-offs, including basic communication techniques</td> <td>Applies process for safe and efficient patient hand-offs, including basic communication techniques</td> <td>Supervises communication process for patient hand-offs and on-call responsibilities</td> <td></td> </tr> <tr> <td></td> <td></td> <td></td> <td></td> <td>Analyzes shared team experience (e.g., procedure) with debriefing to solve problems</td> <td></td> </tr> </tbody> </table> | Has not Achieved Level 1                                                                                                                                                                            | Level 1                                                                                                                                                                          | Level 2                                                                                      | Level 3 | Level 4 | Level 5                                                                                                                                                                                                                |                                                                                                                                                                                                                                   | Describes epidemiology of medical errors and differences between medical errors, near misses, and sentinel events                                                                                                                             | Reports problematic processes, including errors and near misses to supervisor                                                                                                                       | Analyzes causes of adverse events through root cause analysis (RCA)                                                                                                              | Develops content for and facilitates patient safety morbidity and mortality (M&M) conference focusing on systems-based errors in patient care | Creates curriculum to teach teamwork and communication skills to health care professionals   |  | Describes role of teamwork and communication failure as a leading cause of preventable patient harm | Defines process for safe and efficient patient hand-offs, including basic communication techniques                                                            | Applies process for safe and efficient patient hand-offs, including basic communication techniques | Supervises communication process for patient hand-offs and on-call responsibilities |                                                       |                  |                                                                                                                                                                                                                                                                                                                                                                                                                                                                                                                                                                                                                                                                                                                                                                                                                                                                                                                                                                                                                                                                                                                                                                                                                                                                                                                                                                                                                                                                                                                                                                                                                                                                                                                         |                                                                                      |         | Analyzes shared team experience (e.g., procedure) with debriefing to solve problems                   |         | <p>HC Systems</p> | <p><b>Systems-Based Practice 3: Physician Role in Health Care Systems</b></p> <table border="1"> <thead> <tr> <th>Level 1</th> <th>Level 2</th> <th>Level 3</th> <th>Level 4</th> <th>Level 5</th> </tr> </thead> <tbody> <tr> <td>Describes basic health care systems and access models (e.g., government, private, public, uninsured care)</td> <td>Describes how different system types require the physician to deliver care effectively with available resources</td> <td>Optimizes patient care given available resources</td> <td>Advocates for patient care needs beyond patients' available resources (e.g., community resources, patient assistance resources, telehealth)</td> <td>Participates in health policy advocacy activities</td> </tr> <tr> <td>Demonstrates use of electronic medical record</td> <td>Identifies the documentation required for billing and coding compliance</td> <td>Describes knowledge domains for effective transition to practice (e.g., information technology, legal, billing and coding)</td> <td>Demonstrates administrative knowledge needed for transition to practice (e.g., contract negotiations, malpractice insurance, government regulation, compliance)</td> <td>Analyzes individual practice patterns and professional requirements in preparation for practice</td> </tr> </tbody> </table> | Level 1                                                                | Level 2                                                                 | Level 3                                                                                                 | Level 4                                                                                 | Level 5                                                       | Describes basic health care systems and access models (e.g., government, private, public, uninsured care)                                                                                                                                                                                                                                                                                                                                                                                                                                                                                                                                                                                                                                                                                                                                                                                                                                                                                                                                                                                                                                                                                                                                                                                                                                                                                                                                                                                                                                                                                                                                                                                                                                                                                                                                                                                                                                   | Describes how different system types require the physician to deliver care effectively with available resources | Optimizes patient care given available resources                               | Advocates for patient care needs beyond patients' available resources (e.g., community resources, patient assistance resources, telehealth) | Participates in health policy advocacy activities                             | Demonstrates use of electronic medical record                                                                           | Identifies the documentation required for billing and coding compliance | Describes knowledge domains for effective transition to practice (e.g., information technology, legal, billing and coding) | Demonstrates administrative knowledge needed for transition to practice (e.g., contract negotiations, malpractice insurance, government regulation, compliance) | Analyzes individual practice patterns and professional requirements in preparation for practice                                   |                                                                                                      |                                                                                  |                                                                                          |                                                                                          |                                                                                                               |                                                                                                                     |                                                                                                          |                                                                                       |                                                                                   |                                                                                          |                                                                                                 |
| Has not Achieved Level 1                                                                                                                                                                                               | Level 1                                                                                                                                                                                                                           | Level 2                                                                                                                                                                                                                                                                                                                                                                                                                                                                                                                                                                                                                                                                                                                                                                                                                                                                                                                                                                                                                                                                                                                                                                                                                                                                                                                                                                                                                                                                                                                                        | Level 3                                                                                                                                                                                             | Level 4                                                                                                                                                                          | Level 5                                                                                      |         |         |                                                                                                                                                                                                                        |                                                                                                                                                                                                                                   |                                                                                                                                                                                                                                               |                                                                                                                                                                                                     |                                                                                                                                                                                  |                                                                                                                                               |                                                                                              |  |                                                                                                     |                                                                                                                                                               |                                                                                                    |                                                                                     |                                                       |                  |                                                                                                                                                                                                                                                                                                                                                                                                                                                                                                                                                                                                                                                                                                                                                                                                                                                                                                                                                                                                                                                                                                                                                                                                                                                                                                                                                                                                                                                                                                                                                                                                                                                                                                                         |                                                                                      |         |                                                                                                       |         |                   |                                                                                                                                                                                                                                                                                                                                                                                                                                                                                                                                                                                                                                                                                                                                                                                                                                                                                                                                                                                                                                                                                                                                                                                                                                                                                                                                                       |                                                                        |                                                                         |                                                                                                         |                                                                                         |                                                               |                                                                                                                                                                                                                                                                                                                                                                                                                                                                                                                                                                                                                                                                                                                                                                                                                                                                                                                                                                                                                                                                                                                                                                                                                                                                                                                                                                                                                                                                                                                                                                                                                                                                                                                                                                                                                                                                                                                                             |                                                                                                                 |                                                                                |                                                                                                                                             |                                                                               |                                                                                                                         |                                                                         |                                                                                                                            |                                                                                                                                                                 |                                                                                                                                   |                                                                                                      |                                                                                  |                                                                                          |                                                                                          |                                                                                                               |                                                                                                                     |                                                                                                          |                                                                                       |                                                                                   |                                                                                          |                                                                                                 |
|                                                                                                                                                                                                                        | Describes epidemiology of medical errors and differences between medical errors, near misses, and sentinel events                                                                                                                 | Reports problematic processes, including errors and near misses to supervisor                                                                                                                                                                                                                                                                                                                                                                                                                                                                                                                                                                                                                                                                                                                                                                                                                                                                                                                                                                                                                                                                                                                                                                                                                                                                                                                                                                                                                                                                  | Analyzes causes of adverse events through root cause analysis (RCA)                                                                                                                                 | Develops content for and facilitates patient safety morbidity and mortality (M&M) conference focusing on systems-based errors in patient care                                    | Creates curriculum to teach teamwork and communication skills to health care professionals   |         |         |                                                                                                                                                                                                                        |                                                                                                                                                                                                                                   |                                                                                                                                                                                                                                               |                                                                                                                                                                                                     |                                                                                                                                                                                  |                                                                                                                                               |                                                                                              |  |                                                                                                     |                                                                                                                                                               |                                                                                                    |                                                                                     |                                                       |                  |                                                                                                                                                                                                                                                                                                                                                                                                                                                                                                                                                                                                                                                                                                                                                                                                                                                                                                                                                                                                                                                                                                                                                                                                                                                                                                                                                                                                                                                                                                                                                                                                                                                                                                                         |                                                                                      |         |                                                                                                       |         |                   |                                                                                                                                                                                                                                                                                                                                                                                                                                                                                                                                                                                                                                                                                                                                                                                                                                                                                                                                                                                                                                                                                                                                                                                                                                                                                                                                                       |                                                                        |                                                                         |                                                                                                         |                                                                                         |                                                               |                                                                                                                                                                                                                                                                                                                                                                                                                                                                                                                                                                                                                                                                                                                                                                                                                                                                                                                                                                                                                                                                                                                                                                                                                                                                                                                                                                                                                                                                                                                                                                                                                                                                                                                                                                                                                                                                                                                                             |                                                                                                                 |                                                                                |                                                                                                                                             |                                                                               |                                                                                                                         |                                                                         |                                                                                                                            |                                                                                                                                                                 |                                                                                                                                   |                                                                                                      |                                                                                  |                                                                                          |                                                                                          |                                                                                                               |                                                                                                                     |                                                                                                          |                                                                                       |                                                                                   |                                                                                          |                                                                                                 |
|                                                                                                                                                                                                                        | Describes role of teamwork and communication failure as a leading cause of preventable patient harm                                                                                                                               | Defines process for safe and efficient patient hand-offs, including basic communication techniques                                                                                                                                                                                                                                                                                                                                                                                                                                                                                                                                                                                                                                                                                                                                                                                                                                                                                                                                                                                                                                                                                                                                                                                                                                                                                                                                                                                                                                             | Applies process for safe and efficient patient hand-offs, including basic communication techniques                                                                                                  | Supervises communication process for patient hand-offs and on-call responsibilities                                                                                              |                                                                                              |         |         |                                                                                                                                                                                                                        |                                                                                                                                                                                                                                   |                                                                                                                                                                                                                                               |                                                                                                                                                                                                     |                                                                                                                                                                                  |                                                                                                                                               |                                                                                              |  |                                                                                                     |                                                                                                                                                               |                                                                                                    |                                                                                     |                                                       |                  |                                                                                                                                                                                                                                                                                                                                                                                                                                                                                                                                                                                                                                                                                                                                                                                                                                                                                                                                                                                                                                                                                                                                                                                                                                                                                                                                                                                                                                                                                                                                                                                                                                                                                                                         |                                                                                      |         |                                                                                                       |         |                   |                                                                                                                                                                                                                                                                                                                                                                                                                                                                                                                                                                                                                                                                                                                                                                                                                                                                                                                                                                                                                                                                                                                                                                                                                                                                                                                                                       |                                                                        |                                                                         |                                                                                                         |                                                                                         |                                                               |                                                                                                                                                                                                                                                                                                                                                                                                                                                                                                                                                                                                                                                                                                                                                                                                                                                                                                                                                                                                                                                                                                                                                                                                                                                                                                                                                                                                                                                                                                                                                                                                                                                                                                                                                                                                                                                                                                                                             |                                                                                                                 |                                                                                |                                                                                                                                             |                                                                               |                                                                                                                         |                                                                         |                                                                                                                            |                                                                                                                                                                 |                                                                                                                                   |                                                                                                      |                                                                                  |                                                                                          |                                                                                          |                                                                                                               |                                                                                                                     |                                                                                                          |                                                                                       |                                                                                   |                                                                                          |                                                                                                 |
|                                                                                                                                                                                                                        |                                                                                                                                                                                                                                   |                                                                                                                                                                                                                                                                                                                                                                                                                                                                                                                                                                                                                                                                                                                                                                                                                                                                                                                                                                                                                                                                                                                                                                                                                                                                                                                                                                                                                                                                                                                                                |                                                                                                                                                                                                     | Analyzes shared team experience (e.g., procedure) with debriefing to solve problems                                                                                              |                                                                                              |         |         |                                                                                                                                                                                                                        |                                                                                                                                                                                                                                   |                                                                                                                                                                                                                                               |                                                                                                                                                                                                     |                                                                                                                                                                                  |                                                                                                                                               |                                                                                              |  |                                                                                                     |                                                                                                                                                               |                                                                                                    |                                                                                     |                                                       |                  |                                                                                                                                                                                                                                                                                                                                                                                                                                                                                                                                                                                                                                                                                                                                                                                                                                                                                                                                                                                                                                                                                                                                                                                                                                                                                                                                                                                                                                                                                                                                                                                                                                                                                                                         |                                                                                      |         |                                                                                                       |         |                   |                                                                                                                                                                                                                                                                                                                                                                                                                                                                                                                                                                                                                                                                                                                                                                                                                                                                                                                                                                                                                                                                                                                                                                                                                                                                                                                                                       |                                                                        |                                                                         |                                                                                                         |                                                                                         |                                                               |                                                                                                                                                                                                                                                                                                                                                                                                                                                                                                                                                                                                                                                                                                                                                                                                                                                                                                                                                                                                                                                                                                                                                                                                                                                                                                                                                                                                                                                                                                                                                                                                                                                                                                                                                                                                                                                                                                                                             |                                                                                                                 |                                                                                |                                                                                                                                             |                                                                               |                                                                                                                         |                                                                         |                                                                                                                            |                                                                                                                                                                 |                                                                                                                                   |                                                                                                      |                                                                                  |                                                                                          |                                                                                          |                                                                                                               |                                                                                                                     |                                                                                                          |                                                                                       |                                                                                   |                                                                                          |                                                                                                 |
| Level 1                                                                                                                                                                                                                | Level 2                                                                                                                                                                                                                           | Level 3                                                                                                                                                                                                                                                                                                                                                                                                                                                                                                                                                                                                                                                                                                                                                                                                                                                                                                                                                                                                                                                                                                                                                                                                                                                                                                                                                                                                                                                                                                                                        | Level 4                                                                                                                                                                                             | Level 5                                                                                                                                                                          |                                                                                              |         |         |                                                                                                                                                                                                                        |                                                                                                                                                                                                                                   |                                                                                                                                                                                                                                               |                                                                                                                                                                                                     |                                                                                                                                                                                  |                                                                                                                                               |                                                                                              |  |                                                                                                     |                                                                                                                                                               |                                                                                                    |                                                                                     |                                                       |                  |                                                                                                                                                                                                                                                                                                                                                                                                                                                                                                                                                                                                                                                                                                                                                                                                                                                                                                                                                                                                                                                                                                                                                                                                                                                                                                                                                                                                                                                                                                                                                                                                                                                                                                                         |                                                                                      |         |                                                                                                       |         |                   |                                                                                                                                                                                                                                                                                                                                                                                                                                                                                                                                                                                                                                                                                                                                                                                                                                                                                                                                                                                                                                                                                                                                                                                                                                                                                                                                                       |                                                                        |                                                                         |                                                                                                         |                                                                                         |                                                               |                                                                                                                                                                                                                                                                                                                                                                                                                                                                                                                                                                                                                                                                                                                                                                                                                                                                                                                                                                                                                                                                                                                                                                                                                                                                                                                                                                                                                                                                                                                                                                                                                                                                                                                                                                                                                                                                                                                                             |                                                                                                                 |                                                                                |                                                                                                                                             |                                                                               |                                                                                                                         |                                                                         |                                                                                                                            |                                                                                                                                                                 |                                                                                                                                   |                                                                                                      |                                                                                  |                                                                                          |                                                                                          |                                                                                                               |                                                                                                                     |                                                                                                          |                                                                                       |                                                                                   |                                                                                          |                                                                                                 |
| Describes basic health care systems and access models (e.g., government, private, public, uninsured care)                                                                                                              | Describes how different system types require the physician to deliver care effectively with available resources                                                                                                                   | Optimizes patient care given available resources                                                                                                                                                                                                                                                                                                                                                                                                                                                                                                                                                                                                                                                                                                                                                                                                                                                                                                                                                                                                                                                                                                                                                                                                                                                                                                                                                                                                                                                                                               | Advocates for patient care needs beyond patients' available resources (e.g., community resources, patient assistance resources, telehealth)                                                         | Participates in health policy advocacy activities                                                                                                                                |                                                                                              |         |         |                                                                                                                                                                                                                        |                                                                                                                                                                                                                                   |                                                                                                                                                                                                                                               |                                                                                                                                                                                                     |                                                                                                                                                                                  |                                                                                                                                               |                                                                                              |  |                                                                                                     |                                                                                                                                                               |                                                                                                    |                                                                                     |                                                       |                  |                                                                                                                                                                                                                                                                                                                                                                                                                                                                                                                                                                                                                                                                                                                                                                                                                                                                                                                                                                                                                                                                                                                                                                                                                                                                                                                                                                                                                                                                                                                                                                                                                                                                                                                         |                                                                                      |         |                                                                                                       |         |                   |                                                                                                                                                                                                                                                                                                                                                                                                                                                                                                                                                                                                                                                                                                                                                                                                                                                                                                                                                                                                                                                                                                                                                                                                                                                                                                                                                       |                                                                        |                                                                         |                                                                                                         |                                                                                         |                                                               |                                                                                                                                                                                                                                                                                                                                                                                                                                                                                                                                                                                                                                                                                                                                                                                                                                                                                                                                                                                                                                                                                                                                                                                                                                                                                                                                                                                                                                                                                                                                                                                                                                                                                                                                                                                                                                                                                                                                             |                                                                                                                 |                                                                                |                                                                                                                                             |                                                                               |                                                                                                                         |                                                                         |                                                                                                                            |                                                                                                                                                                 |                                                                                                                                   |                                                                                                      |                                                                                  |                                                                                          |                                                                                          |                                                                                                               |                                                                                                                     |                                                                                                          |                                                                                       |                                                                                   |                                                                                          |                                                                                                 |
| Demonstrates use of electronic medical record                                                                                                                                                                          | Identifies the documentation required for billing and coding compliance                                                                                                                                                           | Describes knowledge domains for effective transition to practice (e.g., information technology, legal, billing and coding)                                                                                                                                                                                                                                                                                                                                                                                                                                                                                                                                                                                                                                                                                                                                                                                                                                                                                                                                                                                                                                                                                                                                                                                                                                                                                                                                                                                                                     | Demonstrates administrative knowledge needed for transition to practice (e.g., contract negotiations, malpractice insurance, government regulation, compliance)                                     | Analyzes individual practice patterns and professional requirements in preparation for practice                                                                                  |                                                                                              |         |         |                                                                                                                                                                                                                        |                                                                                                                                                                                                                                   |                                                                                                                                                                                                                                               |                                                                                                                                                                                                     |                                                                                                                                                                                  |                                                                                                                                               |                                                                                              |  |                                                                                                     |                                                                                                                                                               |                                                                                                    |                                                                                     |                                                       |                  |                                                                                                                                                                                                                                                                                                                                                                                                                                                                                                                                                                                                                                                                                                                                                                                                                                                                                                                                                                                                                                                                                                                                                                                                                                                                                                                                                                                                                                                                                                                                                                                                                                                                                                                         |                                                                                      |         |                                                                                                       |         |                   |                                                                                                                                                                                                                                                                                                                                                                                                                                                                                                                                                                                                                                                                                                                                                                                                                                                                                                                                                                                                                                                                                                                                                                                                                                                                                                                                                       |                                                                        |                                                                         |                                                                                                         |                                                                                         |                                                               |                                                                                                                                                                                                                                                                                                                                                                                                                                                                                                                                                                                                                                                                                                                                                                                                                                                                                                                                                                                                                                                                                                                                                                                                                                                                                                                                                                                                                                                                                                                                                                                                                                                                                                                                                                                                                                                                                                                                             |                                                                                                                 |                                                                                |                                                                                                                                             |                                                                               |                                                                                                                         |                                                                         |                                                                                                                            |                                                                                                                                                                 |                                                                                                                                   |                                                                                                      |                                                                                  |                                                                                          |                                                                                          |                                                                                                               |                                                                                                                     |                                                                                                          |                                                                                       |                                                                                   |                                                                                          |                                                                                                 |
| <p><b>Orthopaedic Surgery</b></p>                                                                                                                                                                                      | <p>HC Systems<br/>HC Costs</p>                                                                                                                                                                                                    | <p><b>Systems thinking, including cost-effective practice – Systems-based Practice</b></p> <table border="1"> <thead> <tr> <th>Level 1</th> <th>Level 2</th> <th>Level 3</th> <th>Level 4</th> <th>Level 5</th> </tr> </thead> <tbody> <tr> <td> <ul style="list-style-type: none"> <li>Describes basic levels of systems of care (e.g., self-management to societal)</li> <li>Understands the economic challenges of patient care in the health care system</li> </ul> </td> <td> <ul style="list-style-type: none"> <li>Gives examples of cost and value implications of care he or she provides (e.g., gives examples of alternate sites of care resulting in different costs for individual patients)</li> </ul> </td> <td> <ul style="list-style-type: none"> <li>Orders and schedules tests in appropriate systems for individual patients balancing expenses and quality</li> <li>Successfully navigates the economic differences of the health care system</li> </ul> </td> <td> <ul style="list-style-type: none"> <li>Effectively manages clinic team and schedules for patient and workflow efficiency</li> <li>Uses evidence-based guidelines for cost-effective care</li> </ul> </td> <td> <ul style="list-style-type: none"> <li>Leads systems change at micro and macro level (e.g., manages operating room [OR] team and patient flow in a multi-case OR day)</li> </ul> </td> </tr> </tbody> </table>                                                                                                                         | Level 1                                                                                                                                                                                             | Level 2                                                                                                                                                                          | Level 3                                                                                      | Level 4 | Level 5 | <ul style="list-style-type: none"> <li>Describes basic levels of systems of care (e.g., self-management to societal)</li> <li>Understands the economic challenges of patient care in the health care system</li> </ul> | <ul style="list-style-type: none"> <li>Gives examples of cost and value implications of care he or she provides (e.g., gives examples of alternate sites of care resulting in different costs for individual patients)</li> </ul> | <ul style="list-style-type: none"> <li>Orders and schedules tests in appropriate systems for individual patients balancing expenses and quality</li> <li>Successfully navigates the economic differences of the health care system</li> </ul> | <ul style="list-style-type: none"> <li>Effectively manages clinic team and schedules for patient and workflow efficiency</li> <li>Uses evidence-based guidelines for cost-effective care</li> </ul> | <ul style="list-style-type: none"> <li>Leads systems change at micro and macro level (e.g., manages operating room [OR] team and patient flow in a multi-case OR day)</li> </ul> |                                                                                                                                               |                                                                                              |  |                                                                                                     |                                                                                                                                                               |                                                                                                    |                                                                                     |                                                       |                  |                                                                                                                                                                                                                                                                                                                                                                                                                                                                                                                                                                                                                                                                                                                                                                                                                                                                                                                                                                                                                                                                                                                                                                                                                                                                                                                                                                                                                                                                                                                                                                                                                                                                                                                         |                                                                                      |         |                                                                                                       |         |                   |                                                                                                                                                                                                                                                                                                                                                                                                                                                                                                                                                                                                                                                                                                                                                                                                                                                                                                                                                                                                                                                                                                                                                                                                                                                                                                                                                       |                                                                        |                                                                         |                                                                                                         |                                                                                         |                                                               |                                                                                                                                                                                                                                                                                                                                                                                                                                                                                                                                                                                                                                                                                                                                                                                                                                                                                                                                                                                                                                                                                                                                                                                                                                                                                                                                                                                                                                                                                                                                                                                                                                                                                                                                                                                                                                                                                                                                             |                                                                                                                 |                                                                                |                                                                                                                                             |                                                                               |                                                                                                                         |                                                                         |                                                                                                                            |                                                                                                                                                                 |                                                                                                                                   |                                                                                                      |                                                                                  |                                                                                          |                                                                                          |                                                                                                               |                                                                                                                     |                                                                                                          |                                                                                       |                                                                                   |                                                                                          |                                                                                                 |
| Level 1                                                                                                                                                                                                                | Level 2                                                                                                                                                                                                                           | Level 3                                                                                                                                                                                                                                                                                                                                                                                                                                                                                                                                                                                                                                                                                                                                                                                                                                                                                                                                                                                                                                                                                                                                                                                                                                                                                                                                                                                                                                                                                                                                        | Level 4                                                                                                                                                                                             | Level 5                                                                                                                                                                          |                                                                                              |         |         |                                                                                                                                                                                                                        |                                                                                                                                                                                                                                   |                                                                                                                                                                                                                                               |                                                                                                                                                                                                     |                                                                                                                                                                                  |                                                                                                                                               |                                                                                              |  |                                                                                                     |                                                                                                                                                               |                                                                                                    |                                                                                     |                                                       |                  |                                                                                                                                                                                                                                                                                                                                                                                                                                                                                                                                                                                                                                                                                                                                                                                                                                                                                                                                                                                                                                                                                                                                                                                                                                                                                                                                                                                                                                                                                                                                                                                                                                                                                                                         |                                                                                      |         |                                                                                                       |         |                   |                                                                                                                                                                                                                                                                                                                                                                                                                                                                                                                                                                                                                                                                                                                                                                                                                                                                                                                                                                                                                                                                                                                                                                                                                                                                                                                                                       |                                                                        |                                                                         |                                                                                                         |                                                                                         |                                                               |                                                                                                                                                                                                                                                                                                                                                                                                                                                                                                                                                                                                                                                                                                                                                                                                                                                                                                                                                                                                                                                                                                                                                                                                                                                                                                                                                                                                                                                                                                                                                                                                                                                                                                                                                                                                                                                                                                                                             |                                                                                                                 |                                                                                |                                                                                                                                             |                                                                               |                                                                                                                         |                                                                         |                                                                                                                            |                                                                                                                                                                 |                                                                                                                                   |                                                                                                      |                                                                                  |                                                                                          |                                                                                          |                                                                                                               |                                                                                                                     |                                                                                                          |                                                                                       |                                                                                   |                                                                                          |                                                                                                 |
| <ul style="list-style-type: none"> <li>Describes basic levels of systems of care (e.g., self-management to societal)</li> <li>Understands the economic challenges of patient care in the health care system</li> </ul> | <ul style="list-style-type: none"> <li>Gives examples of cost and value implications of care he or she provides (e.g., gives examples of alternate sites of care resulting in different costs for individual patients)</li> </ul> | <ul style="list-style-type: none"> <li>Orders and schedules tests in appropriate systems for individual patients balancing expenses and quality</li> <li>Successfully navigates the economic differences of the health care system</li> </ul>                                                                                                                                                                                                                                                                                                                                                                                                                                                                                                                                                                                                                                                                                                                                                                                                                                                                                                                                                                                                                                                                                                                                                                                                                                                                                                  | <ul style="list-style-type: none"> <li>Effectively manages clinic team and schedules for patient and workflow efficiency</li> <li>Uses evidence-based guidelines for cost-effective care</li> </ul> | <ul style="list-style-type: none"> <li>Leads systems change at micro and macro level (e.g., manages operating room [OR] team and patient flow in a multi-case OR day)</li> </ul> |                                                                                              |         |         |                                                                                                                                                                                                                        |                                                                                                                                                                                                                                   |                                                                                                                                                                                                                                               |                                                                                                                                                                                                     |                                                                                                                                                                                  |                                                                                                                                               |                                                                                              |  |                                                                                                     |                                                                                                                                                               |                                                                                                    |                                                                                     |                                                       |                  |                                                                                                                                                                                                                                                                                                                                                                                                                                                                                                                                                                                                                                                                                                                                                                                                                                                                                                                                                                                                                                                                                                                                                                                                                                                                                                                                                                                                                                                                                                                                                                                                                                                                                                                         |                                                                                      |         |                                                                                                       |         |                   |                                                                                                                                                                                                                                                                                                                                                                                                                                                                                                                                                                                                                                                                                                                                                                                                                                                                                                                                                                                                                                                                                                                                                                                                                                                                                                                                                       |                                                                        |                                                                         |                                                                                                         |                                                                                         |                                                               |                                                                                                                                                                                                                                                                                                                                                                                                                                                                                                                                                                                                                                                                                                                                                                                                                                                                                                                                                                                                                                                                                                                                                                                                                                                                                                                                                                                                                                                                                                                                                                                                                                                                                                                                                                                                                                                                                                                                             |                                                                                                                 |                                                                                |                                                                                                                                             |                                                                               |                                                                                                                         |                                                                         |                                                                                                                            |                                                                                                                                                                 |                                                                                                                                   |                                                                                                      |                                                                                  |                                                                                          |                                                                                          |                                                                                                               |                                                                                                                     |                                                                                                          |                                                                                       |                                                                                   |                                                                                          |                                                                                                 |



| <p><b>Orthopaedic Surgery</b></p>                                                                                                                                                       | <p>PS<br/>QI</p>                                                                                                                                                                                                                                                                  | <p><b>Resident will work in interprofessional teams to enhance patient safety and quality care – Systems-based Practice</b></p> <table border="1"> <thead> <tr> <th>Level 1</th> <th>Level 2</th> <th>Level 3</th> <th>Level 4</th> <th>Level 5</th> </tr> </thead> <tbody> <tr> <td> <ul style="list-style-type: none"> <li>Recognizes importance of complete and timely documentation in teamwork and patient safety</li> </ul> </td> <td> <ul style="list-style-type: none"> <li>Uses checklists and briefings to prevent adverse events in health care</li> </ul> </td> <td> <ul style="list-style-type: none"> <li>Participates in quality improvement or patient safety program and/or project</li> </ul> </td> <td> <ul style="list-style-type: none"> <li>Maintains team situational awareness and promote “speaking up” with concerns</li> <li>Incorporates clinical quality improvement and patient safety into clinical practice</li> </ul> </td> <td> <ul style="list-style-type: none"> <li>Develops and publishes quality improvement project results</li> <li>Leads local or regional quality improvement project</li> </ul> </td> </tr> </tbody> </table>                                                                                                                                                                                                                                                                                                                                                                                                                                                                                                                                                                                                                                                                                                                                                                                                                                 | Level 1                                                                                                                                                                                                                     | Level 2                                                                                                                                                                          | Level 3 | Level 4 | Level 5 | <ul style="list-style-type: none"> <li>Recognizes importance of complete and timely documentation in teamwork and patient safety</li> </ul>                                             | <ul style="list-style-type: none"> <li>Uses checklists and briefings to prevent adverse events in health care</li> </ul>                                                                                                                                                          | <ul style="list-style-type: none"> <li>Participates in quality improvement or patient safety program and/or project</li> </ul>                                                                                                                                                                                                                                                                                          | <ul style="list-style-type: none"> <li>Maintains team situational awareness and promote “speaking up” with concerns</li> <li>Incorporates clinical quality improvement and patient safety into clinical practice</li> </ul> | <ul style="list-style-type: none"> <li>Develops and publishes quality improvement project results</li> <li>Leads local or regional quality improvement project</li> </ul>        |                                                                                         |                                                                                                    |                                                                                                                                             |                                                                                                                                 |                                                                                                                            |                                                                                        |                                                                                                                       |                                                                                  |                                                                                                                                 |                                                                                                    |  |  |
|-----------------------------------------------------------------------------------------------------------------------------------------------------------------------------------------|-----------------------------------------------------------------------------------------------------------------------------------------------------------------------------------------------------------------------------------------------------------------------------------|-----------------------------------------------------------------------------------------------------------------------------------------------------------------------------------------------------------------------------------------------------------------------------------------------------------------------------------------------------------------------------------------------------------------------------------------------------------------------------------------------------------------------------------------------------------------------------------------------------------------------------------------------------------------------------------------------------------------------------------------------------------------------------------------------------------------------------------------------------------------------------------------------------------------------------------------------------------------------------------------------------------------------------------------------------------------------------------------------------------------------------------------------------------------------------------------------------------------------------------------------------------------------------------------------------------------------------------------------------------------------------------------------------------------------------------------------------------------------------------------------------------------------------------------------------------------------------------------------------------------------------------------------------------------------------------------------------------------------------------------------------------------------------------------------------------------------------------------------------------------------------------------------------------------------------------------------------------------------------------------------------------|-----------------------------------------------------------------------------------------------------------------------------------------------------------------------------------------------------------------------------|----------------------------------------------------------------------------------------------------------------------------------------------------------------------------------|---------|---------|---------|-----------------------------------------------------------------------------------------------------------------------------------------------------------------------------------------|-----------------------------------------------------------------------------------------------------------------------------------------------------------------------------------------------------------------------------------------------------------------------------------|-------------------------------------------------------------------------------------------------------------------------------------------------------------------------------------------------------------------------------------------------------------------------------------------------------------------------------------------------------------------------------------------------------------------------|-----------------------------------------------------------------------------------------------------------------------------------------------------------------------------------------------------------------------------|----------------------------------------------------------------------------------------------------------------------------------------------------------------------------------|-----------------------------------------------------------------------------------------|----------------------------------------------------------------------------------------------------|---------------------------------------------------------------------------------------------------------------------------------------------|---------------------------------------------------------------------------------------------------------------------------------|----------------------------------------------------------------------------------------------------------------------------|----------------------------------------------------------------------------------------|-----------------------------------------------------------------------------------------------------------------------|----------------------------------------------------------------------------------|---------------------------------------------------------------------------------------------------------------------------------|----------------------------------------------------------------------------------------------------|--|--|
| Level 1                                                                                                                                                                                 | Level 2                                                                                                                                                                                                                                                                           | Level 3                                                                                                                                                                                                                                                                                                                                                                                                                                                                                                                                                                                                                                                                                                                                                                                                                                                                                                                                                                                                                                                                                                                                                                                                                                                                                                                                                                                                                                                                                                                                                                                                                                                                                                                                                                                                                                                                                                                                                                                                   | Level 4                                                                                                                                                                                                                     | Level 5                                                                                                                                                                          |         |         |         |                                                                                                                                                                                         |                                                                                                                                                                                                                                                                                   |                                                                                                                                                                                                                                                                                                                                                                                                                         |                                                                                                                                                                                                                             |                                                                                                                                                                                  |                                                                                         |                                                                                                    |                                                                                                                                             |                                                                                                                                 |                                                                                                                            |                                                                                        |                                                                                                                       |                                                                                  |                                                                                                                                 |                                                                                                    |  |  |
| <ul style="list-style-type: none"> <li>Recognizes importance of complete and timely documentation in teamwork and patient safety</li> </ul>                                             | <ul style="list-style-type: none"> <li>Uses checklists and briefings to prevent adverse events in health care</li> </ul>                                                                                                                                                          | <ul style="list-style-type: none"> <li>Participates in quality improvement or patient safety program and/or project</li> </ul>                                                                                                                                                                                                                                                                                                                                                                                                                                                                                                                                                                                                                                                                                                                                                                                                                                                                                                                                                                                                                                                                                                                                                                                                                                                                                                                                                                                                                                                                                                                                                                                                                                                                                                                                                                                                                                                                            | <ul style="list-style-type: none"> <li>Maintains team situational awareness and promote “speaking up” with concerns</li> <li>Incorporates clinical quality improvement and patient safety into clinical practice</li> </ul> | <ul style="list-style-type: none"> <li>Develops and publishes quality improvement project results</li> <li>Leads local or regional quality improvement project</li> </ul>        |         |         |         |                                                                                                                                                                                         |                                                                                                                                                                                                                                                                                   |                                                                                                                                                                                                                                                                                                                                                                                                                         |                                                                                                                                                                                                                             |                                                                                                                                                                                  |                                                                                         |                                                                                                    |                                                                                                                                             |                                                                                                                                 |                                                                                                                            |                                                                                        |                                                                                                                       |                                                                                  |                                                                                                                                 |                                                                                                    |  |  |
| <p><b>Orthopaedic Surgery</b></p>                                                                                                                                                       | <p>Infor-matics</p>                                                                                                                                                                                                                                                               | <p><b>Uses technology to accomplish safe health care delivery – Systems-based Practice</b></p> <table border="1"> <thead> <tr> <th>Level 1</th> <th>Level 2</th> <th>Level 3</th> <th>Level 4</th> <th>Level 5</th> </tr> </thead> <tbody> <tr> <td> <ul style="list-style-type: none"> <li>Explains the role of the Electronic Health Record (EHR) and Computerized Physician Order Entry (CPOE) in prevention of medical errors</li> </ul> </td> <td> <ul style="list-style-type: none"> <li>Appropriately and accurately enters patient data in EHR</li> <li>Effectively uses electronic medical records in patient care</li> </ul> </td> <td> <ul style="list-style-type: none"> <li>Reconciles conflicting data in the medical record</li> </ul> </td> <td> <ul style="list-style-type: none"> <li>Contributes to reduction of risks of automation and computerized systems by reporting system problems</li> </ul> </td> <td> <ul style="list-style-type: none"> <li>Recommends systems re-design for faculty computerized processes</li> </ul> </td> </tr> </tbody> </table>                                                                                                                                                                                                                                                                                                                                                                                                                                                                                                                                                                                                                                                                                                                                                                                                                                                                                                                       | Level 1                                                                                                                                                                                                                     | Level 2                                                                                                                                                                          | Level 3 | Level 4 | Level 5 | <ul style="list-style-type: none"> <li>Explains the role of the Electronic Health Record (EHR) and Computerized Physician Order Entry (CPOE) in prevention of medical errors</li> </ul> | <ul style="list-style-type: none"> <li>Appropriately and accurately enters patient data in EHR</li> <li>Effectively uses electronic medical records in patient care</li> </ul>                                                                                                    | <ul style="list-style-type: none"> <li>Reconciles conflicting data in the medical record</li> </ul>                                                                                                                                                                                                                                                                                                                     | <ul style="list-style-type: none"> <li>Contributes to reduction of risks of automation and computerized systems by reporting system problems</li> </ul>                                                                     | <ul style="list-style-type: none"> <li>Recommends systems re-design for faculty computerized processes</li> </ul>                                                                |                                                                                         |                                                                                                    |                                                                                                                                             |                                                                                                                                 |                                                                                                                            |                                                                                        |                                                                                                                       |                                                                                  |                                                                                                                                 |                                                                                                    |  |  |
| Level 1                                                                                                                                                                                 | Level 2                                                                                                                                                                                                                                                                           | Level 3                                                                                                                                                                                                                                                                                                                                                                                                                                                                                                                                                                                                                                                                                                                                                                                                                                                                                                                                                                                                                                                                                                                                                                                                                                                                                                                                                                                                                                                                                                                                                                                                                                                                                                                                                                                                                                                                                                                                                                                                   | Level 4                                                                                                                                                                                                                     | Level 5                                                                                                                                                                          |         |         |         |                                                                                                                                                                                         |                                                                                                                                                                                                                                                                                   |                                                                                                                                                                                                                                                                                                                                                                                                                         |                                                                                                                                                                                                                             |                                                                                                                                                                                  |                                                                                         |                                                                                                    |                                                                                                                                             |                                                                                                                                 |                                                                                                                            |                                                                                        |                                                                                                                       |                                                                                  |                                                                                                                                 |                                                                                                    |  |  |
| <ul style="list-style-type: none"> <li>Explains the role of the Electronic Health Record (EHR) and Computerized Physician Order Entry (CPOE) in prevention of medical errors</li> </ul> | <ul style="list-style-type: none"> <li>Appropriately and accurately enters patient data in EHR</li> <li>Effectively uses electronic medical records in patient care</li> </ul>                                                                                                    | <ul style="list-style-type: none"> <li>Reconciles conflicting data in the medical record</li> </ul>                                                                                                                                                                                                                                                                                                                                                                                                                                                                                                                                                                                                                                                                                                                                                                                                                                                                                                                                                                                                                                                                                                                                                                                                                                                                                                                                                                                                                                                                                                                                                                                                                                                                                                                                                                                                                                                                                                       | <ul style="list-style-type: none"> <li>Contributes to reduction of risks of automation and computerized systems by reporting system problems</li> </ul>                                                                     | <ul style="list-style-type: none"> <li>Recommends systems re-design for faculty computerized processes</li> </ul>                                                                |         |         |         |                                                                                                                                                                                         |                                                                                                                                                                                                                                                                                   |                                                                                                                                                                                                                                                                                                                                                                                                                         |                                                                                                                                                                                                                             |                                                                                                                                                                                  |                                                                                         |                                                                                                    |                                                                                                                                             |                                                                                                                                 |                                                                                                                            |                                                                                        |                                                                                                                       |                                                                                  |                                                                                                                                 |                                                                                                    |  |  |
| <p><b>Otolaryngology</b></p>                                                                                                                                                            | <p>PS</p>                                                                                                                                                                                                                                                                         | <p><b>Patient Safety – Systems-based Practice</b></p> <table border="1"> <thead> <tr> <th>Level 1</th> <th>Level 2</th> <th>Level 3</th> <th>Level 4</th> <th>Level 5</th> </tr> </thead> <tbody> <tr> <td> <ul style="list-style-type: none"> <li>Understands the need for formal patient safety measures (e.g., surgical time out)</li> </ul> </td> <td> <ul style="list-style-type: none"> <li>Participates in the use of tools to prevent adverse events (e.g., checklists and briefings)</li> <li>Understands and uses chain of command to develop and implement patient care plans (junior to senior resident to attending)</li> </ul> </td> <td> <ul style="list-style-type: none"> <li>Consistently uses tools to prevent adverse events (e.g., checklists and briefings)</li> <li>Identifies potential patient safety issues (patient positioning in OR, aspiration risk) and means to prevent those problems</li> <li>Presents at morbidity and mortality (M&amp;M) conference (organizes data and identification of some pertinent patient safety issues)</li> </ul> </td> <td> <ul style="list-style-type: none"> <li>Advocates for quality patient care and optimal patient care systems</li> <li>Analyzes M&amp;M findings and provides feedback to improve patient safety</li> </ul> </td> <td> <ul style="list-style-type: none"> <li>Educates other services re patient safety issues in otolaryngology head and neck surgery OHNS</li> </ul> </td> </tr> </tbody> </table>                                                                                                                                                                                                                                                                                                                                                                                                                                                                                                              | Level 1                                                                                                                                                                                                                     | Level 2                                                                                                                                                                          | Level 3 | Level 4 | Level 5 | <ul style="list-style-type: none"> <li>Understands the need for formal patient safety measures (e.g., surgical time out)</li> </ul>                                                     | <ul style="list-style-type: none"> <li>Participates in the use of tools to prevent adverse events (e.g., checklists and briefings)</li> <li>Understands and uses chain of command to develop and implement patient care plans (junior to senior resident to attending)</li> </ul> | <ul style="list-style-type: none"> <li>Consistently uses tools to prevent adverse events (e.g., checklists and briefings)</li> <li>Identifies potential patient safety issues (patient positioning in OR, aspiration risk) and means to prevent those problems</li> <li>Presents at morbidity and mortality (M&amp;M) conference (organizes data and identification of some pertinent patient safety issues)</li> </ul> | <ul style="list-style-type: none"> <li>Advocates for quality patient care and optimal patient care systems</li> <li>Analyzes M&amp;M findings and provides feedback to improve patient safety</li> </ul>                    | <ul style="list-style-type: none"> <li>Educates other services re patient safety issues in otolaryngology head and neck surgery OHNS</li> </ul>                                  |                                                                                         |                                                                                                    |                                                                                                                                             |                                                                                                                                 |                                                                                                                            |                                                                                        |                                                                                                                       |                                                                                  |                                                                                                                                 |                                                                                                    |  |  |
| Level 1                                                                                                                                                                                 | Level 2                                                                                                                                                                                                                                                                           | Level 3                                                                                                                                                                                                                                                                                                                                                                                                                                                                                                                                                                                                                                                                                                                                                                                                                                                                                                                                                                                                                                                                                                                                                                                                                                                                                                                                                                                                                                                                                                                                                                                                                                                                                                                                                                                                                                                                                                                                                                                                   | Level 4                                                                                                                                                                                                                     | Level 5                                                                                                                                                                          |         |         |         |                                                                                                                                                                                         |                                                                                                                                                                                                                                                                                   |                                                                                                                                                                                                                                                                                                                                                                                                                         |                                                                                                                                                                                                                             |                                                                                                                                                                                  |                                                                                         |                                                                                                    |                                                                                                                                             |                                                                                                                                 |                                                                                                                            |                                                                                        |                                                                                                                       |                                                                                  |                                                                                                                                 |                                                                                                    |  |  |
| <ul style="list-style-type: none"> <li>Understands the need for formal patient safety measures (e.g., surgical time out)</li> </ul>                                                     | <ul style="list-style-type: none"> <li>Participates in the use of tools to prevent adverse events (e.g., checklists and briefings)</li> <li>Understands and uses chain of command to develop and implement patient care plans (junior to senior resident to attending)</li> </ul> | <ul style="list-style-type: none"> <li>Consistently uses tools to prevent adverse events (e.g., checklists and briefings)</li> <li>Identifies potential patient safety issues (patient positioning in OR, aspiration risk) and means to prevent those problems</li> <li>Presents at morbidity and mortality (M&amp;M) conference (organizes data and identification of some pertinent patient safety issues)</li> </ul>                                                                                                                                                                                                                                                                                                                                                                                                                                                                                                                                                                                                                                                                                                                                                                                                                                                                                                                                                                                                                                                                                                                                                                                                                                                                                                                                                                                                                                                                                                                                                                                   | <ul style="list-style-type: none"> <li>Advocates for quality patient care and optimal patient care systems</li> <li>Analyzes M&amp;M findings and provides feedback to improve patient safety</li> </ul>                    | <ul style="list-style-type: none"> <li>Educates other services re patient safety issues in otolaryngology head and neck surgery OHNS</li> </ul>                                  |         |         |         |                                                                                                                                                                                         |                                                                                                                                                                                                                                                                                   |                                                                                                                                                                                                                                                                                                                                                                                                                         |                                                                                                                                                                                                                             |                                                                                                                                                                                  |                                                                                         |                                                                                                    |                                                                                                                                             |                                                                                                                                 |                                                                                                                            |                                                                                        |                                                                                                                       |                                                                                  |                                                                                                                                 |                                                                                                    |  |  |
| <p><b>Otolaryngology</b></p>                                                                                                                                                            | <p>Resources<br/>HC Costs</p>                                                                                                                                                                                                                                                     | <p><b>Resource Utilization – Systems-based Practice</b></p> <table border="1"> <thead> <tr> <th>Level 1</th> <th>Level 2</th> <th>Level 3</th> <th>Level 4</th> <th>Level 5</th> </tr> </thead> <tbody> <tr> <td> <ul style="list-style-type: none"> <li>Uses resources (social work, patient care manager) to coordinate patient care</li> </ul> </td> <td> <ul style="list-style-type: none"> <li>Actively functions as part of an inter-disciplinary team to care for patients</li> <li>Aware of socio-economic issues in patient care and takes those into consideration when developing patient care plans</li> </ul> </td> <td> <ul style="list-style-type: none"> <li>Incorporates cost issues into care decisions</li> <li>Contributes to leadership of the interdisciplinary care team</li> <li>Uses technology and other hospital/clinic resources in patient care</li> </ul> </td> <td> <ul style="list-style-type: none"> <li>Practices cost-effective care (e.g., managing length of stay, operative efficiency)</li> <li>Leads interdisciplinary team in patient care</li> </ul> </td> <td> <ul style="list-style-type: none"> <li>Designs measurement tools to monitor and provide feedback to providers/teams on resource consumption to facilitate improvement</li> </ul> </td> </tr> </tbody> </table>                                                                                                                                                                                                                                                                                                                                                                                                                                                                                                                                                                                                                                                                                  | Level 1                                                                                                                                                                                                                     | Level 2                                                                                                                                                                          | Level 3 | Level 4 | Level 5 | <ul style="list-style-type: none"> <li>Uses resources (social work, patient care manager) to coordinate patient care</li> </ul>                                                         | <ul style="list-style-type: none"> <li>Actively functions as part of an inter-disciplinary team to care for patients</li> <li>Aware of socio-economic issues in patient care and takes those into consideration when developing patient care plans</li> </ul>                     | <ul style="list-style-type: none"> <li>Incorporates cost issues into care decisions</li> <li>Contributes to leadership of the interdisciplinary care team</li> <li>Uses technology and other hospital/clinic resources in patient care</li> </ul>                                                                                                                                                                       | <ul style="list-style-type: none"> <li>Practices cost-effective care (e.g., managing length of stay, operative efficiency)</li> <li>Leads interdisciplinary team in patient care</li> </ul>                                 | <ul style="list-style-type: none"> <li>Designs measurement tools to monitor and provide feedback to providers/teams on resource consumption to facilitate improvement</li> </ul> |                                                                                         |                                                                                                    |                                                                                                                                             |                                                                                                                                 |                                                                                                                            |                                                                                        |                                                                                                                       |                                                                                  |                                                                                                                                 |                                                                                                    |  |  |
| Level 1                                                                                                                                                                                 | Level 2                                                                                                                                                                                                                                                                           | Level 3                                                                                                                                                                                                                                                                                                                                                                                                                                                                                                                                                                                                                                                                                                                                                                                                                                                                                                                                                                                                                                                                                                                                                                                                                                                                                                                                                                                                                                                                                                                                                                                                                                                                                                                                                                                                                                                                                                                                                                                                   | Level 4                                                                                                                                                                                                                     | Level 5                                                                                                                                                                          |         |         |         |                                                                                                                                                                                         |                                                                                                                                                                                                                                                                                   |                                                                                                                                                                                                                                                                                                                                                                                                                         |                                                                                                                                                                                                                             |                                                                                                                                                                                  |                                                                                         |                                                                                                    |                                                                                                                                             |                                                                                                                                 |                                                                                                                            |                                                                                        |                                                                                                                       |                                                                                  |                                                                                                                                 |                                                                                                    |  |  |
| <ul style="list-style-type: none"> <li>Uses resources (social work, patient care manager) to coordinate patient care</li> </ul>                                                         | <ul style="list-style-type: none"> <li>Actively functions as part of an inter-disciplinary team to care for patients</li> <li>Aware of socio-economic issues in patient care and takes those into consideration when developing patient care plans</li> </ul>                     | <ul style="list-style-type: none"> <li>Incorporates cost issues into care decisions</li> <li>Contributes to leadership of the interdisciplinary care team</li> <li>Uses technology and other hospital/clinic resources in patient care</li> </ul>                                                                                                                                                                                                                                                                                                                                                                                                                                                                                                                                                                                                                                                                                                                                                                                                                                                                                                                                                                                                                                                                                                                                                                                                                                                                                                                                                                                                                                                                                                                                                                                                                                                                                                                                                         | <ul style="list-style-type: none"> <li>Practices cost-effective care (e.g., managing length of stay, operative efficiency)</li> <li>Leads interdisciplinary team in patient care</li> </ul>                                 | <ul style="list-style-type: none"> <li>Designs measurement tools to monitor and provide feedback to providers/teams on resource consumption to facilitate improvement</li> </ul> |         |         |         |                                                                                                                                                                                         |                                                                                                                                                                                                                                                                                   |                                                                                                                                                                                                                                                                                                                                                                                                                         |                                                                                                                                                                                                                             |                                                                                                                                                                                  |                                                                                         |                                                                                                    |                                                                                                                                             |                                                                                                                                 |                                                                                                                            |                                                                                        |                                                                                                                       |                                                                                  |                                                                                                                                 |                                                                                                    |  |  |
| <p><b>Pathology</b></p>                                                                                                                                                                 | <p>PS<br/>QI</p>                                                                                                                                                                                                                                                                  | <p><b>Systems-Based Practice 1: Patient Safety and Quality Improvement (QI) (AP/CP)</b></p> <table border="1"> <thead> <tr> <th>Level 1</th> <th>Level 2</th> <th>Level 3</th> <th>Level 4</th> <th>Level 5</th> </tr> </thead> <tbody> <tr> <td> <p>Demonstrates knowledge of common patient safety events</p> </td> <td> <p>Identifies system factors that lead to patient safety events</p> </td> <td> <p>Participates in analysis of patient safety events (simulated or actual)</p> </td> <td> <p>Conducts analysis of patient safety events and offers error prevention strategies (simulated or actual)</p> </td> <td> <p>Actively engages teams and processes to modify systems to prevent patient safety events</p> </td> </tr> <tr> <td> <p>Demonstrates knowledge of how to report patient safety events</p> </td> <td> <p>Reports patient safety events through institutional reporting systems (simulated or actual)</p> </td> <td> <p>Participates in disclosure of patient safety events to clinicians and/or patients and families, as appropriate (simulated or actual)</p> </td> <td> <p>Discloses patient safety events to clinicians and families, as appropriate (simulated or actual)</p> </td> <td> <p>Role models or mentors others in the disclosure of patient safety events</p> </td> </tr> <tr> <td> <p>Demonstrates knowledge of basic QI methodologies and metrics</p> </td> <td> <p>Describes departmental and institutional QI initiatives</p> </td> <td> <p>Participates in departmental and institutional QI initiatives</p> </td> <td> <p>Demonstrates the skills required to identify, develop, implement, and analyze a QI project</p> </td> <td> <p>Creates, implements, and assesses QI initiatives at the institutional or community level</p> </td> </tr> </tbody> </table>                                                                                                                                                                                      | Level 1                                                                                                                                                                                                                     | Level 2                                                                                                                                                                          | Level 3 | Level 4 | Level 5 | <p>Demonstrates knowledge of common patient safety events</p>                                                                                                                           | <p>Identifies system factors that lead to patient safety events</p>                                                                                                                                                                                                               | <p>Participates in analysis of patient safety events (simulated or actual)</p>                                                                                                                                                                                                                                                                                                                                          | <p>Conducts analysis of patient safety events and offers error prevention strategies (simulated or actual)</p>                                                                                                              | <p>Actively engages teams and processes to modify systems to prevent patient safety events</p>                                                                                   | <p>Demonstrates knowledge of how to report patient safety events</p>                    | <p>Reports patient safety events through institutional reporting systems (simulated or actual)</p> | <p>Participates in disclosure of patient safety events to clinicians and/or patients and families, as appropriate (simulated or actual)</p> | <p>Discloses patient safety events to clinicians and families, as appropriate (simulated or actual)</p>                         | <p>Role models or mentors others in the disclosure of patient safety events</p>                                            | <p>Demonstrates knowledge of basic QI methodologies and metrics</p>                    | <p>Describes departmental and institutional QI initiatives</p>                                                        | <p>Participates in departmental and institutional QI initiatives</p>             | <p>Demonstrates the skills required to identify, develop, implement, and analyze a QI project</p>                               | <p>Creates, implements, and assesses QI initiatives at the institutional or community level</p>    |  |  |
| Level 1                                                                                                                                                                                 | Level 2                                                                                                                                                                                                                                                                           | Level 3                                                                                                                                                                                                                                                                                                                                                                                                                                                                                                                                                                                                                                                                                                                                                                                                                                                                                                                                                                                                                                                                                                                                                                                                                                                                                                                                                                                                                                                                                                                                                                                                                                                                                                                                                                                                                                                                                                                                                                                                   | Level 4                                                                                                                                                                                                                     | Level 5                                                                                                                                                                          |         |         |         |                                                                                                                                                                                         |                                                                                                                                                                                                                                                                                   |                                                                                                                                                                                                                                                                                                                                                                                                                         |                                                                                                                                                                                                                             |                                                                                                                                                                                  |                                                                                         |                                                                                                    |                                                                                                                                             |                                                                                                                                 |                                                                                                                            |                                                                                        |                                                                                                                       |                                                                                  |                                                                                                                                 |                                                                                                    |  |  |
| <p>Demonstrates knowledge of common patient safety events</p>                                                                                                                           | <p>Identifies system factors that lead to patient safety events</p>                                                                                                                                                                                                               | <p>Participates in analysis of patient safety events (simulated or actual)</p>                                                                                                                                                                                                                                                                                                                                                                                                                                                                                                                                                                                                                                                                                                                                                                                                                                                                                                                                                                                                                                                                                                                                                                                                                                                                                                                                                                                                                                                                                                                                                                                                                                                                                                                                                                                                                                                                                                                            | <p>Conducts analysis of patient safety events and offers error prevention strategies (simulated or actual)</p>                                                                                                              | <p>Actively engages teams and processes to modify systems to prevent patient safety events</p>                                                                                   |         |         |         |                                                                                                                                                                                         |                                                                                                                                                                                                                                                                                   |                                                                                                                                                                                                                                                                                                                                                                                                                         |                                                                                                                                                                                                                             |                                                                                                                                                                                  |                                                                                         |                                                                                                    |                                                                                                                                             |                                                                                                                                 |                                                                                                                            |                                                                                        |                                                                                                                       |                                                                                  |                                                                                                                                 |                                                                                                    |  |  |
| <p>Demonstrates knowledge of how to report patient safety events</p>                                                                                                                    | <p>Reports patient safety events through institutional reporting systems (simulated or actual)</p>                                                                                                                                                                                | <p>Participates in disclosure of patient safety events to clinicians and/or patients and families, as appropriate (simulated or actual)</p>                                                                                                                                                                                                                                                                                                                                                                                                                                                                                                                                                                                                                                                                                                                                                                                                                                                                                                                                                                                                                                                                                                                                                                                                                                                                                                                                                                                                                                                                                                                                                                                                                                                                                                                                                                                                                                                               | <p>Discloses patient safety events to clinicians and families, as appropriate (simulated or actual)</p>                                                                                                                     | <p>Role models or mentors others in the disclosure of patient safety events</p>                                                                                                  |         |         |         |                                                                                                                                                                                         |                                                                                                                                                                                                                                                                                   |                                                                                                                                                                                                                                                                                                                                                                                                                         |                                                                                                                                                                                                                             |                                                                                                                                                                                  |                                                                                         |                                                                                                    |                                                                                                                                             |                                                                                                                                 |                                                                                                                            |                                                                                        |                                                                                                                       |                                                                                  |                                                                                                                                 |                                                                                                    |  |  |
| <p>Demonstrates knowledge of basic QI methodologies and metrics</p>                                                                                                                     | <p>Describes departmental and institutional QI initiatives</p>                                                                                                                                                                                                                    | <p>Participates in departmental and institutional QI initiatives</p>                                                                                                                                                                                                                                                                                                                                                                                                                                                                                                                                                                                                                                                                                                                                                                                                                                                                                                                                                                                                                                                                                                                                                                                                                                                                                                                                                                                                                                                                                                                                                                                                                                                                                                                                                                                                                                                                                                                                      | <p>Demonstrates the skills required to identify, develop, implement, and analyze a QI project</p>                                                                                                                           | <p>Creates, implements, and assesses QI initiatives at the institutional or community level</p>                                                                                  |         |         |         |                                                                                                                                                                                         |                                                                                                                                                                                                                                                                                   |                                                                                                                                                                                                                                                                                                                                                                                                                         |                                                                                                                                                                                                                             |                                                                                                                                                                                  |                                                                                         |                                                                                                    |                                                                                                                                             |                                                                                                                                 |                                                                                                                            |                                                                                        |                                                                                                                       |                                                                                  |                                                                                                                                 |                                                                                                    |  |  |
| <p><b>Pathology</b></p>                                                                                                                                                                 | <p>CC</p>                                                                                                                                                                                                                                                                         | <p><b>Systems-Based Practice 2: Systems Navigation for Patient-Centered Care (AP/CP)</b></p> <table border="1"> <thead> <tr> <th>Level 1</th> <th>Level 2</th> <th>Level 3</th> <th>Level 4</th> <th>Level 5</th> </tr> </thead> <tbody> <tr> <td> <p>Demonstrates knowledge of case coordination</p> </td> <td> <p>Coordinates care of patients in routine cases effectively using interprofessional teams</p> </td> <td> <p>Coordinates care of patients in complex cases effectively using interprofessional teams</p> </td> <td> <p>Models effective coordination of patient-centered care among different disciplines and specialties</p> </td> <td> <p>Analyses the process of care coordination and leads in the design and implementation of improvements</p> </td> </tr> <tr> <td> <p>Identifies key elements for safe and effective transitions of care and hand-offs</p> </td> <td> <p>Performs safe and effective transitions of care/hand-offs in routine situations</p> </td> <td> <p>Performs safe and effective transitions of care/hand-offs in complex situations</p> </td> <td> <p>Models and advocates for safe and effective transitions of care/hand-offs within and across health care delivery systems</p> </td> <td> <p>Improves quality of transitions of care within and across health care delivery systems to optimize patient outcomes</p> </td> </tr> <tr> <td> <p>Demonstrates knowledge of population and community health needs and disparities</p> </td> <td> <p>Identifies pathology’s role in population and community health needs and inequities for their local population</p> </td> <td> <p>Identifies opportunities for pathology to participate in community health</p> </td> <td> <p>Recommends and/or participates in changing and adapting practice to provide for the needs of communities and populations</p> </td> <td> <p>Leads innovations and advocates for populations and communities with health care inequities</p> </td> </tr> </tbody> </table> | Level 1                                                                                                                                                                                                                     | Level 2                                                                                                                                                                          | Level 3 | Level 4 | Level 5 | <p>Demonstrates knowledge of case coordination</p>                                                                                                                                      | <p>Coordinates care of patients in routine cases effectively using interprofessional teams</p>                                                                                                                                                                                    | <p>Coordinates care of patients in complex cases effectively using interprofessional teams</p>                                                                                                                                                                                                                                                                                                                          | <p>Models effective coordination of patient-centered care among different disciplines and specialties</p>                                                                                                                   | <p>Analyses the process of care coordination and leads in the design and implementation of improvements</p>                                                                      | <p>Identifies key elements for safe and effective transitions of care and hand-offs</p> | <p>Performs safe and effective transitions of care/hand-offs in routine situations</p>             | <p>Performs safe and effective transitions of care/hand-offs in complex situations</p>                                                      | <p>Models and advocates for safe and effective transitions of care/hand-offs within and across health care delivery systems</p> | <p>Improves quality of transitions of care within and across health care delivery systems to optimize patient outcomes</p> | <p>Demonstrates knowledge of population and community health needs and disparities</p> | <p>Identifies pathology’s role in population and community health needs and inequities for their local population</p> | <p>Identifies opportunities for pathology to participate in community health</p> | <p>Recommends and/or participates in changing and adapting practice to provide for the needs of communities and populations</p> | <p>Leads innovations and advocates for populations and communities with health care inequities</p> |  |  |
| Level 1                                                                                                                                                                                 | Level 2                                                                                                                                                                                                                                                                           | Level 3                                                                                                                                                                                                                                                                                                                                                                                                                                                                                                                                                                                                                                                                                                                                                                                                                                                                                                                                                                                                                                                                                                                                                                                                                                                                                                                                                                                                                                                                                                                                                                                                                                                                                                                                                                                                                                                                                                                                                                                                   | Level 4                                                                                                                                                                                                                     | Level 5                                                                                                                                                                          |         |         |         |                                                                                                                                                                                         |                                                                                                                                                                                                                                                                                   |                                                                                                                                                                                                                                                                                                                                                                                                                         |                                                                                                                                                                                                                             |                                                                                                                                                                                  |                                                                                         |                                                                                                    |                                                                                                                                             |                                                                                                                                 |                                                                                                                            |                                                                                        |                                                                                                                       |                                                                                  |                                                                                                                                 |                                                                                                    |  |  |
| <p>Demonstrates knowledge of case coordination</p>                                                                                                                                      | <p>Coordinates care of patients in routine cases effectively using interprofessional teams</p>                                                                                                                                                                                    | <p>Coordinates care of patients in complex cases effectively using interprofessional teams</p>                                                                                                                                                                                                                                                                                                                                                                                                                                                                                                                                                                                                                                                                                                                                                                                                                                                                                                                                                                                                                                                                                                                                                                                                                                                                                                                                                                                                                                                                                                                                                                                                                                                                                                                                                                                                                                                                                                            | <p>Models effective coordination of patient-centered care among different disciplines and specialties</p>                                                                                                                   | <p>Analyses the process of care coordination and leads in the design and implementation of improvements</p>                                                                      |         |         |         |                                                                                                                                                                                         |                                                                                                                                                                                                                                                                                   |                                                                                                                                                                                                                                                                                                                                                                                                                         |                                                                                                                                                                                                                             |                                                                                                                                                                                  |                                                                                         |                                                                                                    |                                                                                                                                             |                                                                                                                                 |                                                                                                                            |                                                                                        |                                                                                                                       |                                                                                  |                                                                                                                                 |                                                                                                    |  |  |
| <p>Identifies key elements for safe and effective transitions of care and hand-offs</p>                                                                                                 | <p>Performs safe and effective transitions of care/hand-offs in routine situations</p>                                                                                                                                                                                            | <p>Performs safe and effective transitions of care/hand-offs in complex situations</p>                                                                                                                                                                                                                                                                                                                                                                                                                                                                                                                                                                                                                                                                                                                                                                                                                                                                                                                                                                                                                                                                                                                                                                                                                                                                                                                                                                                                                                                                                                                                                                                                                                                                                                                                                                                                                                                                                                                    | <p>Models and advocates for safe and effective transitions of care/hand-offs within and across health care delivery systems</p>                                                                                             | <p>Improves quality of transitions of care within and across health care delivery systems to optimize patient outcomes</p>                                                       |         |         |         |                                                                                                                                                                                         |                                                                                                                                                                                                                                                                                   |                                                                                                                                                                                                                                                                                                                                                                                                                         |                                                                                                                                                                                                                             |                                                                                                                                                                                  |                                                                                         |                                                                                                    |                                                                                                                                             |                                                                                                                                 |                                                                                                                            |                                                                                        |                                                                                                                       |                                                                                  |                                                                                                                                 |                                                                                                    |  |  |
| <p>Demonstrates knowledge of population and community health needs and disparities</p>                                                                                                  | <p>Identifies pathology’s role in population and community health needs and inequities for their local population</p>                                                                                                                                                             | <p>Identifies opportunities for pathology to participate in community health</p>                                                                                                                                                                                                                                                                                                                                                                                                                                                                                                                                                                                                                                                                                                                                                                                                                                                                                                                                                                                                                                                                                                                                                                                                                                                                                                                                                                                                                                                                                                                                                                                                                                                                                                                                                                                                                                                                                                                          | <p>Recommends and/or participates in changing and adapting practice to provide for the needs of communities and populations</p>                                                                                             | <p>Leads innovations and advocates for populations and communities with health care inequities</p>                                                                               |         |         |         |                                                                                                                                                                                         |                                                                                                                                                                                                                                                                                   |                                                                                                                                                                                                                                                                                                                                                                                                                         |                                                                                                                                                                                                                             |                                                                                                                                                                                  |                                                                                         |                                                                                                    |                                                                                                                                             |                                                                                                                                 |                                                                                                                            |                                                                                        |                                                                                                                       |                                                                                  |                                                                                                                                 |                                                                                                    |  |  |

| <b>Pathology</b>                                                                                                                                | HC Systems                                                                                                                                                                                                                                                                                                                                                                                                                                                                                                                          | <table border="1"> <thead> <tr> <th colspan="5">Systems-Based Practice 3: Physician Role in Health Care System (AP/CP)</th> </tr> <tr> <th>Level 1</th> <th>Level 2</th> <th>Level 3</th> <th>Level 4</th> <th>Level 5</th> </tr> </thead> <tbody> <tr> <td>Identifies key components of the complex health care system (e.g., hospital, skilled nursing facility, finance, personnel, technology)</td> <td>Describes how components of a complex health care system are inter-related, and how this impacts patient care</td> <td>Discusses how individual practice affects the broader system (e.g., test utilization, turnaround time)</td> <td>Manages various components of the complex health care system to provide efficient and effective patient care and transition of care</td> <td>Advocates for or leads systems change that enhances high-value, efficient, and effective patient care and transition of care</td> </tr> <tr> <td>Describes basic health payment systems (e.g., government, private, public, uninsured care) and practice models</td> <td>Documents testing detail and explains the impact of documentation on billing and reimbursement</td> <td>Engages with clinicians and/or patients in shared-decision making, such as use of preauthorization for complex testing</td> <td>Practices and advocates for cost effective patient care with consideration of the limitations of each patient's payment model</td> <td>Participates in health policy advocacy activities</td> </tr> </tbody> </table>                                                                                                                                                                                                                                                                                                                                                                                                                                                                                                                                                                                                                                                                                                                                                                                                                                                                                                                                                                                                                                                                                                                                                                                                                                                                                                                                                                                                                                                                                                                                                                                                                                                                                                                                                                                                                                                                                                                                                                | Systems-Based Practice 3: Physician Role in Health Care System (AP/CP)                                                                                                                                                                                                                                                                                                                                                                                                                                                                                                                                                                                                                                                |                                                                                                                                                                                                                                                                                                                                                                                                                                                                                                                                                                                                                                                                                                                                                                                                                                                                                                                                                              |                                                                                                                                                                                                 |  |  | Level 1 | Level 2            | Level 3 | Level 4 | Level 5 | Identifies key components of the complex health care system (e.g., hospital, skilled nursing facility, finance, personnel, technology)          | Describes how components of a complex health care system are inter-related, and how this impacts patient care                                                                                 | Discusses how individual practice affects the broader system (e.g., test utilization, turnaround time)                                                                                                               | Manages various components of the complex health care system to provide efficient and effective patient care and transition of care                                                                                                                                                                                                                                                                                                                                                                                                 | Advocates for or leads systems change that enhances high-value, efficient, and effective patient care and transition of care                                                                                                                                                                                                                                                                                                                                                                                                                                                                                                                                                      | Describes basic health payment systems (e.g., government, private, public, uninsured care) and practice models                                                                                                                                                                                                                                                                                                                                                                                                                                                                                                                                                                                                        | Documents testing detail and explains the impact of documentation on billing and reimbursement                                                                                                                                                                                                                                                                                                                                                                                                                                                                                                                                                                                                                                                                                                                                                                                                                                                               | Engages with clinicians and/or patients in shared-decision making, such as use of preauthorization for complex testing                                                                          | Practices and advocates for cost effective patient care with consideration of the limitations of each patient's payment model                                                               | Participates in health policy advocacy activities                                                                         |  |  |
|-------------------------------------------------------------------------------------------------------------------------------------------------|-------------------------------------------------------------------------------------------------------------------------------------------------------------------------------------------------------------------------------------------------------------------------------------------------------------------------------------------------------------------------------------------------------------------------------------------------------------------------------------------------------------------------------------|-------------------------------------------------------------------------------------------------------------------------------------------------------------------------------------------------------------------------------------------------------------------------------------------------------------------------------------------------------------------------------------------------------------------------------------------------------------------------------------------------------------------------------------------------------------------------------------------------------------------------------------------------------------------------------------------------------------------------------------------------------------------------------------------------------------------------------------------------------------------------------------------------------------------------------------------------------------------------------------------------------------------------------------------------------------------------------------------------------------------------------------------------------------------------------------------------------------------------------------------------------------------------------------------------------------------------------------------------------------------------------------------------------------------------------------------------------------------------------------------------------------------------------------------------------------------------------------------------------------------------------------------------------------------------------------------------------------------------------------------------------------------------------------------------------------------------------------------------------------------------------------------------------------------------------------------------------------------------------------------------------------------------------------------------------------------------------------------------------------------------------------------------------------------------------------------------------------------------------------------------------------------------------------------------------------------------------------------------------------------------------------------------------------------------------------------------------------------------------------------------------------------------------------------------------------------------------------------------------------------------------------------------------------------------------------------------------------------------------------------------------------------------------------------------------------------------------------------------------------------------------------------------------------------------------------------------------------------------------------------------------------------------------------------------------------------------------------------------------------------------------------------------------------------------------------------------------------------------------------------------------------------------------------------------------------------------------------------------------------------------------------------------------------------------------------------------------------------------------------------------------|-----------------------------------------------------------------------------------------------------------------------------------------------------------------------------------------------------------------------------------------------------------------------------------------------------------------------------------------------------------------------------------------------------------------------------------------------------------------------------------------------------------------------------------------------------------------------------------------------------------------------------------------------------------------------------------------------------------------------|--------------------------------------------------------------------------------------------------------------------------------------------------------------------------------------------------------------------------------------------------------------------------------------------------------------------------------------------------------------------------------------------------------------------------------------------------------------------------------------------------------------------------------------------------------------------------------------------------------------------------------------------------------------------------------------------------------------------------------------------------------------------------------------------------------------------------------------------------------------------------------------------------------------------------------------------------------------|-------------------------------------------------------------------------------------------------------------------------------------------------------------------------------------------------|--|--|---------|--------------------|---------|---------|---------|-------------------------------------------------------------------------------------------------------------------------------------------------|-----------------------------------------------------------------------------------------------------------------------------------------------------------------------------------------------|----------------------------------------------------------------------------------------------------------------------------------------------------------------------------------------------------------------------|-------------------------------------------------------------------------------------------------------------------------------------------------------------------------------------------------------------------------------------------------------------------------------------------------------------------------------------------------------------------------------------------------------------------------------------------------------------------------------------------------------------------------------------|-----------------------------------------------------------------------------------------------------------------------------------------------------------------------------------------------------------------------------------------------------------------------------------------------------------------------------------------------------------------------------------------------------------------------------------------------------------------------------------------------------------------------------------------------------------------------------------------------------------------------------------------------------------------------------------|-----------------------------------------------------------------------------------------------------------------------------------------------------------------------------------------------------------------------------------------------------------------------------------------------------------------------------------------------------------------------------------------------------------------------------------------------------------------------------------------------------------------------------------------------------------------------------------------------------------------------------------------------------------------------------------------------------------------------|--------------------------------------------------------------------------------------------------------------------------------------------------------------------------------------------------------------------------------------------------------------------------------------------------------------------------------------------------------------------------------------------------------------------------------------------------------------------------------------------------------------------------------------------------------------------------------------------------------------------------------------------------------------------------------------------------------------------------------------------------------------------------------------------------------------------------------------------------------------------------------------------------------------------------------------------------------------|-------------------------------------------------------------------------------------------------------------------------------------------------------------------------------------------------|---------------------------------------------------------------------------------------------------------------------------------------------------------------------------------------------|---------------------------------------------------------------------------------------------------------------------------|--|--|
| Systems-Based Practice 3: Physician Role in Health Care System (AP/CP)                                                                          |                                                                                                                                                                                                                                                                                                                                                                                                                                                                                                                                     |                                                                                                                                                                                                                                                                                                                                                                                                                                                                                                                                                                                                                                                                                                                                                                                                                                                                                                                                                                                                                                                                                                                                                                                                                                                                                                                                                                                                                                                                                                                                                                                                                                                                                                                                                                                                                                                                                                                                                                                                                                                                                                                                                                                                                                                                                                                                                                                                                                                                                                                                                                                                                                                                                                                                                                                                                                                                                                                                                                                                                                                                                                                                                                                                                                                                                                                                                                                                                                                                                                       |                                                                                                                                                                                                                                                                                                                                                                                                                                                                                                                                                                                                                                                                                                                       |                                                                                                                                                                                                                                                                                                                                                                                                                                                                                                                                                                                                                                                                                                                                                                                                                                                                                                                                                              |                                                                                                                                                                                                 |  |  |         |                    |         |         |         |                                                                                                                                                 |                                                                                                                                                                                               |                                                                                                                                                                                                                      |                                                                                                                                                                                                                                                                                                                                                                                                                                                                                                                                     |                                                                                                                                                                                                                                                                                                                                                                                                                                                                                                                                                                                                                                                                                   |                                                                                                                                                                                                                                                                                                                                                                                                                                                                                                                                                                                                                                                                                                                       |                                                                                                                                                                                                                                                                                                                                                                                                                                                                                                                                                                                                                                                                                                                                                                                                                                                                                                                                                              |                                                                                                                                                                                                 |                                                                                                                                                                                             |                                                                                                                           |  |  |
| Level 1                                                                                                                                         | Level 2                                                                                                                                                                                                                                                                                                                                                                                                                                                                                                                             | Level 3                                                                                                                                                                                                                                                                                                                                                                                                                                                                                                                                                                                                                                                                                                                                                                                                                                                                                                                                                                                                                                                                                                                                                                                                                                                                                                                                                                                                                                                                                                                                                                                                                                                                                                                                                                                                                                                                                                                                                                                                                                                                                                                                                                                                                                                                                                                                                                                                                                                                                                                                                                                                                                                                                                                                                                                                                                                                                                                                                                                                                                                                                                                                                                                                                                                                                                                                                                                                                                                                                               | Level 4                                                                                                                                                                                                                                                                                                                                                                                                                                                                                                                                                                                                                                                                                                               | Level 5                                                                                                                                                                                                                                                                                                                                                                                                                                                                                                                                                                                                                                                                                                                                                                                                                                                                                                                                                      |                                                                                                                                                                                                 |  |  |         |                    |         |         |         |                                                                                                                                                 |                                                                                                                                                                                               |                                                                                                                                                                                                                      |                                                                                                                                                                                                                                                                                                                                                                                                                                                                                                                                     |                                                                                                                                                                                                                                                                                                                                                                                                                                                                                                                                                                                                                                                                                   |                                                                                                                                                                                                                                                                                                                                                                                                                                                                                                                                                                                                                                                                                                                       |                                                                                                                                                                                                                                                                                                                                                                                                                                                                                                                                                                                                                                                                                                                                                                                                                                                                                                                                                              |                                                                                                                                                                                                 |                                                                                                                                                                                             |                                                                                                                           |  |  |
| Identifies key components of the complex health care system (e.g., hospital, skilled nursing facility, finance, personnel, technology)          | Describes how components of a complex health care system are inter-related, and how this impacts patient care                                                                                                                                                                                                                                                                                                                                                                                                                       | Discusses how individual practice affects the broader system (e.g., test utilization, turnaround time)                                                                                                                                                                                                                                                                                                                                                                                                                                                                                                                                                                                                                                                                                                                                                                                                                                                                                                                                                                                                                                                                                                                                                                                                                                                                                                                                                                                                                                                                                                                                                                                                                                                                                                                                                                                                                                                                                                                                                                                                                                                                                                                                                                                                                                                                                                                                                                                                                                                                                                                                                                                                                                                                                                                                                                                                                                                                                                                                                                                                                                                                                                                                                                                                                                                                                                                                                                                                | Manages various components of the complex health care system to provide efficient and effective patient care and transition of care                                                                                                                                                                                                                                                                                                                                                                                                                                                                                                                                                                                   | Advocates for or leads systems change that enhances high-value, efficient, and effective patient care and transition of care                                                                                                                                                                                                                                                                                                                                                                                                                                                                                                                                                                                                                                                                                                                                                                                                                                 |                                                                                                                                                                                                 |  |  |         |                    |         |         |         |                                                                                                                                                 |                                                                                                                                                                                               |                                                                                                                                                                                                                      |                                                                                                                                                                                                                                                                                                                                                                                                                                                                                                                                     |                                                                                                                                                                                                                                                                                                                                                                                                                                                                                                                                                                                                                                                                                   |                                                                                                                                                                                                                                                                                                                                                                                                                                                                                                                                                                                                                                                                                                                       |                                                                                                                                                                                                                                                                                                                                                                                                                                                                                                                                                                                                                                                                                                                                                                                                                                                                                                                                                              |                                                                                                                                                                                                 |                                                                                                                                                                                             |                                                                                                                           |  |  |
| Describes basic health payment systems (e.g., government, private, public, uninsured care) and practice models                                  | Documents testing detail and explains the impact of documentation on billing and reimbursement                                                                                                                                                                                                                                                                                                                                                                                                                                      | Engages with clinicians and/or patients in shared-decision making, such as use of preauthorization for complex testing                                                                                                                                                                                                                                                                                                                                                                                                                                                                                                                                                                                                                                                                                                                                                                                                                                                                                                                                                                                                                                                                                                                                                                                                                                                                                                                                                                                                                                                                                                                                                                                                                                                                                                                                                                                                                                                                                                                                                                                                                                                                                                                                                                                                                                                                                                                                                                                                                                                                                                                                                                                                                                                                                                                                                                                                                                                                                                                                                                                                                                                                                                                                                                                                                                                                                                                                                                                | Practices and advocates for cost effective patient care with consideration of the limitations of each patient's payment model                                                                                                                                                                                                                                                                                                                                                                                                                                                                                                                                                                                         | Participates in health policy advocacy activities                                                                                                                                                                                                                                                                                                                                                                                                                                                                                                                                                                                                                                                                                                                                                                                                                                                                                                            |                                                                                                                                                                                                 |  |  |         |                    |         |         |         |                                                                                                                                                 |                                                                                                                                                                                               |                                                                                                                                                                                                                      |                                                                                                                                                                                                                                                                                                                                                                                                                                                                                                                                     |                                                                                                                                                                                                                                                                                                                                                                                                                                                                                                                                                                                                                                                                                   |                                                                                                                                                                                                                                                                                                                                                                                                                                                                                                                                                                                                                                                                                                                       |                                                                                                                                                                                                                                                                                                                                                                                                                                                                                                                                                                                                                                                                                                                                                                                                                                                                                                                                                              |                                                                                                                                                                                                 |                                                                                                                                                                                             |                                                                                                                           |  |  |
| <b>Pathology</b>                                                                                                                                | Informatics                                                                                                                                                                                                                                                                                                                                                                                                                                                                                                                         | <table border="1"> <thead> <tr> <th colspan="5">Systems-Based Practice 4: Informatics (AP/CP)</th> </tr> <tr> <th>Level 1</th> <th>Level 2</th> <th>Level 3</th> <th>Level 4</th> <th>Level 5</th> </tr> </thead> <tbody> <tr> <td>Demonstrates familiarity with basic technical concepts of hardware, operating systems, databases, and software for general purpose applications</td> <td>Understands laboratory specific software, key technical concepts and interfaces, workflow, barcode application, automation systems (enterprise systems architecture)</td> <td>Discusses the role of the pathologist in laboratory initiatives based on integrative pathology informatics and bioinformatics (e.g., laboratory information system implementation and configuration, QI initiatives)</td> <td>Applies knowledge of informatics skills as needed in laboratory initiatives (e.g., data management and security, computational statistics, information governance)</td> <td>Participates in operational and strategy meetings, troubleshooting with information technology staff members; able to utilize medical informatics in the direction and operation of the laboratory</td> </tr> </tbody> </table>                                                                                                                                                                                                                                                                                                                                                                                                                                                                                                                                                                                                                                                                                                                                                                                                                                                                                                                                                                                                                                                                                                                                                                                                                                                                                                                                                                                                                                                                                                                                                                                                                                                                                                                                                                                                                                                                                                                                                                                                                                                                                                                                                                                                                                                                                   | Systems-Based Practice 4: Informatics (AP/CP)                                                                                                                                                                                                                                                                                                                                                                                                                                                                                                                                                                                                                                                                         |                                                                                                                                                                                                                                                                                                                                                                                                                                                                                                                                                                                                                                                                                                                                                                                                                                                                                                                                                              |                                                                                                                                                                                                 |  |  | Level 1 | Level 2            | Level 3 | Level 4 | Level 5 | Demonstrates familiarity with basic technical concepts of hardware, operating systems, databases, and software for general purpose applications | Understands laboratory specific software, key technical concepts and interfaces, workflow, barcode application, automation systems (enterprise systems architecture)                          | Discusses the role of the pathologist in laboratory initiatives based on integrative pathology informatics and bioinformatics (e.g., laboratory information system implementation and configuration, QI initiatives) | Applies knowledge of informatics skills as needed in laboratory initiatives (e.g., data management and security, computational statistics, information governance)                                                                                                                                                                                                                                                                                                                                                                  | Participates in operational and strategy meetings, troubleshooting with information technology staff members; able to utilize medical informatics in the direction and operation of the laboratory                                                                                                                                                                                                                                                                                                                                                                                                                                                                                |                                                                                                                                                                                                                                                                                                                                                                                                                                                                                                                                                                                                                                                                                                                       |                                                                                                                                                                                                                                                                                                                                                                                                                                                                                                                                                                                                                                                                                                                                                                                                                                                                                                                                                              |                                                                                                                                                                                                 |                                                                                                                                                                                             |                                                                                                                           |  |  |
| Systems-Based Practice 4: Informatics (AP/CP)                                                                                                   |                                                                                                                                                                                                                                                                                                                                                                                                                                                                                                                                     |                                                                                                                                                                                                                                                                                                                                                                                                                                                                                                                                                                                                                                                                                                                                                                                                                                                                                                                                                                                                                                                                                                                                                                                                                                                                                                                                                                                                                                                                                                                                                                                                                                                                                                                                                                                                                                                                                                                                                                                                                                                                                                                                                                                                                                                                                                                                                                                                                                                                                                                                                                                                                                                                                                                                                                                                                                                                                                                                                                                                                                                                                                                                                                                                                                                                                                                                                                                                                                                                                                       |                                                                                                                                                                                                                                                                                                                                                                                                                                                                                                                                                                                                                                                                                                                       |                                                                                                                                                                                                                                                                                                                                                                                                                                                                                                                                                                                                                                                                                                                                                                                                                                                                                                                                                              |                                                                                                                                                                                                 |  |  |         |                    |         |         |         |                                                                                                                                                 |                                                                                                                                                                                               |                                                                                                                                                                                                                      |                                                                                                                                                                                                                                                                                                                                                                                                                                                                                                                                     |                                                                                                                                                                                                                                                                                                                                                                                                                                                                                                                                                                                                                                                                                   |                                                                                                                                                                                                                                                                                                                                                                                                                                                                                                                                                                                                                                                                                                                       |                                                                                                                                                                                                                                                                                                                                                                                                                                                                                                                                                                                                                                                                                                                                                                                                                                                                                                                                                              |                                                                                                                                                                                                 |                                                                                                                                                                                             |                                                                                                                           |  |  |
| Level 1                                                                                                                                         | Level 2                                                                                                                                                                                                                                                                                                                                                                                                                                                                                                                             | Level 3                                                                                                                                                                                                                                                                                                                                                                                                                                                                                                                                                                                                                                                                                                                                                                                                                                                                                                                                                                                                                                                                                                                                                                                                                                                                                                                                                                                                                                                                                                                                                                                                                                                                                                                                                                                                                                                                                                                                                                                                                                                                                                                                                                                                                                                                                                                                                                                                                                                                                                                                                                                                                                                                                                                                                                                                                                                                                                                                                                                                                                                                                                                                                                                                                                                                                                                                                                                                                                                                                               | Level 4                                                                                                                                                                                                                                                                                                                                                                                                                                                                                                                                                                                                                                                                                                               | Level 5                                                                                                                                                                                                                                                                                                                                                                                                                                                                                                                                                                                                                                                                                                                                                                                                                                                                                                                                                      |                                                                                                                                                                                                 |  |  |         |                    |         |         |         |                                                                                                                                                 |                                                                                                                                                                                               |                                                                                                                                                                                                                      |                                                                                                                                                                                                                                                                                                                                                                                                                                                                                                                                     |                                                                                                                                                                                                                                                                                                                                                                                                                                                                                                                                                                                                                                                                                   |                                                                                                                                                                                                                                                                                                                                                                                                                                                                                                                                                                                                                                                                                                                       |                                                                                                                                                                                                                                                                                                                                                                                                                                                                                                                                                                                                                                                                                                                                                                                                                                                                                                                                                              |                                                                                                                                                                                                 |                                                                                                                                                                                             |                                                                                                                           |  |  |
| Demonstrates familiarity with basic technical concepts of hardware, operating systems, databases, and software for general purpose applications | Understands laboratory specific software, key technical concepts and interfaces, workflow, barcode application, automation systems (enterprise systems architecture)                                                                                                                                                                                                                                                                                                                                                                | Discusses the role of the pathologist in laboratory initiatives based on integrative pathology informatics and bioinformatics (e.g., laboratory information system implementation and configuration, QI initiatives)                                                                                                                                                                                                                                                                                                                                                                                                                                                                                                                                                                                                                                                                                                                                                                                                                                                                                                                                                                                                                                                                                                                                                                                                                                                                                                                                                                                                                                                                                                                                                                                                                                                                                                                                                                                                                                                                                                                                                                                                                                                                                                                                                                                                                                                                                                                                                                                                                                                                                                                                                                                                                                                                                                                                                                                                                                                                                                                                                                                                                                                                                                                                                                                                                                                                                  | Applies knowledge of informatics skills as needed in laboratory initiatives (e.g., data management and security, computational statistics, information governance)                                                                                                                                                                                                                                                                                                                                                                                                                                                                                                                                                    | Participates in operational and strategy meetings, troubleshooting with information technology staff members; able to utilize medical informatics in the direction and operation of the laboratory                                                                                                                                                                                                                                                                                                                                                                                                                                                                                                                                                                                                                                                                                                                                                           |                                                                                                                                                                                                 |  |  |         |                    |         |         |         |                                                                                                                                                 |                                                                                                                                                                                               |                                                                                                                                                                                                                      |                                                                                                                                                                                                                                                                                                                                                                                                                                                                                                                                     |                                                                                                                                                                                                                                                                                                                                                                                                                                                                                                                                                                                                                                                                                   |                                                                                                                                                                                                                                                                                                                                                                                                                                                                                                                                                                                                                                                                                                                       |                                                                                                                                                                                                                                                                                                                                                                                                                                                                                                                                                                                                                                                                                                                                                                                                                                                                                                                                                              |                                                                                                                                                                                                 |                                                                                                                                                                                             |                                                                                                                           |  |  |
| <b>Pathology</b>                                                                                                                                | QI                                                                                                                                                                                                                                                                                                                                                                                                                                                                                                                                  | <table border="1"> <thead> <tr> <th colspan="5">Systems-Based Practice 5: Accreditation, Compliance, and Quality (AP/CP)</th> </tr> <tr> <th>Level 1</th> <th>Level 2</th> <th>Level 3</th> <th>Level 4</th> <th>Level 5</th> </tr> </thead> <tbody> <tr> <td>Demonstrates knowledge that laboratories must be accredited</td> <td>Demonstrates knowledge of the components of laboratory accreditation and regulatory compliance (Clinical Laboratory Improvement Amendments and others), either through training or experience</td> <td>Identifies the differences between accreditation and regulatory compliance; discusses the process for achieving accreditation and maintaining regulatory compliance</td> <td>Participates in an internal or external laboratory inspection</td> <td>Serves as a resource for accreditation at the regional or national level</td> </tr> <tr> <td>Discusses the need for quality control and proficiency testing</td> <td>Interprets quality data and charts and trends, including proficiency testing results, with assistance</td> <td>Demonstrates knowledge of the components of a laboratory quality management plan<br/><br/>Discusses implications of proficiency testing failures</td> <td>Reviews the quality management plan to identify areas for improvement<br/><br/>Performs analysis and review of proficiency testing failures and recommends a course of action, with oversight</td> <td>Creates and follows a comprehensive quality management plan<br/><br/>Formulates a response for proficiency testing failures</td> </tr> </tbody> </table>                                                                                                                                                                                                                                                                                                                                                                                                                                                                                                                                                                                                                                                                                                                                                                                                                                                                                                                                                                                                                                                                                                                                                                                                                                                                                                                                                                                                                                                                                                                                                                                                                                                                                                                                                                                                                                                                                           | Systems-Based Practice 5: Accreditation, Compliance, and Quality (AP/CP)                                                                                                                                                                                                                                                                                                                                                                                                                                                                                                                                                                                                                                              |                                                                                                                                                                                                                                                                                                                                                                                                                                                                                                                                                                                                                                                                                                                                                                                                                                                                                                                                                              |                                                                                                                                                                                                 |  |  | Level 1 | Level 2            | Level 3 | Level 4 | Level 5 | Demonstrates knowledge that laboratories must be accredited                                                                                     | Demonstrates knowledge of the components of laboratory accreditation and regulatory compliance (Clinical Laboratory Improvement Amendments and others), either through training or experience | Identifies the differences between accreditation and regulatory compliance; discusses the process for achieving accreditation and maintaining regulatory compliance                                                  | Participates in an internal or external laboratory inspection                                                                                                                                                                                                                                                                                                                                                                                                                                                                       | Serves as a resource for accreditation at the regional or national level                                                                                                                                                                                                                                                                                                                                                                                                                                                                                                                                                                                                          | Discusses the need for quality control and proficiency testing                                                                                                                                                                                                                                                                                                                                                                                                                                                                                                                                                                                                                                                        | Interprets quality data and charts and trends, including proficiency testing results, with assistance                                                                                                                                                                                                                                                                                                                                                                                                                                                                                                                                                                                                                                                                                                                                                                                                                                                        | Demonstrates knowledge of the components of a laboratory quality management plan<br><br>Discusses implications of proficiency testing failures                                                  | Reviews the quality management plan to identify areas for improvement<br><br>Performs analysis and review of proficiency testing failures and recommends a course of action, with oversight | Creates and follows a comprehensive quality management plan<br><br>Formulates a response for proficiency testing failures |  |  |
| Systems-Based Practice 5: Accreditation, Compliance, and Quality (AP/CP)                                                                        |                                                                                                                                                                                                                                                                                                                                                                                                                                                                                                                                     |                                                                                                                                                                                                                                                                                                                                                                                                                                                                                                                                                                                                                                                                                                                                                                                                                                                                                                                                                                                                                                                                                                                                                                                                                                                                                                                                                                                                                                                                                                                                                                                                                                                                                                                                                                                                                                                                                                                                                                                                                                                                                                                                                                                                                                                                                                                                                                                                                                                                                                                                                                                                                                                                                                                                                                                                                                                                                                                                                                                                                                                                                                                                                                                                                                                                                                                                                                                                                                                                                                       |                                                                                                                                                                                                                                                                                                                                                                                                                                                                                                                                                                                                                                                                                                                       |                                                                                                                                                                                                                                                                                                                                                                                                                                                                                                                                                                                                                                                                                                                                                                                                                                                                                                                                                              |                                                                                                                                                                                                 |  |  |         |                    |         |         |         |                                                                                                                                                 |                                                                                                                                                                                               |                                                                                                                                                                                                                      |                                                                                                                                                                                                                                                                                                                                                                                                                                                                                                                                     |                                                                                                                                                                                                                                                                                                                                                                                                                                                                                                                                                                                                                                                                                   |                                                                                                                                                                                                                                                                                                                                                                                                                                                                                                                                                                                                                                                                                                                       |                                                                                                                                                                                                                                                                                                                                                                                                                                                                                                                                                                                                                                                                                                                                                                                                                                                                                                                                                              |                                                                                                                                                                                                 |                                                                                                                                                                                             |                                                                                                                           |  |  |
| Level 1                                                                                                                                         | Level 2                                                                                                                                                                                                                                                                                                                                                                                                                                                                                                                             | Level 3                                                                                                                                                                                                                                                                                                                                                                                                                                                                                                                                                                                                                                                                                                                                                                                                                                                                                                                                                                                                                                                                                                                                                                                                                                                                                                                                                                                                                                                                                                                                                                                                                                                                                                                                                                                                                                                                                                                                                                                                                                                                                                                                                                                                                                                                                                                                                                                                                                                                                                                                                                                                                                                                                                                                                                                                                                                                                                                                                                                                                                                                                                                                                                                                                                                                                                                                                                                                                                                                                               | Level 4                                                                                                                                                                                                                                                                                                                                                                                                                                                                                                                                                                                                                                                                                                               | Level 5                                                                                                                                                                                                                                                                                                                                                                                                                                                                                                                                                                                                                                                                                                                                                                                                                                                                                                                                                      |                                                                                                                                                                                                 |  |  |         |                    |         |         |         |                                                                                                                                                 |                                                                                                                                                                                               |                                                                                                                                                                                                                      |                                                                                                                                                                                                                                                                                                                                                                                                                                                                                                                                     |                                                                                                                                                                                                                                                                                                                                                                                                                                                                                                                                                                                                                                                                                   |                                                                                                                                                                                                                                                                                                                                                                                                                                                                                                                                                                                                                                                                                                                       |                                                                                                                                                                                                                                                                                                                                                                                                                                                                                                                                                                                                                                                                                                                                                                                                                                                                                                                                                              |                                                                                                                                                                                                 |                                                                                                                                                                                             |                                                                                                                           |  |  |
| Demonstrates knowledge that laboratories must be accredited                                                                                     | Demonstrates knowledge of the components of laboratory accreditation and regulatory compliance (Clinical Laboratory Improvement Amendments and others), either through training or experience                                                                                                                                                                                                                                                                                                                                       | Identifies the differences between accreditation and regulatory compliance; discusses the process for achieving accreditation and maintaining regulatory compliance                                                                                                                                                                                                                                                                                                                                                                                                                                                                                                                                                                                                                                                                                                                                                                                                                                                                                                                                                                                                                                                                                                                                                                                                                                                                                                                                                                                                                                                                                                                                                                                                                                                                                                                                                                                                                                                                                                                                                                                                                                                                                                                                                                                                                                                                                                                                                                                                                                                                                                                                                                                                                                                                                                                                                                                                                                                                                                                                                                                                                                                                                                                                                                                                                                                                                                                                   | Participates in an internal or external laboratory inspection                                                                                                                                                                                                                                                                                                                                                                                                                                                                                                                                                                                                                                                         | Serves as a resource for accreditation at the regional or national level                                                                                                                                                                                                                                                                                                                                                                                                                                                                                                                                                                                                                                                                                                                                                                                                                                                                                     |                                                                                                                                                                                                 |  |  |         |                    |         |         |         |                                                                                                                                                 |                                                                                                                                                                                               |                                                                                                                                                                                                                      |                                                                                                                                                                                                                                                                                                                                                                                                                                                                                                                                     |                                                                                                                                                                                                                                                                                                                                                                                                                                                                                                                                                                                                                                                                                   |                                                                                                                                                                                                                                                                                                                                                                                                                                                                                                                                                                                                                                                                                                                       |                                                                                                                                                                                                                                                                                                                                                                                                                                                                                                                                                                                                                                                                                                                                                                                                                                                                                                                                                              |                                                                                                                                                                                                 |                                                                                                                                                                                             |                                                                                                                           |  |  |
| Discusses the need for quality control and proficiency testing                                                                                  | Interprets quality data and charts and trends, including proficiency testing results, with assistance                                                                                                                                                                                                                                                                                                                                                                                                                               | Demonstrates knowledge of the components of a laboratory quality management plan<br><br>Discusses implications of proficiency testing failures                                                                                                                                                                                                                                                                                                                                                                                                                                                                                                                                                                                                                                                                                                                                                                                                                                                                                                                                                                                                                                                                                                                                                                                                                                                                                                                                                                                                                                                                                                                                                                                                                                                                                                                                                                                                                                                                                                                                                                                                                                                                                                                                                                                                                                                                                                                                                                                                                                                                                                                                                                                                                                                                                                                                                                                                                                                                                                                                                                                                                                                                                                                                                                                                                                                                                                                                                        | Reviews the quality management plan to identify areas for improvement<br><br>Performs analysis and review of proficiency testing failures and recommends a course of action, with oversight                                                                                                                                                                                                                                                                                                                                                                                                                                                                                                                           | Creates and follows a comprehensive quality management plan<br><br>Formulates a response for proficiency testing failures                                                                                                                                                                                                                                                                                                                                                                                                                                                                                                                                                                                                                                                                                                                                                                                                                                    |                                                                                                                                                                                                 |  |  |         |                    |         |         |         |                                                                                                                                                 |                                                                                                                                                                                               |                                                                                                                                                                                                                      |                                                                                                                                                                                                                                                                                                                                                                                                                                                                                                                                     |                                                                                                                                                                                                                                                                                                                                                                                                                                                                                                                                                                                                                                                                                   |                                                                                                                                                                                                                                                                                                                                                                                                                                                                                                                                                                                                                                                                                                                       |                                                                                                                                                                                                                                                                                                                                                                                                                                                                                                                                                                                                                                                                                                                                                                                                                                                                                                                                                              |                                                                                                                                                                                                 |                                                                                                                                                                                             |                                                                                                                           |  |  |
| <b>Pediatrics</b>                                                                                                                               | CC                                                                                                                                                                                                                                                                                                                                                                                                                                                                                                                                  | <table border="1"> <thead> <tr> <th colspan="6">SBP1. Coordinate patient care within the health care system relevant to their clinical specialty</th> </tr> <tr> <th>Not yet Assessable</th> <th>Level 1</th> <th>Level 2</th> <th>Level 3</th> <th>Level 4</th> <th>Level 5</th> </tr> </thead> <tbody> <tr> <td></td> <td>Performs the role of medical decision-maker, developing care plans and setting goals of care independently; informs patient/family of the plan, but no written care plan is provided; makes referrals, and requests consultations and testing with little or no communication with team members or consultants; is not involved in the transition of care between settings (e.g., outpatient and inpatient, pediatric and adult); shows little or no recognition of social/educational/cultural issues affecting the patient/family</td> <td>Begins to involve the patient/family in setting care goals and some of the decisions involved in the care plan; a written care plan is occasionally made available to the patient/family; care plan does not address key issues; has variable communication with team members and consultants regarding referrals, consultations, and testing; answers patient/family questions regarding results and recommendations; may inconsistently be involved in the transition of care between settings (e.g., outpatient and inpatient, pediatric and adult); makes some assessment of social/educational/cultural issues affecting the patient/family and applies this in interactions</td> <td>Recognizes the responsibility to assist families in navigation of the complex health care system; frequently involves patient/family in decisions at all levels of care, setting goals, and defining care plans; frequently makes a written care plan available to the patient/family and to appropriately authorized members of the care team; care plan omits few key issues; has good communication with team members and consultants; consistently discusses results and recommendations with patient/family; is routinely involved in the transition of care between settings (e.g., outpatient and inpatient, pediatric and adult); considers social, educational and cultural issues in most care interactions</td> <td>Actively assists families in navigating the complex health care system; has open communication, facilitating trust in the patient-physician interaction; develops goals and makes decisions jointly with the patient/family (shared-decision-making); routinely makes a written care plan available to the patient/family and to appropriately authorized members of the care team; makes a thorough care plan, addressing all key issues; facilitates care through consultation, referral, testing, monitoring, and follow-up; helping the family to interpret and act on results/recommendations; coordinates seamless transitions of care between settings (e.g., outpatient and inpatient, pediatric and adult; mental and dental health; education; housing; food security; family-to-family support); builds partnerships that foster family-centered, culturally-effective care, ensuring communication and collaboration along the continuum of care</td> <td>Current literature does not distinguish between behaviors of proficient and expert practitioners. Expertise is not an expectation of GME training, as it requires deliberate practice over time</td> </tr> </tbody> </table> | SBP1. Coordinate patient care within the health care system relevant to their clinical specialty                                                                                                                                                                                                                                                                                                                                                                                                                                                                                                                                                                                                                      |                                                                                                                                                                                                                                                                                                                                                                                                                                                                                                                                                                                                                                                                                                                                                                                                                                                                                                                                                              |                                                                                                                                                                                                 |  |  |         | Not yet Assessable | Level 1 | Level 2 | Level 3 | Level 4                                                                                                                                         | Level 5                                                                                                                                                                                       |                                                                                                                                                                                                                      | Performs the role of medical decision-maker, developing care plans and setting goals of care independently; informs patient/family of the plan, but no written care plan is provided; makes referrals, and requests consultations and testing with little or no communication with team members or consultants; is not involved in the transition of care between settings (e.g., outpatient and inpatient, pediatric and adult); shows little or no recognition of social/educational/cultural issues affecting the patient/family | Begins to involve the patient/family in setting care goals and some of the decisions involved in the care plan; a written care plan is occasionally made available to the patient/family; care plan does not address key issues; has variable communication with team members and consultants regarding referrals, consultations, and testing; answers patient/family questions regarding results and recommendations; may inconsistently be involved in the transition of care between settings (e.g., outpatient and inpatient, pediatric and adult); makes some assessment of social/educational/cultural issues affecting the patient/family and applies this in interactions | Recognizes the responsibility to assist families in navigation of the complex health care system; frequently involves patient/family in decisions at all levels of care, setting goals, and defining care plans; frequently makes a written care plan available to the patient/family and to appropriately authorized members of the care team; care plan omits few key issues; has good communication with team members and consultants; consistently discusses results and recommendations with patient/family; is routinely involved in the transition of care between settings (e.g., outpatient and inpatient, pediatric and adult); considers social, educational and cultural issues in most care interactions | Actively assists families in navigating the complex health care system; has open communication, facilitating trust in the patient-physician interaction; develops goals and makes decisions jointly with the patient/family (shared-decision-making); routinely makes a written care plan available to the patient/family and to appropriately authorized members of the care team; makes a thorough care plan, addressing all key issues; facilitates care through consultation, referral, testing, monitoring, and follow-up; helping the family to interpret and act on results/recommendations; coordinates seamless transitions of care between settings (e.g., outpatient and inpatient, pediatric and adult; mental and dental health; education; housing; food security; family-to-family support); builds partnerships that foster family-centered, culturally-effective care, ensuring communication and collaboration along the continuum of care | Current literature does not distinguish between behaviors of proficient and expert practitioners. Expertise is not an expectation of GME training, as it requires deliberate practice over time |                                                                                                                                                                                             |                                                                                                                           |  |  |
| SBP1. Coordinate patient care within the health care system relevant to their clinical specialty                                                |                                                                                                                                                                                                                                                                                                                                                                                                                                                                                                                                     |                                                                                                                                                                                                                                                                                                                                                                                                                                                                                                                                                                                                                                                                                                                                                                                                                                                                                                                                                                                                                                                                                                                                                                                                                                                                                                                                                                                                                                                                                                                                                                                                                                                                                                                                                                                                                                                                                                                                                                                                                                                                                                                                                                                                                                                                                                                                                                                                                                                                                                                                                                                                                                                                                                                                                                                                                                                                                                                                                                                                                                                                                                                                                                                                                                                                                                                                                                                                                                                                                                       |                                                                                                                                                                                                                                                                                                                                                                                                                                                                                                                                                                                                                                                                                                                       |                                                                                                                                                                                                                                                                                                                                                                                                                                                                                                                                                                                                                                                                                                                                                                                                                                                                                                                                                              |                                                                                                                                                                                                 |  |  |         |                    |         |         |         |                                                                                                                                                 |                                                                                                                                                                                               |                                                                                                                                                                                                                      |                                                                                                                                                                                                                                                                                                                                                                                                                                                                                                                                     |                                                                                                                                                                                                                                                                                                                                                                                                                                                                                                                                                                                                                                                                                   |                                                                                                                                                                                                                                                                                                                                                                                                                                                                                                                                                                                                                                                                                                                       |                                                                                                                                                                                                                                                                                                                                                                                                                                                                                                                                                                                                                                                                                                                                                                                                                                                                                                                                                              |                                                                                                                                                                                                 |                                                                                                                                                                                             |                                                                                                                           |  |  |
| Not yet Assessable                                                                                                                              | Level 1                                                                                                                                                                                                                                                                                                                                                                                                                                                                                                                             | Level 2                                                                                                                                                                                                                                                                                                                                                                                                                                                                                                                                                                                                                                                                                                                                                                                                                                                                                                                                                                                                                                                                                                                                                                                                                                                                                                                                                                                                                                                                                                                                                                                                                                                                                                                                                                                                                                                                                                                                                                                                                                                                                                                                                                                                                                                                                                                                                                                                                                                                                                                                                                                                                                                                                                                                                                                                                                                                                                                                                                                                                                                                                                                                                                                                                                                                                                                                                                                                                                                                                               | Level 3                                                                                                                                                                                                                                                                                                                                                                                                                                                                                                                                                                                                                                                                                                               | Level 4                                                                                                                                                                                                                                                                                                                                                                                                                                                                                                                                                                                                                                                                                                                                                                                                                                                                                                                                                      | Level 5                                                                                                                                                                                         |  |  |         |                    |         |         |         |                                                                                                                                                 |                                                                                                                                                                                               |                                                                                                                                                                                                                      |                                                                                                                                                                                                                                                                                                                                                                                                                                                                                                                                     |                                                                                                                                                                                                                                                                                                                                                                                                                                                                                                                                                                                                                                                                                   |                                                                                                                                                                                                                                                                                                                                                                                                                                                                                                                                                                                                                                                                                                                       |                                                                                                                                                                                                                                                                                                                                                                                                                                                                                                                                                                                                                                                                                                                                                                                                                                                                                                                                                              |                                                                                                                                                                                                 |                                                                                                                                                                                             |                                                                                                                           |  |  |
|                                                                                                                                                 | Performs the role of medical decision-maker, developing care plans and setting goals of care independently; informs patient/family of the plan, but no written care plan is provided; makes referrals, and requests consultations and testing with little or no communication with team members or consultants; is not involved in the transition of care between settings (e.g., outpatient and inpatient, pediatric and adult); shows little or no recognition of social/educational/cultural issues affecting the patient/family | Begins to involve the patient/family in setting care goals and some of the decisions involved in the care plan; a written care plan is occasionally made available to the patient/family; care plan does not address key issues; has variable communication with team members and consultants regarding referrals, consultations, and testing; answers patient/family questions regarding results and recommendations; may inconsistently be involved in the transition of care between settings (e.g., outpatient and inpatient, pediatric and adult); makes some assessment of social/educational/cultural issues affecting the patient/family and applies this in interactions                                                                                                                                                                                                                                                                                                                                                                                                                                                                                                                                                                                                                                                                                                                                                                                                                                                                                                                                                                                                                                                                                                                                                                                                                                                                                                                                                                                                                                                                                                                                                                                                                                                                                                                                                                                                                                                                                                                                                                                                                                                                                                                                                                                                                                                                                                                                                                                                                                                                                                                                                                                                                                                                                                                                                                                                                     | Recognizes the responsibility to assist families in navigation of the complex health care system; frequently involves patient/family in decisions at all levels of care, setting goals, and defining care plans; frequently makes a written care plan available to the patient/family and to appropriately authorized members of the care team; care plan omits few key issues; has good communication with team members and consultants; consistently discusses results and recommendations with patient/family; is routinely involved in the transition of care between settings (e.g., outpatient and inpatient, pediatric and adult); considers social, educational and cultural issues in most care interactions | Actively assists families in navigating the complex health care system; has open communication, facilitating trust in the patient-physician interaction; develops goals and makes decisions jointly with the patient/family (shared-decision-making); routinely makes a written care plan available to the patient/family and to appropriately authorized members of the care team; makes a thorough care plan, addressing all key issues; facilitates care through consultation, referral, testing, monitoring, and follow-up; helping the family to interpret and act on results/recommendations; coordinates seamless transitions of care between settings (e.g., outpatient and inpatient, pediatric and adult; mental and dental health; education; housing; food security; family-to-family support); builds partnerships that foster family-centered, culturally-effective care, ensuring communication and collaboration along the continuum of care | Current literature does not distinguish between behaviors of proficient and expert practitioners. Expertise is not an expectation of GME training, as it requires deliberate practice over time |  |  |         |                    |         |         |         |                                                                                                                                                 |                                                                                                                                                                                               |                                                                                                                                                                                                                      |                                                                                                                                                                                                                                                                                                                                                                                                                                                                                                                                     |                                                                                                                                                                                                                                                                                                                                                                                                                                                                                                                                                                                                                                                                                   |                                                                                                                                                                                                                                                                                                                                                                                                                                                                                                                                                                                                                                                                                                                       |                                                                                                                                                                                                                                                                                                                                                                                                                                                                                                                                                                                                                                                                                                                                                                                                                                                                                                                                                              |                                                                                                                                                                                                 |                                                                                                                                                                                             |                                                                                                                           |  |  |

| <p><b>Pediatrics</b></p>                             | <p>QI</p>                                                                                                                                                                                                                                                                                              | <p><b>SBP2. Advocate for quality patient care and optimal patient care systems</b></p> <table border="1"> <thead> <tr> <th>Not yet Assessable</th> <th>Level 1</th> <th>Level 2</th> <th>Level 3</th> <th>Level 4</th> <th>Level 5</th> </tr> </thead> <tbody> <tr> <td></td> <td> <p>Attends to medical needs of individual patient(s); wants to take good care of patients and takes action for individual patients' health care needs</p> <p><i>Example:</i><br/>Sees a child with a firearm injury and provides good care.</p> </td> <td> <p>Demonstrates recognition that an individual patient's issues are shared by other patients, that there are systems at play, and that there is a need for quality improvement of those systems; acts on the observed need to assess and improve quality of care</p> <p><i>Example:</i><br/>A physician notes on rounds, "We have sent home four-to-five firearm-injury patients and one has come back with repeated injury. We need to do something about that."</p> </td> <td> <p>Acts within the defined medical role to address an issue or problem that is confronting a cohort of patients; may enlist colleagues to help with this problem</p> <p><i>Example:</i><br/>The physician works with colleagues to develop an approach, protocol, or procedure for improving care for penetrating trauma injury in children and measures the outcomes of system changes.</p> </td> <td> <p>Actively participates in hospital-initiated quality improvement and safety actions; demonstrates a desire to have an impact beyond the hospital walls</p> <p><i>Example:</i><br/>The physician attends a hospital symposium on gun-related trauma and what can be done about it and then arranges to speak on gun safety at the local meeting of the parent-teacher association.</p> </td> <td> <p>Identifies and acts to begin the process of improvement projects both inside the hospital and within one's practice community</p> <p><i>Example:</i><br/>Upon completion of quality improvement project, the physician works on new proposed legislation and testifies in City Council.</p> </td> </tr> </tbody> </table> | Not yet Assessable                                                                                                                                                                                                                                                                                                                                                                           | Level 1                                                                                                                                                                                                                                                                                                                                                                                 | Level 2                                                                                                                                                                                                                                                                                                                              | Level 3 | Level 4                     | Level 5                |  | <p>Attends to medical needs of individual patient(s); wants to take good care of patients and takes action for individual patients' health care needs</p> <p><i>Example:</i><br/>Sees a child with a firearm injury and provides good care.</p>                                                        | <p>Demonstrates recognition that an individual patient's issues are shared by other patients, that there are systems at play, and that there is a need for quality improvement of those systems; acts on the observed need to assess and improve quality of care</p> <p><i>Example:</i><br/>A physician notes on rounds, "We have sent home four-to-five firearm-injury patients and one has come back with repeated injury. We need to do something about that."</p> | <p>Acts within the defined medical role to address an issue or problem that is confronting a cohort of patients; may enlist colleagues to help with this problem</p> <p><i>Example:</i><br/>The physician works with colleagues to develop an approach, protocol, or procedure for improving care for penetrating trauma injury in children and measures the outcomes of system changes.</p> | <p>Actively participates in hospital-initiated quality improvement and safety actions; demonstrates a desire to have an impact beyond the hospital walls</p> <p><i>Example:</i><br/>The physician attends a hospital symposium on gun-related trauma and what can be done about it and then arranges to speak on gun safety at the local meeting of the parent-teacher association.</p> | <p>Identifies and acts to begin the process of improvement projects both inside the hospital and within one's practice community</p> <p><i>Example:</i><br/>Upon completion of quality improvement project, the physician works on new proposed legislation and testifies in City Council.</p>                                       |  |  |
|------------------------------------------------------|--------------------------------------------------------------------------------------------------------------------------------------------------------------------------------------------------------------------------------------------------------------------------------------------------------|------------------------------------------------------------------------------------------------------------------------------------------------------------------------------------------------------------------------------------------------------------------------------------------------------------------------------------------------------------------------------------------------------------------------------------------------------------------------------------------------------------------------------------------------------------------------------------------------------------------------------------------------------------------------------------------------------------------------------------------------------------------------------------------------------------------------------------------------------------------------------------------------------------------------------------------------------------------------------------------------------------------------------------------------------------------------------------------------------------------------------------------------------------------------------------------------------------------------------------------------------------------------------------------------------------------------------------------------------------------------------------------------------------------------------------------------------------------------------------------------------------------------------------------------------------------------------------------------------------------------------------------------------------------------------------------------------------------------------------------------------------------------------------------------------------------------------------------------------------------------------------------------------------------------------------------------------------------------------------------------------------------------------------------------------------------------------------------------------------------------------------------------------------------------|----------------------------------------------------------------------------------------------------------------------------------------------------------------------------------------------------------------------------------------------------------------------------------------------------------------------------------------------------------------------------------------------|-----------------------------------------------------------------------------------------------------------------------------------------------------------------------------------------------------------------------------------------------------------------------------------------------------------------------------------------------------------------------------------------|--------------------------------------------------------------------------------------------------------------------------------------------------------------------------------------------------------------------------------------------------------------------------------------------------------------------------------------|---------|-----------------------------|------------------------|--|--------------------------------------------------------------------------------------------------------------------------------------------------------------------------------------------------------------------------------------------------------------------------------------------------------|-----------------------------------------------------------------------------------------------------------------------------------------------------------------------------------------------------------------------------------------------------------------------------------------------------------------------------------------------------------------------------------------------------------------------------------------------------------------------|----------------------------------------------------------------------------------------------------------------------------------------------------------------------------------------------------------------------------------------------------------------------------------------------------------------------------------------------------------------------------------------------|-----------------------------------------------------------------------------------------------------------------------------------------------------------------------------------------------------------------------------------------------------------------------------------------------------------------------------------------------------------------------------------------|--------------------------------------------------------------------------------------------------------------------------------------------------------------------------------------------------------------------------------------------------------------------------------------------------------------------------------------|--|--|
| Not yet Assessable                                   | Level 1                                                                                                                                                                                                                                                                                                | Level 2                                                                                                                                                                                                                                                                                                                                                                                                                                                                                                                                                                                                                                                                                                                                                                                                                                                                                                                                                                                                                                                                                                                                                                                                                                                                                                                                                                                                                                                                                                                                                                                                                                                                                                                                                                                                                                                                                                                                                                                                                                                                                                                                                                | Level 3                                                                                                                                                                                                                                                                                                                                                                                      | Level 4                                                                                                                                                                                                                                                                                                                                                                                 | Level 5                                                                                                                                                                                                                                                                                                                              |         |                             |                        |  |                                                                                                                                                                                                                                                                                                        |                                                                                                                                                                                                                                                                                                                                                                                                                                                                       |                                                                                                                                                                                                                                                                                                                                                                                              |                                                                                                                                                                                                                                                                                                                                                                                         |                                                                                                                                                                                                                                                                                                                                      |  |  |
|                                                      | <p>Attends to medical needs of individual patient(s); wants to take good care of patients and takes action for individual patients' health care needs</p> <p><i>Example:</i><br/>Sees a child with a firearm injury and provides good care.</p>                                                        | <p>Demonstrates recognition that an individual patient's issues are shared by other patients, that there are systems at play, and that there is a need for quality improvement of those systems; acts on the observed need to assess and improve quality of care</p> <p><i>Example:</i><br/>A physician notes on rounds, "We have sent home four-to-five firearm-injury patients and one has come back with repeated injury. We need to do something about that."</p>                                                                                                                                                                                                                                                                                                                                                                                                                                                                                                                                                                                                                                                                                                                                                                                                                                                                                                                                                                                                                                                                                                                                                                                                                                                                                                                                                                                                                                                                                                                                                                                                                                                                                                  | <p>Acts within the defined medical role to address an issue or problem that is confronting a cohort of patients; may enlist colleagues to help with this problem</p> <p><i>Example:</i><br/>The physician works with colleagues to develop an approach, protocol, or procedure for improving care for penetrating trauma injury in children and measures the outcomes of system changes.</p> | <p>Actively participates in hospital-initiated quality improvement and safety actions; demonstrates a desire to have an impact beyond the hospital walls</p> <p><i>Example:</i><br/>The physician attends a hospital symposium on gun-related trauma and what can be done about it and then arranges to speak on gun safety at the local meeting of the parent-teacher association.</p> | <p>Identifies and acts to begin the process of improvement projects both inside the hospital and within one's practice community</p> <p><i>Example:</i><br/>Upon completion of quality improvement project, the physician works on new proposed legislation and testifies in City Council.</p>                                       |         |                             |                        |  |                                                                                                                                                                                                                                                                                                        |                                                                                                                                                                                                                                                                                                                                                                                                                                                                       |                                                                                                                                                                                                                                                                                                                                                                                              |                                                                                                                                                                                                                                                                                                                                                                                         |                                                                                                                                                                                                                                                                                                                                      |  |  |
| <p><b>Pediatrics</b></p>                             | <p>Teams</p>                                                                                                                                                                                                                                                                                           | <p><b>SBP3. Work in inter-professional teams to enhance patient safety and improve patient care quality</b></p> <table border="1"> <thead> <tr> <th>Not yet Assessable</th> <th>Level 1</th> <th>Level 2</th> <th>Level 3</th> <th>Level 4</th> <th>Level 5</th> </tr> </thead> <tbody> <tr> <td></td> <td> <p>Seeks answers and responds to authority from only intra-professional colleagues; does not recognize other members of the interdisciplinary team as being important or making significant contributions to the team; tends to dismiss input from other professionals aside from other physicians</p> </td> <td> <p>Is beginning to have an understanding of the other professionals on the team, especially their unique knowledge base, and is open to their input; however, still acquiesces to physician authorities to resolve conflict and provide answers in the face of ambiguity; is not dismissive of other health care professionals, but is unlikely to seek out those individuals when confronted with ambiguous situations</p> </td> <td> <p>Aware of the unique contributions (knowledge, skills, and attitudes) of other health care professionals, and seeks their input for appropriate issues, and as a result, is an excellent team player</p> </td> <td> <p>Same as Level 3, but an individual at this stage understands the broader connectivity of the professions and their complementary nature; recognizes that quality patient care only occurs in the context of the inter-professional team; serves as a role model for others in interdisciplinary work and is an excellent team leader</p> </td> <td> <p>Current literature does not distinguish between behaviors of proficient and expert practitioners. Expertise is not an expectation of GME training, as it requires deliberate practice over time</p> </td> </tr> </tbody> </table>                                                                                                                                                                                                                                                                                 | Not yet Assessable                                                                                                                                                                                                                                                                                                                                                                           | Level 1                                                                                                                                                                                                                                                                                                                                                                                 | Level 2                                                                                                                                                                                                                                                                                                                              | Level 3 | Level 4                     | Level 5                |  | <p>Seeks answers and responds to authority from only intra-professional colleagues; does not recognize other members of the interdisciplinary team as being important or making significant contributions to the team; tends to dismiss input from other professionals aside from other physicians</p> | <p>Is beginning to have an understanding of the other professionals on the team, especially their unique knowledge base, and is open to their input; however, still acquiesces to physician authorities to resolve conflict and provide answers in the face of ambiguity; is not dismissive of other health care professionals, but is unlikely to seek out those individuals when confronted with ambiguous situations</p>                                           | <p>Aware of the unique contributions (knowledge, skills, and attitudes) of other health care professionals, and seeks their input for appropriate issues, and as a result, is an excellent team player</p>                                                                                                                                                                                   | <p>Same as Level 3, but an individual at this stage understands the broader connectivity of the professions and their complementary nature; recognizes that quality patient care only occurs in the context of the inter-professional team; serves as a role model for others in interdisciplinary work and is an excellent team leader</p>                                             | <p>Current literature does not distinguish between behaviors of proficient and expert practitioners. Expertise is not an expectation of GME training, as it requires deliberate practice over time</p>                                                                                                                               |  |  |
| Not yet Assessable                                   | Level 1                                                                                                                                                                                                                                                                                                | Level 2                                                                                                                                                                                                                                                                                                                                                                                                                                                                                                                                                                                                                                                                                                                                                                                                                                                                                                                                                                                                                                                                                                                                                                                                                                                                                                                                                                                                                                                                                                                                                                                                                                                                                                                                                                                                                                                                                                                                                                                                                                                                                                                                                                | Level 3                                                                                                                                                                                                                                                                                                                                                                                      | Level 4                                                                                                                                                                                                                                                                                                                                                                                 | Level 5                                                                                                                                                                                                                                                                                                                              |         |                             |                        |  |                                                                                                                                                                                                                                                                                                        |                                                                                                                                                                                                                                                                                                                                                                                                                                                                       |                                                                                                                                                                                                                                                                                                                                                                                              |                                                                                                                                                                                                                                                                                                                                                                                         |                                                                                                                                                                                                                                                                                                                                      |  |  |
|                                                      | <p>Seeks answers and responds to authority from only intra-professional colleagues; does not recognize other members of the interdisciplinary team as being important or making significant contributions to the team; tends to dismiss input from other professionals aside from other physicians</p> | <p>Is beginning to have an understanding of the other professionals on the team, especially their unique knowledge base, and is open to their input; however, still acquiesces to physician authorities to resolve conflict and provide answers in the face of ambiguity; is not dismissive of other health care professionals, but is unlikely to seek out those individuals when confronted with ambiguous situations</p>                                                                                                                                                                                                                                                                                                                                                                                                                                                                                                                                                                                                                                                                                                                                                                                                                                                                                                                                                                                                                                                                                                                                                                                                                                                                                                                                                                                                                                                                                                                                                                                                                                                                                                                                            | <p>Aware of the unique contributions (knowledge, skills, and attitudes) of other health care professionals, and seeks their input for appropriate issues, and as a result, is an excellent team player</p>                                                                                                                                                                                   | <p>Same as Level 3, but an individual at this stage understands the broader connectivity of the professions and their complementary nature; recognizes that quality patient care only occurs in the context of the inter-professional team; serves as a role model for others in interdisciplinary work and is an excellent team leader</p>                                             | <p>Current literature does not distinguish between behaviors of proficient and expert practitioners. Expertise is not an expectation of GME training, as it requires deliberate practice over time</p>                                                                                                                               |         |                             |                        |  |                                                                                                                                                                                                                                                                                                        |                                                                                                                                                                                                                                                                                                                                                                                                                                                                       |                                                                                                                                                                                                                                                                                                                                                                                              |                                                                                                                                                                                                                                                                                                                                                                                         |                                                                                                                                                                                                                                                                                                                                      |  |  |
| <p><b>Physical Medicine &amp; Rehabilitation</b></p> | <p>HC Systems</p>                                                                                                                                                                                                                                                                                      | <p><b>SBP 1. Systems thinking: demonstrates awareness of and responsiveness to larger context and system of care, including:</b></p> <ul style="list-style-type: none"> <li>Working effectively in various health care delivery settings and systems relevant to physical medicine and rehabilitation</li> <li>Coordinating patient care within the health care system</li> <li>Advocating for quality patient care and optimal patient care systems</li> </ul> <table border="1"> <thead> <tr> <th>Has not Achieved Level 1</th> <th>Level 1</th> <th>Level 2</th> <th>Level 3</th> <th>Level 4 (Graduation Target)</th> <th>Level 5 (Aspirational)</th> </tr> </thead> <tbody> <tr> <td></td> <td> <p>Acknowledges that health care is delivered in a complex system of care</p> </td> <td> <p>Describes and differentiates between the various systems of care in which rehabilitation is provided (e.g., acute care; inpatient rehabilitation facility (IRF); skilled nursing facility (SNF), outpatient, home health care, etc.)</p> </td> <td> <p>Has learned to coordinate care across a variety of settings (e.g., inpatient, outpatient, consultative, etc.)</p> <p>Incorporates patient-specific rehabilitation needs, social factors, cost/benefit, and resources into decision-making (e.g., inpatient admission, length of stay, discharge destination, equipment, essential outpatient services, medical management, etc.)</p> </td> <td> <p>Advocates for and provides high-quality, safe, well-coordinated, patient-centered care across the health care system</p> <p>Efficiently manages and coordinates patient transitions between various settings (e.g., acute, IRF, SNF, community, etc.)</p> </td> <td> <p>Optimally coordinates care and advocates to improve care provided through health care, social/community, and governmental systems</p> <p>Successfully organizes appeals for coverage and advocates for patient and family in complex situations</p> <p>Maintains regulatory compliance, including accurate coding and billing</p> </td> </tr> </tbody> </table>                                                                     | Has not Achieved Level 1                                                                                                                                                                                                                                                                                                                                                                     | Level 1                                                                                                                                                                                                                                                                                                                                                                                 | Level 2                                                                                                                                                                                                                                                                                                                              | Level 3 | Level 4 (Graduation Target) | Level 5 (Aspirational) |  | <p>Acknowledges that health care is delivered in a complex system of care</p>                                                                                                                                                                                                                          | <p>Describes and differentiates between the various systems of care in which rehabilitation is provided (e.g., acute care; inpatient rehabilitation facility (IRF); skilled nursing facility (SNF), outpatient, home health care, etc.)</p>                                                                                                                                                                                                                           | <p>Has learned to coordinate care across a variety of settings (e.g., inpatient, outpatient, consultative, etc.)</p> <p>Incorporates patient-specific rehabilitation needs, social factors, cost/benefit, and resources into decision-making (e.g., inpatient admission, length of stay, discharge destination, equipment, essential outpatient services, medical management, etc.)</p>      | <p>Advocates for and provides high-quality, safe, well-coordinated, patient-centered care across the health care system</p> <p>Efficiently manages and coordinates patient transitions between various settings (e.g., acute, IRF, SNF, community, etc.)</p>                                                                                                                            | <p>Optimally coordinates care and advocates to improve care provided through health care, social/community, and governmental systems</p> <p>Successfully organizes appeals for coverage and advocates for patient and family in complex situations</p> <p>Maintains regulatory compliance, including accurate coding and billing</p> |  |  |
| Has not Achieved Level 1                             | Level 1                                                                                                                                                                                                                                                                                                | Level 2                                                                                                                                                                                                                                                                                                                                                                                                                                                                                                                                                                                                                                                                                                                                                                                                                                                                                                                                                                                                                                                                                                                                                                                                                                                                                                                                                                                                                                                                                                                                                                                                                                                                                                                                                                                                                                                                                                                                                                                                                                                                                                                                                                | Level 3                                                                                                                                                                                                                                                                                                                                                                                      | Level 4 (Graduation Target)                                                                                                                                                                                                                                                                                                                                                             | Level 5 (Aspirational)                                                                                                                                                                                                                                                                                                               |         |                             |                        |  |                                                                                                                                                                                                                                                                                                        |                                                                                                                                                                                                                                                                                                                                                                                                                                                                       |                                                                                                                                                                                                                                                                                                                                                                                              |                                                                                                                                                                                                                                                                                                                                                                                         |                                                                                                                                                                                                                                                                                                                                      |  |  |
|                                                      | <p>Acknowledges that health care is delivered in a complex system of care</p>                                                                                                                                                                                                                          | <p>Describes and differentiates between the various systems of care in which rehabilitation is provided (e.g., acute care; inpatient rehabilitation facility (IRF); skilled nursing facility (SNF), outpatient, home health care, etc.)</p>                                                                                                                                                                                                                                                                                                                                                                                                                                                                                                                                                                                                                                                                                                                                                                                                                                                                                                                                                                                                                                                                                                                                                                                                                                                                                                                                                                                                                                                                                                                                                                                                                                                                                                                                                                                                                                                                                                                            | <p>Has learned to coordinate care across a variety of settings (e.g., inpatient, outpatient, consultative, etc.)</p> <p>Incorporates patient-specific rehabilitation needs, social factors, cost/benefit, and resources into decision-making (e.g., inpatient admission, length of stay, discharge destination, equipment, essential outpatient services, medical management, etc.)</p>      | <p>Advocates for and provides high-quality, safe, well-coordinated, patient-centered care across the health care system</p> <p>Efficiently manages and coordinates patient transitions between various settings (e.g., acute, IRF, SNF, community, etc.)</p>                                                                                                                            | <p>Optimally coordinates care and advocates to improve care provided through health care, social/community, and governmental systems</p> <p>Successfully organizes appeals for coverage and advocates for patient and family in complex situations</p> <p>Maintains regulatory compliance, including accurate coding and billing</p> |         |                             |                        |  |                                                                                                                                                                                                                                                                                                        |                                                                                                                                                                                                                                                                                                                                                                                                                                                                       |                                                                                                                                                                                                                                                                                                                                                                                              |                                                                                                                                                                                                                                                                                                                                                                                         |                                                                                                                                                                                                                                                                                                                                      |  |  |
| <p><b>Physical Medicine &amp; Rehabilitation</b></p> | <p>Teams</p>                                                                                                                                                                                                                                                                                           | <p><b>SBP 2. Team approach to enhance patient care coordination. Rehabilitation team members may include occupational and physical therapists, speech language pathologists, rehabilitation nurses, nurse practitioners, psychologists, therapeutic recreation specialists, case managers, social workers, and education and vocational specialists.</b></p> <table border="1"> <thead> <tr> <th>Has not Achieved Level 1</th> <th>Level 1</th> <th>Level 2</th> <th>Level 3</th> <th>Level 4 (Graduation Target)</th> <th>Level 5 (Aspirational)</th> </tr> </thead> <tbody> <tr> <td></td> <td> <p>Actively participates in team-based care</p> </td> <td> <p>Directs questions/comments to appropriate team members demonstrating understanding of their roles in patient care</p> </td> <td> <p>Collaborates effectively and respectfully with the patient and family, multiple providers, and the interdisciplinary team to develop patient-centered goals</p> </td> <td> <p>Leads the interdisciplinary team to ensure high quality, safe patient care</p> <p>Creates an environment where team members are encouraged to voice concerns and share their expertise</p> </td> <td> <p>Anticipates team dynamics and effectively manages interactions to optimize group performance</p> </td> </tr> </tbody> </table>                                                                                                                                                                                                                                                                                                                                                                                                                                                                                                                                                                                                                                                                                                                                                                                                                                              | Has not Achieved Level 1                                                                                                                                                                                                                                                                                                                                                                     | Level 1                                                                                                                                                                                                                                                                                                                                                                                 | Level 2                                                                                                                                                                                                                                                                                                                              | Level 3 | Level 4 (Graduation Target) | Level 5 (Aspirational) |  | <p>Actively participates in team-based care</p>                                                                                                                                                                                                                                                        | <p>Directs questions/comments to appropriate team members demonstrating understanding of their roles in patient care</p>                                                                                                                                                                                                                                                                                                                                              | <p>Collaborates effectively and respectfully with the patient and family, multiple providers, and the interdisciplinary team to develop patient-centered goals</p>                                                                                                                                                                                                                           | <p>Leads the interdisciplinary team to ensure high quality, safe patient care</p> <p>Creates an environment where team members are encouraged to voice concerns and share their expertise</p>                                                                                                                                                                                           | <p>Anticipates team dynamics and effectively manages interactions to optimize group performance</p>                                                                                                                                                                                                                                  |  |  |
| Has not Achieved Level 1                             | Level 1                                                                                                                                                                                                                                                                                                | Level 2                                                                                                                                                                                                                                                                                                                                                                                                                                                                                                                                                                                                                                                                                                                                                                                                                                                                                                                                                                                                                                                                                                                                                                                                                                                                                                                                                                                                                                                                                                                                                                                                                                                                                                                                                                                                                                                                                                                                                                                                                                                                                                                                                                | Level 3                                                                                                                                                                                                                                                                                                                                                                                      | Level 4 (Graduation Target)                                                                                                                                                                                                                                                                                                                                                             | Level 5 (Aspirational)                                                                                                                                                                                                                                                                                                               |         |                             |                        |  |                                                                                                                                                                                                                                                                                                        |                                                                                                                                                                                                                                                                                                                                                                                                                                                                       |                                                                                                                                                                                                                                                                                                                                                                                              |                                                                                                                                                                                                                                                                                                                                                                                         |                                                                                                                                                                                                                                                                                                                                      |  |  |
|                                                      | <p>Actively participates in team-based care</p>                                                                                                                                                                                                                                                        | <p>Directs questions/comments to appropriate team members demonstrating understanding of their roles in patient care</p>                                                                                                                                                                                                                                                                                                                                                                                                                                                                                                                                                                                                                                                                                                                                                                                                                                                                                                                                                                                                                                                                                                                                                                                                                                                                                                                                                                                                                                                                                                                                                                                                                                                                                                                                                                                                                                                                                                                                                                                                                                               | <p>Collaborates effectively and respectfully with the patient and family, multiple providers, and the interdisciplinary team to develop patient-centered goals</p>                                                                                                                                                                                                                           | <p>Leads the interdisciplinary team to ensure high quality, safe patient care</p> <p>Creates an environment where team members are encouraged to voice concerns and share their expertise</p>                                                                                                                                                                                           | <p>Anticipates team dynamics and effectively manages interactions to optimize group performance</p>                                                                                                                                                                                                                                  |         |                             |                        |  |                                                                                                                                                                                                                                                                                                        |                                                                                                                                                                                                                                                                                                                                                                                                                                                                       |                                                                                                                                                                                                                                                                                                                                                                                              |                                                                                                                                                                                                                                                                                                                                                                                         |                                                                                                                                                                                                                                                                                                                                      |  |  |
| <p><b>Physical Medicine &amp; Rehabilitation</b></p> | <p>PS</p>                                                                                                                                                                                                                                                                                              | <p><b>SBP 3. Patient safety: Understands ways to improve health care safety through participation in identifying system errors and implementing potential systems solutions</b></p> <table border="1"> <thead> <tr> <th>Has not Achieved Level 1</th> <th>Level 1</th> <th>Level 2</th> <th>Level 3</th> <th>Level 4 (Graduation Target)</th> <th>Level 5 (Aspirational)</th> </tr> </thead> <tbody> <tr> <td></td> <td> <p>Recognizes the impact of process and systems failures on patient safety</p> </td> <td> <p>Participates in established safety initiatives (e.g., use of approved abbreviations, isolation precautions, hand washing)</p> <p>Applies structured process(es) to foster clear, concise, accurate, and specific communication during patient hand-offs</p> </td> <td> <p>Identifies health system factors that increase risk for errors, (e.g., errors in the Electronic Medical Record, lack of health information exchange)</p> <p>Utilizes existing processes and procedures for reporting problematic events</p> </td> <td> <p>Partners with others in activities to improve patient safety</p> <p>Learns from critical incidents or systems failures that have impacted patient safety</p> </td> <td> <p>Leads systems-level patient safety interventions</p> <p>Proactively identifies system failures and risks for medical errors</p> </td> </tr> </tbody> </table>                                                                                                                                                                                                                                                                                                                                                                                                                                                                                                                                                                                                                                                                                                                                                                     | Has not Achieved Level 1                                                                                                                                                                                                                                                                                                                                                                     | Level 1                                                                                                                                                                                                                                                                                                                                                                                 | Level 2                                                                                                                                                                                                                                                                                                                              | Level 3 | Level 4 (Graduation Target) | Level 5 (Aspirational) |  | <p>Recognizes the impact of process and systems failures on patient safety</p>                                                                                                                                                                                                                         | <p>Participates in established safety initiatives (e.g., use of approved abbreviations, isolation precautions, hand washing)</p> <p>Applies structured process(es) to foster clear, concise, accurate, and specific communication during patient hand-offs</p>                                                                                                                                                                                                        | <p>Identifies health system factors that increase risk for errors, (e.g., errors in the Electronic Medical Record, lack of health information exchange)</p> <p>Utilizes existing processes and procedures for reporting problematic events</p>                                                                                                                                               | <p>Partners with others in activities to improve patient safety</p> <p>Learns from critical incidents or systems failures that have impacted patient safety</p>                                                                                                                                                                                                                         | <p>Leads systems-level patient safety interventions</p> <p>Proactively identifies system failures and risks for medical errors</p>                                                                                                                                                                                                   |  |  |
| Has not Achieved Level 1                             | Level 1                                                                                                                                                                                                                                                                                                | Level 2                                                                                                                                                                                                                                                                                                                                                                                                                                                                                                                                                                                                                                                                                                                                                                                                                                                                                                                                                                                                                                                                                                                                                                                                                                                                                                                                                                                                                                                                                                                                                                                                                                                                                                                                                                                                                                                                                                                                                                                                                                                                                                                                                                | Level 3                                                                                                                                                                                                                                                                                                                                                                                      | Level 4 (Graduation Target)                                                                                                                                                                                                                                                                                                                                                             | Level 5 (Aspirational)                                                                                                                                                                                                                                                                                                               |         |                             |                        |  |                                                                                                                                                                                                                                                                                                        |                                                                                                                                                                                                                                                                                                                                                                                                                                                                       |                                                                                                                                                                                                                                                                                                                                                                                              |                                                                                                                                                                                                                                                                                                                                                                                         |                                                                                                                                                                                                                                                                                                                                      |  |  |
|                                                      | <p>Recognizes the impact of process and systems failures on patient safety</p>                                                                                                                                                                                                                         | <p>Participates in established safety initiatives (e.g., use of approved abbreviations, isolation precautions, hand washing)</p> <p>Applies structured process(es) to foster clear, concise, accurate, and specific communication during patient hand-offs</p>                                                                                                                                                                                                                                                                                                                                                                                                                                                                                                                                                                                                                                                                                                                                                                                                                                                                                                                                                                                                                                                                                                                                                                                                                                                                                                                                                                                                                                                                                                                                                                                                                                                                                                                                                                                                                                                                                                         | <p>Identifies health system factors that increase risk for errors, (e.g., errors in the Electronic Medical Record, lack of health information exchange)</p> <p>Utilizes existing processes and procedures for reporting problematic events</p>                                                                                                                                               | <p>Partners with others in activities to improve patient safety</p> <p>Learns from critical incidents or systems failures that have impacted patient safety</p>                                                                                                                                                                                                                         | <p>Leads systems-level patient safety interventions</p> <p>Proactively identifies system failures and risks for medical errors</p>                                                                                                                                                                                                   |         |                             |                        |  |                                                                                                                                                                                                                                                                                                        |                                                                                                                                                                                                                                                                                                                                                                                                                                                                       |                                                                                                                                                                                                                                                                                                                                                                                              |                                                                                                                                                                                                                                                                                                                                                                                         |                                                                                                                                                                                                                                                                                                                                      |  |  |

| <b>Plastic Surgery</b>                                                                                                                                                                                                                                                            | PS                                                                                                                                                                                                   | <table border="1"> <thead> <tr> <th colspan="5">Patient Safety — Systems-based Practice</th> </tr> <tr> <th>Level 1</th> <th>Level 2</th> <th>Level 3</th> <th>Level 4</th> <th>Level 5</th> </tr> </thead> <tbody> <tr> <td> <ul style="list-style-type: none"> <li>Understands the differences between medical errors, near misses, and sentinel events</li> <li>Understands the roles of care team members</li> </ul> </td> <td> <ul style="list-style-type: none"> <li>Participates in the use of tools to prevent adverse events (e.g., checklists and briefings)</li> <li>Describes the common system causes for errors</li> </ul> </td> <td> <ul style="list-style-type: none"> <li>Consistently uses tools to prevent adverse events (e.g., checklists and briefings)</li> <li>Reports problematic behaviors, processes, and devices, including errors and near misses</li> </ul> </td> <td> <ul style="list-style-type: none"> <li>Formally analyzes shared team experiences to prevent future errors using proven analysis techniques (e.g., root cause analysis, failure mode effects analysis)</li> <li>Leads team by promoting situational awareness and input by all team members</li> <li>Conducts morbidity and mortality conferences to improve patient safety</li> </ul> </td> <td> <ul style="list-style-type: none"> <li>Leads curriculum design to teach teamwork and communication skills to health care professionals</li> <li>Helps lead a multidisciplinary team (e.g., human factors engineers, social scientists) to address patient safety issues</li> </ul> </td> </tr> </tbody> </table> | Patient Safety — Systems-based Practice                                                                                                                                                                                                                                                                                                                                               |                                                                                                                                                                                                                                                                                    |  |  |  | Level 1 | Level 2 | Level 3 | Level 4 | Level 5 | <ul style="list-style-type: none"> <li>Understands the differences between medical errors, near misses, and sentinel events</li> <li>Understands the roles of care team members</li> </ul>                                                               | <ul style="list-style-type: none"> <li>Participates in the use of tools to prevent adverse events (e.g., checklists and briefings)</li> <li>Describes the common system causes for errors</li> </ul> | <ul style="list-style-type: none"> <li>Consistently uses tools to prevent adverse events (e.g., checklists and briefings)</li> <li>Reports problematic behaviors, processes, and devices, including errors and near misses</li> </ul>                                                                            | <ul style="list-style-type: none"> <li>Formally analyzes shared team experiences to prevent future errors using proven analysis techniques (e.g., root cause analysis, failure mode effects analysis)</li> <li>Leads team by promoting situational awareness and input by all team members</li> <li>Conducts morbidity and mortality conferences to improve patient safety</li> </ul> | <ul style="list-style-type: none"> <li>Leads curriculum design to teach teamwork and communication skills to health care professionals</li> <li>Helps lead a multidisciplinary team (e.g., human factors engineers, social scientists) to address patient safety issues</li> </ul> |  |  |
|-----------------------------------------------------------------------------------------------------------------------------------------------------------------------------------------------------------------------------------------------------------------------------------|------------------------------------------------------------------------------------------------------------------------------------------------------------------------------------------------------|------------------------------------------------------------------------------------------------------------------------------------------------------------------------------------------------------------------------------------------------------------------------------------------------------------------------------------------------------------------------------------------------------------------------------------------------------------------------------------------------------------------------------------------------------------------------------------------------------------------------------------------------------------------------------------------------------------------------------------------------------------------------------------------------------------------------------------------------------------------------------------------------------------------------------------------------------------------------------------------------------------------------------------------------------------------------------------------------------------------------------------------------------------------------------------------------------------------------------------------------------------------------------------------------------------------------------------------------------------------------------------------------------------------------------------------------------------------------------------------------------------------------------------------------------------------------------------------------------------------------|---------------------------------------------------------------------------------------------------------------------------------------------------------------------------------------------------------------------------------------------------------------------------------------------------------------------------------------------------------------------------------------|------------------------------------------------------------------------------------------------------------------------------------------------------------------------------------------------------------------------------------------------------------------------------------|--|--|--|---------|---------|---------|---------|---------|----------------------------------------------------------------------------------------------------------------------------------------------------------------------------------------------------------------------------------------------------------|------------------------------------------------------------------------------------------------------------------------------------------------------------------------------------------------------|------------------------------------------------------------------------------------------------------------------------------------------------------------------------------------------------------------------------------------------------------------------------------------------------------------------|---------------------------------------------------------------------------------------------------------------------------------------------------------------------------------------------------------------------------------------------------------------------------------------------------------------------------------------------------------------------------------------|------------------------------------------------------------------------------------------------------------------------------------------------------------------------------------------------------------------------------------------------------------------------------------|--|--|
| Patient Safety — Systems-based Practice                                                                                                                                                                                                                                           |                                                                                                                                                                                                      |                                                                                                                                                                                                                                                                                                                                                                                                                                                                                                                                                                                                                                                                                                                                                                                                                                                                                                                                                                                                                                                                                                                                                                                                                                                                                                                                                                                                                                                                                                                                                                                                                        |                                                                                                                                                                                                                                                                                                                                                                                       |                                                                                                                                                                                                                                                                                    |  |  |  |         |         |         |         |         |                                                                                                                                                                                                                                                          |                                                                                                                                                                                                      |                                                                                                                                                                                                                                                                                                                  |                                                                                                                                                                                                                                                                                                                                                                                       |                                                                                                                                                                                                                                                                                    |  |  |
| Level 1                                                                                                                                                                                                                                                                           | Level 2                                                                                                                                                                                              | Level 3                                                                                                                                                                                                                                                                                                                                                                                                                                                                                                                                                                                                                                                                                                                                                                                                                                                                                                                                                                                                                                                                                                                                                                                                                                                                                                                                                                                                                                                                                                                                                                                                                | Level 4                                                                                                                                                                                                                                                                                                                                                                               | Level 5                                                                                                                                                                                                                                                                            |  |  |  |         |         |         |         |         |                                                                                                                                                                                                                                                          |                                                                                                                                                                                                      |                                                                                                                                                                                                                                                                                                                  |                                                                                                                                                                                                                                                                                                                                                                                       |                                                                                                                                                                                                                                                                                    |  |  |
| <ul style="list-style-type: none"> <li>Understands the differences between medical errors, near misses, and sentinel events</li> <li>Understands the roles of care team members</li> </ul>                                                                                        | <ul style="list-style-type: none"> <li>Participates in the use of tools to prevent adverse events (e.g., checklists and briefings)</li> <li>Describes the common system causes for errors</li> </ul> | <ul style="list-style-type: none"> <li>Consistently uses tools to prevent adverse events (e.g., checklists and briefings)</li> <li>Reports problematic behaviors, processes, and devices, including errors and near misses</li> </ul>                                                                                                                                                                                                                                                                                                                                                                                                                                                                                                                                                                                                                                                                                                                                                                                                                                                                                                                                                                                                                                                                                                                                                                                                                                                                                                                                                                                  | <ul style="list-style-type: none"> <li>Formally analyzes shared team experiences to prevent future errors using proven analysis techniques (e.g., root cause analysis, failure mode effects analysis)</li> <li>Leads team by promoting situational awareness and input by all team members</li> <li>Conducts morbidity and mortality conferences to improve patient safety</li> </ul> | <ul style="list-style-type: none"> <li>Leads curriculum design to teach teamwork and communication skills to health care professionals</li> <li>Helps lead a multidisciplinary team (e.g., human factors engineers, social scientists) to address patient safety issues</li> </ul> |  |  |  |         |         |         |         |         |                                                                                                                                                                                                                                                          |                                                                                                                                                                                                      |                                                                                                                                                                                                                                                                                                                  |                                                                                                                                                                                                                                                                                                                                                                                       |                                                                                                                                                                                                                                                                                    |  |  |
| <b>Plastic Surgery</b>                                                                                                                                                                                                                                                            | HC Costs<br>Resources                                                                                                                                                                                | <table border="1"> <thead> <tr> <th colspan="5">Resource Allocation — Systems-based Practice</th> </tr> <tr> <th>Level 1</th> <th>Level 2</th> <th>Level 3</th> <th>Level 4</th> <th>Level 5</th> </tr> </thead> <tbody> <tr> <td> <ul style="list-style-type: none"> <li>Describes practice variations in resource consumption, such as the utilization of diagnostic tests</li> </ul> </td> <td> <ul style="list-style-type: none"> <li>Describes the cost implications of using resources and practice variation</li> </ul> </td> <td> <ul style="list-style-type: none"> <li>Participates in responsible use of health care resources seeking appropriate assistance</li> </ul> </td> <td> <ul style="list-style-type: none"> <li>Practices cost-effective care (e.g., managing length of stay, operative efficiency)</li> </ul> </td> <td> <ul style="list-style-type: none"> <li>Designs measurement tools to monitor and provide feedback to providers/teams on resource consumption to facilitate improvement</li> </ul> </td> </tr> </tbody> </table>                                                                                                                                                                                                                                                                                                                                                                                                                                                                                                                                                         | Resource Allocation — Systems-based Practice                                                                                                                                                                                                                                                                                                                                          |                                                                                                                                                                                                                                                                                    |  |  |  | Level 1 | Level 2 | Level 3 | Level 4 | Level 5 | <ul style="list-style-type: none"> <li>Describes practice variations in resource consumption, such as the utilization of diagnostic tests</li> </ul>                                                                                                     | <ul style="list-style-type: none"> <li>Describes the cost implications of using resources and practice variation</li> </ul>                                                                          | <ul style="list-style-type: none"> <li>Participates in responsible use of health care resources seeking appropriate assistance</li> </ul>                                                                                                                                                                        | <ul style="list-style-type: none"> <li>Practices cost-effective care (e.g., managing length of stay, operative efficiency)</li> </ul>                                                                                                                                                                                                                                                 | <ul style="list-style-type: none"> <li>Designs measurement tools to monitor and provide feedback to providers/teams on resource consumption to facilitate improvement</li> </ul>                                                                                                   |  |  |
| Resource Allocation — Systems-based Practice                                                                                                                                                                                                                                      |                                                                                                                                                                                                      |                                                                                                                                                                                                                                                                                                                                                                                                                                                                                                                                                                                                                                                                                                                                                                                                                                                                                                                                                                                                                                                                                                                                                                                                                                                                                                                                                                                                                                                                                                                                                                                                                        |                                                                                                                                                                                                                                                                                                                                                                                       |                                                                                                                                                                                                                                                                                    |  |  |  |         |         |         |         |         |                                                                                                                                                                                                                                                          |                                                                                                                                                                                                      |                                                                                                                                                                                                                                                                                                                  |                                                                                                                                                                                                                                                                                                                                                                                       |                                                                                                                                                                                                                                                                                    |  |  |
| Level 1                                                                                                                                                                                                                                                                           | Level 2                                                                                                                                                                                              | Level 3                                                                                                                                                                                                                                                                                                                                                                                                                                                                                                                                                                                                                                                                                                                                                                                                                                                                                                                                                                                                                                                                                                                                                                                                                                                                                                                                                                                                                                                                                                                                                                                                                | Level 4                                                                                                                                                                                                                                                                                                                                                                               | Level 5                                                                                                                                                                                                                                                                            |  |  |  |         |         |         |         |         |                                                                                                                                                                                                                                                          |                                                                                                                                                                                                      |                                                                                                                                                                                                                                                                                                                  |                                                                                                                                                                                                                                                                                                                                                                                       |                                                                                                                                                                                                                                                                                    |  |  |
| <ul style="list-style-type: none"> <li>Describes practice variations in resource consumption, such as the utilization of diagnostic tests</li> </ul>                                                                                                                              | <ul style="list-style-type: none"> <li>Describes the cost implications of using resources and practice variation</li> </ul>                                                                          | <ul style="list-style-type: none"> <li>Participates in responsible use of health care resources seeking appropriate assistance</li> </ul>                                                                                                                                                                                                                                                                                                                                                                                                                                                                                                                                                                                                                                                                                                                                                                                                                                                                                                                                                                                                                                                                                                                                                                                                                                                                                                                                                                                                                                                                              | <ul style="list-style-type: none"> <li>Practices cost-effective care (e.g., managing length of stay, operative efficiency)</li> </ul>                                                                                                                                                                                                                                                 | <ul style="list-style-type: none"> <li>Designs measurement tools to monitor and provide feedback to providers/teams on resource consumption to facilitate improvement</li> </ul>                                                                                                   |  |  |  |         |         |         |         |         |                                                                                                                                                                                                                                                          |                                                                                                                                                                                                      |                                                                                                                                                                                                                                                                                                                  |                                                                                                                                                                                                                                                                                                                                                                                       |                                                                                                                                                                                                                                                                                    |  |  |
| <b>Plastic Surgery</b>                                                                                                                                                                                                                                                            | HC Systems                                                                                                                                                                                           | <table border="1"> <thead> <tr> <th colspan="5">Practice Management — Systems-based Practice</th> </tr> <tr> <th>Level 1</th> <th>Level 2</th> <th>Level 3</th> <th>Level 4</th> <th>Level 5</th> </tr> </thead> <tbody> <tr> <td> <ul style="list-style-type: none"> <li>Understands basic health payment systems, including uninsured care</li> <li>Understands different practice models</li> </ul> </td> <td> <ul style="list-style-type: none"> <li>Understands principles of diagnosis, evaluation and management, and procedure coding</li> <li>Compares and contrasts different practice models</li> </ul> </td> <td> <ul style="list-style-type: none"> <li>Codes routine diagnoses, encounters, and surgical procedures; documents medical necessity</li> <li>Recognizes basic elements needed to establish practice (e.g., negotiations, malpractice insurance, contracts, staffing, compliance, facility accreditation)</li> </ul> </td> <td> <ul style="list-style-type: none"> <li>Codes complex and unusual diagnoses, encounters, and surgical procedures</li> <li>Establishes timeline and identifies resources for transition to practice (e.g., information technology, legal, financial, personnel)</li> </ul> </td> <td> <ul style="list-style-type: none"> <li>Participates in advocacy activities for health policy</li> <li>Creates curriculum to teach practice management</li> </ul> </td> </tr> </tbody> </table>                                                                                                                                                                           | Practice Management — Systems-based Practice                                                                                                                                                                                                                                                                                                                                          |                                                                                                                                                                                                                                                                                    |  |  |  | Level 1 | Level 2 | Level 3 | Level 4 | Level 5 | <ul style="list-style-type: none"> <li>Understands basic health payment systems, including uninsured care</li> <li>Understands different practice models</li> </ul>                                                                                      | <ul style="list-style-type: none"> <li>Understands principles of diagnosis, evaluation and management, and procedure coding</li> <li>Compares and contrasts different practice models</li> </ul>     | <ul style="list-style-type: none"> <li>Codes routine diagnoses, encounters, and surgical procedures; documents medical necessity</li> <li>Recognizes basic elements needed to establish practice (e.g., negotiations, malpractice insurance, contracts, staffing, compliance, facility accreditation)</li> </ul> | <ul style="list-style-type: none"> <li>Codes complex and unusual diagnoses, encounters, and surgical procedures</li> <li>Establishes timeline and identifies resources for transition to practice (e.g., information technology, legal, financial, personnel)</li> </ul>                                                                                                              | <ul style="list-style-type: none"> <li>Participates in advocacy activities for health policy</li> <li>Creates curriculum to teach practice management</li> </ul>                                                                                                                   |  |  |
| Practice Management — Systems-based Practice                                                                                                                                                                                                                                      |                                                                                                                                                                                                      |                                                                                                                                                                                                                                                                                                                                                                                                                                                                                                                                                                                                                                                                                                                                                                                                                                                                                                                                                                                                                                                                                                                                                                                                                                                                                                                                                                                                                                                                                                                                                                                                                        |                                                                                                                                                                                                                                                                                                                                                                                       |                                                                                                                                                                                                                                                                                    |  |  |  |         |         |         |         |         |                                                                                                                                                                                                                                                          |                                                                                                                                                                                                      |                                                                                                                                                                                                                                                                                                                  |                                                                                                                                                                                                                                                                                                                                                                                       |                                                                                                                                                                                                                                                                                    |  |  |
| Level 1                                                                                                                                                                                                                                                                           | Level 2                                                                                                                                                                                              | Level 3                                                                                                                                                                                                                                                                                                                                                                                                                                                                                                                                                                                                                                                                                                                                                                                                                                                                                                                                                                                                                                                                                                                                                                                                                                                                                                                                                                                                                                                                                                                                                                                                                | Level 4                                                                                                                                                                                                                                                                                                                                                                               | Level 5                                                                                                                                                                                                                                                                            |  |  |  |         |         |         |         |         |                                                                                                                                                                                                                                                          |                                                                                                                                                                                                      |                                                                                                                                                                                                                                                                                                                  |                                                                                                                                                                                                                                                                                                                                                                                       |                                                                                                                                                                                                                                                                                    |  |  |
| <ul style="list-style-type: none"> <li>Understands basic health payment systems, including uninsured care</li> <li>Understands different practice models</li> </ul>                                                                                                               | <ul style="list-style-type: none"> <li>Understands principles of diagnosis, evaluation and management, and procedure coding</li> <li>Compares and contrasts different practice models</li> </ul>     | <ul style="list-style-type: none"> <li>Codes routine diagnoses, encounters, and surgical procedures; documents medical necessity</li> <li>Recognizes basic elements needed to establish practice (e.g., negotiations, malpractice insurance, contracts, staffing, compliance, facility accreditation)</li> </ul>                                                                                                                                                                                                                                                                                                                                                                                                                                                                                                                                                                                                                                                                                                                                                                                                                                                                                                                                                                                                                                                                                                                                                                                                                                                                                                       | <ul style="list-style-type: none"> <li>Codes complex and unusual diagnoses, encounters, and surgical procedures</li> <li>Establishes timeline and identifies resources for transition to practice (e.g., information technology, legal, financial, personnel)</li> </ul>                                                                                                              | <ul style="list-style-type: none"> <li>Participates in advocacy activities for health policy</li> <li>Creates curriculum to teach practice management</li> </ul>                                                                                                                   |  |  |  |         |         |         |         |         |                                                                                                                                                                                                                                                          |                                                                                                                                                                                                      |                                                                                                                                                                                                                                                                                                                  |                                                                                                                                                                                                                                                                                                                                                                                       |                                                                                                                                                                                                                                                                                    |  |  |
| <b>Preventive Medicine</b>                                                                                                                                                                                                                                                        | CC                                                                                                                                                                                                   | <table border="1"> <thead> <tr> <th colspan="5">Work and coordinate patient care effectively in various health care delivery settings and systems — Systems-based Practice 1</th> </tr> <tr> <th>Level 1</th> <th>Level 2</th> <th>Level 3</th> <th>Level 4</th> <th>Level 5</th> </tr> </thead> <tbody> <tr> <td> <ul style="list-style-type: none"> <li>Recognizes various individual and population-based health care/services delivery settings and systems</li> </ul> </td> <td> <ul style="list-style-type: none"> <li>Works and coordinates individual patient care in various health care delivery settings and systems</li> </ul> </td> <td> <ul style="list-style-type: none"> <li>Works and coordinates population-based health services in various health care delivery settings and systems</li> </ul> </td> <td> <ul style="list-style-type: none"> <li>Assess organizational performance of health care delivery system</li> </ul> </td> <td> <ul style="list-style-type: none"> <li>Interacts with other stakeholders to improve the performance of the system</li> </ul> </td> </tr> </tbody> </table>                                                                                                                                                                                                                                                                                                                                                                                                                                                                                                | Work and coordinate patient care effectively in various health care delivery settings and systems — Systems-based Practice 1                                                                                                                                                                                                                                                          |                                                                                                                                                                                                                                                                                    |  |  |  | Level 1 | Level 2 | Level 3 | Level 4 | Level 5 | <ul style="list-style-type: none"> <li>Recognizes various individual and population-based health care/services delivery settings and systems</li> </ul>                                                                                                  | <ul style="list-style-type: none"> <li>Works and coordinates individual patient care in various health care delivery settings and systems</li> </ul>                                                 | <ul style="list-style-type: none"> <li>Works and coordinates population-based health services in various health care delivery settings and systems</li> </ul>                                                                                                                                                    | <ul style="list-style-type: none"> <li>Assess organizational performance of health care delivery system</li> </ul>                                                                                                                                                                                                                                                                    | <ul style="list-style-type: none"> <li>Interacts with other stakeholders to improve the performance of the system</li> </ul>                                                                                                                                                       |  |  |
| Work and coordinate patient care effectively in various health care delivery settings and systems — Systems-based Practice 1                                                                                                                                                      |                                                                                                                                                                                                      |                                                                                                                                                                                                                                                                                                                                                                                                                                                                                                                                                                                                                                                                                                                                                                                                                                                                                                                                                                                                                                                                                                                                                                                                                                                                                                                                                                                                                                                                                                                                                                                                                        |                                                                                                                                                                                                                                                                                                                                                                                       |                                                                                                                                                                                                                                                                                    |  |  |  |         |         |         |         |         |                                                                                                                                                                                                                                                          |                                                                                                                                                                                                      |                                                                                                                                                                                                                                                                                                                  |                                                                                                                                                                                                                                                                                                                                                                                       |                                                                                                                                                                                                                                                                                    |  |  |
| Level 1                                                                                                                                                                                                                                                                           | Level 2                                                                                                                                                                                              | Level 3                                                                                                                                                                                                                                                                                                                                                                                                                                                                                                                                                                                                                                                                                                                                                                                                                                                                                                                                                                                                                                                                                                                                                                                                                                                                                                                                                                                                                                                                                                                                                                                                                | Level 4                                                                                                                                                                                                                                                                                                                                                                               | Level 5                                                                                                                                                                                                                                                                            |  |  |  |         |         |         |         |         |                                                                                                                                                                                                                                                          |                                                                                                                                                                                                      |                                                                                                                                                                                                                                                                                                                  |                                                                                                                                                                                                                                                                                                                                                                                       |                                                                                                                                                                                                                                                                                    |  |  |
| <ul style="list-style-type: none"> <li>Recognizes various individual and population-based health care/services delivery settings and systems</li> </ul>                                                                                                                           | <ul style="list-style-type: none"> <li>Works and coordinates individual patient care in various health care delivery settings and systems</li> </ul>                                                 | <ul style="list-style-type: none"> <li>Works and coordinates population-based health services in various health care delivery settings and systems</li> </ul>                                                                                                                                                                                                                                                                                                                                                                                                                                                                                                                                                                                                                                                                                                                                                                                                                                                                                                                                                                                                                                                                                                                                                                                                                                                                                                                                                                                                                                                          | <ul style="list-style-type: none"> <li>Assess organizational performance of health care delivery system</li> </ul>                                                                                                                                                                                                                                                                    | <ul style="list-style-type: none"> <li>Interacts with other stakeholders to improve the performance of the system</li> </ul>                                                                                                                                                       |  |  |  |         |         |         |         |         |                                                                                                                                                                                                                                                          |                                                                                                                                                                                                      |                                                                                                                                                                                                                                                                                                                  |                                                                                                                                                                                                                                                                                                                                                                                       |                                                                                                                                                                                                                                                                                    |  |  |
| <b>Preventive Medicine</b>                                                                                                                                                                                                                                                        | HC Costs and Risk                                                                                                                                                                                    | <table border="1"> <thead> <tr> <th colspan="5">Incorporate considerations of cost awareness and risk-benefit analysis in patient and/or population-based care, as appropriate — Systems-based Practice 2</th> </tr> <tr> <th>Level 1</th> <th>Level 2</th> <th>Level 3</th> <th>Level 4</th> <th>Level 5</th> </tr> </thead> <tbody> <tr> <td> <ul style="list-style-type: none"> <li>Recognizes the importance of cost awareness and risk-benefit analysis in patient and/or population-based care</li> </ul> </td> <td> <ul style="list-style-type: none"> <li>Identifies risks, benefits, and costs for a preventive service in an individual clinical patient</li> </ul> </td> <td> <ul style="list-style-type: none"> <li>Demonstrates sound judgment relating to risks, benefits, and costs for a preventive service in an individual clinical patient</li> </ul> </td> <td> <ul style="list-style-type: none"> <li>Demonstrates sound judgment relating to risks, benefits, and costs for a preventive service for a population</li> </ul> </td> <td> <ul style="list-style-type: none"> <li>Articulates and weighs the costs, benefits, and risks of a proposed population-based service</li> </ul> </td> </tr> </tbody> </table>                                                                                                                                                                                                                                                                                                                                                                             | Incorporate considerations of cost awareness and risk-benefit analysis in patient and/or population-based care, as appropriate — Systems-based Practice 2                                                                                                                                                                                                                             |                                                                                                                                                                                                                                                                                    |  |  |  | Level 1 | Level 2 | Level 3 | Level 4 | Level 5 | <ul style="list-style-type: none"> <li>Recognizes the importance of cost awareness and risk-benefit analysis in patient and/or population-based care</li> </ul>                                                                                          | <ul style="list-style-type: none"> <li>Identifies risks, benefits, and costs for a preventive service in an individual clinical patient</li> </ul>                                                   | <ul style="list-style-type: none"> <li>Demonstrates sound judgment relating to risks, benefits, and costs for a preventive service in an individual clinical patient</li> </ul>                                                                                                                                  | <ul style="list-style-type: none"> <li>Demonstrates sound judgment relating to risks, benefits, and costs for a preventive service for a population</li> </ul>                                                                                                                                                                                                                        | <ul style="list-style-type: none"> <li>Articulates and weighs the costs, benefits, and risks of a proposed population-based service</li> </ul>                                                                                                                                     |  |  |
| Incorporate considerations of cost awareness and risk-benefit analysis in patient and/or population-based care, as appropriate — Systems-based Practice 2                                                                                                                         |                                                                                                                                                                                                      |                                                                                                                                                                                                                                                                                                                                                                                                                                                                                                                                                                                                                                                                                                                                                                                                                                                                                                                                                                                                                                                                                                                                                                                                                                                                                                                                                                                                                                                                                                                                                                                                                        |                                                                                                                                                                                                                                                                                                                                                                                       |                                                                                                                                                                                                                                                                                    |  |  |  |         |         |         |         |         |                                                                                                                                                                                                                                                          |                                                                                                                                                                                                      |                                                                                                                                                                                                                                                                                                                  |                                                                                                                                                                                                                                                                                                                                                                                       |                                                                                                                                                                                                                                                                                    |  |  |
| Level 1                                                                                                                                                                                                                                                                           | Level 2                                                                                                                                                                                              | Level 3                                                                                                                                                                                                                                                                                                                                                                                                                                                                                                                                                                                                                                                                                                                                                                                                                                                                                                                                                                                                                                                                                                                                                                                                                                                                                                                                                                                                                                                                                                                                                                                                                | Level 4                                                                                                                                                                                                                                                                                                                                                                               | Level 5                                                                                                                                                                                                                                                                            |  |  |  |         |         |         |         |         |                                                                                                                                                                                                                                                          |                                                                                                                                                                                                      |                                                                                                                                                                                                                                                                                                                  |                                                                                                                                                                                                                                                                                                                                                                                       |                                                                                                                                                                                                                                                                                    |  |  |
| <ul style="list-style-type: none"> <li>Recognizes the importance of cost awareness and risk-benefit analysis in patient and/or population-based care</li> </ul>                                                                                                                   | <ul style="list-style-type: none"> <li>Identifies risks, benefits, and costs for a preventive service in an individual clinical patient</li> </ul>                                                   | <ul style="list-style-type: none"> <li>Demonstrates sound judgment relating to risks, benefits, and costs for a preventive service in an individual clinical patient</li> </ul>                                                                                                                                                                                                                                                                                                                                                                                                                                                                                                                                                                                                                                                                                                                                                                                                                                                                                                                                                                                                                                                                                                                                                                                                                                                                                                                                                                                                                                        | <ul style="list-style-type: none"> <li>Demonstrates sound judgment relating to risks, benefits, and costs for a preventive service for a population</li> </ul>                                                                                                                                                                                                                        | <ul style="list-style-type: none"> <li>Articulates and weighs the costs, benefits, and risks of a proposed population-based service</li> </ul>                                                                                                                                     |  |  |  |         |         |         |         |         |                                                                                                                                                                                                                                                          |                                                                                                                                                                                                      |                                                                                                                                                                                                                                                                                                                  |                                                                                                                                                                                                                                                                                                                                                                                       |                                                                                                                                                                                                                                                                                    |  |  |
| <b>Preventive Medicine</b>                                                                                                                                                                                                                                                        | PS<br>QI                                                                                                                                                                                             | <table border="1"> <thead> <tr> <th colspan="5">Work in inter-professional teams to enhance patient safety and improve patient care quality; advocate for quality patient care and optimal patient care systems; participate in identifying system errors and implementing potential systems solutions — Systems-based Practice 3</th> </tr> <tr> <th>Level 1</th> <th>Level 2</th> <th>Level 3</th> <th>Level 4</th> <th>Level 5</th> </tr> </thead> <tbody> <tr> <td> <ul style="list-style-type: none"> <li>Recognizes the importance of advocating for quality care and optimal patient care systems</li> <li>Recognizes that medical errors and health care system failures are a significant cause or morbidity</li> </ul> </td> <td> <ul style="list-style-type: none"> <li>Understands key concepts related to health care quality improvement</li> <li>Recognizes and reports errors and near misses</li> </ul> </td> <td> <ul style="list-style-type: none"> <li>Advocates for quality care and optimal individual patient care systems</li> <li>Recognizes potential sources of system failure in healthcare systems, such as minor, major, and sentinel events</li> </ul> </td> <td> <ul style="list-style-type: none"> <li>Advocates for quality care and optimal population-based care systems</li> <li>Participates in a team-based approach to make system changes</li> </ul> </td> <td> <ul style="list-style-type: none"> <li>Develops or leads a team to evaluate a system error and improve processes</li> </ul> </td> </tr> </tbody> </table>                                                     | Work in inter-professional teams to enhance patient safety and improve patient care quality; advocate for quality patient care and optimal patient care systems; participate in identifying system errors and implementing potential systems solutions — Systems-based Practice 3                                                                                                     |                                                                                                                                                                                                                                                                                    |  |  |  | Level 1 | Level 2 | Level 3 | Level 4 | Level 5 | <ul style="list-style-type: none"> <li>Recognizes the importance of advocating for quality care and optimal patient care systems</li> <li>Recognizes that medical errors and health care system failures are a significant cause or morbidity</li> </ul> | <ul style="list-style-type: none"> <li>Understands key concepts related to health care quality improvement</li> <li>Recognizes and reports errors and near misses</li> </ul>                         | <ul style="list-style-type: none"> <li>Advocates for quality care and optimal individual patient care systems</li> <li>Recognizes potential sources of system failure in healthcare systems, such as minor, major, and sentinel events</li> </ul>                                                                | <ul style="list-style-type: none"> <li>Advocates for quality care and optimal population-based care systems</li> <li>Participates in a team-based approach to make system changes</li> </ul>                                                                                                                                                                                          | <ul style="list-style-type: none"> <li>Develops or leads a team to evaluate a system error and improve processes</li> </ul>                                                                                                                                                        |  |  |
| Work in inter-professional teams to enhance patient safety and improve patient care quality; advocate for quality patient care and optimal patient care systems; participate in identifying system errors and implementing potential systems solutions — Systems-based Practice 3 |                                                                                                                                                                                                      |                                                                                                                                                                                                                                                                                                                                                                                                                                                                                                                                                                                                                                                                                                                                                                                                                                                                                                                                                                                                                                                                                                                                                                                                                                                                                                                                                                                                                                                                                                                                                                                                                        |                                                                                                                                                                                                                                                                                                                                                                                       |                                                                                                                                                                                                                                                                                    |  |  |  |         |         |         |         |         |                                                                                                                                                                                                                                                          |                                                                                                                                                                                                      |                                                                                                                                                                                                                                                                                                                  |                                                                                                                                                                                                                                                                                                                                                                                       |                                                                                                                                                                                                                                                                                    |  |  |
| Level 1                                                                                                                                                                                                                                                                           | Level 2                                                                                                                                                                                              | Level 3                                                                                                                                                                                                                                                                                                                                                                                                                                                                                                                                                                                                                                                                                                                                                                                                                                                                                                                                                                                                                                                                                                                                                                                                                                                                                                                                                                                                                                                                                                                                                                                                                | Level 4                                                                                                                                                                                                                                                                                                                                                                               | Level 5                                                                                                                                                                                                                                                                            |  |  |  |         |         |         |         |         |                                                                                                                                                                                                                                                          |                                                                                                                                                                                                      |                                                                                                                                                                                                                                                                                                                  |                                                                                                                                                                                                                                                                                                                                                                                       |                                                                                                                                                                                                                                                                                    |  |  |
| <ul style="list-style-type: none"> <li>Recognizes the importance of advocating for quality care and optimal patient care systems</li> <li>Recognizes that medical errors and health care system failures are a significant cause or morbidity</li> </ul>                          | <ul style="list-style-type: none"> <li>Understands key concepts related to health care quality improvement</li> <li>Recognizes and reports errors and near misses</li> </ul>                         | <ul style="list-style-type: none"> <li>Advocates for quality care and optimal individual patient care systems</li> <li>Recognizes potential sources of system failure in healthcare systems, such as minor, major, and sentinel events</li> </ul>                                                                                                                                                                                                                                                                                                                                                                                                                                                                                                                                                                                                                                                                                                                                                                                                                                                                                                                                                                                                                                                                                                                                                                                                                                                                                                                                                                      | <ul style="list-style-type: none"> <li>Advocates for quality care and optimal population-based care systems</li> <li>Participates in a team-based approach to make system changes</li> </ul>                                                                                                                                                                                          | <ul style="list-style-type: none"> <li>Develops or leads a team to evaluate a system error and improve processes</li> </ul>                                                                                                                                                        |  |  |  |         |         |         |         |         |                                                                                                                                                                                                                                                          |                                                                                                                                                                                                      |                                                                                                                                                                                                                                                                                                                  |                                                                                                                                                                                                                                                                                                                                                                                       |                                                                                                                                                                                                                                                                                    |  |  |

| <p><b>Psychiatry</b></p>                                                         | <p>PS</p>                                                                                                                                                                                             | <p><b>SBP1. Patient Safety and the Health care Team</b><br/> <b>A:</b> Medical errors and improvement activities<br/> <b>B:</b> Communication and patient safety<br/> <b>C:</b> Regulatory and educational activities related to patient safety</p> <table border="1"> <thead> <tr> <th>Has not Achieved Level 1</th> <th>Level 1</th> <th>Level 2</th> <th>Level 3</th> <th>Level 4</th> <th>Level 5</th> </tr> </thead> <tbody> <tr> <td></td> <td>1.1/A Differentiates among medical errors, near misses, and sentinel events</td> <td>2.1/A Describes the common system causes for errors</td> <td>3.1/A Describes systems and procedures that promote patient safety</td> <td>4.1/A Participates in formal analysis (e.g., root-cause analysis, failure mode effects analysis) of medical errors and sentinel events</td> <td>5.1/A Leads multidisciplinary teams (e.g., human factors engineers', social scientists) to address patient safety issues</td> </tr> <tr> <td></td> <td>1.2/B Recognizes failure in teamwork and communication as leading cause of preventable patient harm</td> <td>2.2/B Consistently uses structured communication tools to prevent adverse events (e.g., checklists, safe hand-off procedures, briefings)</td> <td></td> <td>4.2/C Develops content for and facilitates a patient safety presentation or conference focusing on systems-based errors in patient care (i.e., a morbidity and mortality [M&amp;M] conference)</td> <td>5.2/A, C Provides consultation to organizations to improve personal and patient safety</td> </tr> <tr> <td></td> <td>1.3/C Follows institutional safety policies, including reporting of problematic behaviors and processes, errors, and near misses</td> <td>2.3/C Actively participates in conferences focusing on systems-based errors in patient care</td> <td></td> <td></td> <td></td> </tr> </tbody> </table>                                                                                                                                                                                                                                                                                                                                 | Has not Achieved Level 1                                                                                                                                                       | Level 1                                                                                                                                                                                    | Level 2                                                                                                                              | Level 3 | Level 4 | Level 5 |  | 1.1/A Differentiates among medical errors, near misses, and sentinel events | 2.1/A Describes the common system causes for errors                                        | 3.1/A Describes systems and procedures that promote patient safety | 4.1/A Participates in formal analysis (e.g., root-cause analysis, failure mode effects analysis) of medical errors and sentinel events        | 5.1/A Leads multidisciplinary teams (e.g., human factors engineers', social scientists) to address patient safety issues             |  | 1.2/B Recognizes failure in teamwork and communication as leading cause of preventable patient harm                                                                                                   | 2.2/B Consistently uses structured communication tools to prevent adverse events (e.g., checklists, safe hand-off procedures, briefings)              |                                                                                   | 4.2/C Develops content for and facilitates a patient safety presentation or conference focusing on systems-based errors in patient care (i.e., a morbidity and mortality [M&M] conference) | 5.2/A, C Provides consultation to organizations to improve personal and patient safety |           | 1.3/C Follows institutional safety policies, including reporting of problematic behaviors and processes, errors, and near misses                                                                                                                                                                                                                                                                                                                                                                                                                                                                                                                                                                                                                                                                                                                                                                                                                                                                                                                                                                                                                                                                                                                                                                                                                                                                                                                                                                                                                                                                                                                                                                                                                                                                                                                                                                                                                                                                                                                                                                                      | 2.3/C Actively participates in conferences focusing on systems-based errors in patient care |                                                                                      |                                                                         |         | <p>PS<br/>QI</p> | <p><b>Systems-Based Practice 1: Patient Safety and Quality Improvement</b><br/> <b>A:</b> Analyzes patient safety events<br/> <b>B:</b> Appropriately discloses patient safety events<br/> <b>C:</b> Participates in quality improvement</p> <table border="1"> <thead> <tr> <th>Level 1</th> <th>Level 2</th> <th>Level 3</th> <th>Level 4</th> <th>Level 5</th> </tr> </thead> <tbody> <tr> <td>Demonstrates knowledge of common patient safety events</td> <td>Identifies system factors that lead to patient safety events</td> <td>Participates in analysis of patient safety events (simulated or actual)</td> <td>Conducts analysis of patient safety events and offers error prevention strategies (simulated or actual)</td> <td>Actively engages teams and processes to improve systems to prevent patient safety events</td> </tr> <tr> <td>Demonstrates knowledge of how to report patient safety events</td> <td>Reports patient safety events through institutional reporting systems (simulated or actual)</td> <td>Participates in disclosure of patient safety events to patients and families (simulated or actual)</td> <td>Discloses patient safety events to patients and families (simulated or actual)</td> <td>Role models or mentors others in the disclosure of patient safety events</td> </tr> <tr> <td>Demonstrates knowledge of basic quality improvement methodologies and metrics</td> <td>Describes local quality improvement initiatives (e.g., reduced restraint rates, falls risk, suicide rates)</td> <td>Participates in local quality improvement initiatives</td> <td>Demonstrates the skills required to identify, develop, implement, and analyze a quality improvement project</td> <td>Creates, implements, and assesses quality improvement initiatives at the institutional or community level</td> </tr> </tbody> </table> | Level 1                                                                                                                | Level 2                                                                                                                  | Level 3                                                                                                 | Level 4                                                                                              | Level 5                                                                          | Demonstrates knowledge of common patient safety events                                   | Identifies system factors that lead to patient safety events                             | Participates in analysis of patient safety events (simulated or actual)                                                                                                        | Conducts analysis of patient safety events and offers error prevention strategies (simulated or actual)               | Actively engages teams and processes to improve systems to prevent patient safety events | Demonstrates knowledge of how to report patient safety events                                       | Reports patient safety events through institutional reporting systems (simulated or actual)                                                                                                                                                                                                                                                                                                                                                                                                                                                                                                                                                                                                                                                                                                                                                                                                                                                                                                                                                                                                                                                                                                                                                                                                                                                                                                                                                                                                                                                                                                                                                                                                                                                                                                                                                                                                                      | Participates in disclosure of patient safety events to patients and families (simulated or actual) | Discloses patient safety events to patients and families (simulated or actual)              | Role models or mentors others in the disclosure of patient safety events | Demonstrates knowledge of basic quality improvement methodologies and metrics | Describes local quality improvement initiatives (e.g., reduced restraint rates, falls risk, suicide rates) | Participates in local quality improvement initiatives       | Demonstrates the skills required to identify, develop, implement, and analyze a quality improvement project  | Creates, implements, and assesses quality improvement initiatives at the institutional or community level |                                                                                                                                                  |                                                                                                                              |                                                                   |                                                              |                                                                                               |                                                                           |                                                                                           |                                                                          |                                                                                            |                                                                           |                                                                                                 |                                                            |
|----------------------------------------------------------------------------------|-------------------------------------------------------------------------------------------------------------------------------------------------------------------------------------------------------|----------------------------------------------------------------------------------------------------------------------------------------------------------------------------------------------------------------------------------------------------------------------------------------------------------------------------------------------------------------------------------------------------------------------------------------------------------------------------------------------------------------------------------------------------------------------------------------------------------------------------------------------------------------------------------------------------------------------------------------------------------------------------------------------------------------------------------------------------------------------------------------------------------------------------------------------------------------------------------------------------------------------------------------------------------------------------------------------------------------------------------------------------------------------------------------------------------------------------------------------------------------------------------------------------------------------------------------------------------------------------------------------------------------------------------------------------------------------------------------------------------------------------------------------------------------------------------------------------------------------------------------------------------------------------------------------------------------------------------------------------------------------------------------------------------------------------------------------------------------------------------------------------------------------------------------------------------------------------------------------------------------------------------------------------------------------------------------------------------------------------------------------------------------------------------------------------------------------------------|--------------------------------------------------------------------------------------------------------------------------------------------------------------------------------|--------------------------------------------------------------------------------------------------------------------------------------------------------------------------------------------|--------------------------------------------------------------------------------------------------------------------------------------|---------|---------|---------|--|-----------------------------------------------------------------------------|--------------------------------------------------------------------------------------------|--------------------------------------------------------------------|-----------------------------------------------------------------------------------------------------------------------------------------------|--------------------------------------------------------------------------------------------------------------------------------------|--|-------------------------------------------------------------------------------------------------------------------------------------------------------------------------------------------------------|-------------------------------------------------------------------------------------------------------------------------------------------------------|-----------------------------------------------------------------------------------|--------------------------------------------------------------------------------------------------------------------------------------------------------------------------------------------|----------------------------------------------------------------------------------------|-----------|-----------------------------------------------------------------------------------------------------------------------------------------------------------------------------------------------------------------------------------------------------------------------------------------------------------------------------------------------------------------------------------------------------------------------------------------------------------------------------------------------------------------------------------------------------------------------------------------------------------------------------------------------------------------------------------------------------------------------------------------------------------------------------------------------------------------------------------------------------------------------------------------------------------------------------------------------------------------------------------------------------------------------------------------------------------------------------------------------------------------------------------------------------------------------------------------------------------------------------------------------------------------------------------------------------------------------------------------------------------------------------------------------------------------------------------------------------------------------------------------------------------------------------------------------------------------------------------------------------------------------------------------------------------------------------------------------------------------------------------------------------------------------------------------------------------------------------------------------------------------------------------------------------------------------------------------------------------------------------------------------------------------------------------------------------------------------------------------------------------------------|---------------------------------------------------------------------------------------------|--------------------------------------------------------------------------------------|-------------------------------------------------------------------------|---------|------------------|---------------------------------------------------------------------------------------------------------------------------------------------------------------------------------------------------------------------------------------------------------------------------------------------------------------------------------------------------------------------------------------------------------------------------------------------------------------------------------------------------------------------------------------------------------------------------------------------------------------------------------------------------------------------------------------------------------------------------------------------------------------------------------------------------------------------------------------------------------------------------------------------------------------------------------------------------------------------------------------------------------------------------------------------------------------------------------------------------------------------------------------------------------------------------------------------------------------------------------------------------------------------------------------------------------------------------------------------------------------------------------------------------------------------------------------------------------------------------------------------------------------------------------------------------------------------------------------------------------------------------------------------------------------------------------------------------------------------------------------------------------------------------------------------------------------------------------------------------------------------------|------------------------------------------------------------------------------------------------------------------------|--------------------------------------------------------------------------------------------------------------------------|---------------------------------------------------------------------------------------------------------|------------------------------------------------------------------------------------------------------|----------------------------------------------------------------------------------|------------------------------------------------------------------------------------------|------------------------------------------------------------------------------------------|--------------------------------------------------------------------------------------------------------------------------------------------------------------------------------|-----------------------------------------------------------------------------------------------------------------------|------------------------------------------------------------------------------------------|-----------------------------------------------------------------------------------------------------|------------------------------------------------------------------------------------------------------------------------------------------------------------------------------------------------------------------------------------------------------------------------------------------------------------------------------------------------------------------------------------------------------------------------------------------------------------------------------------------------------------------------------------------------------------------------------------------------------------------------------------------------------------------------------------------------------------------------------------------------------------------------------------------------------------------------------------------------------------------------------------------------------------------------------------------------------------------------------------------------------------------------------------------------------------------------------------------------------------------------------------------------------------------------------------------------------------------------------------------------------------------------------------------------------------------------------------------------------------------------------------------------------------------------------------------------------------------------------------------------------------------------------------------------------------------------------------------------------------------------------------------------------------------------------------------------------------------------------------------------------------------------------------------------------------------------------------------------------------------------------------------------------------------|----------------------------------------------------------------------------------------------------|---------------------------------------------------------------------------------------------|--------------------------------------------------------------------------|-------------------------------------------------------------------------------|------------------------------------------------------------------------------------------------------------|-------------------------------------------------------------|--------------------------------------------------------------------------------------------------------------|-----------------------------------------------------------------------------------------------------------|--------------------------------------------------------------------------------------------------------------------------------------------------|------------------------------------------------------------------------------------------------------------------------------|-------------------------------------------------------------------|--------------------------------------------------------------|-----------------------------------------------------------------------------------------------|---------------------------------------------------------------------------|-------------------------------------------------------------------------------------------|--------------------------------------------------------------------------|--------------------------------------------------------------------------------------------|---------------------------------------------------------------------------|-------------------------------------------------------------------------------------------------|------------------------------------------------------------|
| Has not Achieved Level 1                                                         | Level 1                                                                                                                                                                                               | Level 2                                                                                                                                                                                                                                                                                                                                                                                                                                                                                                                                                                                                                                                                                                                                                                                                                                                                                                                                                                                                                                                                                                                                                                                                                                                                                                                                                                                                                                                                                                                                                                                                                                                                                                                                                                                                                                                                                                                                                                                                                                                                                                                                                                                                                          | Level 3                                                                                                                                                                        | Level 4                                                                                                                                                                                    | Level 5                                                                                                                              |         |         |         |  |                                                                             |                                                                                            |                                                                    |                                                                                                                                               |                                                                                                                                      |  |                                                                                                                                                                                                       |                                                                                                                                                       |                                                                                   |                                                                                                                                                                                            |                                                                                        |           |                                                                                                                                                                                                                                                                                                                                                                                                                                                                                                                                                                                                                                                                                                                                                                                                                                                                                                                                                                                                                                                                                                                                                                                                                                                                                                                                                                                                                                                                                                                                                                                                                                                                                                                                                                                                                                                                                                                                                                                                                                                                                                                       |                                                                                             |                                                                                      |                                                                         |         |                  |                                                                                                                                                                                                                                                                                                                                                                                                                                                                                                                                                                                                                                                                                                                                                                                                                                                                                                                                                                                                                                                                                                                                                                                                                                                                                                                                                                                                                                                                                                                                                                                                                                                                                                                                                                                                                                                                           |                                                                                                                        |                                                                                                                          |                                                                                                         |                                                                                                      |                                                                                  |                                                                                          |                                                                                          |                                                                                                                                                                                |                                                                                                                       |                                                                                          |                                                                                                     |                                                                                                                                                                                                                                                                                                                                                                                                                                                                                                                                                                                                                                                                                                                                                                                                                                                                                                                                                                                                                                                                                                                                                                                                                                                                                                                                                                                                                                                                                                                                                                                                                                                                                                                                                                                                                                                                                                                  |                                                                                                    |                                                                                             |                                                                          |                                                                               |                                                                                                            |                                                             |                                                                                                              |                                                                                                           |                                                                                                                                                  |                                                                                                                              |                                                                   |                                                              |                                                                                               |                                                                           |                                                                                           |                                                                          |                                                                                            |                                                                           |                                                                                                 |                                                            |
|                                                                                  | 1.1/A Differentiates among medical errors, near misses, and sentinel events                                                                                                                           | 2.1/A Describes the common system causes for errors                                                                                                                                                                                                                                                                                                                                                                                                                                                                                                                                                                                                                                                                                                                                                                                                                                                                                                                                                                                                                                                                                                                                                                                                                                                                                                                                                                                                                                                                                                                                                                                                                                                                                                                                                                                                                                                                                                                                                                                                                                                                                                                                                                              | 3.1/A Describes systems and procedures that promote patient safety                                                                                                             | 4.1/A Participates in formal analysis (e.g., root-cause analysis, failure mode effects analysis) of medical errors and sentinel events                                                     | 5.1/A Leads multidisciplinary teams (e.g., human factors engineers', social scientists) to address patient safety issues             |         |         |         |  |                                                                             |                                                                                            |                                                                    |                                                                                                                                               |                                                                                                                                      |  |                                                                                                                                                                                                       |                                                                                                                                                       |                                                                                   |                                                                                                                                                                                            |                                                                                        |           |                                                                                                                                                                                                                                                                                                                                                                                                                                                                                                                                                                                                                                                                                                                                                                                                                                                                                                                                                                                                                                                                                                                                                                                                                                                                                                                                                                                                                                                                                                                                                                                                                                                                                                                                                                                                                                                                                                                                                                                                                                                                                                                       |                                                                                             |                                                                                      |                                                                         |         |                  |                                                                                                                                                                                                                                                                                                                                                                                                                                                                                                                                                                                                                                                                                                                                                                                                                                                                                                                                                                                                                                                                                                                                                                                                                                                                                                                                                                                                                                                                                                                                                                                                                                                                                                                                                                                                                                                                           |                                                                                                                        |                                                                                                                          |                                                                                                         |                                                                                                      |                                                                                  |                                                                                          |                                                                                          |                                                                                                                                                                                |                                                                                                                       |                                                                                          |                                                                                                     |                                                                                                                                                                                                                                                                                                                                                                                                                                                                                                                                                                                                                                                                                                                                                                                                                                                                                                                                                                                                                                                                                                                                                                                                                                                                                                                                                                                                                                                                                                                                                                                                                                                                                                                                                                                                                                                                                                                  |                                                                                                    |                                                                                             |                                                                          |                                                                               |                                                                                                            |                                                             |                                                                                                              |                                                                                                           |                                                                                                                                                  |                                                                                                                              |                                                                   |                                                              |                                                                                               |                                                                           |                                                                                           |                                                                          |                                                                                            |                                                                           |                                                                                                 |                                                            |
|                                                                                  | 1.2/B Recognizes failure in teamwork and communication as leading cause of preventable patient harm                                                                                                   | 2.2/B Consistently uses structured communication tools to prevent adverse events (e.g., checklists, safe hand-off procedures, briefings)                                                                                                                                                                                                                                                                                                                                                                                                                                                                                                                                                                                                                                                                                                                                                                                                                                                                                                                                                                                                                                                                                                                                                                                                                                                                                                                                                                                                                                                                                                                                                                                                                                                                                                                                                                                                                                                                                                                                                                                                                                                                                         |                                                                                                                                                                                | 4.2/C Develops content for and facilitates a patient safety presentation or conference focusing on systems-based errors in patient care (i.e., a morbidity and mortality [M&M] conference) | 5.2/A, C Provides consultation to organizations to improve personal and patient safety                                               |         |         |         |  |                                                                             |                                                                                            |                                                                    |                                                                                                                                               |                                                                                                                                      |  |                                                                                                                                                                                                       |                                                                                                                                                       |                                                                                   |                                                                                                                                                                                            |                                                                                        |           |                                                                                                                                                                                                                                                                                                                                                                                                                                                                                                                                                                                                                                                                                                                                                                                                                                                                                                                                                                                                                                                                                                                                                                                                                                                                                                                                                                                                                                                                                                                                                                                                                                                                                                                                                                                                                                                                                                                                                                                                                                                                                                                       |                                                                                             |                                                                                      |                                                                         |         |                  |                                                                                                                                                                                                                                                                                                                                                                                                                                                                                                                                                                                                                                                                                                                                                                                                                                                                                                                                                                                                                                                                                                                                                                                                                                                                                                                                                                                                                                                                                                                                                                                                                                                                                                                                                                                                                                                                           |                                                                                                                        |                                                                                                                          |                                                                                                         |                                                                                                      |                                                                                  |                                                                                          |                                                                                          |                                                                                                                                                                                |                                                                                                                       |                                                                                          |                                                                                                     |                                                                                                                                                                                                                                                                                                                                                                                                                                                                                                                                                                                                                                                                                                                                                                                                                                                                                                                                                                                                                                                                                                                                                                                                                                                                                                                                                                                                                                                                                                                                                                                                                                                                                                                                                                                                                                                                                                                  |                                                                                                    |                                                                                             |                                                                          |                                                                               |                                                                                                            |                                                             |                                                                                                              |                                                                                                           |                                                                                                                                                  |                                                                                                                              |                                                                   |                                                              |                                                                                               |                                                                           |                                                                                           |                                                                          |                                                                                            |                                                                           |                                                                                                 |                                                            |
|                                                                                  | 1.3/C Follows institutional safety policies, including reporting of problematic behaviors and processes, errors, and near misses                                                                      | 2.3/C Actively participates in conferences focusing on systems-based errors in patient care                                                                                                                                                                                                                                                                                                                                                                                                                                                                                                                                                                                                                                                                                                                                                                                                                                                                                                                                                                                                                                                                                                                                                                                                                                                                                                                                                                                                                                                                                                                                                                                                                                                                                                                                                                                                                                                                                                                                                                                                                                                                                                                                      |                                                                                                                                                                                |                                                                                                                                                                                            |                                                                                                                                      |         |         |         |  |                                                                             |                                                                                            |                                                                    |                                                                                                                                               |                                                                                                                                      |  |                                                                                                                                                                                                       |                                                                                                                                                       |                                                                                   |                                                                                                                                                                                            |                                                                                        |           |                                                                                                                                                                                                                                                                                                                                                                                                                                                                                                                                                                                                                                                                                                                                                                                                                                                                                                                                                                                                                                                                                                                                                                                                                                                                                                                                                                                                                                                                                                                                                                                                                                                                                                                                                                                                                                                                                                                                                                                                                                                                                                                       |                                                                                             |                                                                                      |                                                                         |         |                  |                                                                                                                                                                                                                                                                                                                                                                                                                                                                                                                                                                                                                                                                                                                                                                                                                                                                                                                                                                                                                                                                                                                                                                                                                                                                                                                                                                                                                                                                                                                                                                                                                                                                                                                                                                                                                                                                           |                                                                                                                        |                                                                                                                          |                                                                                                         |                                                                                                      |                                                                                  |                                                                                          |                                                                                          |                                                                                                                                                                                |                                                                                                                       |                                                                                          |                                                                                                     |                                                                                                                                                                                                                                                                                                                                                                                                                                                                                                                                                                                                                                                                                                                                                                                                                                                                                                                                                                                                                                                                                                                                                                                                                                                                                                                                                                                                                                                                                                                                                                                                                                                                                                                                                                                                                                                                                                                  |                                                                                                    |                                                                                             |                                                                          |                                                                               |                                                                                                            |                                                             |                                                                                                              |                                                                                                           |                                                                                                                                                  |                                                                                                                              |                                                                   |                                                              |                                                                                               |                                                                           |                                                                                           |                                                                          |                                                                                            |                                                                           |                                                                                                 |                                                            |
| Level 1                                                                          | Level 2                                                                                                                                                                                               | Level 3                                                                                                                                                                                                                                                                                                                                                                                                                                                                                                                                                                                                                                                                                                                                                                                                                                                                                                                                                                                                                                                                                                                                                                                                                                                                                                                                                                                                                                                                                                                                                                                                                                                                                                                                                                                                                                                                                                                                                                                                                                                                                                                                                                                                                          | Level 4                                                                                                                                                                        | Level 5                                                                                                                                                                                    |                                                                                                                                      |         |         |         |  |                                                                             |                                                                                            |                                                                    |                                                                                                                                               |                                                                                                                                      |  |                                                                                                                                                                                                       |                                                                                                                                                       |                                                                                   |                                                                                                                                                                                            |                                                                                        |           |                                                                                                                                                                                                                                                                                                                                                                                                                                                                                                                                                                                                                                                                                                                                                                                                                                                                                                                                                                                                                                                                                                                                                                                                                                                                                                                                                                                                                                                                                                                                                                                                                                                                                                                                                                                                                                                                                                                                                                                                                                                                                                                       |                                                                                             |                                                                                      |                                                                         |         |                  |                                                                                                                                                                                                                                                                                                                                                                                                                                                                                                                                                                                                                                                                                                                                                                                                                                                                                                                                                                                                                                                                                                                                                                                                                                                                                                                                                                                                                                                                                                                                                                                                                                                                                                                                                                                                                                                                           |                                                                                                                        |                                                                                                                          |                                                                                                         |                                                                                                      |                                                                                  |                                                                                          |                                                                                          |                                                                                                                                                                                |                                                                                                                       |                                                                                          |                                                                                                     |                                                                                                                                                                                                                                                                                                                                                                                                                                                                                                                                                                                                                                                                                                                                                                                                                                                                                                                                                                                                                                                                                                                                                                                                                                                                                                                                                                                                                                                                                                                                                                                                                                                                                                                                                                                                                                                                                                                  |                                                                                                    |                                                                                             |                                                                          |                                                                               |                                                                                                            |                                                             |                                                                                                              |                                                                                                           |                                                                                                                                                  |                                                                                                                              |                                                                   |                                                              |                                                                                               |                                                                           |                                                                                           |                                                                          |                                                                                            |                                                                           |                                                                                                 |                                                            |
| Demonstrates knowledge of common patient safety events                           | Identifies system factors that lead to patient safety events                                                                                                                                          | Participates in analysis of patient safety events (simulated or actual)                                                                                                                                                                                                                                                                                                                                                                                                                                                                                                                                                                                                                                                                                                                                                                                                                                                                                                                                                                                                                                                                                                                                                                                                                                                                                                                                                                                                                                                                                                                                                                                                                                                                                                                                                                                                                                                                                                                                                                                                                                                                                                                                                          | Conducts analysis of patient safety events and offers error prevention strategies (simulated or actual)                                                                        | Actively engages teams and processes to improve systems to prevent patient safety events                                                                                                   |                                                                                                                                      |         |         |         |  |                                                                             |                                                                                            |                                                                    |                                                                                                                                               |                                                                                                                                      |  |                                                                                                                                                                                                       |                                                                                                                                                       |                                                                                   |                                                                                                                                                                                            |                                                                                        |           |                                                                                                                                                                                                                                                                                                                                                                                                                                                                                                                                                                                                                                                                                                                                                                                                                                                                                                                                                                                                                                                                                                                                                                                                                                                                                                                                                                                                                                                                                                                                                                                                                                                                                                                                                                                                                                                                                                                                                                                                                                                                                                                       |                                                                                             |                                                                                      |                                                                         |         |                  |                                                                                                                                                                                                                                                                                                                                                                                                                                                                                                                                                                                                                                                                                                                                                                                                                                                                                                                                                                                                                                                                                                                                                                                                                                                                                                                                                                                                                                                                                                                                                                                                                                                                                                                                                                                                                                                                           |                                                                                                                        |                                                                                                                          |                                                                                                         |                                                                                                      |                                                                                  |                                                                                          |                                                                                          |                                                                                                                                                                                |                                                                                                                       |                                                                                          |                                                                                                     |                                                                                                                                                                                                                                                                                                                                                                                                                                                                                                                                                                                                                                                                                                                                                                                                                                                                                                                                                                                                                                                                                                                                                                                                                                                                                                                                                                                                                                                                                                                                                                                                                                                                                                                                                                                                                                                                                                                  |                                                                                                    |                                                                                             |                                                                          |                                                                               |                                                                                                            |                                                             |                                                                                                              |                                                                                                           |                                                                                                                                                  |                                                                                                                              |                                                                   |                                                              |                                                                                               |                                                                           |                                                                                           |                                                                          |                                                                                            |                                                                           |                                                                                                 |                                                            |
| Demonstrates knowledge of how to report patient safety events                    | Reports patient safety events through institutional reporting systems (simulated or actual)                                                                                                           | Participates in disclosure of patient safety events to patients and families (simulated or actual)                                                                                                                                                                                                                                                                                                                                                                                                                                                                                                                                                                                                                                                                                                                                                                                                                                                                                                                                                                                                                                                                                                                                                                                                                                                                                                                                                                                                                                                                                                                                                                                                                                                                                                                                                                                                                                                                                                                                                                                                                                                                                                                               | Discloses patient safety events to patients and families (simulated or actual)                                                                                                 | Role models or mentors others in the disclosure of patient safety events                                                                                                                   |                                                                                                                                      |         |         |         |  |                                                                             |                                                                                            |                                                                    |                                                                                                                                               |                                                                                                                                      |  |                                                                                                                                                                                                       |                                                                                                                                                       |                                                                                   |                                                                                                                                                                                            |                                                                                        |           |                                                                                                                                                                                                                                                                                                                                                                                                                                                                                                                                                                                                                                                                                                                                                                                                                                                                                                                                                                                                                                                                                                                                                                                                                                                                                                                                                                                                                                                                                                                                                                                                                                                                                                                                                                                                                                                                                                                                                                                                                                                                                                                       |                                                                                             |                                                                                      |                                                                         |         |                  |                                                                                                                                                                                                                                                                                                                                                                                                                                                                                                                                                                                                                                                                                                                                                                                                                                                                                                                                                                                                                                                                                                                                                                                                                                                                                                                                                                                                                                                                                                                                                                                                                                                                                                                                                                                                                                                                           |                                                                                                                        |                                                                                                                          |                                                                                                         |                                                                                                      |                                                                                  |                                                                                          |                                                                                          |                                                                                                                                                                                |                                                                                                                       |                                                                                          |                                                                                                     |                                                                                                                                                                                                                                                                                                                                                                                                                                                                                                                                                                                                                                                                                                                                                                                                                                                                                                                                                                                                                                                                                                                                                                                                                                                                                                                                                                                                                                                                                                                                                                                                                                                                                                                                                                                                                                                                                                                  |                                                                                                    |                                                                                             |                                                                          |                                                                               |                                                                                                            |                                                             |                                                                                                              |                                                                                                           |                                                                                                                                                  |                                                                                                                              |                                                                   |                                                              |                                                                                               |                                                                           |                                                                                           |                                                                          |                                                                                            |                                                                           |                                                                                                 |                                                            |
| Demonstrates knowledge of basic quality improvement methodologies and metrics    | Describes local quality improvement initiatives (e.g., reduced restraint rates, falls risk, suicide rates)                                                                                            | Participates in local quality improvement initiatives                                                                                                                                                                                                                                                                                                                                                                                                                                                                                                                                                                                                                                                                                                                                                                                                                                                                                                                                                                                                                                                                                                                                                                                                                                                                                                                                                                                                                                                                                                                                                                                                                                                                                                                                                                                                                                                                                                                                                                                                                                                                                                                                                                            | Demonstrates the skills required to identify, develop, implement, and analyze a quality improvement project                                                                    | Creates, implements, and assesses quality improvement initiatives at the institutional or community level                                                                                  |                                                                                                                                      |         |         |         |  |                                                                             |                                                                                            |                                                                    |                                                                                                                                               |                                                                                                                                      |  |                                                                                                                                                                                                       |                                                                                                                                                       |                                                                                   |                                                                                                                                                                                            |                                                                                        |           |                                                                                                                                                                                                                                                                                                                                                                                                                                                                                                                                                                                                                                                                                                                                                                                                                                                                                                                                                                                                                                                                                                                                                                                                                                                                                                                                                                                                                                                                                                                                                                                                                                                                                                                                                                                                                                                                                                                                                                                                                                                                                                                       |                                                                                             |                                                                                      |                                                                         |         |                  |                                                                                                                                                                                                                                                                                                                                                                                                                                                                                                                                                                                                                                                                                                                                                                                                                                                                                                                                                                                                                                                                                                                                                                                                                                                                                                                                                                                                                                                                                                                                                                                                                                                                                                                                                                                                                                                                           |                                                                                                                        |                                                                                                                          |                                                                                                         |                                                                                                      |                                                                                  |                                                                                          |                                                                                          |                                                                                                                                                                                |                                                                                                                       |                                                                                          |                                                                                                     |                                                                                                                                                                                                                                                                                                                                                                                                                                                                                                                                                                                                                                                                                                                                                                                                                                                                                                                                                                                                                                                                                                                                                                                                                                                                                                                                                                                                                                                                                                                                                                                                                                                                                                                                                                                                                                                                                                                  |                                                                                                    |                                                                                             |                                                                          |                                                                               |                                                                                                            |                                                             |                                                                                                              |                                                                                                           |                                                                                                                                                  |                                                                                                                              |                                                                   |                                                              |                                                                                               |                                                                           |                                                                                           |                                                                          |                                                                                            |                                                                           |                                                                                                 |                                                            |
| <p><b>Psychiatry</b></p>                                                         | <p>HC Costs<br/>Resources</p>                                                                                                                                                                         | <p><b>SBP2. Resource Management (may include diagnostics, medications, level of care, other treatment providers, access to community assistance)</b><br/> <b>A:</b> Costs of care and resource management</p> <table border="1"> <thead> <tr> <th>Has not Achieved Level 1</th> <th>Level 1</th> <th>Level 2</th> <th>Level 3</th> <th>Level 4</th> <th>Level 5</th> </tr> </thead> <tbody> <tr> <td></td> <td>1.1/A Recognizes need for efficient and equitable use of resources</td> <td>2.1/A Recognizes disparities in health care at individual and community levels</td> <td>3.2/A Coordinates patient access to community and system resources</td> <td>4.1/A Practices cost-effective, high-value clinical care', using evidence-based tools and information technologies to support decision making</td> <td>5.1/A Designs measurement tools to monitor and provide feedback to providers/teams on resource consumption to facilitate improvement</td> </tr> <tr> <td></td> <td></td> <td>2.2/A Knows the relative cost of care (e.g., medication costs, diagnostic costs, level of care costs, procedure costs)</td> <td></td> <td>4.2/A Balances the best interests of the patient with the availability of resources</td> <td>5.2/A Advocates for improved access to and additional resources within systems of care</td> </tr> </tbody> </table>                                                                                                                                                                                                                                                                                                                                                                                                                                                                                                                                                                                                                                                                                                                                                                                                                                                                    | Has not Achieved Level 1                                                                                                                                                       | Level 1                                                                                                                                                                                    | Level 2                                                                                                                              | Level 3 | Level 4 | Level 5 |  | 1.1/A Recognizes need for efficient and equitable use of resources          | 2.1/A Recognizes disparities in health care at individual and community levels             | 3.2/A Coordinates patient access to community and system resources | 4.1/A Practices cost-effective, high-value clinical care', using evidence-based tools and information technologies to support decision making | 5.1/A Designs measurement tools to monitor and provide feedback to providers/teams on resource consumption to facilitate improvement |  |                                                                                                                                                                                                       | 2.2/A Knows the relative cost of care (e.g., medication costs, diagnostic costs, level of care costs, procedure costs)                                |                                                                                   | 4.2/A Balances the best interests of the patient with the availability of resources                                                                                                        | 5.2/A Advocates for improved access to and additional resources within systems of care | <p>CC</p> | <p><b>Systems-Based Practice 2: System Navigation for Patient-Centered Care</b><br/> <b>A:</b> Coordinates patient care<br/> <b>B:</b> Safely transitions care<br/> <b>C:</b> Population and community health needs</p> <table border="1"> <thead> <tr> <th>Level 1</th> <th>Level 2</th> <th>Level 3</th> <th>Level 4</th> <th>Level 5</th> </tr> </thead> <tbody> <tr> <td>Demonstrates knowledge of care coordination</td> <td>Coordinates care of patients in routine clinical situations effectively using the roles of the interprofessional teams</td> <td>Coordinates care of patients in complex clinical situations effectively using the roles of their interprofessional teams</td> <td>Role models effective coordination of patient-centered care among different disciplines and specialties</td> <td>Analyzes the process of care coordination and leads in the design and implementation of improvements</td> </tr> <tr> <td>Identifies key elements for safe and effective transitions of care and hand-offs</td> <td>Performs safe and effective transitions of care/hand-offs in routine clinical situations</td> <td>Performs safe and effective transitions of care/hand-offs in complex clinical situations</td> <td>Role models and serves as a patient advocate for safe and effective transitions of care/hand-offs within and across health care delivery systems including outpatient settings</td> <td>Improves quality of transitions of care within and across health care delivery systems to optimize patient outcomes</td> </tr> <tr> <td>Demonstrates knowledge of population and community health needs and disparities</td> <td>Identifies specific population and community health needs and inequities for their local population</td> <td>Uses local resources effectively to meet the needs of a patient population and community</td> <td>Participates in changing and adapting practice to provide for the needs of specific populations</td> <td>Leads innovations and advocates for populations and communities with health care inequities</td> </tr> </tbody> </table> | Level 1                                                                                     | Level 2                                                                              | Level 3                                                                 | Level 4 | Level 5          | Demonstrates knowledge of care coordination                                                                                                                                                                                                                                                                                                                                                                                                                                                                                                                                                                                                                                                                                                                                                                                                                                                                                                                                                                                                                                                                                                                                                                                                                                                                                                                                                                                                                                                                                                                                                                                                                                                                                                                                                                                                                               | Coordinates care of patients in routine clinical situations effectively using the roles of the interprofessional teams | Coordinates care of patients in complex clinical situations effectively using the roles of their interprofessional teams | Role models effective coordination of patient-centered care among different disciplines and specialties | Analyzes the process of care coordination and leads in the design and implementation of improvements | Identifies key elements for safe and effective transitions of care and hand-offs | Performs safe and effective transitions of care/hand-offs in routine clinical situations | Performs safe and effective transitions of care/hand-offs in complex clinical situations | Role models and serves as a patient advocate for safe and effective transitions of care/hand-offs within and across health care delivery systems including outpatient settings | Improves quality of transitions of care within and across health care delivery systems to optimize patient outcomes   | Demonstrates knowledge of population and community health needs and disparities          | Identifies specific population and community health needs and inequities for their local population | Uses local resources effectively to meet the needs of a patient population and community                                                                                                                                                                                                                                                                                                                                                                                                                                                                                                                                                                                                                                                                                                                                                                                                                                                                                                                                                                                                                                                                                                                                                                                                                                                                                                                                                                                                                                                                                                                                                                                                                                                                                                                                                                                                                         | Participates in changing and adapting practice to provide for the needs of specific populations    | Leads innovations and advocates for populations and communities with health care inequities |                                                                          |                                                                               |                                                                                                            |                                                             |                                                                                                              |                                                                                                           |                                                                                                                                                  |                                                                                                                              |                                                                   |                                                              |                                                                                               |                                                                           |                                                                                           |                                                                          |                                                                                            |                                                                           |                                                                                                 |                                                            |
| Has not Achieved Level 1                                                         | Level 1                                                                                                                                                                                               | Level 2                                                                                                                                                                                                                                                                                                                                                                                                                                                                                                                                                                                                                                                                                                                                                                                                                                                                                                                                                                                                                                                                                                                                                                                                                                                                                                                                                                                                                                                                                                                                                                                                                                                                                                                                                                                                                                                                                                                                                                                                                                                                                                                                                                                                                          | Level 3                                                                                                                                                                        | Level 4                                                                                                                                                                                    | Level 5                                                                                                                              |         |         |         |  |                                                                             |                                                                                            |                                                                    |                                                                                                                                               |                                                                                                                                      |  |                                                                                                                                                                                                       |                                                                                                                                                       |                                                                                   |                                                                                                                                                                                            |                                                                                        |           |                                                                                                                                                                                                                                                                                                                                                                                                                                                                                                                                                                                                                                                                                                                                                                                                                                                                                                                                                                                                                                                                                                                                                                                                                                                                                                                                                                                                                                                                                                                                                                                                                                                                                                                                                                                                                                                                                                                                                                                                                                                                                                                       |                                                                                             |                                                                                      |                                                                         |         |                  |                                                                                                                                                                                                                                                                                                                                                                                                                                                                                                                                                                                                                                                                                                                                                                                                                                                                                                                                                                                                                                                                                                                                                                                                                                                                                                                                                                                                                                                                                                                                                                                                                                                                                                                                                                                                                                                                           |                                                                                                                        |                                                                                                                          |                                                                                                         |                                                                                                      |                                                                                  |                                                                                          |                                                                                          |                                                                                                                                                                                |                                                                                                                       |                                                                                          |                                                                                                     |                                                                                                                                                                                                                                                                                                                                                                                                                                                                                                                                                                                                                                                                                                                                                                                                                                                                                                                                                                                                                                                                                                                                                                                                                                                                                                                                                                                                                                                                                                                                                                                                                                                                                                                                                                                                                                                                                                                  |                                                                                                    |                                                                                             |                                                                          |                                                                               |                                                                                                            |                                                             |                                                                                                              |                                                                                                           |                                                                                                                                                  |                                                                                                                              |                                                                   |                                                              |                                                                                               |                                                                           |                                                                                           |                                                                          |                                                                                            |                                                                           |                                                                                                 |                                                            |
|                                                                                  | 1.1/A Recognizes need for efficient and equitable use of resources                                                                                                                                    | 2.1/A Recognizes disparities in health care at individual and community levels                                                                                                                                                                                                                                                                                                                                                                                                                                                                                                                                                                                                                                                                                                                                                                                                                                                                                                                                                                                                                                                                                                                                                                                                                                                                                                                                                                                                                                                                                                                                                                                                                                                                                                                                                                                                                                                                                                                                                                                                                                                                                                                                                   | 3.2/A Coordinates patient access to community and system resources                                                                                                             | 4.1/A Practices cost-effective, high-value clinical care', using evidence-based tools and information technologies to support decision making                                              | 5.1/A Designs measurement tools to monitor and provide feedback to providers/teams on resource consumption to facilitate improvement |         |         |         |  |                                                                             |                                                                                            |                                                                    |                                                                                                                                               |                                                                                                                                      |  |                                                                                                                                                                                                       |                                                                                                                                                       |                                                                                   |                                                                                                                                                                                            |                                                                                        |           |                                                                                                                                                                                                                                                                                                                                                                                                                                                                                                                                                                                                                                                                                                                                                                                                                                                                                                                                                                                                                                                                                                                                                                                                                                                                                                                                                                                                                                                                                                                                                                                                                                                                                                                                                                                                                                                                                                                                                                                                                                                                                                                       |                                                                                             |                                                                                      |                                                                         |         |                  |                                                                                                                                                                                                                                                                                                                                                                                                                                                                                                                                                                                                                                                                                                                                                                                                                                                                                                                                                                                                                                                                                                                                                                                                                                                                                                                                                                                                                                                                                                                                                                                                                                                                                                                                                                                                                                                                           |                                                                                                                        |                                                                                                                          |                                                                                                         |                                                                                                      |                                                                                  |                                                                                          |                                                                                          |                                                                                                                                                                                |                                                                                                                       |                                                                                          |                                                                                                     |                                                                                                                                                                                                                                                                                                                                                                                                                                                                                                                                                                                                                                                                                                                                                                                                                                                                                                                                                                                                                                                                                                                                                                                                                                                                                                                                                                                                                                                                                                                                                                                                                                                                                                                                                                                                                                                                                                                  |                                                                                                    |                                                                                             |                                                                          |                                                                               |                                                                                                            |                                                             |                                                                                                              |                                                                                                           |                                                                                                                                                  |                                                                                                                              |                                                                   |                                                              |                                                                                               |                                                                           |                                                                                           |                                                                          |                                                                                            |                                                                           |                                                                                                 |                                                            |
|                                                                                  |                                                                                                                                                                                                       | 2.2/A Knows the relative cost of care (e.g., medication costs, diagnostic costs, level of care costs, procedure costs)                                                                                                                                                                                                                                                                                                                                                                                                                                                                                                                                                                                                                                                                                                                                                                                                                                                                                                                                                                                                                                                                                                                                                                                                                                                                                                                                                                                                                                                                                                                                                                                                                                                                                                                                                                                                                                                                                                                                                                                                                                                                                                           |                                                                                                                                                                                | 4.2/A Balances the best interests of the patient with the availability of resources                                                                                                        | 5.2/A Advocates for improved access to and additional resources within systems of care                                               |         |         |         |  |                                                                             |                                                                                            |                                                                    |                                                                                                                                               |                                                                                                                                      |  |                                                                                                                                                                                                       |                                                                                                                                                       |                                                                                   |                                                                                                                                                                                            |                                                                                        |           |                                                                                                                                                                                                                                                                                                                                                                                                                                                                                                                                                                                                                                                                                                                                                                                                                                                                                                                                                                                                                                                                                                                                                                                                                                                                                                                                                                                                                                                                                                                                                                                                                                                                                                                                                                                                                                                                                                                                                                                                                                                                                                                       |                                                                                             |                                                                                      |                                                                         |         |                  |                                                                                                                                                                                                                                                                                                                                                                                                                                                                                                                                                                                                                                                                                                                                                                                                                                                                                                                                                                                                                                                                                                                                                                                                                                                                                                                                                                                                                                                                                                                                                                                                                                                                                                                                                                                                                                                                           |                                                                                                                        |                                                                                                                          |                                                                                                         |                                                                                                      |                                                                                  |                                                                                          |                                                                                          |                                                                                                                                                                                |                                                                                                                       |                                                                                          |                                                                                                     |                                                                                                                                                                                                                                                                                                                                                                                                                                                                                                                                                                                                                                                                                                                                                                                                                                                                                                                                                                                                                                                                                                                                                                                                                                                                                                                                                                                                                                                                                                                                                                                                                                                                                                                                                                                                                                                                                                                  |                                                                                                    |                                                                                             |                                                                          |                                                                               |                                                                                                            |                                                             |                                                                                                              |                                                                                                           |                                                                                                                                                  |                                                                                                                              |                                                                   |                                                              |                                                                                               |                                                                           |                                                                                           |                                                                          |                                                                                            |                                                                           |                                                                                                 |                                                            |
| Level 1                                                                          | Level 2                                                                                                                                                                                               | Level 3                                                                                                                                                                                                                                                                                                                                                                                                                                                                                                                                                                                                                                                                                                                                                                                                                                                                                                                                                                                                                                                                                                                                                                                                                                                                                                                                                                                                                                                                                                                                                                                                                                                                                                                                                                                                                                                                                                                                                                                                                                                                                                                                                                                                                          | Level 4                                                                                                                                                                        | Level 5                                                                                                                                                                                    |                                                                                                                                      |         |         |         |  |                                                                             |                                                                                            |                                                                    |                                                                                                                                               |                                                                                                                                      |  |                                                                                                                                                                                                       |                                                                                                                                                       |                                                                                   |                                                                                                                                                                                            |                                                                                        |           |                                                                                                                                                                                                                                                                                                                                                                                                                                                                                                                                                                                                                                                                                                                                                                                                                                                                                                                                                                                                                                                                                                                                                                                                                                                                                                                                                                                                                                                                                                                                                                                                                                                                                                                                                                                                                                                                                                                                                                                                                                                                                                                       |                                                                                             |                                                                                      |                                                                         |         |                  |                                                                                                                                                                                                                                                                                                                                                                                                                                                                                                                                                                                                                                                                                                                                                                                                                                                                                                                                                                                                                                                                                                                                                                                                                                                                                                                                                                                                                                                                                                                                                                                                                                                                                                                                                                                                                                                                           |                                                                                                                        |                                                                                                                          |                                                                                                         |                                                                                                      |                                                                                  |                                                                                          |                                                                                          |                                                                                                                                                                                |                                                                                                                       |                                                                                          |                                                                                                     |                                                                                                                                                                                                                                                                                                                                                                                                                                                                                                                                                                                                                                                                                                                                                                                                                                                                                                                                                                                                                                                                                                                                                                                                                                                                                                                                                                                                                                                                                                                                                                                                                                                                                                                                                                                                                                                                                                                  |                                                                                                    |                                                                                             |                                                                          |                                                                               |                                                                                                            |                                                             |                                                                                                              |                                                                                                           |                                                                                                                                                  |                                                                                                                              |                                                                   |                                                              |                                                                                               |                                                                           |                                                                                           |                                                                          |                                                                                            |                                                                           |                                                                                                 |                                                            |
| Demonstrates knowledge of care coordination                                      | Coordinates care of patients in routine clinical situations effectively using the roles of the interprofessional teams                                                                                | Coordinates care of patients in complex clinical situations effectively using the roles of their interprofessional teams                                                                                                                                                                                                                                                                                                                                                                                                                                                                                                                                                                                                                                                                                                                                                                                                                                                                                                                                                                                                                                                                                                                                                                                                                                                                                                                                                                                                                                                                                                                                                                                                                                                                                                                                                                                                                                                                                                                                                                                                                                                                                                         | Role models effective coordination of patient-centered care among different disciplines and specialties                                                                        | Analyzes the process of care coordination and leads in the design and implementation of improvements                                                                                       |                                                                                                                                      |         |         |         |  |                                                                             |                                                                                            |                                                                    |                                                                                                                                               |                                                                                                                                      |  |                                                                                                                                                                                                       |                                                                                                                                                       |                                                                                   |                                                                                                                                                                                            |                                                                                        |           |                                                                                                                                                                                                                                                                                                                                                                                                                                                                                                                                                                                                                                                                                                                                                                                                                                                                                                                                                                                                                                                                                                                                                                                                                                                                                                                                                                                                                                                                                                                                                                                                                                                                                                                                                                                                                                                                                                                                                                                                                                                                                                                       |                                                                                             |                                                                                      |                                                                         |         |                  |                                                                                                                                                                                                                                                                                                                                                                                                                                                                                                                                                                                                                                                                                                                                                                                                                                                                                                                                                                                                                                                                                                                                                                                                                                                                                                                                                                                                                                                                                                                                                                                                                                                                                                                                                                                                                                                                           |                                                                                                                        |                                                                                                                          |                                                                                                         |                                                                                                      |                                                                                  |                                                                                          |                                                                                          |                                                                                                                                                                                |                                                                                                                       |                                                                                          |                                                                                                     |                                                                                                                                                                                                                                                                                                                                                                                                                                                                                                                                                                                                                                                                                                                                                                                                                                                                                                                                                                                                                                                                                                                                                                                                                                                                                                                                                                                                                                                                                                                                                                                                                                                                                                                                                                                                                                                                                                                  |                                                                                                    |                                                                                             |                                                                          |                                                                               |                                                                                                            |                                                             |                                                                                                              |                                                                                                           |                                                                                                                                                  |                                                                                                                              |                                                                   |                                                              |                                                                                               |                                                                           |                                                                                           |                                                                          |                                                                                            |                                                                           |                                                                                                 |                                                            |
| Identifies key elements for safe and effective transitions of care and hand-offs | Performs safe and effective transitions of care/hand-offs in routine clinical situations                                                                                                              | Performs safe and effective transitions of care/hand-offs in complex clinical situations                                                                                                                                                                                                                                                                                                                                                                                                                                                                                                                                                                                                                                                                                                                                                                                                                                                                                                                                                                                                                                                                                                                                                                                                                                                                                                                                                                                                                                                                                                                                                                                                                                                                                                                                                                                                                                                                                                                                                                                                                                                                                                                                         | Role models and serves as a patient advocate for safe and effective transitions of care/hand-offs within and across health care delivery systems including outpatient settings | Improves quality of transitions of care within and across health care delivery systems to optimize patient outcomes                                                                        |                                                                                                                                      |         |         |         |  |                                                                             |                                                                                            |                                                                    |                                                                                                                                               |                                                                                                                                      |  |                                                                                                                                                                                                       |                                                                                                                                                       |                                                                                   |                                                                                                                                                                                            |                                                                                        |           |                                                                                                                                                                                                                                                                                                                                                                                                                                                                                                                                                                                                                                                                                                                                                                                                                                                                                                                                                                                                                                                                                                                                                                                                                                                                                                                                                                                                                                                                                                                                                                                                                                                                                                                                                                                                                                                                                                                                                                                                                                                                                                                       |                                                                                             |                                                                                      |                                                                         |         |                  |                                                                                                                                                                                                                                                                                                                                                                                                                                                                                                                                                                                                                                                                                                                                                                                                                                                                                                                                                                                                                                                                                                                                                                                                                                                                                                                                                                                                                                                                                                                                                                                                                                                                                                                                                                                                                                                                           |                                                                                                                        |                                                                                                                          |                                                                                                         |                                                                                                      |                                                                                  |                                                                                          |                                                                                          |                                                                                                                                                                                |                                                                                                                       |                                                                                          |                                                                                                     |                                                                                                                                                                                                                                                                                                                                                                                                                                                                                                                                                                                                                                                                                                                                                                                                                                                                                                                                                                                                                                                                                                                                                                                                                                                                                                                                                                                                                                                                                                                                                                                                                                                                                                                                                                                                                                                                                                                  |                                                                                                    |                                                                                             |                                                                          |                                                                               |                                                                                                            |                                                             |                                                                                                              |                                                                                                           |                                                                                                                                                  |                                                                                                                              |                                                                   |                                                              |                                                                                               |                                                                           |                                                                                           |                                                                          |                                                                                            |                                                                           |                                                                                                 |                                                            |
| Demonstrates knowledge of population and community health needs and disparities  | Identifies specific population and community health needs and inequities for their local population                                                                                                   | Uses local resources effectively to meet the needs of a patient population and community                                                                                                                                                                                                                                                                                                                                                                                                                                                                                                                                                                                                                                                                                                                                                                                                                                                                                                                                                                                                                                                                                                                                                                                                                                                                                                                                                                                                                                                                                                                                                                                                                                                                                                                                                                                                                                                                                                                                                                                                                                                                                                                                         | Participates in changing and adapting practice to provide for the needs of specific populations                                                                                | Leads innovations and advocates for populations and communities with health care inequities                                                                                                |                                                                                                                                      |         |         |         |  |                                                                             |                                                                                            |                                                                    |                                                                                                                                               |                                                                                                                                      |  |                                                                                                                                                                                                       |                                                                                                                                                       |                                                                                   |                                                                                                                                                                                            |                                                                                        |           |                                                                                                                                                                                                                                                                                                                                                                                                                                                                                                                                                                                                                                                                                                                                                                                                                                                                                                                                                                                                                                                                                                                                                                                                                                                                                                                                                                                                                                                                                                                                                                                                                                                                                                                                                                                                                                                                                                                                                                                                                                                                                                                       |                                                                                             |                                                                                      |                                                                         |         |                  |                                                                                                                                                                                                                                                                                                                                                                                                                                                                                                                                                                                                                                                                                                                                                                                                                                                                                                                                                                                                                                                                                                                                                                                                                                                                                                                                                                                                                                                                                                                                                                                                                                                                                                                                                                                                                                                                           |                                                                                                                        |                                                                                                                          |                                                                                                         |                                                                                                      |                                                                                  |                                                                                          |                                                                                          |                                                                                                                                                                                |                                                                                                                       |                                                                                          |                                                                                                     |                                                                                                                                                                                                                                                                                                                                                                                                                                                                                                                                                                                                                                                                                                                                                                                                                                                                                                                                                                                                                                                                                                                                                                                                                                                                                                                                                                                                                                                                                                                                                                                                                                                                                                                                                                                                                                                                                                                  |                                                                                                    |                                                                                             |                                                                          |                                                                               |                                                                                                            |                                                             |                                                                                                              |                                                                                                           |                                                                                                                                                  |                                                                                                                              |                                                                   |                                                              |                                                                                               |                                                                           |                                                                                           |                                                                          |                                                                                            |                                                                           |                                                                                                 |                                                            |
| <p><b>Psychiatry</b></p>                                                         | <p>CC</p>                                                                                                                                                                                             | <p><b>SBP3. Community-Based Care</b><br/> <b>A:</b> Community-based programs<br/> <b>B:</b> Self-help groups<br/> <b>C:</b> Prevention<br/> <b>D:</b> Recovery and rehabilitation</p> <table border="1"> <thead> <tr> <th>Has not Achieved Level 1</th> <th>Level 1</th> <th>Level 2</th> <th>Level 3</th> <th>Level 4</th> <th>Level 5</th> </tr> </thead> <tbody> <tr> <td></td> <td>1.1/A Gives examples of community mental health systems of care</td> <td>2.1/A Coordinates care with community mental health agencies, including with case managers</td> <td></td> <td></td> <td>5.1/A Participates in the administration of community-based treatment programs</td> </tr> <tr> <td></td> <td>1.2/B Gives examples of self-help groups (Alcoholics Anonymous [AA], Narcotics Anonymous [NA]), other community resources (church, school) and social networks (e.g., family, friends, acquaintances)</td> <td>2.2/B Recognizes role and explains importance of self-help groups and community resource groups (e.g., disorder-specific support and advocacy groups)</td> <td>3.1/B Incorporates disorder-specific support and advocacy groups in clinical care</td> <td>4.1/B Routinely uses self-help groups, community resources, and social networks in treatment<sup>1</sup></td> <td>5.2/A Participates in creating new community-based programs</td> </tr> <tr> <td></td> <td></td> <td>2.3/C Describes individual and population risk factors for mental illness</td> <td>3.2/C Describes prevention measures: universal, selective and indicated<sup>2</sup></td> <td>4.2/C Employs prevention and risk reduction strategies in clinical care</td> <td></td> </tr> <tr> <td></td> <td></td> <td></td> <td>3.3/D Describes rehabilitation programs (vocational, brain injury, etc.) and the recovery model<sup>3</sup></td> <td>4.3/D Appropriately refers to rehabilitation and recovery programs</td> <td>5.3/D Practices effectively, in a rehabilitation and/or recovery-based program</td> </tr> <tr> <td></td> <td></td> <td></td> <td></td> <td>4.4/D Uses principles of evidence-based practice and patient centered care in management of chronically ill patients.</td> <td></td> </tr> </tbody> </table> | Has not Achieved Level 1                                                                                                                                                       | Level 1                                                                                                                                                                                    | Level 2                                                                                                                              | Level 3 | Level 4 | Level 5 |  | 1.1/A Gives examples of community mental health systems of care             | 2.1/A Coordinates care with community mental health agencies, including with case managers |                                                                    |                                                                                                                                               | 5.1/A Participates in the administration of community-based treatment programs                                                       |  | 1.2/B Gives examples of self-help groups (Alcoholics Anonymous [AA], Narcotics Anonymous [NA]), other community resources (church, school) and social networks (e.g., family, friends, acquaintances) | 2.2/B Recognizes role and explains importance of self-help groups and community resource groups (e.g., disorder-specific support and advocacy groups) | 3.1/B Incorporates disorder-specific support and advocacy groups in clinical care | 4.1/B Routinely uses self-help groups, community resources, and social networks in treatment <sup>1</sup>                                                                                  | 5.2/A Participates in creating new community-based programs                            |           |                                                                                                                                                                                                                                                                                                                                                                                                                                                                                                                                                                                                                                                                                                                                                                                                                                                                                                                                                                                                                                                                                                                                                                                                                                                                                                                                                                                                                                                                                                                                                                                                                                                                                                                                                                                                                                                                                                                                                                                                                                                                                                                       | 2.3/C Describes individual and population risk factors for mental illness                   | 3.2/C Describes prevention measures: universal, selective and indicated <sup>2</sup> | 4.2/C Employs prevention and risk reduction strategies in clinical care |         |                  |                                                                                                                                                                                                                                                                                                                                                                                                                                                                                                                                                                                                                                                                                                                                                                                                                                                                                                                                                                                                                                                                                                                                                                                                                                                                                                                                                                                                                                                                                                                                                                                                                                                                                                                                                                                                                                                                           |                                                                                                                        | 3.3/D Describes rehabilitation programs (vocational, brain injury, etc.) and the recovery model <sup>3</sup>             | 4.3/D Appropriately refers to rehabilitation and recovery programs                                      | 5.3/D Practices effectively, in a rehabilitation and/or recovery-based program                       |                                                                                  |                                                                                          |                                                                                          |                                                                                                                                                                                | 4.4/D Uses principles of evidence-based practice and patient centered care in management of chronically ill patients. |                                                                                          | <p>HC Systems</p>                                                                                   | <p><b>Systems-Based Practice 3: Physician Role in Health Care Systems</b><br/> <b>A:</b> Understanding and working within the health care system<br/> <b>B:</b> Health care financing and advocacy<br/> <b>C:</b> Transition to practice</p> <table border="1"> <thead> <tr> <th>Level 1</th> <th>Level 2</th> <th>Level 3</th> <th>Level 4</th> <th>Level 5</th> </tr> </thead> <tbody> <tr> <td>Identifies key components of the complex health care system</td> <td>Describes how components of a complex health care system are interrelated, and how this impacts patient care</td> <td>Discusses how individual practice affects the broader system</td> <td>Manages various components of the complex health care system to provide high-value, efficient, and effective patient care and transition of care</td> <td>Advocates for or leads systems change that enhances high-value, efficient, and effective patient care and transition of care</td> </tr> <tr> <td>Describes practice models and basic mental health payment systems</td> <td>Identifies barriers to care in different health care systems</td> <td>Engages with patients in shared decision making and advocates for appropriate care and parity</td> <td>Advocates for patient care needs including mobilizing community resources</td> <td>Participates in advocacy activities for access to care in mental health and reimbursement</td> </tr> <tr> <td>Identifies basic knowledge domains for effective transition to residency</td> <td>Demonstrates use of information technology and documentation required for medical practice</td> <td>Describes core administrative knowledge needed for transition to practice</td> <td>Analyzes individual practice patterns and professional requirements in preparation for practice</td> <td>Educates others to prepare them for transition to practice</td> </tr> </tbody> </table> | Level 1                                                                                            | Level 2                                                                                     | Level 3                                                                  | Level 4                                                                       | Level 5                                                                                                    | Identifies key components of the complex health care system | Describes how components of a complex health care system are interrelated, and how this impacts patient care | Discusses how individual practice affects the broader system                                              | Manages various components of the complex health care system to provide high-value, efficient, and effective patient care and transition of care | Advocates for or leads systems change that enhances high-value, efficient, and effective patient care and transition of care | Describes practice models and basic mental health payment systems | Identifies barriers to care in different health care systems | Engages with patients in shared decision making and advocates for appropriate care and parity | Advocates for patient care needs including mobilizing community resources | Participates in advocacy activities for access to care in mental health and reimbursement | Identifies basic knowledge domains for effective transition to residency | Demonstrates use of information technology and documentation required for medical practice | Describes core administrative knowledge needed for transition to practice | Analyzes individual practice patterns and professional requirements in preparation for practice | Educates others to prepare them for transition to practice |
| Has not Achieved Level 1                                                         | Level 1                                                                                                                                                                                               | Level 2                                                                                                                                                                                                                                                                                                                                                                                                                                                                                                                                                                                                                                                                                                                                                                                                                                                                                                                                                                                                                                                                                                                                                                                                                                                                                                                                                                                                                                                                                                                                                                                                                                                                                                                                                                                                                                                                                                                                                                                                                                                                                                                                                                                                                          | Level 3                                                                                                                                                                        | Level 4                                                                                                                                                                                    | Level 5                                                                                                                              |         |         |         |  |                                                                             |                                                                                            |                                                                    |                                                                                                                                               |                                                                                                                                      |  |                                                                                                                                                                                                       |                                                                                                                                                       |                                                                                   |                                                                                                                                                                                            |                                                                                        |           |                                                                                                                                                                                                                                                                                                                                                                                                                                                                                                                                                                                                                                                                                                                                                                                                                                                                                                                                                                                                                                                                                                                                                                                                                                                                                                                                                                                                                                                                                                                                                                                                                                                                                                                                                                                                                                                                                                                                                                                                                                                                                                                       |                                                                                             |                                                                                      |                                                                         |         |                  |                                                                                                                                                                                                                                                                                                                                                                                                                                                                                                                                                                                                                                                                                                                                                                                                                                                                                                                                                                                                                                                                                                                                                                                                                                                                                                                                                                                                                                                                                                                                                                                                                                                                                                                                                                                                                                                                           |                                                                                                                        |                                                                                                                          |                                                                                                         |                                                                                                      |                                                                                  |                                                                                          |                                                                                          |                                                                                                                                                                                |                                                                                                                       |                                                                                          |                                                                                                     |                                                                                                                                                                                                                                                                                                                                                                                                                                                                                                                                                                                                                                                                                                                                                                                                                                                                                                                                                                                                                                                                                                                                                                                                                                                                                                                                                                                                                                                                                                                                                                                                                                                                                                                                                                                                                                                                                                                  |                                                                                                    |                                                                                             |                                                                          |                                                                               |                                                                                                            |                                                             |                                                                                                              |                                                                                                           |                                                                                                                                                  |                                                                                                                              |                                                                   |                                                              |                                                                                               |                                                                           |                                                                                           |                                                                          |                                                                                            |                                                                           |                                                                                                 |                                                            |
|                                                                                  | 1.1/A Gives examples of community mental health systems of care                                                                                                                                       | 2.1/A Coordinates care with community mental health agencies, including with case managers                                                                                                                                                                                                                                                                                                                                                                                                                                                                                                                                                                                                                                                                                                                                                                                                                                                                                                                                                                                                                                                                                                                                                                                                                                                                                                                                                                                                                                                                                                                                                                                                                                                                                                                                                                                                                                                                                                                                                                                                                                                                                                                                       |                                                                                                                                                                                |                                                                                                                                                                                            | 5.1/A Participates in the administration of community-based treatment programs                                                       |         |         |         |  |                                                                             |                                                                                            |                                                                    |                                                                                                                                               |                                                                                                                                      |  |                                                                                                                                                                                                       |                                                                                                                                                       |                                                                                   |                                                                                                                                                                                            |                                                                                        |           |                                                                                                                                                                                                                                                                                                                                                                                                                                                                                                                                                                                                                                                                                                                                                                                                                                                                                                                                                                                                                                                                                                                                                                                                                                                                                                                                                                                                                                                                                                                                                                                                                                                                                                                                                                                                                                                                                                                                                                                                                                                                                                                       |                                                                                             |                                                                                      |                                                                         |         |                  |                                                                                                                                                                                                                                                                                                                                                                                                                                                                                                                                                                                                                                                                                                                                                                                                                                                                                                                                                                                                                                                                                                                                                                                                                                                                                                                                                                                                                                                                                                                                                                                                                                                                                                                                                                                                                                                                           |                                                                                                                        |                                                                                                                          |                                                                                                         |                                                                                                      |                                                                                  |                                                                                          |                                                                                          |                                                                                                                                                                                |                                                                                                                       |                                                                                          |                                                                                                     |                                                                                                                                                                                                                                                                                                                                                                                                                                                                                                                                                                                                                                                                                                                                                                                                                                                                                                                                                                                                                                                                                                                                                                                                                                                                                                                                                                                                                                                                                                                                                                                                                                                                                                                                                                                                                                                                                                                  |                                                                                                    |                                                                                             |                                                                          |                                                                               |                                                                                                            |                                                             |                                                                                                              |                                                                                                           |                                                                                                                                                  |                                                                                                                              |                                                                   |                                                              |                                                                                               |                                                                           |                                                                                           |                                                                          |                                                                                            |                                                                           |                                                                                                 |                                                            |
|                                                                                  | 1.2/B Gives examples of self-help groups (Alcoholics Anonymous [AA], Narcotics Anonymous [NA]), other community resources (church, school) and social networks (e.g., family, friends, acquaintances) | 2.2/B Recognizes role and explains importance of self-help groups and community resource groups (e.g., disorder-specific support and advocacy groups)                                                                                                                                                                                                                                                                                                                                                                                                                                                                                                                                                                                                                                                                                                                                                                                                                                                                                                                                                                                                                                                                                                                                                                                                                                                                                                                                                                                                                                                                                                                                                                                                                                                                                                                                                                                                                                                                                                                                                                                                                                                                            | 3.1/B Incorporates disorder-specific support and advocacy groups in clinical care                                                                                              | 4.1/B Routinely uses self-help groups, community resources, and social networks in treatment <sup>1</sup>                                                                                  | 5.2/A Participates in creating new community-based programs                                                                          |         |         |         |  |                                                                             |                                                                                            |                                                                    |                                                                                                                                               |                                                                                                                                      |  |                                                                                                                                                                                                       |                                                                                                                                                       |                                                                                   |                                                                                                                                                                                            |                                                                                        |           |                                                                                                                                                                                                                                                                                                                                                                                                                                                                                                                                                                                                                                                                                                                                                                                                                                                                                                                                                                                                                                                                                                                                                                                                                                                                                                                                                                                                                                                                                                                                                                                                                                                                                                                                                                                                                                                                                                                                                                                                                                                                                                                       |                                                                                             |                                                                                      |                                                                         |         |                  |                                                                                                                                                                                                                                                                                                                                                                                                                                                                                                                                                                                                                                                                                                                                                                                                                                                                                                                                                                                                                                                                                                                                                                                                                                                                                                                                                                                                                                                                                                                                                                                                                                                                                                                                                                                                                                                                           |                                                                                                                        |                                                                                                                          |                                                                                                         |                                                                                                      |                                                                                  |                                                                                          |                                                                                          |                                                                                                                                                                                |                                                                                                                       |                                                                                          |                                                                                                     |                                                                                                                                                                                                                                                                                                                                                                                                                                                                                                                                                                                                                                                                                                                                                                                                                                                                                                                                                                                                                                                                                                                                                                                                                                                                                                                                                                                                                                                                                                                                                                                                                                                                                                                                                                                                                                                                                                                  |                                                                                                    |                                                                                             |                                                                          |                                                                               |                                                                                                            |                                                             |                                                                                                              |                                                                                                           |                                                                                                                                                  |                                                                                                                              |                                                                   |                                                              |                                                                                               |                                                                           |                                                                                           |                                                                          |                                                                                            |                                                                           |                                                                                                 |                                                            |
|                                                                                  |                                                                                                                                                                                                       | 2.3/C Describes individual and population risk factors for mental illness                                                                                                                                                                                                                                                                                                                                                                                                                                                                                                                                                                                                                                                                                                                                                                                                                                                                                                                                                                                                                                                                                                                                                                                                                                                                                                                                                                                                                                                                                                                                                                                                                                                                                                                                                                                                                                                                                                                                                                                                                                                                                                                                                        | 3.2/C Describes prevention measures: universal, selective and indicated <sup>2</sup>                                                                                           | 4.2/C Employs prevention and risk reduction strategies in clinical care                                                                                                                    |                                                                                                                                      |         |         |         |  |                                                                             |                                                                                            |                                                                    |                                                                                                                                               |                                                                                                                                      |  |                                                                                                                                                                                                       |                                                                                                                                                       |                                                                                   |                                                                                                                                                                                            |                                                                                        |           |                                                                                                                                                                                                                                                                                                                                                                                                                                                                                                                                                                                                                                                                                                                                                                                                                                                                                                                                                                                                                                                                                                                                                                                                                                                                                                                                                                                                                                                                                                                                                                                                                                                                                                                                                                                                                                                                                                                                                                                                                                                                                                                       |                                                                                             |                                                                                      |                                                                         |         |                  |                                                                                                                                                                                                                                                                                                                                                                                                                                                                                                                                                                                                                                                                                                                                                                                                                                                                                                                                                                                                                                                                                                                                                                                                                                                                                                                                                                                                                                                                                                                                                                                                                                                                                                                                                                                                                                                                           |                                                                                                                        |                                                                                                                          |                                                                                                         |                                                                                                      |                                                                                  |                                                                                          |                                                                                          |                                                                                                                                                                                |                                                                                                                       |                                                                                          |                                                                                                     |                                                                                                                                                                                                                                                                                                                                                                                                                                                                                                                                                                                                                                                                                                                                                                                                                                                                                                                                                                                                                                                                                                                                                                                                                                                                                                                                                                                                                                                                                                                                                                                                                                                                                                                                                                                                                                                                                                                  |                                                                                                    |                                                                                             |                                                                          |                                                                               |                                                                                                            |                                                             |                                                                                                              |                                                                                                           |                                                                                                                                                  |                                                                                                                              |                                                                   |                                                              |                                                                                               |                                                                           |                                                                                           |                                                                          |                                                                                            |                                                                           |                                                                                                 |                                                            |
|                                                                                  |                                                                                                                                                                                                       |                                                                                                                                                                                                                                                                                                                                                                                                                                                                                                                                                                                                                                                                                                                                                                                                                                                                                                                                                                                                                                                                                                                                                                                                                                                                                                                                                                                                                                                                                                                                                                                                                                                                                                                                                                                                                                                                                                                                                                                                                                                                                                                                                                                                                                  | 3.3/D Describes rehabilitation programs (vocational, brain injury, etc.) and the recovery model <sup>3</sup>                                                                   | 4.3/D Appropriately refers to rehabilitation and recovery programs                                                                                                                         | 5.3/D Practices effectively, in a rehabilitation and/or recovery-based program                                                       |         |         |         |  |                                                                             |                                                                                            |                                                                    |                                                                                                                                               |                                                                                                                                      |  |                                                                                                                                                                                                       |                                                                                                                                                       |                                                                                   |                                                                                                                                                                                            |                                                                                        |           |                                                                                                                                                                                                                                                                                                                                                                                                                                                                                                                                                                                                                                                                                                                                                                                                                                                                                                                                                                                                                                                                                                                                                                                                                                                                                                                                                                                                                                                                                                                                                                                                                                                                                                                                                                                                                                                                                                                                                                                                                                                                                                                       |                                                                                             |                                                                                      |                                                                         |         |                  |                                                                                                                                                                                                                                                                                                                                                                                                                                                                                                                                                                                                                                                                                                                                                                                                                                                                                                                                                                                                                                                                                                                                                                                                                                                                                                                                                                                                                                                                                                                                                                                                                                                                                                                                                                                                                                                                           |                                                                                                                        |                                                                                                                          |                                                                                                         |                                                                                                      |                                                                                  |                                                                                          |                                                                                          |                                                                                                                                                                                |                                                                                                                       |                                                                                          |                                                                                                     |                                                                                                                                                                                                                                                                                                                                                                                                                                                                                                                                                                                                                                                                                                                                                                                                                                                                                                                                                                                                                                                                                                                                                                                                                                                                                                                                                                                                                                                                                                                                                                                                                                                                                                                                                                                                                                                                                                                  |                                                                                                    |                                                                                             |                                                                          |                                                                               |                                                                                                            |                                                             |                                                                                                              |                                                                                                           |                                                                                                                                                  |                                                                                                                              |                                                                   |                                                              |                                                                                               |                                                                           |                                                                                           |                                                                          |                                                                                            |                                                                           |                                                                                                 |                                                            |
|                                                                                  |                                                                                                                                                                                                       |                                                                                                                                                                                                                                                                                                                                                                                                                                                                                                                                                                                                                                                                                                                                                                                                                                                                                                                                                                                                                                                                                                                                                                                                                                                                                                                                                                                                                                                                                                                                                                                                                                                                                                                                                                                                                                                                                                                                                                                                                                                                                                                                                                                                                                  |                                                                                                                                                                                | 4.4/D Uses principles of evidence-based practice and patient centered care in management of chronically ill patients.                                                                      |                                                                                                                                      |         |         |         |  |                                                                             |                                                                                            |                                                                    |                                                                                                                                               |                                                                                                                                      |  |                                                                                                                                                                                                       |                                                                                                                                                       |                                                                                   |                                                                                                                                                                                            |                                                                                        |           |                                                                                                                                                                                                                                                                                                                                                                                                                                                                                                                                                                                                                                                                                                                                                                                                                                                                                                                                                                                                                                                                                                                                                                                                                                                                                                                                                                                                                                                                                                                                                                                                                                                                                                                                                                                                                                                                                                                                                                                                                                                                                                                       |                                                                                             |                                                                                      |                                                                         |         |                  |                                                                                                                                                                                                                                                                                                                                                                                                                                                                                                                                                                                                                                                                                                                                                                                                                                                                                                                                                                                                                                                                                                                                                                                                                                                                                                                                                                                                                                                                                                                                                                                                                                                                                                                                                                                                                                                                           |                                                                                                                        |                                                                                                                          |                                                                                                         |                                                                                                      |                                                                                  |                                                                                          |                                                                                          |                                                                                                                                                                                |                                                                                                                       |                                                                                          |                                                                                                     |                                                                                                                                                                                                                                                                                                                                                                                                                                                                                                                                                                                                                                                                                                                                                                                                                                                                                                                                                                                                                                                                                                                                                                                                                                                                                                                                                                                                                                                                                                                                                                                                                                                                                                                                                                                                                                                                                                                  |                                                                                                    |                                                                                             |                                                                          |                                                                               |                                                                                                            |                                                             |                                                                                                              |                                                                                                           |                                                                                                                                                  |                                                                                                                              |                                                                   |                                                              |                                                                                               |                                                                           |                                                                                           |                                                                          |                                                                                            |                                                                           |                                                                                                 |                                                            |
| Level 1                                                                          | Level 2                                                                                                                                                                                               | Level 3                                                                                                                                                                                                                                                                                                                                                                                                                                                                                                                                                                                                                                                                                                                                                                                                                                                                                                                                                                                                                                                                                                                                                                                                                                                                                                                                                                                                                                                                                                                                                                                                                                                                                                                                                                                                                                                                                                                                                                                                                                                                                                                                                                                                                          | Level 4                                                                                                                                                                        | Level 5                                                                                                                                                                                    |                                                                                                                                      |         |         |         |  |                                                                             |                                                                                            |                                                                    |                                                                                                                                               |                                                                                                                                      |  |                                                                                                                                                                                                       |                                                                                                                                                       |                                                                                   |                                                                                                                                                                                            |                                                                                        |           |                                                                                                                                                                                                                                                                                                                                                                                                                                                                                                                                                                                                                                                                                                                                                                                                                                                                                                                                                                                                                                                                                                                                                                                                                                                                                                                                                                                                                                                                                                                                                                                                                                                                                                                                                                                                                                                                                                                                                                                                                                                                                                                       |                                                                                             |                                                                                      |                                                                         |         |                  |                                                                                                                                                                                                                                                                                                                                                                                                                                                                                                                                                                                                                                                                                                                                                                                                                                                                                                                                                                                                                                                                                                                                                                                                                                                                                                                                                                                                                                                                                                                                                                                                                                                                                                                                                                                                                                                                           |                                                                                                                        |                                                                                                                          |                                                                                                         |                                                                                                      |                                                                                  |                                                                                          |                                                                                          |                                                                                                                                                                                |                                                                                                                       |                                                                                          |                                                                                                     |                                                                                                                                                                                                                                                                                                                                                                                                                                                                                                                                                                                                                                                                                                                                                                                                                                                                                                                                                                                                                                                                                                                                                                                                                                                                                                                                                                                                                                                                                                                                                                                                                                                                                                                                                                                                                                                                                                                  |                                                                                                    |                                                                                             |                                                                          |                                                                               |                                                                                                            |                                                             |                                                                                                              |                                                                                                           |                                                                                                                                                  |                                                                                                                              |                                                                   |                                                              |                                                                                               |                                                                           |                                                                                           |                                                                          |                                                                                            |                                                                           |                                                                                                 |                                                            |
| Identifies key components of the complex health care system                      | Describes how components of a complex health care system are interrelated, and how this impacts patient care                                                                                          | Discusses how individual practice affects the broader system                                                                                                                                                                                                                                                                                                                                                                                                                                                                                                                                                                                                                                                                                                                                                                                                                                                                                                                                                                                                                                                                                                                                                                                                                                                                                                                                                                                                                                                                                                                                                                                                                                                                                                                                                                                                                                                                                                                                                                                                                                                                                                                                                                     | Manages various components of the complex health care system to provide high-value, efficient, and effective patient care and transition of care                               | Advocates for or leads systems change that enhances high-value, efficient, and effective patient care and transition of care                                                               |                                                                                                                                      |         |         |         |  |                                                                             |                                                                                            |                                                                    |                                                                                                                                               |                                                                                                                                      |  |                                                                                                                                                                                                       |                                                                                                                                                       |                                                                                   |                                                                                                                                                                                            |                                                                                        |           |                                                                                                                                                                                                                                                                                                                                                                                                                                                                                                                                                                                                                                                                                                                                                                                                                                                                                                                                                                                                                                                                                                                                                                                                                                                                                                                                                                                                                                                                                                                                                                                                                                                                                                                                                                                                                                                                                                                                                                                                                                                                                                                       |                                                                                             |                                                                                      |                                                                         |         |                  |                                                                                                                                                                                                                                                                                                                                                                                                                                                                                                                                                                                                                                                                                                                                                                                                                                                                                                                                                                                                                                                                                                                                                                                                                                                                                                                                                                                                                                                                                                                                                                                                                                                                                                                                                                                                                                                                           |                                                                                                                        |                                                                                                                          |                                                                                                         |                                                                                                      |                                                                                  |                                                                                          |                                                                                          |                                                                                                                                                                                |                                                                                                                       |                                                                                          |                                                                                                     |                                                                                                                                                                                                                                                                                                                                                                                                                                                                                                                                                                                                                                                                                                                                                                                                                                                                                                                                                                                                                                                                                                                                                                                                                                                                                                                                                                                                                                                                                                                                                                                                                                                                                                                                                                                                                                                                                                                  |                                                                                                    |                                                                                             |                                                                          |                                                                               |                                                                                                            |                                                             |                                                                                                              |                                                                                                           |                                                                                                                                                  |                                                                                                                              |                                                                   |                                                              |                                                                                               |                                                                           |                                                                                           |                                                                          |                                                                                            |                                                                           |                                                                                                 |                                                            |
| Describes practice models and basic mental health payment systems                | Identifies barriers to care in different health care systems                                                                                                                                          | Engages with patients in shared decision making and advocates for appropriate care and parity                                                                                                                                                                                                                                                                                                                                                                                                                                                                                                                                                                                                                                                                                                                                                                                                                                                                                                                                                                                                                                                                                                                                                                                                                                                                                                                                                                                                                                                                                                                                                                                                                                                                                                                                                                                                                                                                                                                                                                                                                                                                                                                                    | Advocates for patient care needs including mobilizing community resources                                                                                                      | Participates in advocacy activities for access to care in mental health and reimbursement                                                                                                  |                                                                                                                                      |         |         |         |  |                                                                             |                                                                                            |                                                                    |                                                                                                                                               |                                                                                                                                      |  |                                                                                                                                                                                                       |                                                                                                                                                       |                                                                                   |                                                                                                                                                                                            |                                                                                        |           |                                                                                                                                                                                                                                                                                                                                                                                                                                                                                                                                                                                                                                                                                                                                                                                                                                                                                                                                                                                                                                                                                                                                                                                                                                                                                                                                                                                                                                                                                                                                                                                                                                                                                                                                                                                                                                                                                                                                                                                                                                                                                                                       |                                                                                             |                                                                                      |                                                                         |         |                  |                                                                                                                                                                                                                                                                                                                                                                                                                                                                                                                                                                                                                                                                                                                                                                                                                                                                                                                                                                                                                                                                                                                                                                                                                                                                                                                                                                                                                                                                                                                                                                                                                                                                                                                                                                                                                                                                           |                                                                                                                        |                                                                                                                          |                                                                                                         |                                                                                                      |                                                                                  |                                                                                          |                                                                                          |                                                                                                                                                                                |                                                                                                                       |                                                                                          |                                                                                                     |                                                                                                                                                                                                                                                                                                                                                                                                                                                                                                                                                                                                                                                                                                                                                                                                                                                                                                                                                                                                                                                                                                                                                                                                                                                                                                                                                                                                                                                                                                                                                                                                                                                                                                                                                                                                                                                                                                                  |                                                                                                    |                                                                                             |                                                                          |                                                                               |                                                                                                            |                                                             |                                                                                                              |                                                                                                           |                                                                                                                                                  |                                                                                                                              |                                                                   |                                                              |                                                                                               |                                                                           |                                                                                           |                                                                          |                                                                                            |                                                                           |                                                                                                 |                                                            |
| Identifies basic knowledge domains for effective transition to residency         | Demonstrates use of information technology and documentation required for medical practice                                                                                                            | Describes core administrative knowledge needed for transition to practice                                                                                                                                                                                                                                                                                                                                                                                                                                                                                                                                                                                                                                                                                                                                                                                                                                                                                                                                                                                                                                                                                                                                                                                                                                                                                                                                                                                                                                                                                                                                                                                                                                                                                                                                                                                                                                                                                                                                                                                                                                                                                                                                                        | Analyzes individual practice patterns and professional requirements in preparation for practice                                                                                | Educates others to prepare them for transition to practice                                                                                                                                 |                                                                                                                                      |         |         |         |  |                                                                             |                                                                                            |                                                                    |                                                                                                                                               |                                                                                                                                      |  |                                                                                                                                                                                                       |                                                                                                                                                       |                                                                                   |                                                                                                                                                                                            |                                                                                        |           |                                                                                                                                                                                                                                                                                                                                                                                                                                                                                                                                                                                                                                                                                                                                                                                                                                                                                                                                                                                                                                                                                                                                                                                                                                                                                                                                                                                                                                                                                                                                                                                                                                                                                                                                                                                                                                                                                                                                                                                                                                                                                                                       |                                                                                             |                                                                                      |                                                                         |         |                  |                                                                                                                                                                                                                                                                                                                                                                                                                                                                                                                                                                                                                                                                                                                                                                                                                                                                                                                                                                                                                                                                                                                                                                                                                                                                                                                                                                                                                                                                                                                                                                                                                                                                                                                                                                                                                                                                           |                                                                                                                        |                                                                                                                          |                                                                                                         |                                                                                                      |                                                                                  |                                                                                          |                                                                                          |                                                                                                                                                                                |                                                                                                                       |                                                                                          |                                                                                                     |                                                                                                                                                                                                                                                                                                                                                                                                                                                                                                                                                                                                                                                                                                                                                                                                                                                                                                                                                                                                                                                                                                                                                                                                                                                                                                                                                                                                                                                                                                                                                                                                                                                                                                                                                                                                                                                                                                                  |                                                                                                    |                                                                                             |                                                                          |                                                                               |                                                                                                            |                                                             |                                                                                                              |                                                                                                           |                                                                                                                                                  |                                                                                                                              |                                                                   |                                                              |                                                                                               |                                                                           |                                                                                           |                                                                          |                                                                                            |                                                                           |                                                                                                 |                                                            |

| <p><b>Psychiatry</b></p>                                                                                                                                                                                                                                                                                                                                                                                     | <p>Consultant<br/>Teams</p>                                                                                                                                                                                                                                                                                                                                                                                 | <p><b>SBP4. Consultation to non-psychiatric medical providers and non-medical systems (e.g., military, schools, businesses, forensic)</b><br/> <b>A:</b> Distinguishes care provider roles related to consultation<br/> <b>B:</b> Provides care as a consultant and collaborator<br/> <b>C:</b> Specific consultative activities</p> <table border="1"> <thead> <tr> <th>Has not Achieved Level 1</th> <th>Level 1</th> <th>Level 2</th> <th>Level 3</th> <th>Level 4</th> <th>Level 5</th> </tr> </thead> <tbody> <tr> <td></td> <td>1.1/A Describes the difference between consultant and primary treatment provider</td> <td>2.1/A Describes differences in providing consultation for the system or team versus the individual patient<br/>2.2/B Provides consultation to other medical services</td> <td>3.1/C Assists primary treatment care team in identifying unrecognized clinical care issues<br/>3.2/C Identifies system issues in clinical care and provides recommendations<br/>3.3/C Discusses methods for integrating mental health and medical care in treatment planning</td> <td>4.1/B Provides integrated care for psychiatric patients through collaboration with other physicians'<br/>4.2/C Manages complicated and challenging consultation requests</td> <td>5.1/B Provides psychiatric consultations to larger systems<br/>5.2/B Leads a consultation team</td> </tr> </tbody> </table>                                                                                                                                                                                                                                                                                                                                                                                                                                                                                                                                                                                                                                                                                                                                                                                                                                                            | Has not Achieved Level 1                                                                                                                                                                                                                                                                                                                                                                           | Level 1                                                                                                                                                                                                                            | Level 2                                                                                                                                                                                                    | Level 3                                                                                                                                                                                                                                                                                               | Level 4 | Level 5                                                                                                                                                                                                                                                                                                                                                                                                      |                                                                                                                                                                                                                                                                                                                                                                                                             | 1.1/A Describes the difference between consultant and primary treatment provider                                                                                                                                                                                                                                                                                                                      | 2.1/A Describes differences in providing consultation for the system or team versus the individual patient<br>2.2/B Provides consultation to other medical services                                                                                                                                                                                                                                | 3.1/C Assists primary treatment care team in identifying unrecognized clinical care issues<br>3.2/C Identifies system issues in clinical care and provides recommendations<br>3.3/C Discusses methods for integrating mental health and medical care in treatment planning | 4.1/B Provides integrated care for psychiatric patients through collaboration with other physicians'<br>4.2/C Manages complicated and challenging consultation requests                | 5.1/B Provides psychiatric consultations to larger systems<br>5.2/B Leads a consultation team                                                                                                                                      |                                                                                                                                                                                                            |                                                                                                                                                                                                                                                                                                       |                  |                                                                                                                                                                                                                                                                                                                                                                                                                                                                                                                                                                                                                                                                                                                                                                                                                                                                                                                                                                                                                                                                                                                                                                                                                                                                                                                                                                                                                                                                                                                                                                                                                                                                                   |         |         |         |         |         |                                                        |                                                              |                                                                         |                                                                                                         |                                                                                         |                                                               |                                                                                             |                                                                                                    |                                                                                |                                                           |                                                                               |                                                                                                  |                                                       |                                                                                                             |                                                                                                           |
|--------------------------------------------------------------------------------------------------------------------------------------------------------------------------------------------------------------------------------------------------------------------------------------------------------------------------------------------------------------------------------------------------------------|-------------------------------------------------------------------------------------------------------------------------------------------------------------------------------------------------------------------------------------------------------------------------------------------------------------------------------------------------------------------------------------------------------------|------------------------------------------------------------------------------------------------------------------------------------------------------------------------------------------------------------------------------------------------------------------------------------------------------------------------------------------------------------------------------------------------------------------------------------------------------------------------------------------------------------------------------------------------------------------------------------------------------------------------------------------------------------------------------------------------------------------------------------------------------------------------------------------------------------------------------------------------------------------------------------------------------------------------------------------------------------------------------------------------------------------------------------------------------------------------------------------------------------------------------------------------------------------------------------------------------------------------------------------------------------------------------------------------------------------------------------------------------------------------------------------------------------------------------------------------------------------------------------------------------------------------------------------------------------------------------------------------------------------------------------------------------------------------------------------------------------------------------------------------------------------------------------------------------------------------------------------------------------------------------------------------------------------------------------------------------------------------------------------------------------------------------------------------------------------------------------------------------------------------------------------------------------------------------------------------------------------------------------------------------------------------------|----------------------------------------------------------------------------------------------------------------------------------------------------------------------------------------------------------------------------------------------------------------------------------------------------------------------------------------------------------------------------------------------------|------------------------------------------------------------------------------------------------------------------------------------------------------------------------------------------------------------------------------------|------------------------------------------------------------------------------------------------------------------------------------------------------------------------------------------------------------|-------------------------------------------------------------------------------------------------------------------------------------------------------------------------------------------------------------------------------------------------------------------------------------------------------|---------|--------------------------------------------------------------------------------------------------------------------------------------------------------------------------------------------------------------------------------------------------------------------------------------------------------------------------------------------------------------------------------------------------------------|-------------------------------------------------------------------------------------------------------------------------------------------------------------------------------------------------------------------------------------------------------------------------------------------------------------------------------------------------------------------------------------------------------------|-------------------------------------------------------------------------------------------------------------------------------------------------------------------------------------------------------------------------------------------------------------------------------------------------------------------------------------------------------------------------------------------------------|----------------------------------------------------------------------------------------------------------------------------------------------------------------------------------------------------------------------------------------------------------------------------------------------------------------------------------------------------------------------------------------------------|----------------------------------------------------------------------------------------------------------------------------------------------------------------------------------------------------------------------------------------------------------------------------|----------------------------------------------------------------------------------------------------------------------------------------------------------------------------------------|------------------------------------------------------------------------------------------------------------------------------------------------------------------------------------------------------------------------------------|------------------------------------------------------------------------------------------------------------------------------------------------------------------------------------------------------------|-------------------------------------------------------------------------------------------------------------------------------------------------------------------------------------------------------------------------------------------------------------------------------------------------------|------------------|-----------------------------------------------------------------------------------------------------------------------------------------------------------------------------------------------------------------------------------------------------------------------------------------------------------------------------------------------------------------------------------------------------------------------------------------------------------------------------------------------------------------------------------------------------------------------------------------------------------------------------------------------------------------------------------------------------------------------------------------------------------------------------------------------------------------------------------------------------------------------------------------------------------------------------------------------------------------------------------------------------------------------------------------------------------------------------------------------------------------------------------------------------------------------------------------------------------------------------------------------------------------------------------------------------------------------------------------------------------------------------------------------------------------------------------------------------------------------------------------------------------------------------------------------------------------------------------------------------------------------------------------------------------------------------------|---------|---------|---------|---------|---------|--------------------------------------------------------|--------------------------------------------------------------|-------------------------------------------------------------------------|---------------------------------------------------------------------------------------------------------|-----------------------------------------------------------------------------------------|---------------------------------------------------------------|---------------------------------------------------------------------------------------------|----------------------------------------------------------------------------------------------------|--------------------------------------------------------------------------------|-----------------------------------------------------------|-------------------------------------------------------------------------------|--------------------------------------------------------------------------------------------------|-------------------------------------------------------|-------------------------------------------------------------------------------------------------------------|-----------------------------------------------------------------------------------------------------------|
| Has not Achieved Level 1                                                                                                                                                                                                                                                                                                                                                                                     | Level 1                                                                                                                                                                                                                                                                                                                                                                                                     | Level 2                                                                                                                                                                                                                                                                                                                                                                                                                                                                                                                                                                                                                                                                                                                                                                                                                                                                                                                                                                                                                                                                                                                                                                                                                                                                                                                                                                                                                                                                                                                                                                                                                                                                                                                                                                                                                                                                                                                                                                                                                                                                                                                                                                                                                                                                      | Level 3                                                                                                                                                                                                                                                                                                                                                                                            | Level 4                                                                                                                                                                                                                            | Level 5                                                                                                                                                                                                    |                                                                                                                                                                                                                                                                                                       |         |                                                                                                                                                                                                                                                                                                                                                                                                              |                                                                                                                                                                                                                                                                                                                                                                                                             |                                                                                                                                                                                                                                                                                                                                                                                                       |                                                                                                                                                                                                                                                                                                                                                                                                    |                                                                                                                                                                                                                                                                            |                                                                                                                                                                                        |                                                                                                                                                                                                                                    |                                                                                                                                                                                                            |                                                                                                                                                                                                                                                                                                       |                  |                                                                                                                                                                                                                                                                                                                                                                                                                                                                                                                                                                                                                                                                                                                                                                                                                                                                                                                                                                                                                                                                                                                                                                                                                                                                                                                                                                                                                                                                                                                                                                                                                                                                                   |         |         |         |         |         |                                                        |                                                              |                                                                         |                                                                                                         |                                                                                         |                                                               |                                                                                             |                                                                                                    |                                                                                |                                                           |                                                                               |                                                                                                  |                                                       |                                                                                                             |                                                                                                           |
|                                                                                                                                                                                                                                                                                                                                                                                                              | 1.1/A Describes the difference between consultant and primary treatment provider                                                                                                                                                                                                                                                                                                                            | 2.1/A Describes differences in providing consultation for the system or team versus the individual patient<br>2.2/B Provides consultation to other medical services                                                                                                                                                                                                                                                                                                                                                                                                                                                                                                                                                                                                                                                                                                                                                                                                                                                                                                                                                                                                                                                                                                                                                                                                                                                                                                                                                                                                                                                                                                                                                                                                                                                                                                                                                                                                                                                                                                                                                                                                                                                                                                          | 3.1/C Assists primary treatment care team in identifying unrecognized clinical care issues<br>3.2/C Identifies system issues in clinical care and provides recommendations<br>3.3/C Discusses methods for integrating mental health and medical care in treatment planning                                                                                                                         | 4.1/B Provides integrated care for psychiatric patients through collaboration with other physicians'<br>4.2/C Manages complicated and challenging consultation requests                                                            | 5.1/B Provides psychiatric consultations to larger systems<br>5.2/B Leads a consultation team                                                                                                              |                                                                                                                                                                                                                                                                                                       |         |                                                                                                                                                                                                                                                                                                                                                                                                              |                                                                                                                                                                                                                                                                                                                                                                                                             |                                                                                                                                                                                                                                                                                                                                                                                                       |                                                                                                                                                                                                                                                                                                                                                                                                    |                                                                                                                                                                                                                                                                            |                                                                                                                                                                                        |                                                                                                                                                                                                                                    |                                                                                                                                                                                                            |                                                                                                                                                                                                                                                                                                       |                  |                                                                                                                                                                                                                                                                                                                                                                                                                                                                                                                                                                                                                                                                                                                                                                                                                                                                                                                                                                                                                                                                                                                                                                                                                                                                                                                                                                                                                                                                                                                                                                                                                                                                                   |         |         |         |         |         |                                                        |                                                              |                                                                         |                                                                                                         |                                                                                         |                                                               |                                                                                             |                                                                                                    |                                                                                |                                                           |                                                                               |                                                                                                  |                                                       |                                                                                                             |                                                                                                           |
| <p><b>Radiation Oncology</b></p>                                                                                                                                                                                                                                                                                                                                                                             | <p>CC</p>                                                                                                                                                                                                                                                                                                                                                                                                   | <p><b>Work and coordinate patient care effectively in various health care delivery settings and systems — Systems-based Practice</b></p> <table border="1"> <thead> <tr> <th>Level 1</th> <th>Level 2</th> <th>Level 3</th> <th>Level 4</th> <th>Level 5</th> </tr> </thead> <tbody> <tr> <td> <ul style="list-style-type: none"> <li>Recognizes various health care delivery settings and systems</li> </ul> </td> <td> <ul style="list-style-type: none"> <li>Works and coordinates patient care in various health care delivery settings and systems for common clinical situations</li> </ul> </td> <td> <ul style="list-style-type: none"> <li>Works and coordinates patient care in various health care delivery settings and systems for most clinical situations</li> </ul> </td> <td> <ul style="list-style-type: none"> <li>Works and coordinates patient care in various health care delivery settings and systems for all clinical situations</li> </ul> </td> <td> <ul style="list-style-type: none"> <li>Publishes research on coordinating patient care in various health care delivery settings and systems</li> </ul> </td> </tr> </tbody> </table>                                                                                                                                                                                                                                                                                                                                                                                                                                                                                                                                                                                                                                                                                                                                                                                                                                                                                                                                                                                                                                                                                                         | Level 1                                                                                                                                                                                                                                                                                                                                                                                            | Level 2                                                                                                                                                                                                                            | Level 3                                                                                                                                                                                                    | Level 4                                                                                                                                                                                                                                                                                               | Level 5 | <ul style="list-style-type: none"> <li>Recognizes various health care delivery settings and systems</li> </ul>                                                                                                                                                                                                                                                                                               | <ul style="list-style-type: none"> <li>Works and coordinates patient care in various health care delivery settings and systems for common clinical situations</li> </ul>                                                                                                                                                                                                                                    | <ul style="list-style-type: none"> <li>Works and coordinates patient care in various health care delivery settings and systems for most clinical situations</li> </ul>                                                                                                                                                                                                                                | <ul style="list-style-type: none"> <li>Works and coordinates patient care in various health care delivery settings and systems for all clinical situations</li> </ul>                                                                                                                                                                                                                              | <ul style="list-style-type: none"> <li>Publishes research on coordinating patient care in various health care delivery settings and systems</li> </ul>                                                                                                                     |                                                                                                                                                                                        |                                                                                                                                                                                                                                    |                                                                                                                                                                                                            |                                                                                                                                                                                                                                                                                                       |                  |                                                                                                                                                                                                                                                                                                                                                                                                                                                                                                                                                                                                                                                                                                                                                                                                                                                                                                                                                                                                                                                                                                                                                                                                                                                                                                                                                                                                                                                                                                                                                                                                                                                                                   |         |         |         |         |         |                                                        |                                                              |                                                                         |                                                                                                         |                                                                                         |                                                               |                                                                                             |                                                                                                    |                                                                                |                                                           |                                                                               |                                                                                                  |                                                       |                                                                                                             |                                                                                                           |
| Level 1                                                                                                                                                                                                                                                                                                                                                                                                      | Level 2                                                                                                                                                                                                                                                                                                                                                                                                     | Level 3                                                                                                                                                                                                                                                                                                                                                                                                                                                                                                                                                                                                                                                                                                                                                                                                                                                                                                                                                                                                                                                                                                                                                                                                                                                                                                                                                                                                                                                                                                                                                                                                                                                                                                                                                                                                                                                                                                                                                                                                                                                                                                                                                                                                                                                                      | Level 4                                                                                                                                                                                                                                                                                                                                                                                            | Level 5                                                                                                                                                                                                                            |                                                                                                                                                                                                            |                                                                                                                                                                                                                                                                                                       |         |                                                                                                                                                                                                                                                                                                                                                                                                              |                                                                                                                                                                                                                                                                                                                                                                                                             |                                                                                                                                                                                                                                                                                                                                                                                                       |                                                                                                                                                                                                                                                                                                                                                                                                    |                                                                                                                                                                                                                                                                            |                                                                                                                                                                                        |                                                                                                                                                                                                                                    |                                                                                                                                                                                                            |                                                                                                                                                                                                                                                                                                       |                  |                                                                                                                                                                                                                                                                                                                                                                                                                                                                                                                                                                                                                                                                                                                                                                                                                                                                                                                                                                                                                                                                                                                                                                                                                                                                                                                                                                                                                                                                                                                                                                                                                                                                                   |         |         |         |         |         |                                                        |                                                              |                                                                         |                                                                                                         |                                                                                         |                                                               |                                                                                             |                                                                                                    |                                                                                |                                                           |                                                                               |                                                                                                  |                                                       |                                                                                                             |                                                                                                           |
| <ul style="list-style-type: none"> <li>Recognizes various health care delivery settings and systems</li> </ul>                                                                                                                                                                                                                                                                                               | <ul style="list-style-type: none"> <li>Works and coordinates patient care in various health care delivery settings and systems for common clinical situations</li> </ul>                                                                                                                                                                                                                                    | <ul style="list-style-type: none"> <li>Works and coordinates patient care in various health care delivery settings and systems for most clinical situations</li> </ul>                                                                                                                                                                                                                                                                                                                                                                                                                                                                                                                                                                                                                                                                                                                                                                                                                                                                                                                                                                                                                                                                                                                                                                                                                                                                                                                                                                                                                                                                                                                                                                                                                                                                                                                                                                                                                                                                                                                                                                                                                                                                                                       | <ul style="list-style-type: none"> <li>Works and coordinates patient care in various health care delivery settings and systems for all clinical situations</li> </ul>                                                                                                                                                                                                                              | <ul style="list-style-type: none"> <li>Publishes research on coordinating patient care in various health care delivery settings and systems</li> </ul>                                                                             |                                                                                                                                                                                                            |                                                                                                                                                                                                                                                                                                       |         |                                                                                                                                                                                                                                                                                                                                                                                                              |                                                                                                                                                                                                                                                                                                                                                                                                             |                                                                                                                                                                                                                                                                                                                                                                                                       |                                                                                                                                                                                                                                                                                                                                                                                                    |                                                                                                                                                                                                                                                                            |                                                                                                                                                                                        |                                                                                                                                                                                                                                    |                                                                                                                                                                                                            |                                                                                                                                                                                                                                                                                                       |                  |                                                                                                                                                                                                                                                                                                                                                                                                                                                                                                                                                                                                                                                                                                                                                                                                                                                                                                                                                                                                                                                                                                                                                                                                                                                                                                                                                                                                                                                                                                                                                                                                                                                                                   |         |         |         |         |         |                                                        |                                                              |                                                                         |                                                                                                         |                                                                                         |                                                               |                                                                                             |                                                                                                    |                                                                                |                                                           |                                                                               |                                                                                                  |                                                       |                                                                                                             |                                                                                                           |
| <p><b>Radiation Oncology</b></p>                                                                                                                                                                                                                                                                                                                                                                             | <p>HC Costs and Risk</p>                                                                                                                                                                                                                                                                                                                                                                                    | <p><b>Incorporate considerations of cost awareness and risk-benefit analysis in patient- and/or population-based care, as appropriate — Systems-based Practice</b></p> <table border="1"> <thead> <tr> <th>Level 1</th> <th>Level 2</th> <th>Level 3</th> <th>Level 4</th> <th>Level 5</th> </tr> </thead> <tbody> <tr> <td> <ul style="list-style-type: none"> <li>Recognizes the importance of cost awareness and risk-benefit analysis for patient- and/or population-based care</li> </ul> </td> <td> <ul style="list-style-type: none"> <li>Incorporates considerations of cost awareness and risk-benefit analysis for patient- and/or population-based care for common clinical situations</li> </ul> </td> <td> <ul style="list-style-type: none"> <li>Incorporates considerations of cost awareness and risk-benefit analysis in patient- and/or population-based care for most clinical situations</li> </ul> </td> <td> <ul style="list-style-type: none"> <li>Incorporates considerations of cost awareness and risk-benefit analysis for patient- and/or population-based care for all clinical situations</li> </ul> </td> <td> <ul style="list-style-type: none"> <li>Publishes research on cost awareness and risk-benefit analysis for patient- and/or population-based care</li> </ul> </td> </tr> </tbody> </table>                                                                                                                                                                                                                                                                                                                                                                                                                                                                                                                                                                                                                                                                                                                                                                                                                                                                                                                                       | Level 1                                                                                                                                                                                                                                                                                                                                                                                            | Level 2                                                                                                                                                                                                                            | Level 3                                                                                                                                                                                                    | Level 4                                                                                                                                                                                                                                                                                               | Level 5 | <ul style="list-style-type: none"> <li>Recognizes the importance of cost awareness and risk-benefit analysis for patient- and/or population-based care</li> </ul>                                                                                                                                                                                                                                            | <ul style="list-style-type: none"> <li>Incorporates considerations of cost awareness and risk-benefit analysis for patient- and/or population-based care for common clinical situations</li> </ul>                                                                                                                                                                                                          | <ul style="list-style-type: none"> <li>Incorporates considerations of cost awareness and risk-benefit analysis in patient- and/or population-based care for most clinical situations</li> </ul>                                                                                                                                                                                                       | <ul style="list-style-type: none"> <li>Incorporates considerations of cost awareness and risk-benefit analysis for patient- and/or population-based care for all clinical situations</li> </ul>                                                                                                                                                                                                    | <ul style="list-style-type: none"> <li>Publishes research on cost awareness and risk-benefit analysis for patient- and/or population-based care</li> </ul>                                                                                                                 |                                                                                                                                                                                        |                                                                                                                                                                                                                                    |                                                                                                                                                                                                            |                                                                                                                                                                                                                                                                                                       |                  |                                                                                                                                                                                                                                                                                                                                                                                                                                                                                                                                                                                                                                                                                                                                                                                                                                                                                                                                                                                                                                                                                                                                                                                                                                                                                                                                                                                                                                                                                                                                                                                                                                                                                   |         |         |         |         |         |                                                        |                                                              |                                                                         |                                                                                                         |                                                                                         |                                                               |                                                                                             |                                                                                                    |                                                                                |                                                           |                                                                               |                                                                                                  |                                                       |                                                                                                             |                                                                                                           |
| Level 1                                                                                                                                                                                                                                                                                                                                                                                                      | Level 2                                                                                                                                                                                                                                                                                                                                                                                                     | Level 3                                                                                                                                                                                                                                                                                                                                                                                                                                                                                                                                                                                                                                                                                                                                                                                                                                                                                                                                                                                                                                                                                                                                                                                                                                                                                                                                                                                                                                                                                                                                                                                                                                                                                                                                                                                                                                                                                                                                                                                                                                                                                                                                                                                                                                                                      | Level 4                                                                                                                                                                                                                                                                                                                                                                                            | Level 5                                                                                                                                                                                                                            |                                                                                                                                                                                                            |                                                                                                                                                                                                                                                                                                       |         |                                                                                                                                                                                                                                                                                                                                                                                                              |                                                                                                                                                                                                                                                                                                                                                                                                             |                                                                                                                                                                                                                                                                                                                                                                                                       |                                                                                                                                                                                                                                                                                                                                                                                                    |                                                                                                                                                                                                                                                                            |                                                                                                                                                                                        |                                                                                                                                                                                                                                    |                                                                                                                                                                                                            |                                                                                                                                                                                                                                                                                                       |                  |                                                                                                                                                                                                                                                                                                                                                                                                                                                                                                                                                                                                                                                                                                                                                                                                                                                                                                                                                                                                                                                                                                                                                                                                                                                                                                                                                                                                                                                                                                                                                                                                                                                                                   |         |         |         |         |         |                                                        |                                                              |                                                                         |                                                                                                         |                                                                                         |                                                               |                                                                                             |                                                                                                    |                                                                                |                                                           |                                                                               |                                                                                                  |                                                       |                                                                                                             |                                                                                                           |
| <ul style="list-style-type: none"> <li>Recognizes the importance of cost awareness and risk-benefit analysis for patient- and/or population-based care</li> </ul>                                                                                                                                                                                                                                            | <ul style="list-style-type: none"> <li>Incorporates considerations of cost awareness and risk-benefit analysis for patient- and/or population-based care for common clinical situations</li> </ul>                                                                                                                                                                                                          | <ul style="list-style-type: none"> <li>Incorporates considerations of cost awareness and risk-benefit analysis in patient- and/or population-based care for most clinical situations</li> </ul>                                                                                                                                                                                                                                                                                                                                                                                                                                                                                                                                                                                                                                                                                                                                                                                                                                                                                                                                                                                                                                                                                                                                                                                                                                                                                                                                                                                                                                                                                                                                                                                                                                                                                                                                                                                                                                                                                                                                                                                                                                                                              | <ul style="list-style-type: none"> <li>Incorporates considerations of cost awareness and risk-benefit analysis for patient- and/or population-based care for all clinical situations</li> </ul>                                                                                                                                                                                                    | <ul style="list-style-type: none"> <li>Publishes research on cost awareness and risk-benefit analysis for patient- and/or population-based care</li> </ul>                                                                         |                                                                                                                                                                                                            |                                                                                                                                                                                                                                                                                                       |         |                                                                                                                                                                                                                                                                                                                                                                                                              |                                                                                                                                                                                                                                                                                                                                                                                                             |                                                                                                                                                                                                                                                                                                                                                                                                       |                                                                                                                                                                                                                                                                                                                                                                                                    |                                                                                                                                                                                                                                                                            |                                                                                                                                                                                        |                                                                                                                                                                                                                                    |                                                                                                                                                                                                            |                                                                                                                                                                                                                                                                                                       |                  |                                                                                                                                                                                                                                                                                                                                                                                                                                                                                                                                                                                                                                                                                                                                                                                                                                                                                                                                                                                                                                                                                                                                                                                                                                                                                                                                                                                                                                                                                                                                                                                                                                                                                   |         |         |         |         |         |                                                        |                                                              |                                                                         |                                                                                                         |                                                                                         |                                                               |                                                                                             |                                                                                                    |                                                                                |                                                           |                                                                               |                                                                                                  |                                                       |                                                                                                             |                                                                                                           |
| <p><b>Radiation Oncology</b></p>                                                                                                                                                                                                                                                                                                                                                                             | <p>Teams<br/>QI<br/>Advocacy<br/>PS</p>                                                                                                                                                                                                                                                                                                                                                                     | <p><b>Work in interprofessional teams to enhance patient safety and improve patient care quality; advocate for quality patient care and optimal patient care systems; participate in identifying system errors and implementing potential system solutions — Systems-based Practice</b></p> <table border="1"> <thead> <tr> <th>Level 1</th> <th>Level 2</th> <th>Level 3</th> <th>Level 4</th> <th>Level 5</th> </tr> </thead> <tbody> <tr> <td> <ul style="list-style-type: none"> <li>Recognizes the importance of working in interprofessional teams to enhance patient safety and improve patient care quality</li> <li>Recognizes the importance of advocating for quality care and optimal patient care systems</li> <li>Recognizes the importance of participating in identifying system errors and implementing potential system solutions</li> </ul> </td> <td> <ul style="list-style-type: none"> <li>Works in interprofessional teams to enhance patient safety and improve patient care quality in common clinical situations</li> <li>Advocates for quality care and optimal patient care systems in common clinical situations</li> <li>Participates in identifying system errors and implementing potential system solutions in common clinical situations</li> </ul> </td> <td> <ul style="list-style-type: none"> <li>Works in interprofessional teams to enhance patient safety and improve patient care quality in most clinical situations</li> <li>Advocates for quality care and optimal patient care systems in most clinical situations</li> <li>Participates in identifying system errors and implementing potential system solutions in most clinical situations</li> </ul> </td> <td> <ul style="list-style-type: none"> <li>Works in interprofessional teams to enhance patient safety and improve patient care quality in all clinical situations</li> <li>Advocates for quality care and optimal patient care systems in all clinical situations</li> <li>Participates in identifying system errors and implementing potential system solutions in all clinical situations</li> </ul> </td> <td> <ul style="list-style-type: none"> <li>Publishes research on quality patient care or patient safety</li> </ul> </td> </tr> </tbody> </table> | Level 1                                                                                                                                                                                                                                                                                                                                                                                            | Level 2                                                                                                                                                                                                                            | Level 3                                                                                                                                                                                                    | Level 4                                                                                                                                                                                                                                                                                               | Level 5 | <ul style="list-style-type: none"> <li>Recognizes the importance of working in interprofessional teams to enhance patient safety and improve patient care quality</li> <li>Recognizes the importance of advocating for quality care and optimal patient care systems</li> <li>Recognizes the importance of participating in identifying system errors and implementing potential system solutions</li> </ul> | <ul style="list-style-type: none"> <li>Works in interprofessional teams to enhance patient safety and improve patient care quality in common clinical situations</li> <li>Advocates for quality care and optimal patient care systems in common clinical situations</li> <li>Participates in identifying system errors and implementing potential system solutions in common clinical situations</li> </ul> | <ul style="list-style-type: none"> <li>Works in interprofessional teams to enhance patient safety and improve patient care quality in most clinical situations</li> <li>Advocates for quality care and optimal patient care systems in most clinical situations</li> <li>Participates in identifying system errors and implementing potential system solutions in most clinical situations</li> </ul> | <ul style="list-style-type: none"> <li>Works in interprofessional teams to enhance patient safety and improve patient care quality in all clinical situations</li> <li>Advocates for quality care and optimal patient care systems in all clinical situations</li> <li>Participates in identifying system errors and implementing potential system solutions in all clinical situations</li> </ul> | <ul style="list-style-type: none"> <li>Publishes research on quality patient care or patient safety</li> </ul>                                                                                                                                                             |                                                                                                                                                                                        |                                                                                                                                                                                                                                    |                                                                                                                                                                                                            |                                                                                                                                                                                                                                                                                                       |                  |                                                                                                                                                                                                                                                                                                                                                                                                                                                                                                                                                                                                                                                                                                                                                                                                                                                                                                                                                                                                                                                                                                                                                                                                                                                                                                                                                                                                                                                                                                                                                                                                                                                                                   |         |         |         |         |         |                                                        |                                                              |                                                                         |                                                                                                         |                                                                                         |                                                               |                                                                                             |                                                                                                    |                                                                                |                                                           |                                                                               |                                                                                                  |                                                       |                                                                                                             |                                                                                                           |
| Level 1                                                                                                                                                                                                                                                                                                                                                                                                      | Level 2                                                                                                                                                                                                                                                                                                                                                                                                     | Level 3                                                                                                                                                                                                                                                                                                                                                                                                                                                                                                                                                                                                                                                                                                                                                                                                                                                                                                                                                                                                                                                                                                                                                                                                                                                                                                                                                                                                                                                                                                                                                                                                                                                                                                                                                                                                                                                                                                                                                                                                                                                                                                                                                                                                                                                                      | Level 4                                                                                                                                                                                                                                                                                                                                                                                            | Level 5                                                                                                                                                                                                                            |                                                                                                                                                                                                            |                                                                                                                                                                                                                                                                                                       |         |                                                                                                                                                                                                                                                                                                                                                                                                              |                                                                                                                                                                                                                                                                                                                                                                                                             |                                                                                                                                                                                                                                                                                                                                                                                                       |                                                                                                                                                                                                                                                                                                                                                                                                    |                                                                                                                                                                                                                                                                            |                                                                                                                                                                                        |                                                                                                                                                                                                                                    |                                                                                                                                                                                                            |                                                                                                                                                                                                                                                                                                       |                  |                                                                                                                                                                                                                                                                                                                                                                                                                                                                                                                                                                                                                                                                                                                                                                                                                                                                                                                                                                                                                                                                                                                                                                                                                                                                                                                                                                                                                                                                                                                                                                                                                                                                                   |         |         |         |         |         |                                                        |                                                              |                                                                         |                                                                                                         |                                                                                         |                                                               |                                                                                             |                                                                                                    |                                                                                |                                                           |                                                                               |                                                                                                  |                                                       |                                                                                                             |                                                                                                           |
| <ul style="list-style-type: none"> <li>Recognizes the importance of working in interprofessional teams to enhance patient safety and improve patient care quality</li> <li>Recognizes the importance of advocating for quality care and optimal patient care systems</li> <li>Recognizes the importance of participating in identifying system errors and implementing potential system solutions</li> </ul> | <ul style="list-style-type: none"> <li>Works in interprofessional teams to enhance patient safety and improve patient care quality in common clinical situations</li> <li>Advocates for quality care and optimal patient care systems in common clinical situations</li> <li>Participates in identifying system errors and implementing potential system solutions in common clinical situations</li> </ul> | <ul style="list-style-type: none"> <li>Works in interprofessional teams to enhance patient safety and improve patient care quality in most clinical situations</li> <li>Advocates for quality care and optimal patient care systems in most clinical situations</li> <li>Participates in identifying system errors and implementing potential system solutions in most clinical situations</li> </ul>                                                                                                                                                                                                                                                                                                                                                                                                                                                                                                                                                                                                                                                                                                                                                                                                                                                                                                                                                                                                                                                                                                                                                                                                                                                                                                                                                                                                                                                                                                                                                                                                                                                                                                                                                                                                                                                                        | <ul style="list-style-type: none"> <li>Works in interprofessional teams to enhance patient safety and improve patient care quality in all clinical situations</li> <li>Advocates for quality care and optimal patient care systems in all clinical situations</li> <li>Participates in identifying system errors and implementing potential system solutions in all clinical situations</li> </ul> | <ul style="list-style-type: none"> <li>Publishes research on quality patient care or patient safety</li> </ul>                                                                                                                     |                                                                                                                                                                                                            |                                                                                                                                                                                                                                                                                                       |         |                                                                                                                                                                                                                                                                                                                                                                                                              |                                                                                                                                                                                                                                                                                                                                                                                                             |                                                                                                                                                                                                                                                                                                                                                                                                       |                                                                                                                                                                                                                                                                                                                                                                                                    |                                                                                                                                                                                                                                                                            |                                                                                                                                                                                        |                                                                                                                                                                                                                                    |                                                                                                                                                                                                            |                                                                                                                                                                                                                                                                                                       |                  |                                                                                                                                                                                                                                                                                                                                                                                                                                                                                                                                                                                                                                                                                                                                                                                                                                                                                                                                                                                                                                                                                                                                                                                                                                                                                                                                                                                                                                                                                                                                                                                                                                                                                   |         |         |         |         |         |                                                        |                                                              |                                                                         |                                                                                                         |                                                                                         |                                                               |                                                                                             |                                                                                                    |                                                                                |                                                           |                                                                               |                                                                                                  |                                                       |                                                                                                             |                                                                                                           |
| <p><b>Surgery</b></p>                                                                                                                                                                                                                                                                                                                                                                                        | <p>CC</p>                                                                                                                                                                                                                                                                                                                                                                                                   | <table border="1"> <thead> <tr> <th>Practice Domain</th> <th>Competency</th> <th>Critical Deficiencies</th> <th>LEVEL 1</th> <th>LEVEL 2</th> <th>LEVEL 3</th> <th>LEVEL 4</th> </tr> </thead> <tbody> <tr> <td>Coordination of Care (CC)</td> <td>SYSTEMS-BASED PRACTICE (SBP1)</td> <td>This resident does not have a basic understanding of the resources available for coordinating patient care, including social workers, visiting nurses, and physical and occupational therapists.</td> <td>This resident has a basic understanding of the resources available for coordinating patient care, including social workers, visiting nurses, and physical and occupational therapists.</td> <td>This resident knows the necessary resources to provide optimal coordination of care and how to access them. This resident is aware of specialized services like home total parenteral nutrition (TPN) or home antibiotic infusion.</td> <td>This resident is able to efficiently arrange disposition planning for his or her patients and takes responsibility for preparing all materials necessary for discharge or transfer of his or her patients.</td> <td>This resident coordinates the activities of residents, nurses, social workers, and other health care professionals to provide optimal care to the patient at the time of discharge or transfer, and to provide post-discharge ambulatory care that is appropriate for the patient's particular needs.</td> </tr> </tbody> </table>                                                                                                                                                                                                                                                                                                                                                                                                                                                                                                                                                                                                                                                                                                                                                                       | Practice Domain                                                                                                                                                                                                                                                                                                                                                                                    | Competency                                                                                                                                                                                                                         | Critical Deficiencies                                                                                                                                                                                      | LEVEL 1                                                                                                                                                                                                                                                                                               | LEVEL 2 | LEVEL 3                                                                                                                                                                                                                                                                                                                                                                                                      | LEVEL 4                                                                                                                                                                                                                                                                                                                                                                                                     | Coordination of Care (CC)                                                                                                                                                                                                                                                                                                                                                                             | SYSTEMS-BASED PRACTICE (SBP1)                                                                                                                                                                                                                                                                                                                                                                      | This resident does not have a basic understanding of the resources available for coordinating patient care, including social workers, visiting nurses, and physical and occupational therapists.                                                                           | This resident has a basic understanding of the resources available for coordinating patient care, including social workers, visiting nurses, and physical and occupational therapists. | This resident knows the necessary resources to provide optimal coordination of care and how to access them. This resident is aware of specialized services like home total parenteral nutrition (TPN) or home antibiotic infusion. | This resident is able to efficiently arrange disposition planning for his or her patients and takes responsibility for preparing all materials necessary for discharge or transfer of his or her patients. | This resident coordinates the activities of residents, nurses, social workers, and other health care professionals to provide optimal care to the patient at the time of discharge or transfer, and to provide post-discharge ambulatory care that is appropriate for the patient's particular needs. | <p>PS<br/>QI</p> | <p><b>Systems-Based Practice 1: Patient Safety and Quality Improvement</b></p> <table border="1"> <thead> <tr> <th>Level 1</th> <th>Level 2</th> <th>Level 3</th> <th>Level 4</th> <th>Level 5</th> </tr> </thead> <tbody> <tr> <td>Demonstrates knowledge of common patient safety events</td> <td>Identifies system factors that lead to patient safety events</td> <td>Participates in analysis of patient safety events (simulated or actual)</td> <td>Conducts analysis of patient safety events and offers error prevention strategies (simulated or actual)</td> <td>Actively engages teams and processes to modify systems to prevent patient safety events</td> </tr> <tr> <td>Demonstrates knowledge of how to report patient safety events</td> <td>Reports patient safety events through institutional reporting systems (simulated or actual)</td> <td>Participates in disclosure of patient safety events to patients and families (simulated or actual)</td> <td>Discloses patient safety events to patients and families (simulated or actual)</td> <td>Mentors others in the disclosure of patient safety events</td> </tr> <tr> <td>Demonstrates knowledge of basic quality improvement methodologies and metrics</td> <td>Describes local quality improvement initiatives (e.g., infection rate, hand hygiene, opioid use)</td> <td>Participates in local quality improvement initiatives</td> <td>Demonstrates the skills required to identify, develop, implement, and analyze a quality improvement project</td> <td>Creates, implements, and assesses quality improvement initiatives at the institutional or community level</td> </tr> </tbody> </table> | Level 1 | Level 2 | Level 3 | Level 4 | Level 5 | Demonstrates knowledge of common patient safety events | Identifies system factors that lead to patient safety events | Participates in analysis of patient safety events (simulated or actual) | Conducts analysis of patient safety events and offers error prevention strategies (simulated or actual) | Actively engages teams and processes to modify systems to prevent patient safety events | Demonstrates knowledge of how to report patient safety events | Reports patient safety events through institutional reporting systems (simulated or actual) | Participates in disclosure of patient safety events to patients and families (simulated or actual) | Discloses patient safety events to patients and families (simulated or actual) | Mentors others in the disclosure of patient safety events | Demonstrates knowledge of basic quality improvement methodologies and metrics | Describes local quality improvement initiatives (e.g., infection rate, hand hygiene, opioid use) | Participates in local quality improvement initiatives | Demonstrates the skills required to identify, develop, implement, and analyze a quality improvement project | Creates, implements, and assesses quality improvement initiatives at the institutional or community level |
| Practice Domain                                                                                                                                                                                                                                                                                                                                                                                              | Competency                                                                                                                                                                                                                                                                                                                                                                                                  | Critical Deficiencies                                                                                                                                                                                                                                                                                                                                                                                                                                                                                                                                                                                                                                                                                                                                                                                                                                                                                                                                                                                                                                                                                                                                                                                                                                                                                                                                                                                                                                                                                                                                                                                                                                                                                                                                                                                                                                                                                                                                                                                                                                                                                                                                                                                                                                                        | LEVEL 1                                                                                                                                                                                                                                                                                                                                                                                            | LEVEL 2                                                                                                                                                                                                                            | LEVEL 3                                                                                                                                                                                                    | LEVEL 4                                                                                                                                                                                                                                                                                               |         |                                                                                                                                                                                                                                                                                                                                                                                                              |                                                                                                                                                                                                                                                                                                                                                                                                             |                                                                                                                                                                                                                                                                                                                                                                                                       |                                                                                                                                                                                                                                                                                                                                                                                                    |                                                                                                                                                                                                                                                                            |                                                                                                                                                                                        |                                                                                                                                                                                                                                    |                                                                                                                                                                                                            |                                                                                                                                                                                                                                                                                                       |                  |                                                                                                                                                                                                                                                                                                                                                                                                                                                                                                                                                                                                                                                                                                                                                                                                                                                                                                                                                                                                                                                                                                                                                                                                                                                                                                                                                                                                                                                                                                                                                                                                                                                                                   |         |         |         |         |         |                                                        |                                                              |                                                                         |                                                                                                         |                                                                                         |                                                               |                                                                                             |                                                                                                    |                                                                                |                                                           |                                                                               |                                                                                                  |                                                       |                                                                                                             |                                                                                                           |
| Coordination of Care (CC)                                                                                                                                                                                                                                                                                                                                                                                    | SYSTEMS-BASED PRACTICE (SBP1)                                                                                                                                                                                                                                                                                                                                                                               | This resident does not have a basic understanding of the resources available for coordinating patient care, including social workers, visiting nurses, and physical and occupational therapists.                                                                                                                                                                                                                                                                                                                                                                                                                                                                                                                                                                                                                                                                                                                                                                                                                                                                                                                                                                                                                                                                                                                                                                                                                                                                                                                                                                                                                                                                                                                                                                                                                                                                                                                                                                                                                                                                                                                                                                                                                                                                             | This resident has a basic understanding of the resources available for coordinating patient care, including social workers, visiting nurses, and physical and occupational therapists.                                                                                                                                                                                                             | This resident knows the necessary resources to provide optimal coordination of care and how to access them. This resident is aware of specialized services like home total parenteral nutrition (TPN) or home antibiotic infusion. | This resident is able to efficiently arrange disposition planning for his or her patients and takes responsibility for preparing all materials necessary for discharge or transfer of his or her patients. | This resident coordinates the activities of residents, nurses, social workers, and other health care professionals to provide optimal care to the patient at the time of discharge or transfer, and to provide post-discharge ambulatory care that is appropriate for the patient's particular needs. |         |                                                                                                                                                                                                                                                                                                                                                                                                              |                                                                                                                                                                                                                                                                                                                                                                                                             |                                                                                                                                                                                                                                                                                                                                                                                                       |                                                                                                                                                                                                                                                                                                                                                                                                    |                                                                                                                                                                                                                                                                            |                                                                                                                                                                                        |                                                                                                                                                                                                                                    |                                                                                                                                                                                                            |                                                                                                                                                                                                                                                                                                       |                  |                                                                                                                                                                                                                                                                                                                                                                                                                                                                                                                                                                                                                                                                                                                                                                                                                                                                                                                                                                                                                                                                                                                                                                                                                                                                                                                                                                                                                                                                                                                                                                                                                                                                                   |         |         |         |         |         |                                                        |                                                              |                                                                         |                                                                                                         |                                                                                         |                                                               |                                                                                             |                                                                                                    |                                                                                |                                                           |                                                                               |                                                                                                  |                                                       |                                                                                                             |                                                                                                           |
| Level 1                                                                                                                                                                                                                                                                                                                                                                                                      | Level 2                                                                                                                                                                                                                                                                                                                                                                                                     | Level 3                                                                                                                                                                                                                                                                                                                                                                                                                                                                                                                                                                                                                                                                                                                                                                                                                                                                                                                                                                                                                                                                                                                                                                                                                                                                                                                                                                                                                                                                                                                                                                                                                                                                                                                                                                                                                                                                                                                                                                                                                                                                                                                                                                                                                                                                      | Level 4                                                                                                                                                                                                                                                                                                                                                                                            | Level 5                                                                                                                                                                                                                            |                                                                                                                                                                                                            |                                                                                                                                                                                                                                                                                                       |         |                                                                                                                                                                                                                                                                                                                                                                                                              |                                                                                                                                                                                                                                                                                                                                                                                                             |                                                                                                                                                                                                                                                                                                                                                                                                       |                                                                                                                                                                                                                                                                                                                                                                                                    |                                                                                                                                                                                                                                                                            |                                                                                                                                                                                        |                                                                                                                                                                                                                                    |                                                                                                                                                                                                            |                                                                                                                                                                                                                                                                                                       |                  |                                                                                                                                                                                                                                                                                                                                                                                                                                                                                                                                                                                                                                                                                                                                                                                                                                                                                                                                                                                                                                                                                                                                                                                                                                                                                                                                                                                                                                                                                                                                                                                                                                                                                   |         |         |         |         |         |                                                        |                                                              |                                                                         |                                                                                                         |                                                                                         |                                                               |                                                                                             |                                                                                                    |                                                                                |                                                           |                                                                               |                                                                                                  |                                                       |                                                                                                             |                                                                                                           |
| Demonstrates knowledge of common patient safety events                                                                                                                                                                                                                                                                                                                                                       | Identifies system factors that lead to patient safety events                                                                                                                                                                                                                                                                                                                                                | Participates in analysis of patient safety events (simulated or actual)                                                                                                                                                                                                                                                                                                                                                                                                                                                                                                                                                                                                                                                                                                                                                                                                                                                                                                                                                                                                                                                                                                                                                                                                                                                                                                                                                                                                                                                                                                                                                                                                                                                                                                                                                                                                                                                                                                                                                                                                                                                                                                                                                                                                      | Conducts analysis of patient safety events and offers error prevention strategies (simulated or actual)                                                                                                                                                                                                                                                                                            | Actively engages teams and processes to modify systems to prevent patient safety events                                                                                                                                            |                                                                                                                                                                                                            |                                                                                                                                                                                                                                                                                                       |         |                                                                                                                                                                                                                                                                                                                                                                                                              |                                                                                                                                                                                                                                                                                                                                                                                                             |                                                                                                                                                                                                                                                                                                                                                                                                       |                                                                                                                                                                                                                                                                                                                                                                                                    |                                                                                                                                                                                                                                                                            |                                                                                                                                                                                        |                                                                                                                                                                                                                                    |                                                                                                                                                                                                            |                                                                                                                                                                                                                                                                                                       |                  |                                                                                                                                                                                                                                                                                                                                                                                                                                                                                                                                                                                                                                                                                                                                                                                                                                                                                                                                                                                                                                                                                                                                                                                                                                                                                                                                                                                                                                                                                                                                                                                                                                                                                   |         |         |         |         |         |                                                        |                                                              |                                                                         |                                                                                                         |                                                                                         |                                                               |                                                                                             |                                                                                                    |                                                                                |                                                           |                                                                               |                                                                                                  |                                                       |                                                                                                             |                                                                                                           |
| Demonstrates knowledge of how to report patient safety events                                                                                                                                                                                                                                                                                                                                                | Reports patient safety events through institutional reporting systems (simulated or actual)                                                                                                                                                                                                                                                                                                                 | Participates in disclosure of patient safety events to patients and families (simulated or actual)                                                                                                                                                                                                                                                                                                                                                                                                                                                                                                                                                                                                                                                                                                                                                                                                                                                                                                                                                                                                                                                                                                                                                                                                                                                                                                                                                                                                                                                                                                                                                                                                                                                                                                                                                                                                                                                                                                                                                                                                                                                                                                                                                                           | Discloses patient safety events to patients and families (simulated or actual)                                                                                                                                                                                                                                                                                                                     | Mentors others in the disclosure of patient safety events                                                                                                                                                                          |                                                                                                                                                                                                            |                                                                                                                                                                                                                                                                                                       |         |                                                                                                                                                                                                                                                                                                                                                                                                              |                                                                                                                                                                                                                                                                                                                                                                                                             |                                                                                                                                                                                                                                                                                                                                                                                                       |                                                                                                                                                                                                                                                                                                                                                                                                    |                                                                                                                                                                                                                                                                            |                                                                                                                                                                                        |                                                                                                                                                                                                                                    |                                                                                                                                                                                                            |                                                                                                                                                                                                                                                                                                       |                  |                                                                                                                                                                                                                                                                                                                                                                                                                                                                                                                                                                                                                                                                                                                                                                                                                                                                                                                                                                                                                                                                                                                                                                                                                                                                                                                                                                                                                                                                                                                                                                                                                                                                                   |         |         |         |         |         |                                                        |                                                              |                                                                         |                                                                                                         |                                                                                         |                                                               |                                                                                             |                                                                                                    |                                                                                |                                                           |                                                                               |                                                                                                  |                                                       |                                                                                                             |                                                                                                           |
| Demonstrates knowledge of basic quality improvement methodologies and metrics                                                                                                                                                                                                                                                                                                                                | Describes local quality improvement initiatives (e.g., infection rate, hand hygiene, opioid use)                                                                                                                                                                                                                                                                                                            | Participates in local quality improvement initiatives                                                                                                                                                                                                                                                                                                                                                                                                                                                                                                                                                                                                                                                                                                                                                                                                                                                                                                                                                                                                                                                                                                                                                                                                                                                                                                                                                                                                                                                                                                                                                                                                                                                                                                                                                                                                                                                                                                                                                                                                                                                                                                                                                                                                                        | Demonstrates the skills required to identify, develop, implement, and analyze a quality improvement project                                                                                                                                                                                                                                                                                        | Creates, implements, and assesses quality improvement initiatives at the institutional or community level                                                                                                                          |                                                                                                                                                                                                            |                                                                                                                                                                                                                                                                                                       |         |                                                                                                                                                                                                                                                                                                                                                                                                              |                                                                                                                                                                                                                                                                                                                                                                                                             |                                                                                                                                                                                                                                                                                                                                                                                                       |                                                                                                                                                                                                                                                                                                                                                                                                    |                                                                                                                                                                                                                                                                            |                                                                                                                                                                                        |                                                                                                                                                                                                                                    |                                                                                                                                                                                                            |                                                                                                                                                                                                                                                                                                       |                  |                                                                                                                                                                                                                                                                                                                                                                                                                                                                                                                                                                                                                                                                                                                                                                                                                                                                                                                                                                                                                                                                                                                                                                                                                                                                                                                                                                                                                                                                                                                                                                                                                                                                                   |         |         |         |         |         |                                                        |                                                              |                                                                         |                                                                                                         |                                                                                         |                                                               |                                                                                             |                                                                                                    |                                                                                |                                                           |                                                                               |                                                                                                  |                                                       |                                                                                                             |                                                                                                           |

| <p><b>Surgery</b></p>                                                                                                                                                                                                     | <p>HC Systems</p>                                                                                                                                                                                                                                                                                          | <table border="1"> <tr> <td data-bbox="310 99 373 212"> <p>Improvement of Care (IC)</p> </td> <td data-bbox="373 99 569 212"> <p><b>SYSTEMS-BASED PRACTICE (SBP2)</b><br/>This resident does not demonstrate evidence that he or she considers how hospital and health care systems impact his or her practice.<br/><br/>This resident does not demonstrate awareness of variation in practice within or across health care systems.</p> </td> <td data-bbox="569 99 680 212"> <p>This resident has basic knowledge of how health systems operate.<br/><br/>This resident knows system factors that contribute to medical errors and is aware that variations in care occur.</p> </td> <td data-bbox="680 99 791 212"> <p>This resident understands how patient care is provided in his or her system and recognizes certain specific system failures that can affect patient care.<br/><br/>This resident follows protocols and guidelines for patient care.</p> </td> <td data-bbox="791 99 903 212"> <p>This resident makes suggestions for changes in the health care system that may improve patient care.<br/><br/>This resident reports problems with technology (e.g., devices and automated systems) or processes that could produce medical errors.</p> </td> <td data-bbox="903 99 1016 212"> <p>This resident participates in work groups or performance improvement teams designed to reduce errors and improve health outcomes.<br/><br/>This resident understands the appropriate use of standardized approaches to care and participates in creating such protocols of care.</p> </td> </tr> </table>                                                                                                                                                                                            | <p>Improvement of Care (IC)</p>                                                                                                                                                                                                                                                                                                                                                                                                                               | <p><b>SYSTEMS-BASED PRACTICE (SBP2)</b><br/>This resident does not demonstrate evidence that he or she considers how hospital and health care systems impact his or her practice.<br/><br/>This resident does not demonstrate awareness of variation in practice within or across health care systems.</p>                                                                                                                                                                                                                                                                                                                                                                                                                                                                                                                                                                                                                                                                                                                                                                                                                                                                                                                                                                                                                                                                                                                                                                                                                                                                                              | <p>This resident has basic knowledge of how health systems operate.<br/><br/>This resident knows system factors that contribute to medical errors and is aware that variations in care occur.</p>                                                                                       | <p>This resident understands how patient care is provided in his or her system and recognizes certain specific system failures that can affect patient care.<br/><br/>This resident follows protocols and guidelines for patient care.</p> | <p>This resident makes suggestions for changes in the health care system that may improve patient care.<br/><br/>This resident reports problems with technology (e.g., devices and automated systems) or processes that could produce medical errors.</p> | <p>This resident participates in work groups or performance improvement teams designed to reduce errors and improve health outcomes.<br/><br/>This resident understands the appropriate use of standardized approaches to care and participates in creating such protocols of care.</p> | <p>CC</p> | <table border="1"> <tr> <th colspan="5">Systems-Based Practice 2: System Navigation for Patient-Centered Care</th> </tr> <tr> <th>Level 1</th> <th>Level 2</th> <th>Level 3</th> <th>Level 4</th> <th>Level 5</th> </tr> <tr> <td data-bbox="1123 180 1297 402"> <p>Demonstrates knowledge of care coordination</p> <p>Performs safe and effective transitions of care/hand-offs in routine clinical situations</p> </td> <td data-bbox="1297 180 1472 402"> <p>Coordinates multidisciplinary care of patients in routine clinical situations (e.g., dressing change)</p> <p>Performs safe and effective transitions of care/hand-offs in complex clinical situations</p> </td> <td data-bbox="1472 180 1646 402"> <p>Coordinates and/or leads multidisciplinary care of patients in complex clinical situations (e.g., home parenteral nutrition, postoperative intravenous feeding, intensive care unit)</p> <p>Supervises safe and effective transitions of care/hand-offs of junior residents</p> </td> <td data-bbox="1646 180 1820 402"> <p>Coordinates care of patients with barriers to health care access (e.g., trauma patient with no access to care) or other disparities in care</p> <p>Resolves conflicts in transitions of care between teams</p> </td> <td data-bbox="1820 180 1980 402"> <p>Leads in the design and implementation of improvements to care coordination</p> <p>Leads in the design and implementation of improvements to transitions of care</p> </td> </tr> </table> | Systems-Based Practice 2: System Navigation for Patient-Centered Care |         |                                                                                                                                                                                            |                                                                                                                                                                                                       |                                                                                                                                                                                                                                                                                                         | Level 1                                                                                                                                                                                                                                                                                                                                                                                                                                                       | Level 2                                                                                                                                                                                                                                                                                                                        | Level 3                                                                                                                                                                                                                                                         | Level 4                                                                                                                                                                | Level 5 | <p>Demonstrates knowledge of care coordination</p> <p>Performs safe and effective transitions of care/hand-offs in routine clinical situations</p> | <p>Coordinates multidisciplinary care of patients in routine clinical situations (e.g., dressing change)</p> <p>Performs safe and effective transitions of care/hand-offs in complex clinical situations</p> | <p>Coordinates and/or leads multidisciplinary care of patients in complex clinical situations (e.g., home parenteral nutrition, postoperative intravenous feeding, intensive care unit)</p> <p>Supervises safe and effective transitions of care/hand-offs of junior residents</p> | <p>Coordinates care of patients with barriers to health care access (e.g., trauma patient with no access to care) or other disparities in care</p> <p>Resolves conflicts in transitions of care between teams</p> | <p>Leads in the design and implementation of improvements to care coordination</p> <p>Leads in the design and implementation of improvements to transitions of care</p> |
|---------------------------------------------------------------------------------------------------------------------------------------------------------------------------------------------------------------------------|------------------------------------------------------------------------------------------------------------------------------------------------------------------------------------------------------------------------------------------------------------------------------------------------------------|------------------------------------------------------------------------------------------------------------------------------------------------------------------------------------------------------------------------------------------------------------------------------------------------------------------------------------------------------------------------------------------------------------------------------------------------------------------------------------------------------------------------------------------------------------------------------------------------------------------------------------------------------------------------------------------------------------------------------------------------------------------------------------------------------------------------------------------------------------------------------------------------------------------------------------------------------------------------------------------------------------------------------------------------------------------------------------------------------------------------------------------------------------------------------------------------------------------------------------------------------------------------------------------------------------------------------------------------------------------------------------------------------------------------------------------------------------------------------------------------------------------------------------------------------------------------------------------------------------------------------------------------------------------------------------------------------------------------------------------------------------------------------------------------------------------|---------------------------------------------------------------------------------------------------------------------------------------------------------------------------------------------------------------------------------------------------------------------------------------------------------------------------------------------------------------------------------------------------------------------------------------------------------------|---------------------------------------------------------------------------------------------------------------------------------------------------------------------------------------------------------------------------------------------------------------------------------------------------------------------------------------------------------------------------------------------------------------------------------------------------------------------------------------------------------------------------------------------------------------------------------------------------------------------------------------------------------------------------------------------------------------------------------------------------------------------------------------------------------------------------------------------------------------------------------------------------------------------------------------------------------------------------------------------------------------------------------------------------------------------------------------------------------------------------------------------------------------------------------------------------------------------------------------------------------------------------------------------------------------------------------------------------------------------------------------------------------------------------------------------------------------------------------------------------------------------------------------------------------------------------------------------------------|-----------------------------------------------------------------------------------------------------------------------------------------------------------------------------------------------------------------------------------------------------------------------------------------|--------------------------------------------------------------------------------------------------------------------------------------------------------------------------------------------------------------------------------------------|-----------------------------------------------------------------------------------------------------------------------------------------------------------------------------------------------------------------------------------------------------------|-----------------------------------------------------------------------------------------------------------------------------------------------------------------------------------------------------------------------------------------------------------------------------------------|-----------|--------------------------------------------------------------------------------------------------------------------------------------------------------------------------------------------------------------------------------------------------------------------------------------------------------------------------------------------------------------------------------------------------------------------------------------------------------------------------------------------------------------------------------------------------------------------------------------------------------------------------------------------------------------------------------------------------------------------------------------------------------------------------------------------------------------------------------------------------------------------------------------------------------------------------------------------------------------------------------------------------------------------------------------------------------------------------------------------------------------------------------------------------------------------------------------------------------------------------------------------------------------------------------------------------------------------------------------------------------------------------------------------------------------------------------------------------------------------------------------------------------|-----------------------------------------------------------------------|---------|--------------------------------------------------------------------------------------------------------------------------------------------------------------------------------------------|-------------------------------------------------------------------------------------------------------------------------------------------------------------------------------------------------------|---------------------------------------------------------------------------------------------------------------------------------------------------------------------------------------------------------------------------------------------------------------------------------------------------------|---------------------------------------------------------------------------------------------------------------------------------------------------------------------------------------------------------------------------------------------------------------------------------------------------------------------------------------------------------------------------------------------------------------------------------------------------------------|--------------------------------------------------------------------------------------------------------------------------------------------------------------------------------------------------------------------------------------------------------------------------------------------------------------------------------|-----------------------------------------------------------------------------------------------------------------------------------------------------------------------------------------------------------------------------------------------------------------|------------------------------------------------------------------------------------------------------------------------------------------------------------------------|---------|----------------------------------------------------------------------------------------------------------------------------------------------------|--------------------------------------------------------------------------------------------------------------------------------------------------------------------------------------------------------------|------------------------------------------------------------------------------------------------------------------------------------------------------------------------------------------------------------------------------------------------------------------------------------|-------------------------------------------------------------------------------------------------------------------------------------------------------------------------------------------------------------------|-------------------------------------------------------------------------------------------------------------------------------------------------------------------------|
| <p>Improvement of Care (IC)</p>                                                                                                                                                                                           | <p><b>SYSTEMS-BASED PRACTICE (SBP2)</b><br/>This resident does not demonstrate evidence that he or she considers how hospital and health care systems impact his or her practice.<br/><br/>This resident does not demonstrate awareness of variation in practice within or across health care systems.</p> | <p>This resident has basic knowledge of how health systems operate.<br/><br/>This resident knows system factors that contribute to medical errors and is aware that variations in care occur.</p>                                                                                                                                                                                                                                                                                                                                                                                                                                                                                                                                                                                                                                                                                                                                                                                                                                                                                                                                                                                                                                                                                                                                                                                                                                                                                                                                                                                                                                                                                                                                                                                                                | <p>This resident understands how patient care is provided in his or her system and recognizes certain specific system failures that can affect patient care.<br/><br/>This resident follows protocols and guidelines for patient care.</p>                                                                                                                                                                                                                    | <p>This resident makes suggestions for changes in the health care system that may improve patient care.<br/><br/>This resident reports problems with technology (e.g., devices and automated systems) or processes that could produce medical errors.</p>                                                                                                                                                                                                                                                                                                                                                                                                                                                                                                                                                                                                                                                                                                                                                                                                                                                                                                                                                                                                                                                                                                                                                                                                                                                                                                                                               | <p>This resident participates in work groups or performance improvement teams designed to reduce errors and improve health outcomes.<br/><br/>This resident understands the appropriate use of standardized approaches to care and participates in creating such protocols of care.</p> |                                                                                                                                                                                                                                            |                                                                                                                                                                                                                                                           |                                                                                                                                                                                                                                                                                         |           |                                                                                                                                                                                                                                                                                                                                                                                                                                                                                                                                                                                                                                                                                                                                                                                                                                                                                                                                                                                                                                                                                                                                                                                                                                                                                                                                                                                                                                                                                                        |                                                                       |         |                                                                                                                                                                                            |                                                                                                                                                                                                       |                                                                                                                                                                                                                                                                                                         |                                                                                                                                                                                                                                                                                                                                                                                                                                                               |                                                                                                                                                                                                                                                                                                                                |                                                                                                                                                                                                                                                                 |                                                                                                                                                                        |         |                                                                                                                                                    |                                                                                                                                                                                                              |                                                                                                                                                                                                                                                                                    |                                                                                                                                                                                                                   |                                                                                                                                                                         |
| Systems-Based Practice 2: System Navigation for Patient-Centered Care                                                                                                                                                     |                                                                                                                                                                                                                                                                                                            |                                                                                                                                                                                                                                                                                                                                                                                                                                                                                                                                                                                                                                                                                                                                                                                                                                                                                                                                                                                                                                                                                                                                                                                                                                                                                                                                                                                                                                                                                                                                                                                                                                                                                                                                                                                                                  |                                                                                                                                                                                                                                                                                                                                                                                                                                                               |                                                                                                                                                                                                                                                                                                                                                                                                                                                                                                                                                                                                                                                                                                                                                                                                                                                                                                                                                                                                                                                                                                                                                                                                                                                                                                                                                                                                                                                                                                                                                                                                         |                                                                                                                                                                                                                                                                                         |                                                                                                                                                                                                                                            |                                                                                                                                                                                                                                                           |                                                                                                                                                                                                                                                                                         |           |                                                                                                                                                                                                                                                                                                                                                                                                                                                                                                                                                                                                                                                                                                                                                                                                                                                                                                                                                                                                                                                                                                                                                                                                                                                                                                                                                                                                                                                                                                        |                                                                       |         |                                                                                                                                                                                            |                                                                                                                                                                                                       |                                                                                                                                                                                                                                                                                                         |                                                                                                                                                                                                                                                                                                                                                                                                                                                               |                                                                                                                                                                                                                                                                                                                                |                                                                                                                                                                                                                                                                 |                                                                                                                                                                        |         |                                                                                                                                                    |                                                                                                                                                                                                              |                                                                                                                                                                                                                                                                                    |                                                                                                                                                                                                                   |                                                                                                                                                                         |
| Level 1                                                                                                                                                                                                                   | Level 2                                                                                                                                                                                                                                                                                                    | Level 3                                                                                                                                                                                                                                                                                                                                                                                                                                                                                                                                                                                                                                                                                                                                                                                                                                                                                                                                                                                                                                                                                                                                                                                                                                                                                                                                                                                                                                                                                                                                                                                                                                                                                                                                                                                                          | Level 4                                                                                                                                                                                                                                                                                                                                                                                                                                                       | Level 5                                                                                                                                                                                                                                                                                                                                                                                                                                                                                                                                                                                                                                                                                                                                                                                                                                                                                                                                                                                                                                                                                                                                                                                                                                                                                                                                                                                                                                                                                                                                                                                                 |                                                                                                                                                                                                                                                                                         |                                                                                                                                                                                                                                            |                                                                                                                                                                                                                                                           |                                                                                                                                                                                                                                                                                         |           |                                                                                                                                                                                                                                                                                                                                                                                                                                                                                                                                                                                                                                                                                                                                                                                                                                                                                                                                                                                                                                                                                                                                                                                                                                                                                                                                                                                                                                                                                                        |                                                                       |         |                                                                                                                                                                                            |                                                                                                                                                                                                       |                                                                                                                                                                                                                                                                                                         |                                                                                                                                                                                                                                                                                                                                                                                                                                                               |                                                                                                                                                                                                                                                                                                                                |                                                                                                                                                                                                                                                                 |                                                                                                                                                                        |         |                                                                                                                                                    |                                                                                                                                                                                                              |                                                                                                                                                                                                                                                                                    |                                                                                                                                                                                                                   |                                                                                                                                                                         |
| <p>Demonstrates knowledge of care coordination</p> <p>Performs safe and effective transitions of care/hand-offs in routine clinical situations</p>                                                                        | <p>Coordinates multidisciplinary care of patients in routine clinical situations (e.g., dressing change)</p> <p>Performs safe and effective transitions of care/hand-offs in complex clinical situations</p>                                                                                               | <p>Coordinates and/or leads multidisciplinary care of patients in complex clinical situations (e.g., home parenteral nutrition, postoperative intravenous feeding, intensive care unit)</p> <p>Supervises safe and effective transitions of care/hand-offs of junior residents</p>                                                                                                                                                                                                                                                                                                                                                                                                                                                                                                                                                                                                                                                                                                                                                                                                                                                                                                                                                                                                                                                                                                                                                                                                                                                                                                                                                                                                                                                                                                                               | <p>Coordinates care of patients with barriers to health care access (e.g., trauma patient with no access to care) or other disparities in care</p> <p>Resolves conflicts in transitions of care between teams</p>                                                                                                                                                                                                                                             | <p>Leads in the design and implementation of improvements to care coordination</p> <p>Leads in the design and implementation of improvements to transitions of care</p>                                                                                                                                                                                                                                                                                                                                                                                                                                                                                                                                                                                                                                                                                                                                                                                                                                                                                                                                                                                                                                                                                                                                                                                                                                                                                                                                                                                                                                 |                                                                                                                                                                                                                                                                                         |                                                                                                                                                                                                                                            |                                                                                                                                                                                                                                                           |                                                                                                                                                                                                                                                                                         |           |                                                                                                                                                                                                                                                                                                                                                                                                                                                                                                                                                                                                                                                                                                                                                                                                                                                                                                                                                                                                                                                                                                                                                                                                                                                                                                                                                                                                                                                                                                        |                                                                       |         |                                                                                                                                                                                            |                                                                                                                                                                                                       |                                                                                                                                                                                                                                                                                                         |                                                                                                                                                                                                                                                                                                                                                                                                                                                               |                                                                                                                                                                                                                                                                                                                                |                                                                                                                                                                                                                                                                 |                                                                                                                                                                        |         |                                                                                                                                                    |                                                                                                                                                                                                              |                                                                                                                                                                                                                                                                                    |                                                                                                                                                                                                                   |                                                                                                                                                                         |
| <p><b>Surgery</b></p>                                                                                                                                                                                                     |                                                                                                                                                                                                                                                                                                            |                                                                                                                                                                                                                                                                                                                                                                                                                                                                                                                                                                                                                                                                                                                                                                                                                                                                                                                                                                                                                                                                                                                                                                                                                                                                                                                                                                                                                                                                                                                                                                                                                                                                                                                                                                                                                  | <p>HC Systems</p>                                                                                                                                                                                                                                                                                                                                                                                                                                             | <table border="1"> <tr> <th colspan="5">Systems-Based Practice 3: Physician Role in Health Care Systems</th> </tr> <tr> <th>Level 1</th> <th>Level 2</th> <th>Level 3</th> <th>Level 4</th> <th>Level 5</th> </tr> <tr> <td data-bbox="1123 483 1297 776"> <p>Describes basic health payment systems, including government, private, public, and uninsured care as well as different practice models</p> <p>Describes the key components of documentation for billing and coding</p> </td> <td data-bbox="1297 483 1472 776"> <p>Describes how working within the health care system impacts patient care</p> <p>Documents the key components required for billing and coding</p> </td> <td data-bbox="1472 483 1646 776"> <p>Analyzes how personal practice affects the system (e.g., length of stay, readmission rates, clinical efficiency)</p> <p>Describes basic elements needed to transition to practice (e.g., contract negotiations, malpractice insurance, government regulation, compliance, Medicare Access and CHIP Reauthorization Act)</p> </td> <td data-bbox="1646 483 1820 776"> <p>Uses shared decision making in patient care, taking into consideration costs to the patient</p> <p>Identifies resources and effectively plans for transition to practice (e.g., information technology, legal, billing and coding, financial, personnel)</p> </td> <td data-bbox="1820 483 1980 776"> <p>Advocates or leads change to enhance systems for high-value, efficient, and effective patient care</p> <p>Participates in advocacy activities for health policy</p> </td> </tr> </table> | Systems-Based Practice 3: Physician Role in Health Care Systems                                                                                                                                                                                                                         |                                                                                                                                                                                                                                            |                                                                                                                                                                                                                                                           |                                                                                                                                                                                                                                                                                         |           | Level 1                                                                                                                                                                                                                                                                                                                                                                                                                                                                                                                                                                                                                                                                                                                                                                                                                                                                                                                                                                                                                                                                                                                                                                                                                                                                                                                                                                                                                                                                                                | Level 2                                                               | Level 3 | Level 4                                                                                                                                                                                    | Level 5                                                                                                                                                                                               | <p>Describes basic health payment systems, including government, private, public, and uninsured care as well as different practice models</p> <p>Describes the key components of documentation for billing and coding</p>                                                                               | <p>Describes how working within the health care system impacts patient care</p> <p>Documents the key components required for billing and coding</p>                                                                                                                                                                                                                                                                                                           | <p>Analyzes how personal practice affects the system (e.g., length of stay, readmission rates, clinical efficiency)</p> <p>Describes basic elements needed to transition to practice (e.g., contract negotiations, malpractice insurance, government regulation, compliance, Medicare Access and CHIP Reauthorization Act)</p> | <p>Uses shared decision making in patient care, taking into consideration costs to the patient</p> <p>Identifies resources and effectively plans for transition to practice (e.g., information technology, legal, billing and coding, financial, personnel)</p> | <p>Advocates or leads change to enhance systems for high-value, efficient, and effective patient care</p> <p>Participates in advocacy activities for health policy</p> |         |                                                                                                                                                    |                                                                                                                                                                                                              |                                                                                                                                                                                                                                                                                    |                                                                                                                                                                                                                   |                                                                                                                                                                         |
| Systems-Based Practice 3: Physician Role in Health Care Systems                                                                                                                                                           |                                                                                                                                                                                                                                                                                                            |                                                                                                                                                                                                                                                                                                                                                                                                                                                                                                                                                                                                                                                                                                                                                                                                                                                                                                                                                                                                                                                                                                                                                                                                                                                                                                                                                                                                                                                                                                                                                                                                                                                                                                                                                                                                                  |                                                                                                                                                                                                                                                                                                                                                                                                                                                               |                                                                                                                                                                                                                                                                                                                                                                                                                                                                                                                                                                                                                                                                                                                                                                                                                                                                                                                                                                                                                                                                                                                                                                                                                                                                                                                                                                                                                                                                                                                                                                                                         |                                                                                                                                                                                                                                                                                         |                                                                                                                                                                                                                                            |                                                                                                                                                                                                                                                           |                                                                                                                                                                                                                                                                                         |           |                                                                                                                                                                                                                                                                                                                                                                                                                                                                                                                                                                                                                                                                                                                                                                                                                                                                                                                                                                                                                                                                                                                                                                                                                                                                                                                                                                                                                                                                                                        |                                                                       |         |                                                                                                                                                                                            |                                                                                                                                                                                                       |                                                                                                                                                                                                                                                                                                         |                                                                                                                                                                                                                                                                                                                                                                                                                                                               |                                                                                                                                                                                                                                                                                                                                |                                                                                                                                                                                                                                                                 |                                                                                                                                                                        |         |                                                                                                                                                    |                                                                                                                                                                                                              |                                                                                                                                                                                                                                                                                    |                                                                                                                                                                                                                   |                                                                                                                                                                         |
| Level 1                                                                                                                                                                                                                   | Level 2                                                                                                                                                                                                                                                                                                    | Level 3                                                                                                                                                                                                                                                                                                                                                                                                                                                                                                                                                                                                                                                                                                                                                                                                                                                                                                                                                                                                                                                                                                                                                                                                                                                                                                                                                                                                                                                                                                                                                                                                                                                                                                                                                                                                          | Level 4                                                                                                                                                                                                                                                                                                                                                                                                                                                       | Level 5                                                                                                                                                                                                                                                                                                                                                                                                                                                                                                                                                                                                                                                                                                                                                                                                                                                                                                                                                                                                                                                                                                                                                                                                                                                                                                                                                                                                                                                                                                                                                                                                 |                                                                                                                                                                                                                                                                                         |                                                                                                                                                                                                                                            |                                                                                                                                                                                                                                                           |                                                                                                                                                                                                                                                                                         |           |                                                                                                                                                                                                                                                                                                                                                                                                                                                                                                                                                                                                                                                                                                                                                                                                                                                                                                                                                                                                                                                                                                                                                                                                                                                                                                                                                                                                                                                                                                        |                                                                       |         |                                                                                                                                                                                            |                                                                                                                                                                                                       |                                                                                                                                                                                                                                                                                                         |                                                                                                                                                                                                                                                                                                                                                                                                                                                               |                                                                                                                                                                                                                                                                                                                                |                                                                                                                                                                                                                                                                 |                                                                                                                                                                        |         |                                                                                                                                                    |                                                                                                                                                                                                              |                                                                                                                                                                                                                                                                                    |                                                                                                                                                                                                                   |                                                                                                                                                                         |
| <p>Describes basic health payment systems, including government, private, public, and uninsured care as well as different practice models</p> <p>Describes the key components of documentation for billing and coding</p> | <p>Describes how working within the health care system impacts patient care</p> <p>Documents the key components required for billing and coding</p>                                                                                                                                                        | <p>Analyzes how personal practice affects the system (e.g., length of stay, readmission rates, clinical efficiency)</p> <p>Describes basic elements needed to transition to practice (e.g., contract negotiations, malpractice insurance, government regulation, compliance, Medicare Access and CHIP Reauthorization Act)</p>                                                                                                                                                                                                                                                                                                                                                                                                                                                                                                                                                                                                                                                                                                                                                                                                                                                                                                                                                                                                                                                                                                                                                                                                                                                                                                                                                                                                                                                                                   | <p>Uses shared decision making in patient care, taking into consideration costs to the patient</p> <p>Identifies resources and effectively plans for transition to practice (e.g., information technology, legal, billing and coding, financial, personnel)</p>                                                                                                                                                                                               | <p>Advocates or leads change to enhance systems for high-value, efficient, and effective patient care</p> <p>Participates in advocacy activities for health policy</p>                                                                                                                                                                                                                                                                                                                                                                                                                                                                                                                                                                                                                                                                                                                                                                                                                                                                                                                                                                                                                                                                                                                                                                                                                                                                                                                                                                                                                                  |                                                                                                                                                                                                                                                                                         |                                                                                                                                                                                                                                            |                                                                                                                                                                                                                                                           |                                                                                                                                                                                                                                                                                         |           |                                                                                                                                                                                                                                                                                                                                                                                                                                                                                                                                                                                                                                                                                                                                                                                                                                                                                                                                                                                                                                                                                                                                                                                                                                                                                                                                                                                                                                                                                                        |                                                                       |         |                                                                                                                                                                                            |                                                                                                                                                                                                       |                                                                                                                                                                                                                                                                                                         |                                                                                                                                                                                                                                                                                                                                                                                                                                                               |                                                                                                                                                                                                                                                                                                                                |                                                                                                                                                                                                                                                                 |                                                                                                                                                                        |         |                                                                                                                                                    |                                                                                                                                                                                                              |                                                                                                                                                                                                                                                                                    |                                                                                                                                                                                                                   |                                                                                                                                                                         |
| <p><b>Thoracic Surgery</b></p>                                                                                                                                                                                            | <p>PS Teams</p>                                                                                                                                                                                                                                                                                            | <table border="1"> <tr> <th colspan="5">Patient Safety — Systems-based Practice</th> </tr> <tr> <th>Level 1</th> <th>Level 2</th> <th>Level 3</th> <th>Level 4</th> <th>Level 5</th> </tr> <tr> <td data-bbox="310 829 457 1044"> <ul style="list-style-type: none"> <li>Understands the differences between medical errors, near misses, and sentinel events</li> <li>Understands the roles of care team members</li> </ul> </td> <td data-bbox="457 829 604 1044"> <ul style="list-style-type: none"> <li>Participates in the use of tools to prevent adverse events (e.g., checklists and briefings)</li> <li>Describes the common system causes for errors</li> </ul> </td> <td data-bbox="604 829 751 1044"> <ul style="list-style-type: none"> <li>Consistently uses tools to prevent adverse events (e.g., checklists and briefings)</li> <li>Reports problematic behaviors, processes, and devices, including errors and near misses</li> <li>Demonstrates structured communication tool for hand-offs</li> </ul> </td> <td data-bbox="751 829 898 1044"> <ul style="list-style-type: none"> <li>Participates in the analysis of shared team experiences to prevent future errors using proven analysis techniques (e.g., root cause analysis, failure mode effects analysis)</li> <li>Leads team by promoting situational awareness and input by all team members</li> <li>Conducts morbidity and mortality conferences to improve patient safety</li> </ul> </td> <td data-bbox="898 829 1016 1044"> <ul style="list-style-type: none"> <li>Leads curriculum design to teach teamwork and communication skills to health care professionals</li> <li>Leads multidisciplinary teams (e.g., human factors engineers, social scientists) to address patient safety issues</li> </ul> </td> </tr> </table> | Patient Safety — Systems-based Practice                                                                                                                                                                                                                                                                                                                                                                                                                       |                                                                                                                                                                                                                                                                                                                                                                                                                                                                                                                                                                                                                                                                                                                                                                                                                                                                                                                                                                                                                                                                                                                                                                                                                                                                                                                                                                                                                                                                                                                                                                                                         |                                                                                                                                                                                                                                                                                         |                                                                                                                                                                                                                                            |                                                                                                                                                                                                                                                           | Level 1                                                                                                                                                                                                                                                                                 | Level 2   | Level 3                                                                                                                                                                                                                                                                                                                                                                                                                                                                                                                                                                                                                                                                                                                                                                                                                                                                                                                                                                                                                                                                                                                                                                                                                                                                                                                                                                                                                                                                                                | Level 4                                                               | Level 5 | <ul style="list-style-type: none"> <li>Understands the differences between medical errors, near misses, and sentinel events</li> <li>Understands the roles of care team members</li> </ul> | <ul style="list-style-type: none"> <li>Participates in the use of tools to prevent adverse events (e.g., checklists and briefings)</li> <li>Describes the common system causes for errors</li> </ul>  | <ul style="list-style-type: none"> <li>Consistently uses tools to prevent adverse events (e.g., checklists and briefings)</li> <li>Reports problematic behaviors, processes, and devices, including errors and near misses</li> <li>Demonstrates structured communication tool for hand-offs</li> </ul> | <ul style="list-style-type: none"> <li>Participates in the analysis of shared team experiences to prevent future errors using proven analysis techniques (e.g., root cause analysis, failure mode effects analysis)</li> <li>Leads team by promoting situational awareness and input by all team members</li> <li>Conducts morbidity and mortality conferences to improve patient safety</li> </ul>                                                           | <ul style="list-style-type: none"> <li>Leads curriculum design to teach teamwork and communication skills to health care professionals</li> <li>Leads multidisciplinary teams (e.g., human factors engineers, social scientists) to address patient safety issues</li> </ul>                                                   |                                                                                                                                                                                                                                                                 |                                                                                                                                                                        |         |                                                                                                                                                    |                                                                                                                                                                                                              |                                                                                                                                                                                                                                                                                    |                                                                                                                                                                                                                   |                                                                                                                                                                         |
| Patient Safety — Systems-based Practice                                                                                                                                                                                   |                                                                                                                                                                                                                                                                                                            |                                                                                                                                                                                                                                                                                                                                                                                                                                                                                                                                                                                                                                                                                                                                                                                                                                                                                                                                                                                                                                                                                                                                                                                                                                                                                                                                                                                                                                                                                                                                                                                                                                                                                                                                                                                                                  |                                                                                                                                                                                                                                                                                                                                                                                                                                                               |                                                                                                                                                                                                                                                                                                                                                                                                                                                                                                                                                                                                                                                                                                                                                                                                                                                                                                                                                                                                                                                                                                                                                                                                                                                                                                                                                                                                                                                                                                                                                                                                         |                                                                                                                                                                                                                                                                                         |                                                                                                                                                                                                                                            |                                                                                                                                                                                                                                                           |                                                                                                                                                                                                                                                                                         |           |                                                                                                                                                                                                                                                                                                                                                                                                                                                                                                                                                                                                                                                                                                                                                                                                                                                                                                                                                                                                                                                                                                                                                                                                                                                                                                                                                                                                                                                                                                        |                                                                       |         |                                                                                                                                                                                            |                                                                                                                                                                                                       |                                                                                                                                                                                                                                                                                                         |                                                                                                                                                                                                                                                                                                                                                                                                                                                               |                                                                                                                                                                                                                                                                                                                                |                                                                                                                                                                                                                                                                 |                                                                                                                                                                        |         |                                                                                                                                                    |                                                                                                                                                                                                              |                                                                                                                                                                                                                                                                                    |                                                                                                                                                                                                                   |                                                                                                                                                                         |
| Level 1                                                                                                                                                                                                                   | Level 2                                                                                                                                                                                                                                                                                                    | Level 3                                                                                                                                                                                                                                                                                                                                                                                                                                                                                                                                                                                                                                                                                                                                                                                                                                                                                                                                                                                                                                                                                                                                                                                                                                                                                                                                                                                                                                                                                                                                                                                                                                                                                                                                                                                                          | Level 4                                                                                                                                                                                                                                                                                                                                                                                                                                                       | Level 5                                                                                                                                                                                                                                                                                                                                                                                                                                                                                                                                                                                                                                                                                                                                                                                                                                                                                                                                                                                                                                                                                                                                                                                                                                                                                                                                                                                                                                                                                                                                                                                                 |                                                                                                                                                                                                                                                                                         |                                                                                                                                                                                                                                            |                                                                                                                                                                                                                                                           |                                                                                                                                                                                                                                                                                         |           |                                                                                                                                                                                                                                                                                                                                                                                                                                                                                                                                                                                                                                                                                                                                                                                                                                                                                                                                                                                                                                                                                                                                                                                                                                                                                                                                                                                                                                                                                                        |                                                                       |         |                                                                                                                                                                                            |                                                                                                                                                                                                       |                                                                                                                                                                                                                                                                                                         |                                                                                                                                                                                                                                                                                                                                                                                                                                                               |                                                                                                                                                                                                                                                                                                                                |                                                                                                                                                                                                                                                                 |                                                                                                                                                                        |         |                                                                                                                                                    |                                                                                                                                                                                                              |                                                                                                                                                                                                                                                                                    |                                                                                                                                                                                                                   |                                                                                                                                                                         |
| <ul style="list-style-type: none"> <li>Understands the differences between medical errors, near misses, and sentinel events</li> <li>Understands the roles of care team members</li> </ul>                                | <ul style="list-style-type: none"> <li>Participates in the use of tools to prevent adverse events (e.g., checklists and briefings)</li> <li>Describes the common system causes for errors</li> </ul>                                                                                                       | <ul style="list-style-type: none"> <li>Consistently uses tools to prevent adverse events (e.g., checklists and briefings)</li> <li>Reports problematic behaviors, processes, and devices, including errors and near misses</li> <li>Demonstrates structured communication tool for hand-offs</li> </ul>                                                                                                                                                                                                                                                                                                                                                                                                                                                                                                                                                                                                                                                                                                                                                                                                                                                                                                                                                                                                                                                                                                                                                                                                                                                                                                                                                                                                                                                                                                          | <ul style="list-style-type: none"> <li>Participates in the analysis of shared team experiences to prevent future errors using proven analysis techniques (e.g., root cause analysis, failure mode effects analysis)</li> <li>Leads team by promoting situational awareness and input by all team members</li> <li>Conducts morbidity and mortality conferences to improve patient safety</li> </ul>                                                           | <ul style="list-style-type: none"> <li>Leads curriculum design to teach teamwork and communication skills to health care professionals</li> <li>Leads multidisciplinary teams (e.g., human factors engineers, social scientists) to address patient safety issues</li> </ul>                                                                                                                                                                                                                                                                                                                                                                                                                                                                                                                                                                                                                                                                                                                                                                                                                                                                                                                                                                                                                                                                                                                                                                                                                                                                                                                            |                                                                                                                                                                                                                                                                                         |                                                                                                                                                                                                                                            |                                                                                                                                                                                                                                                           |                                                                                                                                                                                                                                                                                         |           |                                                                                                                                                                                                                                                                                                                                                                                                                                                                                                                                                                                                                                                                                                                                                                                                                                                                                                                                                                                                                                                                                                                                                                                                                                                                                                                                                                                                                                                                                                        |                                                                       |         |                                                                                                                                                                                            |                                                                                                                                                                                                       |                                                                                                                                                                                                                                                                                                         |                                                                                                                                                                                                                                                                                                                                                                                                                                                               |                                                                                                                                                                                                                                                                                                                                |                                                                                                                                                                                                                                                                 |                                                                                                                                                                        |         |                                                                                                                                                    |                                                                                                                                                                                                              |                                                                                                                                                                                                                                                                                    |                                                                                                                                                                                                                   |                                                                                                                                                                         |
| <p><b>Thoracic Surgery</b></p>                                                                                                                                                                                            | <p>HC Costs and Resources</p>                                                                                                                                                                                                                                                                              | <table border="1"> <tr> <th colspan="5">Resource Allocation — Systems-based Practice</th> </tr> <tr> <th>Level 1</th> <th>Level 2</th> <th>Level 3</th> <th>Level 4</th> <th>Level 5</th> </tr> <tr> <td data-bbox="310 1081 457 1190"> <ul style="list-style-type: none"> <li>Describes practice variations in resource consumption, such as the utilization of diagnostic tests</li> </ul> </td> <td data-bbox="457 1081 604 1190"> <ul style="list-style-type: none"> <li>Describes the cost implications of using resources and practice variation</li> </ul> </td> <td data-bbox="604 1081 751 1190"> <ul style="list-style-type: none"> <li>Participates in responsible use of health care resources seeking appropriate assistance</li> </ul> </td> <td data-bbox="751 1081 898 1190"> <ul style="list-style-type: none"> <li>Practices cost effective care (e.g., managing length of stay, operative efficiency)</li> </ul> </td> <td data-bbox="898 1081 1016 1190"> <ul style="list-style-type: none"> <li>Designs measurement tools to monitor and provide feedback to providers/teams on resource consumption to facilitate improvement</li> </ul> </td> </tr> </table>                                                                                                                                                                                                                                                                                                                                                                                                                                                                                                                                                                                                                              | Resource Allocation — Systems-based Practice                                                                                                                                                                                                                                                                                                                                                                                                                  |                                                                                                                                                                                                                                                                                                                                                                                                                                                                                                                                                                                                                                                                                                                                                                                                                                                                                                                                                                                                                                                                                                                                                                                                                                                                                                                                                                                                                                                                                                                                                                                                         |                                                                                                                                                                                                                                                                                         |                                                                                                                                                                                                                                            |                                                                                                                                                                                                                                                           | Level 1                                                                                                                                                                                                                                                                                 | Level 2   | Level 3                                                                                                                                                                                                                                                                                                                                                                                                                                                                                                                                                                                                                                                                                                                                                                                                                                                                                                                                                                                                                                                                                                                                                                                                                                                                                                                                                                                                                                                                                                | Level 4                                                               | Level 5 | <ul style="list-style-type: none"> <li>Describes practice variations in resource consumption, such as the utilization of diagnostic tests</li> </ul>                                       | <ul style="list-style-type: none"> <li>Describes the cost implications of using resources and practice variation</li> </ul>                                                                           | <ul style="list-style-type: none"> <li>Participates in responsible use of health care resources seeking appropriate assistance</li> </ul>                                                                                                                                                               | <ul style="list-style-type: none"> <li>Practices cost effective care (e.g., managing length of stay, operative efficiency)</li> </ul>                                                                                                                                                                                                                                                                                                                         | <ul style="list-style-type: none"> <li>Designs measurement tools to monitor and provide feedback to providers/teams on resource consumption to facilitate improvement</li> </ul>                                                                                                                                               |                                                                                                                                                                                                                                                                 |                                                                                                                                                                        |         |                                                                                                                                                    |                                                                                                                                                                                                              |                                                                                                                                                                                                                                                                                    |                                                                                                                                                                                                                   |                                                                                                                                                                         |
| Resource Allocation — Systems-based Practice                                                                                                                                                                              |                                                                                                                                                                                                                                                                                                            |                                                                                                                                                                                                                                                                                                                                                                                                                                                                                                                                                                                                                                                                                                                                                                                                                                                                                                                                                                                                                                                                                                                                                                                                                                                                                                                                                                                                                                                                                                                                                                                                                                                                                                                                                                                                                  |                                                                                                                                                                                                                                                                                                                                                                                                                                                               |                                                                                                                                                                                                                                                                                                                                                                                                                                                                                                                                                                                                                                                                                                                                                                                                                                                                                                                                                                                                                                                                                                                                                                                                                                                                                                                                                                                                                                                                                                                                                                                                         |                                                                                                                                                                                                                                                                                         |                                                                                                                                                                                                                                            |                                                                                                                                                                                                                                                           |                                                                                                                                                                                                                                                                                         |           |                                                                                                                                                                                                                                                                                                                                                                                                                                                                                                                                                                                                                                                                                                                                                                                                                                                                                                                                                                                                                                                                                                                                                                                                                                                                                                                                                                                                                                                                                                        |                                                                       |         |                                                                                                                                                                                            |                                                                                                                                                                                                       |                                                                                                                                                                                                                                                                                                         |                                                                                                                                                                                                                                                                                                                                                                                                                                                               |                                                                                                                                                                                                                                                                                                                                |                                                                                                                                                                                                                                                                 |                                                                                                                                                                        |         |                                                                                                                                                    |                                                                                                                                                                                                              |                                                                                                                                                                                                                                                                                    |                                                                                                                                                                                                                   |                                                                                                                                                                         |
| Level 1                                                                                                                                                                                                                   | Level 2                                                                                                                                                                                                                                                                                                    | Level 3                                                                                                                                                                                                                                                                                                                                                                                                                                                                                                                                                                                                                                                                                                                                                                                                                                                                                                                                                                                                                                                                                                                                                                                                                                                                                                                                                                                                                                                                                                                                                                                                                                                                                                                                                                                                          | Level 4                                                                                                                                                                                                                                                                                                                                                                                                                                                       | Level 5                                                                                                                                                                                                                                                                                                                                                                                                                                                                                                                                                                                                                                                                                                                                                                                                                                                                                                                                                                                                                                                                                                                                                                                                                                                                                                                                                                                                                                                                                                                                                                                                 |                                                                                                                                                                                                                                                                                         |                                                                                                                                                                                                                                            |                                                                                                                                                                                                                                                           |                                                                                                                                                                                                                                                                                         |           |                                                                                                                                                                                                                                                                                                                                                                                                                                                                                                                                                                                                                                                                                                                                                                                                                                                                                                                                                                                                                                                                                                                                                                                                                                                                                                                                                                                                                                                                                                        |                                                                       |         |                                                                                                                                                                                            |                                                                                                                                                                                                       |                                                                                                                                                                                                                                                                                                         |                                                                                                                                                                                                                                                                                                                                                                                                                                                               |                                                                                                                                                                                                                                                                                                                                |                                                                                                                                                                                                                                                                 |                                                                                                                                                                        |         |                                                                                                                                                    |                                                                                                                                                                                                              |                                                                                                                                                                                                                                                                                    |                                                                                                                                                                                                                   |                                                                                                                                                                         |
| <ul style="list-style-type: none"> <li>Describes practice variations in resource consumption, such as the utilization of diagnostic tests</li> </ul>                                                                      | <ul style="list-style-type: none"> <li>Describes the cost implications of using resources and practice variation</li> </ul>                                                                                                                                                                                | <ul style="list-style-type: none"> <li>Participates in responsible use of health care resources seeking appropriate assistance</li> </ul>                                                                                                                                                                                                                                                                                                                                                                                                                                                                                                                                                                                                                                                                                                                                                                                                                                                                                                                                                                                                                                                                                                                                                                                                                                                                                                                                                                                                                                                                                                                                                                                                                                                                        | <ul style="list-style-type: none"> <li>Practices cost effective care (e.g., managing length of stay, operative efficiency)</li> </ul>                                                                                                                                                                                                                                                                                                                         | <ul style="list-style-type: none"> <li>Designs measurement tools to monitor and provide feedback to providers/teams on resource consumption to facilitate improvement</li> </ul>                                                                                                                                                                                                                                                                                                                                                                                                                                                                                                                                                                                                                                                                                                                                                                                                                                                                                                                                                                                                                                                                                                                                                                                                                                                                                                                                                                                                                        |                                                                                                                                                                                                                                                                                         |                                                                                                                                                                                                                                            |                                                                                                                                                                                                                                                           |                                                                                                                                                                                                                                                                                         |           |                                                                                                                                                                                                                                                                                                                                                                                                                                                                                                                                                                                                                                                                                                                                                                                                                                                                                                                                                                                                                                                                                                                                                                                                                                                                                                                                                                                                                                                                                                        |                                                                       |         |                                                                                                                                                                                            |                                                                                                                                                                                                       |                                                                                                                                                                                                                                                                                                         |                                                                                                                                                                                                                                                                                                                                                                                                                                                               |                                                                                                                                                                                                                                                                                                                                |                                                                                                                                                                                                                                                                 |                                                                                                                                                                        |         |                                                                                                                                                    |                                                                                                                                                                                                              |                                                                                                                                                                                                                                                                                    |                                                                                                                                                                                                                   |                                                                                                                                                                         |
| <p><b>Thoracic Surgery</b></p>                                                                                                                                                                                            | <p>HC Systems</p>                                                                                                                                                                                                                                                                                          | <table border="1"> <tr> <th colspan="5">Practice Management — Systems-based Practice</th> </tr> <tr> <th>Level 1</th> <th>Level 2</th> <th>Level 3</th> <th>Level 4</th> <th>Level 5</th> </tr> <tr> <td data-bbox="310 1227 457 1510"> <ul style="list-style-type: none"> <li>Understands basic health payment systems, including uninsured care</li> <li>Uses EMR appropriately</li> </ul> </td> <td data-bbox="457 1227 604 1510"> <ul style="list-style-type: none"> <li>Understands the importance of documentation for coding</li> <li>Able to document inpatient diagnoses</li> <li>Understands different practice models</li> </ul> </td> <td data-bbox="604 1227 751 1510"> <ul style="list-style-type: none"> <li>Understands principles of diagnosis, evaluation and management, and procedure coding</li> <li>Compares and contrasts different practice models</li> </ul> </td> <td data-bbox="751 1227 898 1510"> <ul style="list-style-type: none"> <li>Codes routine diagnoses, encounters, and surgical procedures; documents medical necessity</li> <li>Recognizes basic elements needed to establish practice (e.g., negotiations, malpractice insurance, contracts, staffing, compliance, facility accreditation)</li> <li>Establishes timeline and identifies resources for transition to practice (e.g. information technology, legal, financial, personnel)</li> </ul> </td> <td data-bbox="898 1227 1016 1510"> <ul style="list-style-type: none"> <li>Participates in advocacy activities for health policy</li> <li>Creates curriculum to teach practice management</li> <li>Codes complex and unusual diagnoses, encounters and surgical procedures</li> </ul> </td> </tr> </table>                                                                                                    | Practice Management — Systems-based Practice                                                                                                                                                                                                                                                                                                                                                                                                                  |                                                                                                                                                                                                                                                                                                                                                                                                                                                                                                                                                                                                                                                                                                                                                                                                                                                                                                                                                                                                                                                                                                                                                                                                                                                                                                                                                                                                                                                                                                                                                                                                         |                                                                                                                                                                                                                                                                                         |                                                                                                                                                                                                                                            |                                                                                                                                                                                                                                                           | Level 1                                                                                                                                                                                                                                                                                 | Level 2   | Level 3                                                                                                                                                                                                                                                                                                                                                                                                                                                                                                                                                                                                                                                                                                                                                                                                                                                                                                                                                                                                                                                                                                                                                                                                                                                                                                                                                                                                                                                                                                | Level 4                                                               | Level 5 | <ul style="list-style-type: none"> <li>Understands basic health payment systems, including uninsured care</li> <li>Uses EMR appropriately</li> </ul>                                       | <ul style="list-style-type: none"> <li>Understands the importance of documentation for coding</li> <li>Able to document inpatient diagnoses</li> <li>Understands different practice models</li> </ul> | <ul style="list-style-type: none"> <li>Understands principles of diagnosis, evaluation and management, and procedure coding</li> <li>Compares and contrasts different practice models</li> </ul>                                                                                                        | <ul style="list-style-type: none"> <li>Codes routine diagnoses, encounters, and surgical procedures; documents medical necessity</li> <li>Recognizes basic elements needed to establish practice (e.g., negotiations, malpractice insurance, contracts, staffing, compliance, facility accreditation)</li> <li>Establishes timeline and identifies resources for transition to practice (e.g. information technology, legal, financial, personnel)</li> </ul> | <ul style="list-style-type: none"> <li>Participates in advocacy activities for health policy</li> <li>Creates curriculum to teach practice management</li> <li>Codes complex and unusual diagnoses, encounters and surgical procedures</li> </ul>                                                                              |                                                                                                                                                                                                                                                                 |                                                                                                                                                                        |         |                                                                                                                                                    |                                                                                                                                                                                                              |                                                                                                                                                                                                                                                                                    |                                                                                                                                                                                                                   |                                                                                                                                                                         |
| Practice Management — Systems-based Practice                                                                                                                                                                              |                                                                                                                                                                                                                                                                                                            |                                                                                                                                                                                                                                                                                                                                                                                                                                                                                                                                                                                                                                                                                                                                                                                                                                                                                                                                                                                                                                                                                                                                                                                                                                                                                                                                                                                                                                                                                                                                                                                                                                                                                                                                                                                                                  |                                                                                                                                                                                                                                                                                                                                                                                                                                                               |                                                                                                                                                                                                                                                                                                                                                                                                                                                                                                                                                                                                                                                                                                                                                                                                                                                                                                                                                                                                                                                                                                                                                                                                                                                                                                                                                                                                                                                                                                                                                                                                         |                                                                                                                                                                                                                                                                                         |                                                                                                                                                                                                                                            |                                                                                                                                                                                                                                                           |                                                                                                                                                                                                                                                                                         |           |                                                                                                                                                                                                                                                                                                                                                                                                                                                                                                                                                                                                                                                                                                                                                                                                                                                                                                                                                                                                                                                                                                                                                                                                                                                                                                                                                                                                                                                                                                        |                                                                       |         |                                                                                                                                                                                            |                                                                                                                                                                                                       |                                                                                                                                                                                                                                                                                                         |                                                                                                                                                                                                                                                                                                                                                                                                                                                               |                                                                                                                                                                                                                                                                                                                                |                                                                                                                                                                                                                                                                 |                                                                                                                                                                        |         |                                                                                                                                                    |                                                                                                                                                                                                              |                                                                                                                                                                                                                                                                                    |                                                                                                                                                                                                                   |                                                                                                                                                                         |
| Level 1                                                                                                                                                                                                                   | Level 2                                                                                                                                                                                                                                                                                                    | Level 3                                                                                                                                                                                                                                                                                                                                                                                                                                                                                                                                                                                                                                                                                                                                                                                                                                                                                                                                                                                                                                                                                                                                                                                                                                                                                                                                                                                                                                                                                                                                                                                                                                                                                                                                                                                                          | Level 4                                                                                                                                                                                                                                                                                                                                                                                                                                                       | Level 5                                                                                                                                                                                                                                                                                                                                                                                                                                                                                                                                                                                                                                                                                                                                                                                                                                                                                                                                                                                                                                                                                                                                                                                                                                                                                                                                                                                                                                                                                                                                                                                                 |                                                                                                                                                                                                                                                                                         |                                                                                                                                                                                                                                            |                                                                                                                                                                                                                                                           |                                                                                                                                                                                                                                                                                         |           |                                                                                                                                                                                                                                                                                                                                                                                                                                                                                                                                                                                                                                                                                                                                                                                                                                                                                                                                                                                                                                                                                                                                                                                                                                                                                                                                                                                                                                                                                                        |                                                                       |         |                                                                                                                                                                                            |                                                                                                                                                                                                       |                                                                                                                                                                                                                                                                                                         |                                                                                                                                                                                                                                                                                                                                                                                                                                                               |                                                                                                                                                                                                                                                                                                                                |                                                                                                                                                                                                                                                                 |                                                                                                                                                                        |         |                                                                                                                                                    |                                                                                                                                                                                                              |                                                                                                                                                                                                                                                                                    |                                                                                                                                                                                                                   |                                                                                                                                                                         |
| <ul style="list-style-type: none"> <li>Understands basic health payment systems, including uninsured care</li> <li>Uses EMR appropriately</li> </ul>                                                                      | <ul style="list-style-type: none"> <li>Understands the importance of documentation for coding</li> <li>Able to document inpatient diagnoses</li> <li>Understands different practice models</li> </ul>                                                                                                      | <ul style="list-style-type: none"> <li>Understands principles of diagnosis, evaluation and management, and procedure coding</li> <li>Compares and contrasts different practice models</li> </ul>                                                                                                                                                                                                                                                                                                                                                                                                                                                                                                                                                                                                                                                                                                                                                                                                                                                                                                                                                                                                                                                                                                                                                                                                                                                                                                                                                                                                                                                                                                                                                                                                                 | <ul style="list-style-type: none"> <li>Codes routine diagnoses, encounters, and surgical procedures; documents medical necessity</li> <li>Recognizes basic elements needed to establish practice (e.g., negotiations, malpractice insurance, contracts, staffing, compliance, facility accreditation)</li> <li>Establishes timeline and identifies resources for transition to practice (e.g. information technology, legal, financial, personnel)</li> </ul> | <ul style="list-style-type: none"> <li>Participates in advocacy activities for health policy</li> <li>Creates curriculum to teach practice management</li> <li>Codes complex and unusual diagnoses, encounters and surgical procedures</li> </ul>                                                                                                                                                                                                                                                                                                                                                                                                                                                                                                                                                                                                                                                                                                                                                                                                                                                                                                                                                                                                                                                                                                                                                                                                                                                                                                                                                       |                                                                                                                                                                                                                                                                                         |                                                                                                                                                                                                                                            |                                                                                                                                                                                                                                                           |                                                                                                                                                                                                                                                                                         |           |                                                                                                                                                                                                                                                                                                                                                                                                                                                                                                                                                                                                                                                                                                                                                                                                                                                                                                                                                                                                                                                                                                                                                                                                                                                                                                                                                                                                                                                                                                        |                                                                       |         |                                                                                                                                                                                            |                                                                                                                                                                                                       |                                                                                                                                                                                                                                                                                                         |                                                                                                                                                                                                                                                                                                                                                                                                                                                               |                                                                                                                                                                                                                                                                                                                                |                                                                                                                                                                                                                                                                 |                                                                                                                                                                        |         |                                                                                                                                                    |                                                                                                                                                                                                              |                                                                                                                                                                                                                                                                                    |                                                                                                                                                                                                                   |                                                                                                                                                                         |

| <p><b>Transitional Year</b></p>                                                                                                                                                                      | <p>PS<br/>QI</p>                                                                                                                                                                                                                                                                                                                                                                                                                                                                                                                | <p><b>Systems-Based Practice 1: Patient Safety and Quality Improvement</b></p> <table border="1"> <thead> <tr> <th>Level 1</th> <th>Level 2</th> <th>Level 3</th> <th>Level 4</th> <th>Level 5</th> </tr> </thead> <tbody> <tr> <td>Demonstrates knowledge of common patient safety events</td> <td>Identifies system factors that lead to patient safety events</td> <td>Participates in analysis of patient safety events (simulated or actual)</td> <td>Conducts analysis of patient safety events and offers error prevention strategies (simulated or actual)</td> <td>Actively engages teams and processes to modify systems to prevent patient safety events</td> </tr> <tr> <td>Demonstrates knowledge of how to report patient safety events</td> <td>Reports patient safety events through institutional reporting systems (simulated or actual)</td> <td>Participates in disclosure of patient safety events to the team (simulated or actual)</td> <td>Participates in disclosure of patient safety events to patients and families (simulated or actual)</td> <td>Role models or mentors others in the disclosure of patient safety events</td> </tr> <tr> <td>Demonstrates knowledge of basic quality improvement methodologies and metrics</td> <td>Describes programmatic or institutional quality improvement initiatives (e.g., handwashing, reducing needle stick injuries)</td> <td>Participates in programmatic or institutional quality improvement initiatives</td> <td>Demonstrates the skills required to identify, develop, implement, and analyze a quality improvement project</td> <td>Creates, implements, and assesses quality improvement initiatives at the institutional or community systems level</td> </tr> </tbody> </table>                                                                                                                                                                                                                                                                                                                                                                                                                                                                                                                                                                                                                                                                                                                                                                                                                                                                                                                                                                                                                                                                                                                                                                                                                                                                                                                                                                                                                                                                                                                                                                                                                                                                                                                         | Level 1                                                                                                                                                                                                                                                                                                                                                                                                                                                                                                                                                                                                                                                                                            | Level 2                                                                                                                                                                                                                                                                                                                                                                                                                                                                                                                                                                                                                                                                                                                                                                                                                                                       | Level 3                                                                                                                                                                                                                                                                                                                                                                                                                                                                                    | Level 4 | Level 5 | Demonstrates knowledge of common patient safety events  | Identifies system factors that lead to patient safety events                                                             | Participates in analysis of patient safety events (simulated or actual)                                                                                                                                                                                                                                                                                                                                                                                                                                                         | Conducts analysis of patient safety events and offers error prevention strategies (simulated or actual)                                                                                                                                                                                                                                                                                                                                                                                                                           | Actively engages teams and processes to modify systems to prevent patient safety events                                                                                                                                                                                                                                                                                                                                                                                                                                                                                                                                                                                                            | Demonstrates knowledge of how to report patient safety events                                                                                                                                                                                                                                                                                                                                                                                                                                                                                                                                                                                                                                                                                                                                                                                                 | Reports patient safety events through institutional reporting systems (simulated or actual)                                                                                                                                                                                                                                                                                                                                                                                                | Participates in disclosure of patient safety events to the team (simulated or actual)      | Participates in disclosure of patient safety events to patients and families (simulated or actual)                                                                                                                                                                                                                                                                                                                                                                                                                                                                                                                                                                                                                                                                                                                                                                                                                                                                                                                                                                                                                                                                                                                                                   | Role models or mentors others in the disclosure of patient safety events                                                      | Demonstrates knowledge of basic quality improvement methodologies and metrics         | Describes programmatic or institutional quality improvement initiatives (e.g., handwashing, reducing needle stick injuries) | Participates in programmatic or institutional quality improvement initiatives            | Demonstrates the skills required to identify, develop, implement, and analyze a quality improvement project | Creates, implements, and assesses quality improvement initiatives at the institutional or community systems level |                                              |                                                                         |                                                                          |                                                                                 |                                                                               |                                                                                                                                                       |                                                       |                                                                                                             |                                                                                                           |
|------------------------------------------------------------------------------------------------------------------------------------------------------------------------------------------------------|---------------------------------------------------------------------------------------------------------------------------------------------------------------------------------------------------------------------------------------------------------------------------------------------------------------------------------------------------------------------------------------------------------------------------------------------------------------------------------------------------------------------------------|--------------------------------------------------------------------------------------------------------------------------------------------------------------------------------------------------------------------------------------------------------------------------------------------------------------------------------------------------------------------------------------------------------------------------------------------------------------------------------------------------------------------------------------------------------------------------------------------------------------------------------------------------------------------------------------------------------------------------------------------------------------------------------------------------------------------------------------------------------------------------------------------------------------------------------------------------------------------------------------------------------------------------------------------------------------------------------------------------------------------------------------------------------------------------------------------------------------------------------------------------------------------------------------------------------------------------------------------------------------------------------------------------------------------------------------------------------------------------------------------------------------------------------------------------------------------------------------------------------------------------------------------------------------------------------------------------------------------------------------------------------------------------------------------------------------------------------------------------------------------------------------------------------------------------------------------------------------------------------------------------------------------------------------------------------------------------------------------------------------------------------------------------------------------------------------------------------------------------------------------------------------------------------------------------------------------------------------------------------------------------------------------------------------------------------------------------------------------------------------------------------------------------------------------------------------------------------------------------------------------------------------------------------------------------------------------------------------------------------------------------------------------------------------------------------------------------------------------------------------------------------------------------------------------------------------------------------------------------------------------------------------------------------------------------------------------------------------------------------------------------------------------------------------------------------------------------------------------------------------------------------------------------------------------------------------------------------------------------------------------------------------------------------------------------------------------------------------------------------------------|----------------------------------------------------------------------------------------------------------------------------------------------------------------------------------------------------------------------------------------------------------------------------------------------------------------------------------------------------------------------------------------------------------------------------------------------------------------------------------------------------------------------------------------------------------------------------------------------------------------------------------------------------------------------------------------------------|---------------------------------------------------------------------------------------------------------------------------------------------------------------------------------------------------------------------------------------------------------------------------------------------------------------------------------------------------------------------------------------------------------------------------------------------------------------------------------------------------------------------------------------------------------------------------------------------------------------------------------------------------------------------------------------------------------------------------------------------------------------------------------------------------------------------------------------------------------------|--------------------------------------------------------------------------------------------------------------------------------------------------------------------------------------------------------------------------------------------------------------------------------------------------------------------------------------------------------------------------------------------------------------------------------------------------------------------------------------------|---------|---------|---------------------------------------------------------|--------------------------------------------------------------------------------------------------------------------------|---------------------------------------------------------------------------------------------------------------------------------------------------------------------------------------------------------------------------------------------------------------------------------------------------------------------------------------------------------------------------------------------------------------------------------------------------------------------------------------------------------------------------------|-----------------------------------------------------------------------------------------------------------------------------------------------------------------------------------------------------------------------------------------------------------------------------------------------------------------------------------------------------------------------------------------------------------------------------------------------------------------------------------------------------------------------------------|----------------------------------------------------------------------------------------------------------------------------------------------------------------------------------------------------------------------------------------------------------------------------------------------------------------------------------------------------------------------------------------------------------------------------------------------------------------------------------------------------------------------------------------------------------------------------------------------------------------------------------------------------------------------------------------------------|---------------------------------------------------------------------------------------------------------------------------------------------------------------------------------------------------------------------------------------------------------------------------------------------------------------------------------------------------------------------------------------------------------------------------------------------------------------------------------------------------------------------------------------------------------------------------------------------------------------------------------------------------------------------------------------------------------------------------------------------------------------------------------------------------------------------------------------------------------------|--------------------------------------------------------------------------------------------------------------------------------------------------------------------------------------------------------------------------------------------------------------------------------------------------------------------------------------------------------------------------------------------------------------------------------------------------------------------------------------------|--------------------------------------------------------------------------------------------|------------------------------------------------------------------------------------------------------------------------------------------------------------------------------------------------------------------------------------------------------------------------------------------------------------------------------------------------------------------------------------------------------------------------------------------------------------------------------------------------------------------------------------------------------------------------------------------------------------------------------------------------------------------------------------------------------------------------------------------------------------------------------------------------------------------------------------------------------------------------------------------------------------------------------------------------------------------------------------------------------------------------------------------------------------------------------------------------------------------------------------------------------------------------------------------------------------------------------------------------------|-------------------------------------------------------------------------------------------------------------------------------|---------------------------------------------------------------------------------------|-----------------------------------------------------------------------------------------------------------------------------|------------------------------------------------------------------------------------------|-------------------------------------------------------------------------------------------------------------|-------------------------------------------------------------------------------------------------------------------|----------------------------------------------|-------------------------------------------------------------------------|--------------------------------------------------------------------------|---------------------------------------------------------------------------------|-------------------------------------------------------------------------------|-------------------------------------------------------------------------------------------------------------------------------------------------------|-------------------------------------------------------|-------------------------------------------------------------------------------------------------------------|-----------------------------------------------------------------------------------------------------------|
| Level 1                                                                                                                                                                                              | Level 2                                                                                                                                                                                                                                                                                                                                                                                                                                                                                                                         | Level 3                                                                                                                                                                                                                                                                                                                                                                                                                                                                                                                                                                                                                                                                                                                                                                                                                                                                                                                                                                                                                                                                                                                                                                                                                                                                                                                                                                                                                                                                                                                                                                                                                                                                                                                                                                                                                                                                                                                                                                                                                                                                                                                                                                                                                                                                                                                                                                                                                                                                                                                                                                                                                                                                                                                                                                                                                                                                                                                                                                                                                                                                                                                                                                                                                                                                                                                                                                                                                                                                                    | Level 4                                                                                                                                                                                                                                                                                                                                                                                                                                                                                                                                                                                                                                                                                            | Level 5                                                                                                                                                                                                                                                                                                                                                                                                                                                                                                                                                                                                                                                                                                                                                                                                                                                       |                                                                                                                                                                                                                                                                                                                                                                                                                                                                                            |         |         |                                                         |                                                                                                                          |                                                                                                                                                                                                                                                                                                                                                                                                                                                                                                                                 |                                                                                                                                                                                                                                                                                                                                                                                                                                                                                                                                   |                                                                                                                                                                                                                                                                                                                                                                                                                                                                                                                                                                                                                                                                                                    |                                                                                                                                                                                                                                                                                                                                                                                                                                                                                                                                                                                                                                                                                                                                                                                                                                                               |                                                                                                                                                                                                                                                                                                                                                                                                                                                                                            |                                                                                            |                                                                                                                                                                                                                                                                                                                                                                                                                                                                                                                                                                                                                                                                                                                                                                                                                                                                                                                                                                                                                                                                                                                                                                                                                                                      |                                                                                                                               |                                                                                       |                                                                                                                             |                                                                                          |                                                                                                             |                                                                                                                   |                                              |                                                                         |                                                                          |                                                                                 |                                                                               |                                                                                                                                                       |                                                       |                                                                                                             |                                                                                                           |
| Demonstrates knowledge of common patient safety events                                                                                                                                               | Identifies system factors that lead to patient safety events                                                                                                                                                                                                                                                                                                                                                                                                                                                                    | Participates in analysis of patient safety events (simulated or actual)                                                                                                                                                                                                                                                                                                                                                                                                                                                                                                                                                                                                                                                                                                                                                                                                                                                                                                                                                                                                                                                                                                                                                                                                                                                                                                                                                                                                                                                                                                                                                                                                                                                                                                                                                                                                                                                                                                                                                                                                                                                                                                                                                                                                                                                                                                                                                                                                                                                                                                                                                                                                                                                                                                                                                                                                                                                                                                                                                                                                                                                                                                                                                                                                                                                                                                                                                                                                                    | Conducts analysis of patient safety events and offers error prevention strategies (simulated or actual)                                                                                                                                                                                                                                                                                                                                                                                                                                                                                                                                                                                            | Actively engages teams and processes to modify systems to prevent patient safety events                                                                                                                                                                                                                                                                                                                                                                                                                                                                                                                                                                                                                                                                                                                                                                       |                                                                                                                                                                                                                                                                                                                                                                                                                                                                                            |         |         |                                                         |                                                                                                                          |                                                                                                                                                                                                                                                                                                                                                                                                                                                                                                                                 |                                                                                                                                                                                                                                                                                                                                                                                                                                                                                                                                   |                                                                                                                                                                                                                                                                                                                                                                                                                                                                                                                                                                                                                                                                                                    |                                                                                                                                                                                                                                                                                                                                                                                                                                                                                                                                                                                                                                                                                                                                                                                                                                                               |                                                                                                                                                                                                                                                                                                                                                                                                                                                                                            |                                                                                            |                                                                                                                                                                                                                                                                                                                                                                                                                                                                                                                                                                                                                                                                                                                                                                                                                                                                                                                                                                                                                                                                                                                                                                                                                                                      |                                                                                                                               |                                                                                       |                                                                                                                             |                                                                                          |                                                                                                             |                                                                                                                   |                                              |                                                                         |                                                                          |                                                                                 |                                                                               |                                                                                                                                                       |                                                       |                                                                                                             |                                                                                                           |
| Demonstrates knowledge of how to report patient safety events                                                                                                                                        | Reports patient safety events through institutional reporting systems (simulated or actual)                                                                                                                                                                                                                                                                                                                                                                                                                                     | Participates in disclosure of patient safety events to the team (simulated or actual)                                                                                                                                                                                                                                                                                                                                                                                                                                                                                                                                                                                                                                                                                                                                                                                                                                                                                                                                                                                                                                                                                                                                                                                                                                                                                                                                                                                                                                                                                                                                                                                                                                                                                                                                                                                                                                                                                                                                                                                                                                                                                                                                                                                                                                                                                                                                                                                                                                                                                                                                                                                                                                                                                                                                                                                                                                                                                                                                                                                                                                                                                                                                                                                                                                                                                                                                                                                                      | Participates in disclosure of patient safety events to patients and families (simulated or actual)                                                                                                                                                                                                                                                                                                                                                                                                                                                                                                                                                                                                 | Role models or mentors others in the disclosure of patient safety events                                                                                                                                                                                                                                                                                                                                                                                                                                                                                                                                                                                                                                                                                                                                                                                      |                                                                                                                                                                                                                                                                                                                                                                                                                                                                                            |         |         |                                                         |                                                                                                                          |                                                                                                                                                                                                                                                                                                                                                                                                                                                                                                                                 |                                                                                                                                                                                                                                                                                                                                                                                                                                                                                                                                   |                                                                                                                                                                                                                                                                                                                                                                                                                                                                                                                                                                                                                                                                                                    |                                                                                                                                                                                                                                                                                                                                                                                                                                                                                                                                                                                                                                                                                                                                                                                                                                                               |                                                                                                                                                                                                                                                                                                                                                                                                                                                                                            |                                                                                            |                                                                                                                                                                                                                                                                                                                                                                                                                                                                                                                                                                                                                                                                                                                                                                                                                                                                                                                                                                                                                                                                                                                                                                                                                                                      |                                                                                                                               |                                                                                       |                                                                                                                             |                                                                                          |                                                                                                             |                                                                                                                   |                                              |                                                                         |                                                                          |                                                                                 |                                                                               |                                                                                                                                                       |                                                       |                                                                                                             |                                                                                                           |
| Demonstrates knowledge of basic quality improvement methodologies and metrics                                                                                                                        | Describes programmatic or institutional quality improvement initiatives (e.g., handwashing, reducing needle stick injuries)                                                                                                                                                                                                                                                                                                                                                                                                     | Participates in programmatic or institutional quality improvement initiatives                                                                                                                                                                                                                                                                                                                                                                                                                                                                                                                                                                                                                                                                                                                                                                                                                                                                                                                                                                                                                                                                                                                                                                                                                                                                                                                                                                                                                                                                                                                                                                                                                                                                                                                                                                                                                                                                                                                                                                                                                                                                                                                                                                                                                                                                                                                                                                                                                                                                                                                                                                                                                                                                                                                                                                                                                                                                                                                                                                                                                                                                                                                                                                                                                                                                                                                                                                                                              | Demonstrates the skills required to identify, develop, implement, and analyze a quality improvement project                                                                                                                                                                                                                                                                                                                                                                                                                                                                                                                                                                                        | Creates, implements, and assesses quality improvement initiatives at the institutional or community systems level                                                                                                                                                                                                                                                                                                                                                                                                                                                                                                                                                                                                                                                                                                                                             |                                                                                                                                                                                                                                                                                                                                                                                                                                                                                            |         |         |                                                         |                                                                                                                          |                                                                                                                                                                                                                                                                                                                                                                                                                                                                                                                                 |                                                                                                                                                                                                                                                                                                                                                                                                                                                                                                                                   |                                                                                                                                                                                                                                                                                                                                                                                                                                                                                                                                                                                                                                                                                                    |                                                                                                                                                                                                                                                                                                                                                                                                                                                                                                                                                                                                                                                                                                                                                                                                                                                               |                                                                                                                                                                                                                                                                                                                                                                                                                                                                                            |                                                                                            |                                                                                                                                                                                                                                                                                                                                                                                                                                                                                                                                                                                                                                                                                                                                                                                                                                                                                                                                                                                                                                                                                                                                                                                                                                                      |                                                                                                                               |                                                                                       |                                                                                                                             |                                                                                          |                                                                                                             |                                                                                                                   |                                              |                                                                         |                                                                          |                                                                                 |                                                                               |                                                                                                                                                       |                                                       |                                                                                                             |                                                                                                           |
| <p><b>Transitional Year</b></p>                                                                                                                                                                      | <p>CC</p>                                                                                                                                                                                                                                                                                                                                                                                                                                                                                                                       | <p><b>Systems-Based Practice 2: System Navigation for Patient-Centered Care</b></p> <table border="1"> <thead> <tr> <th>Level 1</th> <th>Level 2</th> <th>Level 3</th> <th>Level 4</th> <th>Level 5</th> </tr> </thead> <tbody> <tr> <td>Demonstrates knowledge of care coordination</td> <td>Coordinates care of patients in routine clinical situations effectively using the resources of interprofessional teams</td> <td>Coordinates care of patients in complex clinical situations effectively using the resources of interprofessional teams</td> <td>Efficiently coordinates patient-centered care using interprofessional teams</td> <td>Leads and role models effective coordination of patient-centered care among different disciplines and specialties</td> </tr> <tr> <td>Identifies key elements for safe and effective transitions of care and hand-offs</td> <td>Performs safe and effective transitions of care/hand-offs in routine clinical situations</td> <td>Reassesses patient and anticipates patient specific factors that may lead to readmission</td> <td>Performs safe and effective transitions of care/hand-offs in complex clinical situations and across health care delivery systems</td> <td>Role models and advocates for safe and effective transitions of care/hand-offs within and across health care delivery systems</td> </tr> <tr> <td>Demonstrates knowledge of local population and community health needs and disparities</td> <td>Identifies resources to meet the health needs and disparities of local populations</td> <td>Uses local resources effectively to meet the needs of a patient population and community</td> <td>Participates in changing and adapting practice to provide for the needs of specific populations</td> <td>Leads innovations and advocates across populations and communities towards health/health care equity</td> </tr> </tbody> </table>                                                                                                                                                                                                                                                                                                                                                                                                                                                                                                                                                                                                                                                                                                                                                                                                                                                                                                                                                                                                                                                                                                                                                                                                                                                                                                                                                                                                                                                                                                                                                                 | Level 1                                                                                                                                                                                                                                                                                                                                                                                                                                                                                                                                                                                                                                                                                            | Level 2                                                                                                                                                                                                                                                                                                                                                                                                                                                                                                                                                                                                                                                                                                                                                                                                                                                       | Level 3                                                                                                                                                                                                                                                                                                                                                                                                                                                                                    | Level 4 | Level 5 | Demonstrates knowledge of care coordination             | Coordinates care of patients in routine clinical situations effectively using the resources of interprofessional teams   | Coordinates care of patients in complex clinical situations effectively using the resources of interprofessional teams                                                                                                                                                                                                                                                                                                                                                                                                          | Efficiently coordinates patient-centered care using interprofessional teams                                                                                                                                                                                                                                                                                                                                                                                                                                                       | Leads and role models effective coordination of patient-centered care among different disciplines and specialties                                                                                                                                                                                                                                                                                                                                                                                                                                                                                                                                                                                  | Identifies key elements for safe and effective transitions of care and hand-offs                                                                                                                                                                                                                                                                                                                                                                                                                                                                                                                                                                                                                                                                                                                                                                              | Performs safe and effective transitions of care/hand-offs in routine clinical situations                                                                                                                                                                                                                                                                                                                                                                                                   | Reassesses patient and anticipates patient specific factors that may lead to readmission   | Performs safe and effective transitions of care/hand-offs in complex clinical situations and across health care delivery systems                                                                                                                                                                                                                                                                                                                                                                                                                                                                                                                                                                                                                                                                                                                                                                                                                                                                                                                                                                                                                                                                                                                     | Role models and advocates for safe and effective transitions of care/hand-offs within and across health care delivery systems | Demonstrates knowledge of local population and community health needs and disparities | Identifies resources to meet the health needs and disparities of local populations                                          | Uses local resources effectively to meet the needs of a patient population and community | Participates in changing and adapting practice to provide for the needs of specific populations             | Leads innovations and advocates across populations and communities towards health/health care equity              |                                              |                                                                         |                                                                          |                                                                                 |                                                                               |                                                                                                                                                       |                                                       |                                                                                                             |                                                                                                           |
| Level 1                                                                                                                                                                                              | Level 2                                                                                                                                                                                                                                                                                                                                                                                                                                                                                                                         | Level 3                                                                                                                                                                                                                                                                                                                                                                                                                                                                                                                                                                                                                                                                                                                                                                                                                                                                                                                                                                                                                                                                                                                                                                                                                                                                                                                                                                                                                                                                                                                                                                                                                                                                                                                                                                                                                                                                                                                                                                                                                                                                                                                                                                                                                                                                                                                                                                                                                                                                                                                                                                                                                                                                                                                                                                                                                                                                                                                                                                                                                                                                                                                                                                                                                                                                                                                                                                                                                                                                                    | Level 4                                                                                                                                                                                                                                                                                                                                                                                                                                                                                                                                                                                                                                                                                            | Level 5                                                                                                                                                                                                                                                                                                                                                                                                                                                                                                                                                                                                                                                                                                                                                                                                                                                       |                                                                                                                                                                                                                                                                                                                                                                                                                                                                                            |         |         |                                                         |                                                                                                                          |                                                                                                                                                                                                                                                                                                                                                                                                                                                                                                                                 |                                                                                                                                                                                                                                                                                                                                                                                                                                                                                                                                   |                                                                                                                                                                                                                                                                                                                                                                                                                                                                                                                                                                                                                                                                                                    |                                                                                                                                                                                                                                                                                                                                                                                                                                                                                                                                                                                                                                                                                                                                                                                                                                                               |                                                                                                                                                                                                                                                                                                                                                                                                                                                                                            |                                                                                            |                                                                                                                                                                                                                                                                                                                                                                                                                                                                                                                                                                                                                                                                                                                                                                                                                                                                                                                                                                                                                                                                                                                                                                                                                                                      |                                                                                                                               |                                                                                       |                                                                                                                             |                                                                                          |                                                                                                             |                                                                                                                   |                                              |                                                                         |                                                                          |                                                                                 |                                                                               |                                                                                                                                                       |                                                       |                                                                                                             |                                                                                                           |
| Demonstrates knowledge of care coordination                                                                                                                                                          | Coordinates care of patients in routine clinical situations effectively using the resources of interprofessional teams                                                                                                                                                                                                                                                                                                                                                                                                          | Coordinates care of patients in complex clinical situations effectively using the resources of interprofessional teams                                                                                                                                                                                                                                                                                                                                                                                                                                                                                                                                                                                                                                                                                                                                                                                                                                                                                                                                                                                                                                                                                                                                                                                                                                                                                                                                                                                                                                                                                                                                                                                                                                                                                                                                                                                                                                                                                                                                                                                                                                                                                                                                                                                                                                                                                                                                                                                                                                                                                                                                                                                                                                                                                                                                                                                                                                                                                                                                                                                                                                                                                                                                                                                                                                                                                                                                                                     | Efficiently coordinates patient-centered care using interprofessional teams                                                                                                                                                                                                                                                                                                                                                                                                                                                                                                                                                                                                                        | Leads and role models effective coordination of patient-centered care among different disciplines and specialties                                                                                                                                                                                                                                                                                                                                                                                                                                                                                                                                                                                                                                                                                                                                             |                                                                                                                                                                                                                                                                                                                                                                                                                                                                                            |         |         |                                                         |                                                                                                                          |                                                                                                                                                                                                                                                                                                                                                                                                                                                                                                                                 |                                                                                                                                                                                                                                                                                                                                                                                                                                                                                                                                   |                                                                                                                                                                                                                                                                                                                                                                                                                                                                                                                                                                                                                                                                                                    |                                                                                                                                                                                                                                                                                                                                                                                                                                                                                                                                                                                                                                                                                                                                                                                                                                                               |                                                                                                                                                                                                                                                                                                                                                                                                                                                                                            |                                                                                            |                                                                                                                                                                                                                                                                                                                                                                                                                                                                                                                                                                                                                                                                                                                                                                                                                                                                                                                                                                                                                                                                                                                                                                                                                                                      |                                                                                                                               |                                                                                       |                                                                                                                             |                                                                                          |                                                                                                             |                                                                                                                   |                                              |                                                                         |                                                                          |                                                                                 |                                                                               |                                                                                                                                                       |                                                       |                                                                                                             |                                                                                                           |
| Identifies key elements for safe and effective transitions of care and hand-offs                                                                                                                     | Performs safe and effective transitions of care/hand-offs in routine clinical situations                                                                                                                                                                                                                                                                                                                                                                                                                                        | Reassesses patient and anticipates patient specific factors that may lead to readmission                                                                                                                                                                                                                                                                                                                                                                                                                                                                                                                                                                                                                                                                                                                                                                                                                                                                                                                                                                                                                                                                                                                                                                                                                                                                                                                                                                                                                                                                                                                                                                                                                                                                                                                                                                                                                                                                                                                                                                                                                                                                                                                                                                                                                                                                                                                                                                                                                                                                                                                                                                                                                                                                                                                                                                                                                                                                                                                                                                                                                                                                                                                                                                                                                                                                                                                                                                                                   | Performs safe and effective transitions of care/hand-offs in complex clinical situations and across health care delivery systems                                                                                                                                                                                                                                                                                                                                                                                                                                                                                                                                                                   | Role models and advocates for safe and effective transitions of care/hand-offs within and across health care delivery systems                                                                                                                                                                                                                                                                                                                                                                                                                                                                                                                                                                                                                                                                                                                                 |                                                                                                                                                                                                                                                                                                                                                                                                                                                                                            |         |         |                                                         |                                                                                                                          |                                                                                                                                                                                                                                                                                                                                                                                                                                                                                                                                 |                                                                                                                                                                                                                                                                                                                                                                                                                                                                                                                                   |                                                                                                                                                                                                                                                                                                                                                                                                                                                                                                                                                                                                                                                                                                    |                                                                                                                                                                                                                                                                                                                                                                                                                                                                                                                                                                                                                                                                                                                                                                                                                                                               |                                                                                                                                                                                                                                                                                                                                                                                                                                                                                            |                                                                                            |                                                                                                                                                                                                                                                                                                                                                                                                                                                                                                                                                                                                                                                                                                                                                                                                                                                                                                                                                                                                                                                                                                                                                                                                                                                      |                                                                                                                               |                                                                                       |                                                                                                                             |                                                                                          |                                                                                                             |                                                                                                                   |                                              |                                                                         |                                                                          |                                                                                 |                                                                               |                                                                                                                                                       |                                                       |                                                                                                             |                                                                                                           |
| Demonstrates knowledge of local population and community health needs and disparities                                                                                                                | Identifies resources to meet the health needs and disparities of local populations                                                                                                                                                                                                                                                                                                                                                                                                                                              | Uses local resources effectively to meet the needs of a patient population and community                                                                                                                                                                                                                                                                                                                                                                                                                                                                                                                                                                                                                                                                                                                                                                                                                                                                                                                                                                                                                                                                                                                                                                                                                                                                                                                                                                                                                                                                                                                                                                                                                                                                                                                                                                                                                                                                                                                                                                                                                                                                                                                                                                                                                                                                                                                                                                                                                                                                                                                                                                                                                                                                                                                                                                                                                                                                                                                                                                                                                                                                                                                                                                                                                                                                                                                                                                                                   | Participates in changing and adapting practice to provide for the needs of specific populations                                                                                                                                                                                                                                                                                                                                                                                                                                                                                                                                                                                                    | Leads innovations and advocates across populations and communities towards health/health care equity                                                                                                                                                                                                                                                                                                                                                                                                                                                                                                                                                                                                                                                                                                                                                          |                                                                                                                                                                                                                                                                                                                                                                                                                                                                                            |         |         |                                                         |                                                                                                                          |                                                                                                                                                                                                                                                                                                                                                                                                                                                                                                                                 |                                                                                                                                                                                                                                                                                                                                                                                                                                                                                                                                   |                                                                                                                                                                                                                                                                                                                                                                                                                                                                                                                                                                                                                                                                                                    |                                                                                                                                                                                                                                                                                                                                                                                                                                                                                                                                                                                                                                                                                                                                                                                                                                                               |                                                                                                                                                                                                                                                                                                                                                                                                                                                                                            |                                                                                            |                                                                                                                                                                                                                                                                                                                                                                                                                                                                                                                                                                                                                                                                                                                                                                                                                                                                                                                                                                                                                                                                                                                                                                                                                                                      |                                                                                                                               |                                                                                       |                                                                                                                             |                                                                                          |                                                                                                             |                                                                                                                   |                                              |                                                                         |                                                                          |                                                                                 |                                                                               |                                                                                                                                                       |                                                       |                                                                                                             |                                                                                                           |
| <p><b>Transitional Year</b></p>                                                                                                                                                                      | <p>HC Systems</p>                                                                                                                                                                                                                                                                                                                                                                                                                                                                                                               | <p><b>Systems-Based Practice 3: Physician Role in Health Care Systems</b></p> <table border="1"> <thead> <tr> <th>Level 1</th> <th>Level 2</th> <th>Level 3</th> <th>Level 4</th> <th>Level 5</th> </tr> </thead> <tbody> <tr> <td>Identifies components of the complex health care system</td> <td>Describes the physician's role and how the interrelated components of the complex health care system impact patient care</td> <td>Analyzes how personal practice affects the system (e.g., length of stay, readmission rates, clinical efficiency)</td> <td>Adapts personal practice based on practice habits data</td> <td>Manages the interrelated components of complex health care systems for efficient and effective patient care</td> </tr> <tr> <td>Describes basic health payment systems (e.g., private, public, government, and uninsured care) and different practice models (e.g., fee for service, capitated fees, accountable care organizations)</td> <td>Describes the limitations of payment models and uses available patient care resources</td> <td>Uses shared decision making in delivering care informed by patient-specific payment models</td> <td>Advocates for patient care incorporating the limitations of their payment model (e.g., community resources, patient assistance resources)</td> <td>Advocates for health policy to better align payment systems with high-value care</td> </tr> </tbody> </table>                                                                                                                                                                                                                                                                                                                                                                                                                                                                                                                                                                                                                                                                                                                                                                                                                                                                                                                                                                                                                                                                                                                                                                                                                                                                                                                                                                                                                                                                                                                                                                                                                                                                                                                                                                                                                                                                                                                                                                                                                                          | Level 1                                                                                                                                                                                                                                                                                                                                                                                                                                                                                                                                                                                                                                                                                            | Level 2                                                                                                                                                                                                                                                                                                                                                                                                                                                                                                                                                                                                                                                                                                                                                                                                                                                       | Level 3                                                                                                                                                                                                                                                                                                                                                                                                                                                                                    | Level 4 | Level 5 | Identifies components of the complex health care system | Describes the physician's role and how the interrelated components of the complex health care system impact patient care | Analyzes how personal practice affects the system (e.g., length of stay, readmission rates, clinical efficiency)                                                                                                                                                                                                                                                                                                                                                                                                                | Adapts personal practice based on practice habits data                                                                                                                                                                                                                                                                                                                                                                                                                                                                            | Manages the interrelated components of complex health care systems for efficient and effective patient care                                                                                                                                                                                                                                                                                                                                                                                                                                                                                                                                                                                        | Describes basic health payment systems (e.g., private, public, government, and uninsured care) and different practice models (e.g., fee for service, capitated fees, accountable care organizations)                                                                                                                                                                                                                                                                                                                                                                                                                                                                                                                                                                                                                                                          | Describes the limitations of payment models and uses available patient care resources                                                                                                                                                                                                                                                                                                                                                                                                      | Uses shared decision making in delivering care informed by patient-specific payment models | Advocates for patient care incorporating the limitations of their payment model (e.g., community resources, patient assistance resources)                                                                                                                                                                                                                                                                                                                                                                                                                                                                                                                                                                                                                                                                                                                                                                                                                                                                                                                                                                                                                                                                                                            | Advocates for health policy to better align payment systems with high-value care                                              |                                                                                       |                                                                                                                             |                                                                                          |                                                                                                             |                                                                                                                   |                                              |                                                                         |                                                                          |                                                                                 |                                                                               |                                                                                                                                                       |                                                       |                                                                                                             |                                                                                                           |
| Level 1                                                                                                                                                                                              | Level 2                                                                                                                                                                                                                                                                                                                                                                                                                                                                                                                         | Level 3                                                                                                                                                                                                                                                                                                                                                                                                                                                                                                                                                                                                                                                                                                                                                                                                                                                                                                                                                                                                                                                                                                                                                                                                                                                                                                                                                                                                                                                                                                                                                                                                                                                                                                                                                                                                                                                                                                                                                                                                                                                                                                                                                                                                                                                                                                                                                                                                                                                                                                                                                                                                                                                                                                                                                                                                                                                                                                                                                                                                                                                                                                                                                                                                                                                                                                                                                                                                                                                                                    | Level 4                                                                                                                                                                                                                                                                                                                                                                                                                                                                                                                                                                                                                                                                                            | Level 5                                                                                                                                                                                                                                                                                                                                                                                                                                                                                                                                                                                                                                                                                                                                                                                                                                                       |                                                                                                                                                                                                                                                                                                                                                                                                                                                                                            |         |         |                                                         |                                                                                                                          |                                                                                                                                                                                                                                                                                                                                                                                                                                                                                                                                 |                                                                                                                                                                                                                                                                                                                                                                                                                                                                                                                                   |                                                                                                                                                                                                                                                                                                                                                                                                                                                                                                                                                                                                                                                                                                    |                                                                                                                                                                                                                                                                                                                                                                                                                                                                                                                                                                                                                                                                                                                                                                                                                                                               |                                                                                                                                                                                                                                                                                                                                                                                                                                                                                            |                                                                                            |                                                                                                                                                                                                                                                                                                                                                                                                                                                                                                                                                                                                                                                                                                                                                                                                                                                                                                                                                                                                                                                                                                                                                                                                                                                      |                                                                                                                               |                                                                                       |                                                                                                                             |                                                                                          |                                                                                                             |                                                                                                                   |                                              |                                                                         |                                                                          |                                                                                 |                                                                               |                                                                                                                                                       |                                                       |                                                                                                             |                                                                                                           |
| Identifies components of the complex health care system                                                                                                                                              | Describes the physician's role and how the interrelated components of the complex health care system impact patient care                                                                                                                                                                                                                                                                                                                                                                                                        | Analyzes how personal practice affects the system (e.g., length of stay, readmission rates, clinical efficiency)                                                                                                                                                                                                                                                                                                                                                                                                                                                                                                                                                                                                                                                                                                                                                                                                                                                                                                                                                                                                                                                                                                                                                                                                                                                                                                                                                                                                                                                                                                                                                                                                                                                                                                                                                                                                                                                                                                                                                                                                                                                                                                                                                                                                                                                                                                                                                                                                                                                                                                                                                                                                                                                                                                                                                                                                                                                                                                                                                                                                                                                                                                                                                                                                                                                                                                                                                                           | Adapts personal practice based on practice habits data                                                                                                                                                                                                                                                                                                                                                                                                                                                                                                                                                                                                                                             | Manages the interrelated components of complex health care systems for efficient and effective patient care                                                                                                                                                                                                                                                                                                                                                                                                                                                                                                                                                                                                                                                                                                                                                   |                                                                                                                                                                                                                                                                                                                                                                                                                                                                                            |         |         |                                                         |                                                                                                                          |                                                                                                                                                                                                                                                                                                                                                                                                                                                                                                                                 |                                                                                                                                                                                                                                                                                                                                                                                                                                                                                                                                   |                                                                                                                                                                                                                                                                                                                                                                                                                                                                                                                                                                                                                                                                                                    |                                                                                                                                                                                                                                                                                                                                                                                                                                                                                                                                                                                                                                                                                                                                                                                                                                                               |                                                                                                                                                                                                                                                                                                                                                                                                                                                                                            |                                                                                            |                                                                                                                                                                                                                                                                                                                                                                                                                                                                                                                                                                                                                                                                                                                                                                                                                                                                                                                                                                                                                                                                                                                                                                                                                                                      |                                                                                                                               |                                                                                       |                                                                                                                             |                                                                                          |                                                                                                             |                                                                                                                   |                                              |                                                                         |                                                                          |                                                                                 |                                                                               |                                                                                                                                                       |                                                       |                                                                                                             |                                                                                                           |
| Describes basic health payment systems (e.g., private, public, government, and uninsured care) and different practice models (e.g., fee for service, capitated fees, accountable care organizations) | Describes the limitations of payment models and uses available patient care resources                                                                                                                                                                                                                                                                                                                                                                                                                                           | Uses shared decision making in delivering care informed by patient-specific payment models                                                                                                                                                                                                                                                                                                                                                                                                                                                                                                                                                                                                                                                                                                                                                                                                                                                                                                                                                                                                                                                                                                                                                                                                                                                                                                                                                                                                                                                                                                                                                                                                                                                                                                                                                                                                                                                                                                                                                                                                                                                                                                                                                                                                                                                                                                                                                                                                                                                                                                                                                                                                                                                                                                                                                                                                                                                                                                                                                                                                                                                                                                                                                                                                                                                                                                                                                                                                 | Advocates for patient care incorporating the limitations of their payment model (e.g., community resources, patient assistance resources)                                                                                                                                                                                                                                                                                                                                                                                                                                                                                                                                                          | Advocates for health policy to better align payment systems with high-value care                                                                                                                                                                                                                                                                                                                                                                                                                                                                                                                                                                                                                                                                                                                                                                              |                                                                                                                                                                                                                                                                                                                                                                                                                                                                                            |         |         |                                                         |                                                                                                                          |                                                                                                                                                                                                                                                                                                                                                                                                                                                                                                                                 |                                                                                                                                                                                                                                                                                                                                                                                                                                                                                                                                   |                                                                                                                                                                                                                                                                                                                                                                                                                                                                                                                                                                                                                                                                                                    |                                                                                                                                                                                                                                                                                                                                                                                                                                                                                                                                                                                                                                                                                                                                                                                                                                                               |                                                                                                                                                                                                                                                                                                                                                                                                                                                                                            |                                                                                            |                                                                                                                                                                                                                                                                                                                                                                                                                                                                                                                                                                                                                                                                                                                                                                                                                                                                                                                                                                                                                                                                                                                                                                                                                                                      |                                                                                                                               |                                                                                       |                                                                                                                             |                                                                                          |                                                                                                             |                                                                                                                   |                                              |                                                                         |                                                                          |                                                                                 |                                                                               |                                                                                                                                                       |                                                       |                                                                                                             |                                                                                                           |
| <p><b>Urology</b></p>                                                                                                                                                                                | <p>HC Systems</p>                                                                                                                                                                                                                                                                                                                                                                                                                                                                                                               | <p><b>SBP1. Works effectively within and across health delivery systems.</b></p> <table border="1"> <thead> <tr> <th>Has not achieved Level 1</th> <th>Level 1</th> <th>Level 2</th> <th>Level 3</th> <th>Level 4</th> <th>Level 5</th> </tr> </thead> <tbody> <tr> <td></td> <td> <p>Describes basic levels of systems of care</p> <p>Identifies the types of health care providers within a health care delivery system</p> <p>Knows and appreciates the roles of a variety of health care providers, including consultants, therapists, nurses, home care workers, pharmacists, and social workers</p> <p>Advocates for quality patient care</p> <p><i>Example:</i><br/>The physician<br/>1. Identifies patient issues that are beyond his or her personal scope and abilities and may require consultation</p> </td> <td> <p>Knows unique roles of and services provided by local health care delivery systems and how to access these resources for patient care</p> <p>Knows and appreciates the roles of a variety of health care providers, including consultants, therapists, nurses, home care workers, pharmacists, and social workers</p> <p>Advocates for quality patient care</p> <p><i>Example:</i><br/>The physician<br/>1. Places consults for non-urologic issues affecting individual patients<br/>2. Reconciles medications at transfer</p> </td> <td> <p>Manages and coordinates care and care transitions across multiple delivery systems, including ambulatory, subspecialty, acute, rehabilitation, and skilled nursing</p> <p>Advocates for quality patient care and optimal patient care systems</p> <p><i>Example:</i><br/>The physician<br/>1. Involves the primary care physician and other consultants appropriately in the care of individual patients<br/>2. Facilitates performance of the interprofessional care team by (a) timely, clear communication/updating of patient condition and orders; and (b) skillful, respectful interaction (see ICS); complies with communication protocols<br/>3. Reconciles medications at transfer</p> </td> <td> <p>Discusses non-pharmacologic and non-procedural patient resources (such as physical therapy, social work, alternative medicine providers, chaplains, etc.) with patients and families</p> <p>Demonstrates how to lead a health care team by utilizing the skills and coordinating the activities of interprofessional team members (physician extenders/mid-levels, nurses, medical students, allied health workers, etc.)</p> <p>Negotiates patient-centered care among multiple care providers</p> <p><i>Example:</i><br/>The physician<br/>1. Coordinates the interprofessional care team by (a) anticipating the need for multi-disciplinary involvement; and (b) skillful, respectful interaction with all team members (see ICS); and complies with communication protocols<br/>2. Plans for appropriate post-hospitalization care of the patient</p> </td> <td> <p>Is adept at systems thinking</p> <p>Capably leads the health care team, using his or her personal role as leader</p> <p>Contributes meaningfully to interprofessional teams</p> <p><i>Example:</i><br/>The physician<br/>1. Capably leads interprofessional care teams by (a) anticipating the need for multi-disciplinary involvement; and (b) skillful, respectful interaction with all team members (see ICS)<br/>2. Aligns appropriate post-hospitalization care of the patient</p> </td> </tr> </tbody> </table> | Has not achieved Level 1                                                                                                                                                                                                                                                                                                                                                                                                                                                                                                                                                                                                                                                                           | Level 1                                                                                                                                                                                                                                                                                                                                                                                                                                                                                                                                                                                                                                                                                                                                                                                                                                                       | Level 2                                                                                                                                                                                                                                                                                                                                                                                                                                                                                    | Level 3 | Level 4 | Level 5                                                 |                                                                                                                          | <p>Describes basic levels of systems of care</p> <p>Identifies the types of health care providers within a health care delivery system</p> <p>Knows and appreciates the roles of a variety of health care providers, including consultants, therapists, nurses, home care workers, pharmacists, and social workers</p> <p>Advocates for quality patient care</p> <p><i>Example:</i><br/>The physician<br/>1. Identifies patient issues that are beyond his or her personal scope and abilities and may require consultation</p> | <p>Knows unique roles of and services provided by local health care delivery systems and how to access these resources for patient care</p> <p>Knows and appreciates the roles of a variety of health care providers, including consultants, therapists, nurses, home care workers, pharmacists, and social workers</p> <p>Advocates for quality patient care</p> <p><i>Example:</i><br/>The physician<br/>1. Places consults for non-urologic issues affecting individual patients<br/>2. Reconciles medications at transfer</p> | <p>Manages and coordinates care and care transitions across multiple delivery systems, including ambulatory, subspecialty, acute, rehabilitation, and skilled nursing</p> <p>Advocates for quality patient care and optimal patient care systems</p> <p><i>Example:</i><br/>The physician<br/>1. Involves the primary care physician and other consultants appropriately in the care of individual patients<br/>2. Facilitates performance of the interprofessional care team by (a) timely, clear communication/updating of patient condition and orders; and (b) skillful, respectful interaction (see ICS); complies with communication protocols<br/>3. Reconciles medications at transfer</p> | <p>Discusses non-pharmacologic and non-procedural patient resources (such as physical therapy, social work, alternative medicine providers, chaplains, etc.) with patients and families</p> <p>Demonstrates how to lead a health care team by utilizing the skills and coordinating the activities of interprofessional team members (physician extenders/mid-levels, nurses, medical students, allied health workers, etc.)</p> <p>Negotiates patient-centered care among multiple care providers</p> <p><i>Example:</i><br/>The physician<br/>1. Coordinates the interprofessional care team by (a) anticipating the need for multi-disciplinary involvement; and (b) skillful, respectful interaction with all team members (see ICS); and complies with communication protocols<br/>2. Plans for appropriate post-hospitalization care of the patient</p> | <p>Is adept at systems thinking</p> <p>Capably leads the health care team, using his or her personal role as leader</p> <p>Contributes meaningfully to interprofessional teams</p> <p><i>Example:</i><br/>The physician<br/>1. Capably leads interprofessional care teams by (a) anticipating the need for multi-disciplinary involvement; and (b) skillful, respectful interaction with all team members (see ICS)<br/>2. Aligns appropriate post-hospitalization care of the patient</p> | <p>PS<br/>QI</p>                                                                           | <p><b>Systems-Based Practice 1: Patient Safety and Quality Improvement</b></p> <table border="1"> <thead> <tr> <th>Level 1</th> <th>Level 2</th> <th>Level 3</th> <th>Level 4</th> <th>Level 5</th> </tr> </thead> <tbody> <tr> <td>Demonstrates knowledge of common patient safety events and institutional reporting system</td> <td>Identifies and reports patient safety events</td> <td>Participates in analysis of patient safety events (simulated or actual)</td> <td>Offers strategies (simulated or actual) to prevent patient safety events</td> <td>Actively engages and leads teams and processes to prevent patient safety events</td> </tr> <tr> <td>Demonstrates knowledge of basic quality improvement methodologies and metrics</td> <td>Describes local quality improvement initiatives (e.g., multimodal analgesics, antibiotic stewardship, smoking cessation, hospital acquired infection)</td> <td>Participates in local quality improvement initiatives</td> <td>Demonstrates the skills required to identify, develop, implement, and analyze a quality improvement project</td> <td>Creates, implements, and assesses quality improvement initiatives at the institutional or community level</td> </tr> </tbody> </table> | Level 1                                                                                                                       | Level 2                                                                               | Level 3                                                                                                                     | Level 4                                                                                  | Level 5                                                                                                     | Demonstrates knowledge of common patient safety events and institutional reporting system                         | Identifies and reports patient safety events | Participates in analysis of patient safety events (simulated or actual) | Offers strategies (simulated or actual) to prevent patient safety events | Actively engages and leads teams and processes to prevent patient safety events | Demonstrates knowledge of basic quality improvement methodologies and metrics | Describes local quality improvement initiatives (e.g., multimodal analgesics, antibiotic stewardship, smoking cessation, hospital acquired infection) | Participates in local quality improvement initiatives | Demonstrates the skills required to identify, develop, implement, and analyze a quality improvement project | Creates, implements, and assesses quality improvement initiatives at the institutional or community level |
| Has not achieved Level 1                                                                                                                                                                             | Level 1                                                                                                                                                                                                                                                                                                                                                                                                                                                                                                                         | Level 2                                                                                                                                                                                                                                                                                                                                                                                                                                                                                                                                                                                                                                                                                                                                                                                                                                                                                                                                                                                                                                                                                                                                                                                                                                                                                                                                                                                                                                                                                                                                                                                                                                                                                                                                                                                                                                                                                                                                                                                                                                                                                                                                                                                                                                                                                                                                                                                                                                                                                                                                                                                                                                                                                                                                                                                                                                                                                                                                                                                                                                                                                                                                                                                                                                                                                                                                                                                                                                                                                    | Level 3                                                                                                                                                                                                                                                                                                                                                                                                                                                                                                                                                                                                                                                                                            | Level 4                                                                                                                                                                                                                                                                                                                                                                                                                                                                                                                                                                                                                                                                                                                                                                                                                                                       | Level 5                                                                                                                                                                                                                                                                                                                                                                                                                                                                                    |         |         |                                                         |                                                                                                                          |                                                                                                                                                                                                                                                                                                                                                                                                                                                                                                                                 |                                                                                                                                                                                                                                                                                                                                                                                                                                                                                                                                   |                                                                                                                                                                                                                                                                                                                                                                                                                                                                                                                                                                                                                                                                                                    |                                                                                                                                                                                                                                                                                                                                                                                                                                                                                                                                                                                                                                                                                                                                                                                                                                                               |                                                                                                                                                                                                                                                                                                                                                                                                                                                                                            |                                                                                            |                                                                                                                                                                                                                                                                                                                                                                                                                                                                                                                                                                                                                                                                                                                                                                                                                                                                                                                                                                                                                                                                                                                                                                                                                                                      |                                                                                                                               |                                                                                       |                                                                                                                             |                                                                                          |                                                                                                             |                                                                                                                   |                                              |                                                                         |                                                                          |                                                                                 |                                                                               |                                                                                                                                                       |                                                       |                                                                                                             |                                                                                                           |
|                                                                                                                                                                                                      | <p>Describes basic levels of systems of care</p> <p>Identifies the types of health care providers within a health care delivery system</p> <p>Knows and appreciates the roles of a variety of health care providers, including consultants, therapists, nurses, home care workers, pharmacists, and social workers</p> <p>Advocates for quality patient care</p> <p><i>Example:</i><br/>The physician<br/>1. Identifies patient issues that are beyond his or her personal scope and abilities and may require consultation</p> | <p>Knows unique roles of and services provided by local health care delivery systems and how to access these resources for patient care</p> <p>Knows and appreciates the roles of a variety of health care providers, including consultants, therapists, nurses, home care workers, pharmacists, and social workers</p> <p>Advocates for quality patient care</p> <p><i>Example:</i><br/>The physician<br/>1. Places consults for non-urologic issues affecting individual patients<br/>2. Reconciles medications at transfer</p>                                                                                                                                                                                                                                                                                                                                                                                                                                                                                                                                                                                                                                                                                                                                                                                                                                                                                                                                                                                                                                                                                                                                                                                                                                                                                                                                                                                                                                                                                                                                                                                                                                                                                                                                                                                                                                                                                                                                                                                                                                                                                                                                                                                                                                                                                                                                                                                                                                                                                                                                                                                                                                                                                                                                                                                                                                                                                                                                                          | <p>Manages and coordinates care and care transitions across multiple delivery systems, including ambulatory, subspecialty, acute, rehabilitation, and skilled nursing</p> <p>Advocates for quality patient care and optimal patient care systems</p> <p><i>Example:</i><br/>The physician<br/>1. Involves the primary care physician and other consultants appropriately in the care of individual patients<br/>2. Facilitates performance of the interprofessional care team by (a) timely, clear communication/updating of patient condition and orders; and (b) skillful, respectful interaction (see ICS); complies with communication protocols<br/>3. Reconciles medications at transfer</p> | <p>Discusses non-pharmacologic and non-procedural patient resources (such as physical therapy, social work, alternative medicine providers, chaplains, etc.) with patients and families</p> <p>Demonstrates how to lead a health care team by utilizing the skills and coordinating the activities of interprofessional team members (physician extenders/mid-levels, nurses, medical students, allied health workers, etc.)</p> <p>Negotiates patient-centered care among multiple care providers</p> <p><i>Example:</i><br/>The physician<br/>1. Coordinates the interprofessional care team by (a) anticipating the need for multi-disciplinary involvement; and (b) skillful, respectful interaction with all team members (see ICS); and complies with communication protocols<br/>2. Plans for appropriate post-hospitalization care of the patient</p> | <p>Is adept at systems thinking</p> <p>Capably leads the health care team, using his or her personal role as leader</p> <p>Contributes meaningfully to interprofessional teams</p> <p><i>Example:</i><br/>The physician<br/>1. Capably leads interprofessional care teams by (a) anticipating the need for multi-disciplinary involvement; and (b) skillful, respectful interaction with all team members (see ICS)<br/>2. Aligns appropriate post-hospitalization care of the patient</p> |         |         |                                                         |                                                                                                                          |                                                                                                                                                                                                                                                                                                                                                                                                                                                                                                                                 |                                                                                                                                                                                                                                                                                                                                                                                                                                                                                                                                   |                                                                                                                                                                                                                                                                                                                                                                                                                                                                                                                                                                                                                                                                                                    |                                                                                                                                                                                                                                                                                                                                                                                                                                                                                                                                                                                                                                                                                                                                                                                                                                                               |                                                                                                                                                                                                                                                                                                                                                                                                                                                                                            |                                                                                            |                                                                                                                                                                                                                                                                                                                                                                                                                                                                                                                                                                                                                                                                                                                                                                                                                                                                                                                                                                                                                                                                                                                                                                                                                                                      |                                                                                                                               |                                                                                       |                                                                                                                             |                                                                                          |                                                                                                             |                                                                                                                   |                                              |                                                                         |                                                                          |                                                                                 |                                                                               |                                                                                                                                                       |                                                       |                                                                                                             |                                                                                                           |
| Level 1                                                                                                                                                                                              | Level 2                                                                                                                                                                                                                                                                                                                                                                                                                                                                                                                         | Level 3                                                                                                                                                                                                                                                                                                                                                                                                                                                                                                                                                                                                                                                                                                                                                                                                                                                                                                                                                                                                                                                                                                                                                                                                                                                                                                                                                                                                                                                                                                                                                                                                                                                                                                                                                                                                                                                                                                                                                                                                                                                                                                                                                                                                                                                                                                                                                                                                                                                                                                                                                                                                                                                                                                                                                                                                                                                                                                                                                                                                                                                                                                                                                                                                                                                                                                                                                                                                                                                                                    | Level 4                                                                                                                                                                                                                                                                                                                                                                                                                                                                                                                                                                                                                                                                                            | Level 5                                                                                                                                                                                                                                                                                                                                                                                                                                                                                                                                                                                                                                                                                                                                                                                                                                                       |                                                                                                                                                                                                                                                                                                                                                                                                                                                                                            |         |         |                                                         |                                                                                                                          |                                                                                                                                                                                                                                                                                                                                                                                                                                                                                                                                 |                                                                                                                                                                                                                                                                                                                                                                                                                                                                                                                                   |                                                                                                                                                                                                                                                                                                                                                                                                                                                                                                                                                                                                                                                                                                    |                                                                                                                                                                                                                                                                                                                                                                                                                                                                                                                                                                                                                                                                                                                                                                                                                                                               |                                                                                                                                                                                                                                                                                                                                                                                                                                                                                            |                                                                                            |                                                                                                                                                                                                                                                                                                                                                                                                                                                                                                                                                                                                                                                                                                                                                                                                                                                                                                                                                                                                                                                                                                                                                                                                                                                      |                                                                                                                               |                                                                                       |                                                                                                                             |                                                                                          |                                                                                                             |                                                                                                                   |                                              |                                                                         |                                                                          |                                                                                 |                                                                               |                                                                                                                                                       |                                                       |                                                                                                             |                                                                                                           |
| Demonstrates knowledge of common patient safety events and institutional reporting system                                                                                                            | Identifies and reports patient safety events                                                                                                                                                                                                                                                                                                                                                                                                                                                                                    | Participates in analysis of patient safety events (simulated or actual)                                                                                                                                                                                                                                                                                                                                                                                                                                                                                                                                                                                                                                                                                                                                                                                                                                                                                                                                                                                                                                                                                                                                                                                                                                                                                                                                                                                                                                                                                                                                                                                                                                                                                                                                                                                                                                                                                                                                                                                                                                                                                                                                                                                                                                                                                                                                                                                                                                                                                                                                                                                                                                                                                                                                                                                                                                                                                                                                                                                                                                                                                                                                                                                                                                                                                                                                                                                                                    | Offers strategies (simulated or actual) to prevent patient safety events                                                                                                                                                                                                                                                                                                                                                                                                                                                                                                                                                                                                                           | Actively engages and leads teams and processes to prevent patient safety events                                                                                                                                                                                                                                                                                                                                                                                                                                                                                                                                                                                                                                                                                                                                                                               |                                                                                                                                                                                                                                                                                                                                                                                                                                                                                            |         |         |                                                         |                                                                                                                          |                                                                                                                                                                                                                                                                                                                                                                                                                                                                                                                                 |                                                                                                                                                                                                                                                                                                                                                                                                                                                                                                                                   |                                                                                                                                                                                                                                                                                                                                                                                                                                                                                                                                                                                                                                                                                                    |                                                                                                                                                                                                                                                                                                                                                                                                                                                                                                                                                                                                                                                                                                                                                                                                                                                               |                                                                                                                                                                                                                                                                                                                                                                                                                                                                                            |                                                                                            |                                                                                                                                                                                                                                                                                                                                                                                                                                                                                                                                                                                                                                                                                                                                                                                                                                                                                                                                                                                                                                                                                                                                                                                                                                                      |                                                                                                                               |                                                                                       |                                                                                                                             |                                                                                          |                                                                                                             |                                                                                                                   |                                              |                                                                         |                                                                          |                                                                                 |                                                                               |                                                                                                                                                       |                                                       |                                                                                                             |                                                                                                           |
| Demonstrates knowledge of basic quality improvement methodologies and metrics                                                                                                                        | Describes local quality improvement initiatives (e.g., multimodal analgesics, antibiotic stewardship, smoking cessation, hospital acquired infection)                                                                                                                                                                                                                                                                                                                                                                           | Participates in local quality improvement initiatives                                                                                                                                                                                                                                                                                                                                                                                                                                                                                                                                                                                                                                                                                                                                                                                                                                                                                                                                                                                                                                                                                                                                                                                                                                                                                                                                                                                                                                                                                                                                                                                                                                                                                                                                                                                                                                                                                                                                                                                                                                                                                                                                                                                                                                                                                                                                                                                                                                                                                                                                                                                                                                                                                                                                                                                                                                                                                                                                                                                                                                                                                                                                                                                                                                                                                                                                                                                                                                      | Demonstrates the skills required to identify, develop, implement, and analyze a quality improvement project                                                                                                                                                                                                                                                                                                                                                                                                                                                                                                                                                                                        | Creates, implements, and assesses quality improvement initiatives at the institutional or community level                                                                                                                                                                                                                                                                                                                                                                                                                                                                                                                                                                                                                                                                                                                                                     |                                                                                                                                                                                                                                                                                                                                                                                                                                                                                            |         |         |                                                         |                                                                                                                          |                                                                                                                                                                                                                                                                                                                                                                                                                                                                                                                                 |                                                                                                                                                                                                                                                                                                                                                                                                                                                                                                                                   |                                                                                                                                                                                                                                                                                                                                                                                                                                                                                                                                                                                                                                                                                                    |                                                                                                                                                                                                                                                                                                                                                                                                                                                                                                                                                                                                                                                                                                                                                                                                                                                               |                                                                                                                                                                                                                                                                                                                                                                                                                                                                                            |                                                                                            |                                                                                                                                                                                                                                                                                                                                                                                                                                                                                                                                                                                                                                                                                                                                                                                                                                                                                                                                                                                                                                                                                                                                                                                                                                                      |                                                                                                                               |                                                                                       |                                                                                                                             |                                                                                          |                                                                                                             |                                                                                                                   |                                              |                                                                         |                                                                          |                                                                                 |                                                                               |                                                                                                                                                       |                                                       |                                                                                                             |                                                                                                           |



| <p><b>Urology</b></p> <p>HC Costs and Resources</p>                                                                                                                                                                                                                      | <p><b>SBP2. Incorporates cost awareness and risk-benefit analysis into patient care.</b></p> <table border="1"> <thead> <tr> <th>Has not achieved Level 1</th> <th>Level 1</th> <th>Level 2</th> <th>Level 3</th> <th>Level 4</th> <th>Level 5</th> </tr> </thead> <tbody> <tr> <td></td> <td> <p>Recognizes the concept of risk-benefit analysis associated with obtaining and providing health care</p> <p>Identifies basic laboratory and radiographic tests that are commonly performed, recognizing that each is associated with specific costs</p> <p><i>Example:</i><br/>The physician<br/>1. Recognizes the physician's creed to "First, do no harm"<br/>2. Understands the information conveyed by basic laboratory tests</p> </td> <td> <p>Knows common socio-economic barriers that impact patient care</p> <p>Describes how cost-benefit analysis is applied to patient care</p> <p>Knows relative costs of frequently used diagnostic and therapeutic interventions, such as CT vs. magnetic resonance imaging (MRI) scans, and the extent and ways they contribute to diagnostic accuracy and positive patient outcomes</p> <p><i>Example:</i><br/>The physician<br/>1. Understands that health care setting, insurance provider, and patient factors may impact on individual's choice between various clinical investigations<br/>2. Orders appropriate laboratory tests and radiographic studies<br/>3. Has a beginning appreciation of the cost of OR equipment</p> </td> <td> <p>Identifies the role of various health care stakeholders (health care systems, hospitals, insurance carriers, health care providers, etc.) and their varied impact on the cost of and access to health care</p> <p>Demonstrates the incorporation of cost awareness and risk-benefit principles into standard clinical judgments and decision-making</p> <p><i>Example:</i><br/>The physician<br/>1. Selects diagnostic tests and interventions that have a high probability of adding value to patient care in common clinical scenarios<br/>2. Minimizes unnecessary care, including laboratory tests and radiographic studies, such as by not re-ordering tests performed at other facilities<br/>3. Has some appreciation of the efficient use of various OR equipment (e.g., doesn't open up more endoscopic instruments than are needed at the beginning of a procedure)</p> </td> <td> <p>Demonstrates the incorporation of cost awareness and risk-benefit principles into complex clinical scenarios</p> <p>Minimizes unnecessary care by ordering appropriate laboratory tests and radiographic studies</p> <p>Uses essential equipment with efficiency in the OR</p> <p><i>Example:</i><br/>The physician<br/>1. Has knowledge of urology billing codes<br/>2. Understands reimbursement principles<br/>3. Efficiently uses laboratory testing, complex studies, and equipment necessary in the care of individual patients</p> </td> <td> <p>Consistently incorporates cost awareness and risk-benefit principles into all clinical scenarios</p> <p>Masterfully uses common and highly-specialized equipment within the OR</p> <p><i>Example:</i><br/>The physician<br/>1. Capably applies urology billing codes<br/>2. Follows situation-specific reimbursement principles<br/>3. Efficiently uses common and infrequently-used laboratory testing, complex studies, and equipment necessary in the care of individual patients</p> </td> </tr> </tbody> </table>                                                                                                                                                                                                                               | Has not achieved Level 1                                                                                                                                                                                                                                                                                                                                                                                                                                                                                                                                                                                                                                                                                                                                                                                                                                | Level 1                                                                                                                                                                                                                                                                                                                                                                                                                                                                                                                                                                                                                                                                                                                                                                                                                                                                              | Level 2                                                                                                                                                                                                                                                                                                                                                                                                                                                                                                                                                                              | Level 3                                                                                                                                                                                                                                                                                                                                                                                                                                                                                                                                                                                     | Level 4 | Level 5 |  | <p>Recognizes the concept of risk-benefit analysis associated with obtaining and providing health care</p> <p>Identifies basic laboratory and radiographic tests that are commonly performed, recognizing that each is associated with specific costs</p> <p><i>Example:</i><br/>The physician<br/>1. Recognizes the physician's creed to "First, do no harm"<br/>2. Understands the information conveyed by basic laboratory tests</p>  | <p>Knows common socio-economic barriers that impact patient care</p> <p>Describes how cost-benefit analysis is applied to patient care</p> <p>Knows relative costs of frequently used diagnostic and therapeutic interventions, such as CT vs. magnetic resonance imaging (MRI) scans, and the extent and ways they contribute to diagnostic accuracy and positive patient outcomes</p> <p><i>Example:</i><br/>The physician<br/>1. Understands that health care setting, insurance provider, and patient factors may impact on individual's choice between various clinical investigations<br/>2. Orders appropriate laboratory tests and radiographic studies<br/>3. Has a beginning appreciation of the cost of OR equipment</p>                                                                                                                     | <p>Identifies the role of various health care stakeholders (health care systems, hospitals, insurance carriers, health care providers, etc.) and their varied impact on the cost of and access to health care</p> <p>Demonstrates the incorporation of cost awareness and risk-benefit principles into standard clinical judgments and decision-making</p> <p><i>Example:</i><br/>The physician<br/>1. Selects diagnostic tests and interventions that have a high probability of adding value to patient care in common clinical scenarios<br/>2. Minimizes unnecessary care, including laboratory tests and radiographic studies, such as by not re-ordering tests performed at other facilities<br/>3. Has some appreciation of the efficient use of various OR equipment (e.g., doesn't open up more endoscopic instruments than are needed at the beginning of a procedure)</p> | <p>Demonstrates the incorporation of cost awareness and risk-benefit principles into complex clinical scenarios</p> <p>Minimizes unnecessary care by ordering appropriate laboratory tests and radiographic studies</p> <p>Uses essential equipment with efficiency in the OR</p> <p><i>Example:</i><br/>The physician<br/>1. Has knowledge of urology billing codes<br/>2. Understands reimbursement principles<br/>3. Efficiently uses laboratory testing, complex studies, and equipment necessary in the care of individual patients</p>                                         | <p>Consistently incorporates cost awareness and risk-benefit principles into all clinical scenarios</p> <p>Masterfully uses common and highly-specialized equipment within the OR</p> <p><i>Example:</i><br/>The physician<br/>1. Capably applies urology billing codes<br/>2. Follows situation-specific reimbursement principles<br/>3. Efficiently uses common and infrequently-used laboratory testing, complex studies, and equipment necessary in the care of individual patients</p>                                                                                                 | <p>CC</p>         | <p><b>Systems-Based Practice 2: System Navigation for Patient-Centered Care</b></p> <table border="1"> <thead> <tr> <th>Level 1</th> <th>Level 2</th> <th>Level 3</th> <th>Level 4</th> <th>Level 5</th> </tr> </thead> <tbody> <tr> <td> <p>Demonstrates knowledge of care coordination and community health needs</p> <p>Performs safe and effective transitions of care/hand-offs in routine clinical situations</p> </td> <td> <p>Coordinates multidisciplinary care of patients in routine clinical situations, considering inequities and disparities for their local population (e.g., cultural barriers)</p> <p>Performs safe and effective transitions of care/hand-offs in complex clinical situations</p> </td> <td> <p>Coordinates multidisciplinary care of patients in complex clinical situation and incorporates local resources into the plan (e.g., home parental nutrition, postoperative intravenous feeding, intensive care unit)</p> <p>Supervises safe and effective transitions of care/hand-offs of junior residents</p> </td> <td> <p>Leads care coordination of patients with barriers or other disparities in care (e.g., trauma patient with no access to care)</p> <p>Resolves conflicts in transitions of care between teams</p> </td> <td> <p>Designs innovative care coordination strategies for populations with health care inequities</p> <p>Leads in the design and implementation of improvements to transitions of care</p> </td> </tr> </tbody> </table>                                                                                                                                                                  | Level 1 | Level 2 | Level 3 | Level 4 | Level 5 | <p>Demonstrates knowledge of care coordination and community health needs</p> <p>Performs safe and effective transitions of care/hand-offs in routine clinical situations</p>                                                                                            | <p>Coordinates multidisciplinary care of patients in routine clinical situations, considering inequities and disparities for their local population (e.g., cultural barriers)</p> <p>Performs safe and effective transitions of care/hand-offs in complex clinical situations</p>  | <p>Coordinates multidisciplinary care of patients in complex clinical situation and incorporates local resources into the plan (e.g., home parental nutrition, postoperative intravenous feeding, intensive care unit)</p> <p>Supervises safe and effective transitions of care/hand-offs of junior residents</p>                   | <p>Leads care coordination of patients with barriers or other disparities in care (e.g., trauma patient with no access to care)</p> <p>Resolves conflicts in transitions of care between teams</p>                                                                   | <p>Designs innovative care coordination strategies for populations with health care inequities</p> <p>Leads in the design and implementation of improvements to transitions of care</p> |
|--------------------------------------------------------------------------------------------------------------------------------------------------------------------------------------------------------------------------------------------------------------------------|------------------------------------------------------------------------------------------------------------------------------------------------------------------------------------------------------------------------------------------------------------------------------------------------------------------------------------------------------------------------------------------------------------------------------------------------------------------------------------------------------------------------------------------------------------------------------------------------------------------------------------------------------------------------------------------------------------------------------------------------------------------------------------------------------------------------------------------------------------------------------------------------------------------------------------------------------------------------------------------------------------------------------------------------------------------------------------------------------------------------------------------------------------------------------------------------------------------------------------------------------------------------------------------------------------------------------------------------------------------------------------------------------------------------------------------------------------------------------------------------------------------------------------------------------------------------------------------------------------------------------------------------------------------------------------------------------------------------------------------------------------------------------------------------------------------------------------------------------------------------------------------------------------------------------------------------------------------------------------------------------------------------------------------------------------------------------------------------------------------------------------------------------------------------------------------------------------------------------------------------------------------------------------------------------------------------------------------------------------------------------------------------------------------------------------------------------------------------------------------------------------------------------------------------------------------------------------------------------------------------------------------------------------------------------------------------------------------------------------------------------------------------------------------------------------------------------------------------------------------------------------------------------------------------------------------------------------------------------------------------------------------------------------------------------------------------------------------------------------------------------------------------------------------------------------------------------------------------------------------------------------------------------------------------------------------------------------------------------------------------------------------------------------------------------------------------------------------------------------------------------------------------------------------------------------------------------------------------------------------------------------------------------------------------------------------------------------------|---------------------------------------------------------------------------------------------------------------------------------------------------------------------------------------------------------------------------------------------------------------------------------------------------------------------------------------------------------------------------------------------------------------------------------------------------------------------------------------------------------------------------------------------------------------------------------------------------------------------------------------------------------------------------------------------------------------------------------------------------------------------------------------------------------------------------------------------------------|--------------------------------------------------------------------------------------------------------------------------------------------------------------------------------------------------------------------------------------------------------------------------------------------------------------------------------------------------------------------------------------------------------------------------------------------------------------------------------------------------------------------------------------------------------------------------------------------------------------------------------------------------------------------------------------------------------------------------------------------------------------------------------------------------------------------------------------------------------------------------------------|--------------------------------------------------------------------------------------------------------------------------------------------------------------------------------------------------------------------------------------------------------------------------------------------------------------------------------------------------------------------------------------------------------------------------------------------------------------------------------------------------------------------------------------------------------------------------------------|---------------------------------------------------------------------------------------------------------------------------------------------------------------------------------------------------------------------------------------------------------------------------------------------------------------------------------------------------------------------------------------------------------------------------------------------------------------------------------------------------------------------------------------------------------------------------------------------|---------|---------|--|------------------------------------------------------------------------------------------------------------------------------------------------------------------------------------------------------------------------------------------------------------------------------------------------------------------------------------------------------------------------------------------------------------------------------------------|---------------------------------------------------------------------------------------------------------------------------------------------------------------------------------------------------------------------------------------------------------------------------------------------------------------------------------------------------------------------------------------------------------------------------------------------------------------------------------------------------------------------------------------------------------------------------------------------------------------------------------------------------------------------------------------------------------------------------------------------------------------------------------------------------------------------------------------------------------|--------------------------------------------------------------------------------------------------------------------------------------------------------------------------------------------------------------------------------------------------------------------------------------------------------------------------------------------------------------------------------------------------------------------------------------------------------------------------------------------------------------------------------------------------------------------------------------------------------------------------------------------------------------------------------------------------------------------------------------------------------------------------------------------------------------------------------------------------------------------------------------|--------------------------------------------------------------------------------------------------------------------------------------------------------------------------------------------------------------------------------------------------------------------------------------------------------------------------------------------------------------------------------------------------------------------------------------------------------------------------------------------------------------------------------------------------------------------------------------|---------------------------------------------------------------------------------------------------------------------------------------------------------------------------------------------------------------------------------------------------------------------------------------------------------------------------------------------------------------------------------------------------------------------------------------------------------------------------------------------------------------------------------------------------------------------------------------------|-------------------|-------------------------------------------------------------------------------------------------------------------------------------------------------------------------------------------------------------------------------------------------------------------------------------------------------------------------------------------------------------------------------------------------------------------------------------------------------------------------------------------------------------------------------------------------------------------------------------------------------------------------------------------------------------------------------------------------------------------------------------------------------------------------------------------------------------------------------------------------------------------------------------------------------------------------------------------------------------------------------------------------------------------------------------------------------------------------------------------------------------------------------------------------------------------------------------------------------------------------------------------------------------------------------------------------------------------------------------------------------------------------------------------------------------------------------------------------------------------------------------------------------------------------------------------------------------------------------------------------------------------------------------------------------------------|---------|---------|---------|---------|---------|--------------------------------------------------------------------------------------------------------------------------------------------------------------------------------------------------------------------------------------------------------------------------|------------------------------------------------------------------------------------------------------------------------------------------------------------------------------------------------------------------------------------------------------------------------------------|-------------------------------------------------------------------------------------------------------------------------------------------------------------------------------------------------------------------------------------------------------------------------------------------------------------------------------------|----------------------------------------------------------------------------------------------------------------------------------------------------------------------------------------------------------------------------------------------------------------------|-----------------------------------------------------------------------------------------------------------------------------------------------------------------------------------------|
| Has not achieved Level 1                                                                                                                                                                                                                                                 | Level 1                                                                                                                                                                                                                                                                                                                                                                                                                                                                                                                                                                                                                                                                                                                                                                                                                                                                                                                                                                                                                                                                                                                                                                                                                                                                                                                                                                                                                                                                                                                                                                                                                                                                                                                                                                                                                                                                                                                                                                                                                                                                                                                                                                                                                                                                                                                                                                                                                                                                                                                                                                                                                                                                                                                                                                                                                                                                                                                                                                                                                                                                                                                                                                                                                                                                                                                                                                                                                                                                                                                                                                                                                                                                                                          | Level 2                                                                                                                                                                                                                                                                                                                                                                                                                                                                                                                                                                                                                                                                                                                                                                                                                                                 | Level 3                                                                                                                                                                                                                                                                                                                                                                                                                                                                                                                                                                                                                                                                                                                                                                                                                                                                              | Level 4                                                                                                                                                                                                                                                                                                                                                                                                                                                                                                                                                                              | Level 5                                                                                                                                                                                                                                                                                                                                                                                                                                                                                                                                                                                     |         |         |  |                                                                                                                                                                                                                                                                                                                                                                                                                                          |                                                                                                                                                                                                                                                                                                                                                                                                                                                                                                                                                                                                                                                                                                                                                                                                                                                         |                                                                                                                                                                                                                                                                                                                                                                                                                                                                                                                                                                                                                                                                                                                                                                                                                                                                                      |                                                                                                                                                                                                                                                                                                                                                                                                                                                                                                                                                                                      |                                                                                                                                                                                                                                                                                                                                                                                                                                                                                                                                                                                             |                   |                                                                                                                                                                                                                                                                                                                                                                                                                                                                                                                                                                                                                                                                                                                                                                                                                                                                                                                                                                                                                                                                                                                                                                                                                                                                                                                                                                                                                                                                                                                                                                                                                                                                   |         |         |         |         |         |                                                                                                                                                                                                                                                                          |                                                                                                                                                                                                                                                                                    |                                                                                                                                                                                                                                                                                                                                     |                                                                                                                                                                                                                                                                      |                                                                                                                                                                                         |
|                                                                                                                                                                                                                                                                          | <p>Recognizes the concept of risk-benefit analysis associated with obtaining and providing health care</p> <p>Identifies basic laboratory and radiographic tests that are commonly performed, recognizing that each is associated with specific costs</p> <p><i>Example:</i><br/>The physician<br/>1. Recognizes the physician's creed to "First, do no harm"<br/>2. Understands the information conveyed by basic laboratory tests</p>                                                                                                                                                                                                                                                                                                                                                                                                                                                                                                                                                                                                                                                                                                                                                                                                                                                                                                                                                                                                                                                                                                                                                                                                                                                                                                                                                                                                                                                                                                                                                                                                                                                                                                                                                                                                                                                                                                                                                                                                                                                                                                                                                                                                                                                                                                                                                                                                                                                                                                                                                                                                                                                                                                                                                                                                                                                                                                                                                                                                                                                                                                                                                                                                                                                                          | <p>Knows common socio-economic barriers that impact patient care</p> <p>Describes how cost-benefit analysis is applied to patient care</p> <p>Knows relative costs of frequently used diagnostic and therapeutic interventions, such as CT vs. magnetic resonance imaging (MRI) scans, and the extent and ways they contribute to diagnostic accuracy and positive patient outcomes</p> <p><i>Example:</i><br/>The physician<br/>1. Understands that health care setting, insurance provider, and patient factors may impact on individual's choice between various clinical investigations<br/>2. Orders appropriate laboratory tests and radiographic studies<br/>3. Has a beginning appreciation of the cost of OR equipment</p>                                                                                                                     | <p>Identifies the role of various health care stakeholders (health care systems, hospitals, insurance carriers, health care providers, etc.) and their varied impact on the cost of and access to health care</p> <p>Demonstrates the incorporation of cost awareness and risk-benefit principles into standard clinical judgments and decision-making</p> <p><i>Example:</i><br/>The physician<br/>1. Selects diagnostic tests and interventions that have a high probability of adding value to patient care in common clinical scenarios<br/>2. Minimizes unnecessary care, including laboratory tests and radiographic studies, such as by not re-ordering tests performed at other facilities<br/>3. Has some appreciation of the efficient use of various OR equipment (e.g., doesn't open up more endoscopic instruments than are needed at the beginning of a procedure)</p> | <p>Demonstrates the incorporation of cost awareness and risk-benefit principles into complex clinical scenarios</p> <p>Minimizes unnecessary care by ordering appropriate laboratory tests and radiographic studies</p> <p>Uses essential equipment with efficiency in the OR</p> <p><i>Example:</i><br/>The physician<br/>1. Has knowledge of urology billing codes<br/>2. Understands reimbursement principles<br/>3. Efficiently uses laboratory testing, complex studies, and equipment necessary in the care of individual patients</p>                                         | <p>Consistently incorporates cost awareness and risk-benefit principles into all clinical scenarios</p> <p>Masterfully uses common and highly-specialized equipment within the OR</p> <p><i>Example:</i><br/>The physician<br/>1. Capably applies urology billing codes<br/>2. Follows situation-specific reimbursement principles<br/>3. Efficiently uses common and infrequently-used laboratory testing, complex studies, and equipment necessary in the care of individual patients</p>                                                                                                 |         |         |  |                                                                                                                                                                                                                                                                                                                                                                                                                                          |                                                                                                                                                                                                                                                                                                                                                                                                                                                                                                                                                                                                                                                                                                                                                                                                                                                         |                                                                                                                                                                                                                                                                                                                                                                                                                                                                                                                                                                                                                                                                                                                                                                                                                                                                                      |                                                                                                                                                                                                                                                                                                                                                                                                                                                                                                                                                                                      |                                                                                                                                                                                                                                                                                                                                                                                                                                                                                                                                                                                             |                   |                                                                                                                                                                                                                                                                                                                                                                                                                                                                                                                                                                                                                                                                                                                                                                                                                                                                                                                                                                                                                                                                                                                                                                                                                                                                                                                                                                                                                                                                                                                                                                                                                                                                   |         |         |         |         |         |                                                                                                                                                                                                                                                                          |                                                                                                                                                                                                                                                                                    |                                                                                                                                                                                                                                                                                                                                     |                                                                                                                                                                                                                                                                      |                                                                                                                                                                                         |
| Level 1                                                                                                                                                                                                                                                                  | Level 2                                                                                                                                                                                                                                                                                                                                                                                                                                                                                                                                                                                                                                                                                                                                                                                                                                                                                                                                                                                                                                                                                                                                                                                                                                                                                                                                                                                                                                                                                                                                                                                                                                                                                                                                                                                                                                                                                                                                                                                                                                                                                                                                                                                                                                                                                                                                                                                                                                                                                                                                                                                                                                                                                                                                                                                                                                                                                                                                                                                                                                                                                                                                                                                                                                                                                                                                                                                                                                                                                                                                                                                                                                                                                                          | Level 3                                                                                                                                                                                                                                                                                                                                                                                                                                                                                                                                                                                                                                                                                                                                                                                                                                                 | Level 4                                                                                                                                                                                                                                                                                                                                                                                                                                                                                                                                                                                                                                                                                                                                                                                                                                                                              | Level 5                                                                                                                                                                                                                                                                                                                                                                                                                                                                                                                                                                              |                                                                                                                                                                                                                                                                                                                                                                                                                                                                                                                                                                                             |         |         |  |                                                                                                                                                                                                                                                                                                                                                                                                                                          |                                                                                                                                                                                                                                                                                                                                                                                                                                                                                                                                                                                                                                                                                                                                                                                                                                                         |                                                                                                                                                                                                                                                                                                                                                                                                                                                                                                                                                                                                                                                                                                                                                                                                                                                                                      |                                                                                                                                                                                                                                                                                                                                                                                                                                                                                                                                                                                      |                                                                                                                                                                                                                                                                                                                                                                                                                                                                                                                                                                                             |                   |                                                                                                                                                                                                                                                                                                                                                                                                                                                                                                                                                                                                                                                                                                                                                                                                                                                                                                                                                                                                                                                                                                                                                                                                                                                                                                                                                                                                                                                                                                                                                                                                                                                                   |         |         |         |         |         |                                                                                                                                                                                                                                                                          |                                                                                                                                                                                                                                                                                    |                                                                                                                                                                                                                                                                                                                                     |                                                                                                                                                                                                                                                                      |                                                                                                                                                                                         |
| <p>Demonstrates knowledge of care coordination and community health needs</p> <p>Performs safe and effective transitions of care/hand-offs in routine clinical situations</p>                                                                                            | <p>Coordinates multidisciplinary care of patients in routine clinical situations, considering inequities and disparities for their local population (e.g., cultural barriers)</p> <p>Performs safe and effective transitions of care/hand-offs in complex clinical situations</p>                                                                                                                                                                                                                                                                                                                                                                                                                                                                                                                                                                                                                                                                                                                                                                                                                                                                                                                                                                                                                                                                                                                                                                                                                                                                                                                                                                                                                                                                                                                                                                                                                                                                                                                                                                                                                                                                                                                                                                                                                                                                                                                                                                                                                                                                                                                                                                                                                                                                                                                                                                                                                                                                                                                                                                                                                                                                                                                                                                                                                                                                                                                                                                                                                                                                                                                                                                                                                                | <p>Coordinates multidisciplinary care of patients in complex clinical situation and incorporates local resources into the plan (e.g., home parental nutrition, postoperative intravenous feeding, intensive care unit)</p> <p>Supervises safe and effective transitions of care/hand-offs of junior residents</p>                                                                                                                                                                                                                                                                                                                                                                                                                                                                                                                                       | <p>Leads care coordination of patients with barriers or other disparities in care (e.g., trauma patient with no access to care)</p> <p>Resolves conflicts in transitions of care between teams</p>                                                                                                                                                                                                                                                                                                                                                                                                                                                                                                                                                                                                                                                                                   | <p>Designs innovative care coordination strategies for populations with health care inequities</p> <p>Leads in the design and implementation of improvements to transitions of care</p>                                                                                                                                                                                                                                                                                                                                                                                              |                                                                                                                                                                                                                                                                                                                                                                                                                                                                                                                                                                                             |         |         |  |                                                                                                                                                                                                                                                                                                                                                                                                                                          |                                                                                                                                                                                                                                                                                                                                                                                                                                                                                                                                                                                                                                                                                                                                                                                                                                                         |                                                                                                                                                                                                                                                                                                                                                                                                                                                                                                                                                                                                                                                                                                                                                                                                                                                                                      |                                                                                                                                                                                                                                                                                                                                                                                                                                                                                                                                                                                      |                                                                                                                                                                                                                                                                                                                                                                                                                                                                                                                                                                                             |                   |                                                                                                                                                                                                                                                                                                                                                                                                                                                                                                                                                                                                                                                                                                                                                                                                                                                                                                                                                                                                                                                                                                                                                                                                                                                                                                                                                                                                                                                                                                                                                                                                                                                                   |         |         |         |         |         |                                                                                                                                                                                                                                                                          |                                                                                                                                                                                                                                                                                    |                                                                                                                                                                                                                                                                                                                                     |                                                                                                                                                                                                                                                                      |                                                                                                                                                                                         |
| <p><b>Urology</b></p> <p>Teams PS</p>                                                                                                                                                                                                                                    | <p><b>SBP2. Works in inter-professional teams to enhance patient safety.</b></p> <table border="1"> <thead> <tr> <th>Has not achieved Level 1</th> <th>Level 1</th> <th>Level 2</th> <th>Level 3</th> <th>Level 4</th> <th>Level 5</th> </tr> </thead> <tbody> <tr> <td></td> <td> <p>Recognizes teamwork and communication failure in health care as leading cause of preventable patient harm</p> <p>Identifies critical incidents, such as near misses and preventable medical errors</p> <p><i>Example:</i><br/>The physician<br/>1. Observes quality improvement (Morbidity and Mortality [M&amp;M]) conferences (as appropriate and able)<br/>2. Participates in discussions of medical errors that have occurred</p> </td> <td> <p>Identifies, reflects upon, and learns from critical incidents such as near misses and preventable medical errors</p> <p>Recognizes health system factors that increase the risk for error, including medical device design, flawed processes, easily confused medications, barriers to optimal patient care, and competing interests of different stakeholders</p> <p>Describes the value and use of techniques and tools for preventing adverse events, including checklists, briefings, and structured communication and teamwork protocols</p> <p><i>Example:</i><br/>The physician<br/>1. Participates in quality improvement (M&amp;M) conferences<br/>2. Identifies medical errors that have occurred<br/>3. Describes key elements of a structured communication technique, such as Situation-Background-Assessment-Recommendation (SBAR)</p> </td> <td> <p>Dialogues with care team members to identify risk for and prevention of medical errors</p> <p>Understands methods for analysis and correction of systems errors</p> <p>Applies structured communication techniques and tools, such as SBAR, during hand-offs and changes in patient condition</p> <p>Leads briefings and executes basic teamwork techniques designed to prevent adverse events (such as those in Crew Resource Management [CRM])</p> <p><i>Example:</i><br/>The physician<br/>1. Communicates systems errors via appropriate channels<br/>2. Demonstrates the ability to learn from medical errors that occur<br/>3. Partners and performs system improvement as a team member<br/>4. Performs CRM techniques such as "read back" of a critical laboratory result or a verbal order given to assure accurate communication ("closed loop")</p> </td> <td> <p>Leads team analysis of the effectiveness of techniques applied to prevent errors</p> <p>Partners with other health care professionals to identify, propose, and implement improvement opportunities within the system</p> <p>Uses specialized principles and techniques to study potential sources and causes of errors</p> <p><i>Example:</i><br/>The physician<br/>1. Provides insight and guidance regarding quality improvement at conferences and in daily clinical work<br/>2. Suggests and designs a system improvement/solution<br/>3. Uses root cause analysis (RCA)</p> </td> <td> <p>Develops and evaluates communication and teamwork techniques designed to prevent medical errors</p> <p>Uses advanced specialized techniques to study potential sources and causes of errors</p> <p>Coordinates and/or leads system quality improvement studies and implementation interventions</p> <p><i>Example:</i><br/>The physician;<br/>1. Uses failure mode effect analysis (FMEA) or human factors engineering principles (HFE)<br/>2. Consistently leads toward quality improvement at conferences and in daily clinical work<br/>3. Implements system improvement/solution</p> </td> </tr> </tbody> </table> | Has not achieved Level 1                                                                                                                                                                                                                                                                                                                                                                                                                                                                                                                                                                                                                                                                                                                                                                                                                                | Level 1                                                                                                                                                                                                                                                                                                                                                                                                                                                                                                                                                                                                                                                                                                                                                                                                                                                                              | Level 2                                                                                                                                                                                                                                                                                                                                                                                                                                                                                                                                                                              | Level 3                                                                                                                                                                                                                                                                                                                                                                                                                                                                                                                                                                                     | Level 4 | Level 5 |  | <p>Recognizes teamwork and communication failure in health care as leading cause of preventable patient harm</p> <p>Identifies critical incidents, such as near misses and preventable medical errors</p> <p><i>Example:</i><br/>The physician<br/>1. Observes quality improvement (Morbidity and Mortality [M&amp;M]) conferences (as appropriate and able)<br/>2. Participates in discussions of medical errors that have occurred</p> | <p>Identifies, reflects upon, and learns from critical incidents such as near misses and preventable medical errors</p> <p>Recognizes health system factors that increase the risk for error, including medical device design, flawed processes, easily confused medications, barriers to optimal patient care, and competing interests of different stakeholders</p> <p>Describes the value and use of techniques and tools for preventing adverse events, including checklists, briefings, and structured communication and teamwork protocols</p> <p><i>Example:</i><br/>The physician<br/>1. Participates in quality improvement (M&amp;M) conferences<br/>2. Identifies medical errors that have occurred<br/>3. Describes key elements of a structured communication technique, such as Situation-Background-Assessment-Recommendation (SBAR)</p> | <p>Dialogues with care team members to identify risk for and prevention of medical errors</p> <p>Understands methods for analysis and correction of systems errors</p> <p>Applies structured communication techniques and tools, such as SBAR, during hand-offs and changes in patient condition</p> <p>Leads briefings and executes basic teamwork techniques designed to prevent adverse events (such as those in Crew Resource Management [CRM])</p> <p><i>Example:</i><br/>The physician<br/>1. Communicates systems errors via appropriate channels<br/>2. Demonstrates the ability to learn from medical errors that occur<br/>3. Partners and performs system improvement as a team member<br/>4. Performs CRM techniques such as "read back" of a critical laboratory result or a verbal order given to assure accurate communication ("closed loop")</p>                    | <p>Leads team analysis of the effectiveness of techniques applied to prevent errors</p> <p>Partners with other health care professionals to identify, propose, and implement improvement opportunities within the system</p> <p>Uses specialized principles and techniques to study potential sources and causes of errors</p> <p><i>Example:</i><br/>The physician<br/>1. Provides insight and guidance regarding quality improvement at conferences and in daily clinical work<br/>2. Suggests and designs a system improvement/solution<br/>3. Uses root cause analysis (RCA)</p> | <p>Develops and evaluates communication and teamwork techniques designed to prevent medical errors</p> <p>Uses advanced specialized techniques to study potential sources and causes of errors</p> <p>Coordinates and/or leads system quality improvement studies and implementation interventions</p> <p><i>Example:</i><br/>The physician;<br/>1. Uses failure mode effect analysis (FMEA) or human factors engineering principles (HFE)<br/>2. Consistently leads toward quality improvement at conferences and in daily clinical work<br/>3. Implements system improvement/solution</p> | <p>HC Systems</p> | <p><b>Systems-Based Practice 3: Physician Role in Health Care Systems</b></p> <table border="1"> <thead> <tr> <th>Level 1</th> <th>Level 2</th> <th>Level 3</th> <th>Level 4</th> <th>Level 5</th> </tr> </thead> <tbody> <tr> <td> <p>Identifies basic needs for effective transition to practice (e.g., information technology, legal, billing and coding, financial, personnel)</p> <p>Describes basic health payment systems (e.g., government, private, public, uninsured care) and practice models</p> </td> <td> <p>Demonstrates use of information technology required for medical practice (e.g., electronic health record, documentation required for billing and coding)</p> <p>Describes how components of a complex health care system are interrelated and how this impacts patient care</p> </td> <td> <p>Describes core administrative knowledge needed for transition to independent practice (e.g., contract negotiations, malpractice insurance, government regulation, compliance)</p> <p>Discusses how individual practice affects the broader system performance (e.g., length of stay, readmission rates, clinical efficiency)</p> </td> <td> <p>Analyzes individual practice patterns and professional requirements in preparation for practice</p> <p>Manages various components of the complex health care system to provide efficient and effective patient care (e.g., patient payment models, insurance)</p> </td> <td> <p>Educates others to prepare them for transition to practice</p> <p>Advocates for or leads systems change that enhances high-value, efficient, and effective patient care</p> </td> </tr> </tbody> </table> | Level 1 | Level 2 | Level 3 | Level 4 | Level 5 | <p>Identifies basic needs for effective transition to practice (e.g., information technology, legal, billing and coding, financial, personnel)</p> <p>Describes basic health payment systems (e.g., government, private, public, uninsured care) and practice models</p> | <p>Demonstrates use of information technology required for medical practice (e.g., electronic health record, documentation required for billing and coding)</p> <p>Describes how components of a complex health care system are interrelated and how this impacts patient care</p> | <p>Describes core administrative knowledge needed for transition to independent practice (e.g., contract negotiations, malpractice insurance, government regulation, compliance)</p> <p>Discusses how individual practice affects the broader system performance (e.g., length of stay, readmission rates, clinical efficiency)</p> | <p>Analyzes individual practice patterns and professional requirements in preparation for practice</p> <p>Manages various components of the complex health care system to provide efficient and effective patient care (e.g., patient payment models, insurance)</p> | <p>Educates others to prepare them for transition to practice</p> <p>Advocates for or leads systems change that enhances high-value, efficient, and effective patient care</p>          |
| Has not achieved Level 1                                                                                                                                                                                                                                                 | Level 1                                                                                                                                                                                                                                                                                                                                                                                                                                                                                                                                                                                                                                                                                                                                                                                                                                                                                                                                                                                                                                                                                                                                                                                                                                                                                                                                                                                                                                                                                                                                                                                                                                                                                                                                                                                                                                                                                                                                                                                                                                                                                                                                                                                                                                                                                                                                                                                                                                                                                                                                                                                                                                                                                                                                                                                                                                                                                                                                                                                                                                                                                                                                                                                                                                                                                                                                                                                                                                                                                                                                                                                                                                                                                                          | Level 2                                                                                                                                                                                                                                                                                                                                                                                                                                                                                                                                                                                                                                                                                                                                                                                                                                                 | Level 3                                                                                                                                                                                                                                                                                                                                                                                                                                                                                                                                                                                                                                                                                                                                                                                                                                                                              | Level 4                                                                                                                                                                                                                                                                                                                                                                                                                                                                                                                                                                              | Level 5                                                                                                                                                                                                                                                                                                                                                                                                                                                                                                                                                                                     |         |         |  |                                                                                                                                                                                                                                                                                                                                                                                                                                          |                                                                                                                                                                                                                                                                                                                                                                                                                                                                                                                                                                                                                                                                                                                                                                                                                                                         |                                                                                                                                                                                                                                                                                                                                                                                                                                                                                                                                                                                                                                                                                                                                                                                                                                                                                      |                                                                                                                                                                                                                                                                                                                                                                                                                                                                                                                                                                                      |                                                                                                                                                                                                                                                                                                                                                                                                                                                                                                                                                                                             |                   |                                                                                                                                                                                                                                                                                                                                                                                                                                                                                                                                                                                                                                                                                                                                                                                                                                                                                                                                                                                                                                                                                                                                                                                                                                                                                                                                                                                                                                                                                                                                                                                                                                                                   |         |         |         |         |         |                                                                                                                                                                                                                                                                          |                                                                                                                                                                                                                                                                                    |                                                                                                                                                                                                                                                                                                                                     |                                                                                                                                                                                                                                                                      |                                                                                                                                                                                         |
|                                                                                                                                                                                                                                                                          | <p>Recognizes teamwork and communication failure in health care as leading cause of preventable patient harm</p> <p>Identifies critical incidents, such as near misses and preventable medical errors</p> <p><i>Example:</i><br/>The physician<br/>1. Observes quality improvement (Morbidity and Mortality [M&amp;M]) conferences (as appropriate and able)<br/>2. Participates in discussions of medical errors that have occurred</p>                                                                                                                                                                                                                                                                                                                                                                                                                                                                                                                                                                                                                                                                                                                                                                                                                                                                                                                                                                                                                                                                                                                                                                                                                                                                                                                                                                                                                                                                                                                                                                                                                                                                                                                                                                                                                                                                                                                                                                                                                                                                                                                                                                                                                                                                                                                                                                                                                                                                                                                                                                                                                                                                                                                                                                                                                                                                                                                                                                                                                                                                                                                                                                                                                                                                         | <p>Identifies, reflects upon, and learns from critical incidents such as near misses and preventable medical errors</p> <p>Recognizes health system factors that increase the risk for error, including medical device design, flawed processes, easily confused medications, barriers to optimal patient care, and competing interests of different stakeholders</p> <p>Describes the value and use of techniques and tools for preventing adverse events, including checklists, briefings, and structured communication and teamwork protocols</p> <p><i>Example:</i><br/>The physician<br/>1. Participates in quality improvement (M&amp;M) conferences<br/>2. Identifies medical errors that have occurred<br/>3. Describes key elements of a structured communication technique, such as Situation-Background-Assessment-Recommendation (SBAR)</p> | <p>Dialogues with care team members to identify risk for and prevention of medical errors</p> <p>Understands methods for analysis and correction of systems errors</p> <p>Applies structured communication techniques and tools, such as SBAR, during hand-offs and changes in patient condition</p> <p>Leads briefings and executes basic teamwork techniques designed to prevent adverse events (such as those in Crew Resource Management [CRM])</p> <p><i>Example:</i><br/>The physician<br/>1. Communicates systems errors via appropriate channels<br/>2. Demonstrates the ability to learn from medical errors that occur<br/>3. Partners and performs system improvement as a team member<br/>4. Performs CRM techniques such as "read back" of a critical laboratory result or a verbal order given to assure accurate communication ("closed loop")</p>                    | <p>Leads team analysis of the effectiveness of techniques applied to prevent errors</p> <p>Partners with other health care professionals to identify, propose, and implement improvement opportunities within the system</p> <p>Uses specialized principles and techniques to study potential sources and causes of errors</p> <p><i>Example:</i><br/>The physician<br/>1. Provides insight and guidance regarding quality improvement at conferences and in daily clinical work<br/>2. Suggests and designs a system improvement/solution<br/>3. Uses root cause analysis (RCA)</p> | <p>Develops and evaluates communication and teamwork techniques designed to prevent medical errors</p> <p>Uses advanced specialized techniques to study potential sources and causes of errors</p> <p>Coordinates and/or leads system quality improvement studies and implementation interventions</p> <p><i>Example:</i><br/>The physician;<br/>1. Uses failure mode effect analysis (FMEA) or human factors engineering principles (HFE)<br/>2. Consistently leads toward quality improvement at conferences and in daily clinical work<br/>3. Implements system improvement/solution</p> |         |         |  |                                                                                                                                                                                                                                                                                                                                                                                                                                          |                                                                                                                                                                                                                                                                                                                                                                                                                                                                                                                                                                                                                                                                                                                                                                                                                                                         |                                                                                                                                                                                                                                                                                                                                                                                                                                                                                                                                                                                                                                                                                                                                                                                                                                                                                      |                                                                                                                                                                                                                                                                                                                                                                                                                                                                                                                                                                                      |                                                                                                                                                                                                                                                                                                                                                                                                                                                                                                                                                                                             |                   |                                                                                                                                                                                                                                                                                                                                                                                                                                                                                                                                                                                                                                                                                                                                                                                                                                                                                                                                                                                                                                                                                                                                                                                                                                                                                                                                                                                                                                                                                                                                                                                                                                                                   |         |         |         |         |         |                                                                                                                                                                                                                                                                          |                                                                                                                                                                                                                                                                                    |                                                                                                                                                                                                                                                                                                                                     |                                                                                                                                                                                                                                                                      |                                                                                                                                                                                         |
| Level 1                                                                                                                                                                                                                                                                  | Level 2                                                                                                                                                                                                                                                                                                                                                                                                                                                                                                                                                                                                                                                                                                                                                                                                                                                                                                                                                                                                                                                                                                                                                                                                                                                                                                                                                                                                                                                                                                                                                                                                                                                                                                                                                                                                                                                                                                                                                                                                                                                                                                                                                                                                                                                                                                                                                                                                                                                                                                                                                                                                                                                                                                                                                                                                                                                                                                                                                                                                                                                                                                                                                                                                                                                                                                                                                                                                                                                                                                                                                                                                                                                                                                          | Level 3                                                                                                                                                                                                                                                                                                                                                                                                                                                                                                                                                                                                                                                                                                                                                                                                                                                 | Level 4                                                                                                                                                                                                                                                                                                                                                                                                                                                                                                                                                                                                                                                                                                                                                                                                                                                                              | Level 5                                                                                                                                                                                                                                                                                                                                                                                                                                                                                                                                                                              |                                                                                                                                                                                                                                                                                                                                                                                                                                                                                                                                                                                             |         |         |  |                                                                                                                                                                                                                                                                                                                                                                                                                                          |                                                                                                                                                                                                                                                                                                                                                                                                                                                                                                                                                                                                                                                                                                                                                                                                                                                         |                                                                                                                                                                                                                                                                                                                                                                                                                                                                                                                                                                                                                                                                                                                                                                                                                                                                                      |                                                                                                                                                                                                                                                                                                                                                                                                                                                                                                                                                                                      |                                                                                                                                                                                                                                                                                                                                                                                                                                                                                                                                                                                             |                   |                                                                                                                                                                                                                                                                                                                                                                                                                                                                                                                                                                                                                                                                                                                                                                                                                                                                                                                                                                                                                                                                                                                                                                                                                                                                                                                                                                                                                                                                                                                                                                                                                                                                   |         |         |         |         |         |                                                                                                                                                                                                                                                                          |                                                                                                                                                                                                                                                                                    |                                                                                                                                                                                                                                                                                                                                     |                                                                                                                                                                                                                                                                      |                                                                                                                                                                                         |
| <p>Identifies basic needs for effective transition to practice (e.g., information technology, legal, billing and coding, financial, personnel)</p> <p>Describes basic health payment systems (e.g., government, private, public, uninsured care) and practice models</p> | <p>Demonstrates use of information technology required for medical practice (e.g., electronic health record, documentation required for billing and coding)</p> <p>Describes how components of a complex health care system are interrelated and how this impacts patient care</p>                                                                                                                                                                                                                                                                                                                                                                                                                                                                                                                                                                                                                                                                                                                                                                                                                                                                                                                                                                                                                                                                                                                                                                                                                                                                                                                                                                                                                                                                                                                                                                                                                                                                                                                                                                                                                                                                                                                                                                                                                                                                                                                                                                                                                                                                                                                                                                                                                                                                                                                                                                                                                                                                                                                                                                                                                                                                                                                                                                                                                                                                                                                                                                                                                                                                                                                                                                                                                               | <p>Describes core administrative knowledge needed for transition to independent practice (e.g., contract negotiations, malpractice insurance, government regulation, compliance)</p> <p>Discusses how individual practice affects the broader system performance (e.g., length of stay, readmission rates, clinical efficiency)</p>                                                                                                                                                                                                                                                                                                                                                                                                                                                                                                                     | <p>Analyzes individual practice patterns and professional requirements in preparation for practice</p> <p>Manages various components of the complex health care system to provide efficient and effective patient care (e.g., patient payment models, insurance)</p>                                                                                                                                                                                                                                                                                                                                                                                                                                                                                                                                                                                                                 | <p>Educates others to prepare them for transition to practice</p> <p>Advocates for or leads systems change that enhances high-value, efficient, and effective patient care</p>                                                                                                                                                                                                                                                                                                                                                                                                       |                                                                                                                                                                                                                                                                                                                                                                                                                                                                                                                                                                                             |         |         |  |                                                                                                                                                                                                                                                                                                                                                                                                                                          |                                                                                                                                                                                                                                                                                                                                                                                                                                                                                                                                                                                                                                                                                                                                                                                                                                                         |                                                                                                                                                                                                                                                                                                                                                                                                                                                                                                                                                                                                                                                                                                                                                                                                                                                                                      |                                                                                                                                                                                                                                                                                                                                                                                                                                                                                                                                                                                      |                                                                                                                                                                                                                                                                                                                                                                                                                                                                                                                                                                                             |                   |                                                                                                                                                                                                                                                                                                                                                                                                                                                                                                                                                                                                                                                                                                                                                                                                                                                                                                                                                                                                                                                                                                                                                                                                                                                                                                                                                                                                                                                                                                                                                                                                                                                                   |         |         |         |         |         |                                                                                                                                                                                                                                                                          |                                                                                                                                                                                                                                                                                    |                                                                                                                                                                                                                                                                                                                                     |                                                                                                                                                                                                                                                                      |                                                                                                                                                                                         |

| <p><b>Urology</b></p>                                                                                                                                                                           | <p>Infor-<br/>matics</p>                                                                                                                                                                                                                                                                    | <p><b>SBP4. Uses technology to accomplish safe health care delivery.</b></p> <table border="1"> <thead> <tr> <th>Has not achieved Level 1</th> <th>Level 1</th> <th>Level 2</th> <th>Level 3</th> <th>Level 4</th> <th>Level 5</th> </tr> </thead> <tbody> <tr> <td></td> <td> <p>Explains the role of the Electronic Health Record (EHR) and Computerized Physician Order Entry (CPOE) in prevention of medical errors</p> <p><i>Example:</i><br/>The physician<br/>1. Can use the EHR and CPOE to enter clinical information and basic orders</p> </td> <td> <p>As is applicable in the institution, utilizes the EHR to order tests, medications, and document notes, and responds to alerts</p> <p>Recognizes the risks and limitations added by EHRs</p> <p><i>Example:</i><br/>The physician<br/>1. Competently uses the EHR and CPOE on a daily basis for patient care activities<br/>2. Demonstrates efficiency in accomplishing repeated tasks (such as creating automated rounding lists or order sets)<br/>3. Understands the risk of using defaults and cut and paste strategies to create notes</p> </td> <td> <p>Efficiently uses information systems for patient care, including literature review (see also Practice-based Learning and Improvement [PBLI])</p> <p>Demonstrates medication reconciliation for patients using a variety of strategies</p> <p>Consistently demonstrates safe practices to minimize risks and limitations added by EHRs</p> <p><i>Example:</i><br/>The physician<br/>1. Efficiently uses the EHR and CPOE for patient care activities<br/>2. Performs medication reconciliation with attention to details from the present clinical course that may lead to changes (such as when to resume medications that have been stopped for surgery)<br/>3. Never uses copy/paste strategies without relevant revision</p> </td> <td> <p>Contributes to reduction of risks of automation and computerized systems by reporting system problems</p> <p>Uses decision support systems in EHR (as applicable in the institution)</p> <p>Critiques decision support systems</p> <p><i>Example:</i><br/>The physician<br/>1. Capably uses the EHR and CPOE to care for patients and communicate essential information with other members of the health care team<br/>2. Identifies flaws in decision support systems, automated care pathways, or system alerts</p> </td> <td> <p>Judges safety of computer and device interfaces using heuristics</p> <p>Recommends systems re-design for faculty computerized processes</p> <p><i>Example:</i><br/>The physician<br/>1. Demonstrates familiarity with multiple systems, including relative strengths of each<br/>2. Communicates with information technology personnel to improve systems, such as automated alerts for critical lab values, forwarding communication to PCP</p> </td> </tr> </tbody> </table> | Has not achieved Level 1                                                                                                                                                                                                                                                                                                                                                                                                                                                                                                                                                                                                                                                                                                           | Level 1                                                                                                                                                                                                                                                                                                                                                                                                                                                                                                                  | Level 2                                                                                                                                                                                                                                                                                                                                                                                                                                             | Level 3 | Level 4 | Level 5                                                                                                                                                                                         |                                                                                                                                                                                                                                                                                             | <p>Explains the role of the Electronic Health Record (EHR) and Computerized Physician Order Entry (CPOE) in prevention of medical errors</p> <p><i>Example:</i><br/>The physician<br/>1. Can use the EHR and CPOE to enter clinical information and basic orders</p> | <p>As is applicable in the institution, utilizes the EHR to order tests, medications, and document notes, and responds to alerts</p> <p>Recognizes the risks and limitations added by EHRs</p> <p><i>Example:</i><br/>The physician<br/>1. Competently uses the EHR and CPOE on a daily basis for patient care activities<br/>2. Demonstrates efficiency in accomplishing repeated tasks (such as creating automated rounding lists or order sets)<br/>3. Understands the risk of using defaults and cut and paste strategies to create notes</p> | <p>Efficiently uses information systems for patient care, including literature review (see also Practice-based Learning and Improvement [PBLI])</p> <p>Demonstrates medication reconciliation for patients using a variety of strategies</p> <p>Consistently demonstrates safe practices to minimize risks and limitations added by EHRs</p> <p><i>Example:</i><br/>The physician<br/>1. Efficiently uses the EHR and CPOE for patient care activities<br/>2. Performs medication reconciliation with attention to details from the present clinical course that may lead to changes (such as when to resume medications that have been stopped for surgery)<br/>3. Never uses copy/paste strategies without relevant revision</p> | <p>Contributes to reduction of risks of automation and computerized systems by reporting system problems</p> <p>Uses decision support systems in EHR (as applicable in the institution)</p> <p>Critiques decision support systems</p> <p><i>Example:</i><br/>The physician<br/>1. Capably uses the EHR and CPOE to care for patients and communicate essential information with other members of the health care team<br/>2. Identifies flaws in decision support systems, automated care pathways, or system alerts</p> | <p>Judges safety of computer and device interfaces using heuristics</p> <p>Recommends systems re-design for faculty computerized processes</p> <p><i>Example:</i><br/>The physician<br/>1. Demonstrates familiarity with multiple systems, including relative strengths of each<br/>2. Communicates with information technology personnel to improve systems, such as automated alerts for critical lab values, forwarding communication to PCP</p> |  |  |
|-------------------------------------------------------------------------------------------------------------------------------------------------------------------------------------------------|---------------------------------------------------------------------------------------------------------------------------------------------------------------------------------------------------------------------------------------------------------------------------------------------|-------------------------------------------------------------------------------------------------------------------------------------------------------------------------------------------------------------------------------------------------------------------------------------------------------------------------------------------------------------------------------------------------------------------------------------------------------------------------------------------------------------------------------------------------------------------------------------------------------------------------------------------------------------------------------------------------------------------------------------------------------------------------------------------------------------------------------------------------------------------------------------------------------------------------------------------------------------------------------------------------------------------------------------------------------------------------------------------------------------------------------------------------------------------------------------------------------------------------------------------------------------------------------------------------------------------------------------------------------------------------------------------------------------------------------------------------------------------------------------------------------------------------------------------------------------------------------------------------------------------------------------------------------------------------------------------------------------------------------------------------------------------------------------------------------------------------------------------------------------------------------------------------------------------------------------------------------------------------------------------------------------------------------------------------------------------------------------------------------------------------------------------------------------------------------------------------------------------------------------------------------------------------------------------------------------------------------------------------------------------------------------------------------------------------------------------------------------------------------------------------------------------------------------------------------------------------------------------------------------------------------------------------------------------------------------------------------------------------------------------------------------------------------------------------------------------------------------------------------------------------------------------------|------------------------------------------------------------------------------------------------------------------------------------------------------------------------------------------------------------------------------------------------------------------------------------------------------------------------------------------------------------------------------------------------------------------------------------------------------------------------------------------------------------------------------------------------------------------------------------------------------------------------------------------------------------------------------------------------------------------------------------|--------------------------------------------------------------------------------------------------------------------------------------------------------------------------------------------------------------------------------------------------------------------------------------------------------------------------------------------------------------------------------------------------------------------------------------------------------------------------------------------------------------------------|-----------------------------------------------------------------------------------------------------------------------------------------------------------------------------------------------------------------------------------------------------------------------------------------------------------------------------------------------------------------------------------------------------------------------------------------------------|---------|---------|-------------------------------------------------------------------------------------------------------------------------------------------------------------------------------------------------|---------------------------------------------------------------------------------------------------------------------------------------------------------------------------------------------------------------------------------------------------------------------------------------------|----------------------------------------------------------------------------------------------------------------------------------------------------------------------------------------------------------------------------------------------------------------------|---------------------------------------------------------------------------------------------------------------------------------------------------------------------------------------------------------------------------------------------------------------------------------------------------------------------------------------------------------------------------------------------------------------------------------------------------------------------------------------------------------------------------------------------------|------------------------------------------------------------------------------------------------------------------------------------------------------------------------------------------------------------------------------------------------------------------------------------------------------------------------------------------------------------------------------------------------------------------------------------------------------------------------------------------------------------------------------------------------------------------------------------------------------------------------------------------------------------------------------------------------------------------------------------|--------------------------------------------------------------------------------------------------------------------------------------------------------------------------------------------------------------------------------------------------------------------------------------------------------------------------------------------------------------------------------------------------------------------------------------------------------------------------------------------------------------------------|-----------------------------------------------------------------------------------------------------------------------------------------------------------------------------------------------------------------------------------------------------------------------------------------------------------------------------------------------------------------------------------------------------------------------------------------------------|--|--|
| Has not achieved Level 1                                                                                                                                                                        | Level 1                                                                                                                                                                                                                                                                                     | Level 2                                                                                                                                                                                                                                                                                                                                                                                                                                                                                                                                                                                                                                                                                                                                                                                                                                                                                                                                                                                                                                                                                                                                                                                                                                                                                                                                                                                                                                                                                                                                                                                                                                                                                                                                                                                                                                                                                                                                                                                                                                                                                                                                                                                                                                                                                                                                                                                                                                                                                                                                                                                                                                                                                                                                                                                                                                                                                         | Level 3                                                                                                                                                                                                                                                                                                                                                                                                                                                                                                                                                                                                                                                                                                                            | Level 4                                                                                                                                                                                                                                                                                                                                                                                                                                                                                                                  | Level 5                                                                                                                                                                                                                                                                                                                                                                                                                                             |         |         |                                                                                                                                                                                                 |                                                                                                                                                                                                                                                                                             |                                                                                                                                                                                                                                                                      |                                                                                                                                                                                                                                                                                                                                                                                                                                                                                                                                                   |                                                                                                                                                                                                                                                                                                                                                                                                                                                                                                                                                                                                                                                                                                                                    |                                                                                                                                                                                                                                                                                                                                                                                                                                                                                                                          |                                                                                                                                                                                                                                                                                                                                                                                                                                                     |  |  |
|                                                                                                                                                                                                 | <p>Explains the role of the Electronic Health Record (EHR) and Computerized Physician Order Entry (CPOE) in prevention of medical errors</p> <p><i>Example:</i><br/>The physician<br/>1. Can use the EHR and CPOE to enter clinical information and basic orders</p>                        | <p>As is applicable in the institution, utilizes the EHR to order tests, medications, and document notes, and responds to alerts</p> <p>Recognizes the risks and limitations added by EHRs</p> <p><i>Example:</i><br/>The physician<br/>1. Competently uses the EHR and CPOE on a daily basis for patient care activities<br/>2. Demonstrates efficiency in accomplishing repeated tasks (such as creating automated rounding lists or order sets)<br/>3. Understands the risk of using defaults and cut and paste strategies to create notes</p>                                                                                                                                                                                                                                                                                                                                                                                                                                                                                                                                                                                                                                                                                                                                                                                                                                                                                                                                                                                                                                                                                                                                                                                                                                                                                                                                                                                                                                                                                                                                                                                                                                                                                                                                                                                                                                                                                                                                                                                                                                                                                                                                                                                                                                                                                                                                               | <p>Efficiently uses information systems for patient care, including literature review (see also Practice-based Learning and Improvement [PBLI])</p> <p>Demonstrates medication reconciliation for patients using a variety of strategies</p> <p>Consistently demonstrates safe practices to minimize risks and limitations added by EHRs</p> <p><i>Example:</i><br/>The physician<br/>1. Efficiently uses the EHR and CPOE for patient care activities<br/>2. Performs medication reconciliation with attention to details from the present clinical course that may lead to changes (such as when to resume medications that have been stopped for surgery)<br/>3. Never uses copy/paste strategies without relevant revision</p> | <p>Contributes to reduction of risks of automation and computerized systems by reporting system problems</p> <p>Uses decision support systems in EHR (as applicable in the institution)</p> <p>Critiques decision support systems</p> <p><i>Example:</i><br/>The physician<br/>1. Capably uses the EHR and CPOE to care for patients and communicate essential information with other members of the health care team<br/>2. Identifies flaws in decision support systems, automated care pathways, or system alerts</p> | <p>Judges safety of computer and device interfaces using heuristics</p> <p>Recommends systems re-design for faculty computerized processes</p> <p><i>Example:</i><br/>The physician<br/>1. Demonstrates familiarity with multiple systems, including relative strengths of each<br/>2. Communicates with information technology personnel to improve systems, such as automated alerts for critical lab values, forwarding communication to PCP</p> |         |         |                                                                                                                                                                                                 |                                                                                                                                                                                                                                                                                             |                                                                                                                                                                                                                                                                      |                                                                                                                                                                                                                                                                                                                                                                                                                                                                                                                                                   |                                                                                                                                                                                                                                                                                                                                                                                                                                                                                                                                                                                                                                                                                                                                    |                                                                                                                                                                                                                                                                                                                                                                                                                                                                                                                          |                                                                                                                                                                                                                                                                                                                                                                                                                                                     |  |  |
| <p><b>Vascular Surgery</b></p>                                                                                                                                                                  | <p>PS</p>                                                                                                                                                                                                                                                                                   | <p><b>SBP1: Radiation Safety</b></p> <table border="1"> <thead> <tr> <th>Level 1</th> <th>Level 2</th> <th>Level 3</th> <th>Level 4</th> <th>Level 5</th> </tr> </thead> <tbody> <tr> <td> <p>Describes the mechanisms of and risks for radiation injury</p> <p>Describes the ALARA principle</p> <p>With supervision, applies basic radiation protection and monitoring concepts</p> </td> <td> <p>Identifies signs of radiation injury</p> <p>Communicates the relative risk of exam-specific radiation exposure to patients</p> <p>Requires supervision when employing ALARA principles to minimize radiation exposure to the patient, self, and staff while optimizing image quality</p> </td> <td> <p>With limited supervision, consistently employs ALARA principles to minimize radiation exposure to the patient, self, and staff while optimizing image quality</p> </td> <td> <p>Consistently and independently employs ALARA principles to minimize radiation exposure to the patient, self, and staff while optimizing image quality</p> </td> <td> <p>Performs root-cause analysis for recordable or reportable events</p> <p>Develops methodologies to further decrease radiation exposure</p> </td> </tr> </tbody> </table>                                                                                                                                                                                                                                                                                                                                                                                                                                                                                                                                                                                                                                                                                                                                                                                                                                                                                                                                                                                                                                                                                                                                                                                                                                                                                                                                                                                                                                                                                                                                                                                                                                                      | Level 1                                                                                                                                                                                                                                                                                                                                                                                                                                                                                                                                                                                                                                                                                                                            | Level 2                                                                                                                                                                                                                                                                                                                                                                                                                                                                                                                  | Level 3                                                                                                                                                                                                                                                                                                                                                                                                                                             | Level 4 | Level 5 | <p>Describes the mechanisms of and risks for radiation injury</p> <p>Describes the ALARA principle</p> <p>With supervision, applies basic radiation protection and monitoring concepts</p>      | <p>Identifies signs of radiation injury</p> <p>Communicates the relative risk of exam-specific radiation exposure to patients</p> <p>Requires supervision when employing ALARA principles to minimize radiation exposure to the patient, self, and staff while optimizing image quality</p> | <p>With limited supervision, consistently employs ALARA principles to minimize radiation exposure to the patient, self, and staff while optimizing image quality</p>                                                                                                 | <p>Consistently and independently employs ALARA principles to minimize radiation exposure to the patient, self, and staff while optimizing image quality</p>                                                                                                                                                                                                                                                                                                                                                                                      | <p>Performs root-cause analysis for recordable or reportable events</p> <p>Develops methodologies to further decrease radiation exposure</p>                                                                                                                                                                                                                                                                                                                                                                                                                                                                                                                                                                                       |                                                                                                                                                                                                                                                                                                                                                                                                                                                                                                                          |                                                                                                                                                                                                                                                                                                                                                                                                                                                     |  |  |
| Level 1                                                                                                                                                                                         | Level 2                                                                                                                                                                                                                                                                                     | Level 3                                                                                                                                                                                                                                                                                                                                                                                                                                                                                                                                                                                                                                                                                                                                                                                                                                                                                                                                                                                                                                                                                                                                                                                                                                                                                                                                                                                                                                                                                                                                                                                                                                                                                                                                                                                                                                                                                                                                                                                                                                                                                                                                                                                                                                                                                                                                                                                                                                                                                                                                                                                                                                                                                                                                                                                                                                                                                         | Level 4                                                                                                                                                                                                                                                                                                                                                                                                                                                                                                                                                                                                                                                                                                                            | Level 5                                                                                                                                                                                                                                                                                                                                                                                                                                                                                                                  |                                                                                                                                                                                                                                                                                                                                                                                                                                                     |         |         |                                                                                                                                                                                                 |                                                                                                                                                                                                                                                                                             |                                                                                                                                                                                                                                                                      |                                                                                                                                                                                                                                                                                                                                                                                                                                                                                                                                                   |                                                                                                                                                                                                                                                                                                                                                                                                                                                                                                                                                                                                                                                                                                                                    |                                                                                                                                                                                                                                                                                                                                                                                                                                                                                                                          |                                                                                                                                                                                                                                                                                                                                                                                                                                                     |  |  |
| <p>Describes the mechanisms of and risks for radiation injury</p> <p>Describes the ALARA principle</p> <p>With supervision, applies basic radiation protection and monitoring concepts</p>      | <p>Identifies signs of radiation injury</p> <p>Communicates the relative risk of exam-specific radiation exposure to patients</p> <p>Requires supervision when employing ALARA principles to minimize radiation exposure to the patient, self, and staff while optimizing image quality</p> | <p>With limited supervision, consistently employs ALARA principles to minimize radiation exposure to the patient, self, and staff while optimizing image quality</p>                                                                                                                                                                                                                                                                                                                                                                                                                                                                                                                                                                                                                                                                                                                                                                                                                                                                                                                                                                                                                                                                                                                                                                                                                                                                                                                                                                                                                                                                                                                                                                                                                                                                                                                                                                                                                                                                                                                                                                                                                                                                                                                                                                                                                                                                                                                                                                                                                                                                                                                                                                                                                                                                                                                            | <p>Consistently and independently employs ALARA principles to minimize radiation exposure to the patient, self, and staff while optimizing image quality</p>                                                                                                                                                                                                                                                                                                                                                                                                                                                                                                                                                                       | <p>Performs root-cause analysis for recordable or reportable events</p> <p>Develops methodologies to further decrease radiation exposure</p>                                                                                                                                                                                                                                                                                                                                                                             |                                                                                                                                                                                                                                                                                                                                                                                                                                                     |         |         |                                                                                                                                                                                                 |                                                                                                                                                                                                                                                                                             |                                                                                                                                                                                                                                                                      |                                                                                                                                                                                                                                                                                                                                                                                                                                                                                                                                                   |                                                                                                                                                                                                                                                                                                                                                                                                                                                                                                                                                                                                                                                                                                                                    |                                                                                                                                                                                                                                                                                                                                                                                                                                                                                                                          |                                                                                                                                                                                                                                                                                                                                                                                                                                                     |  |  |
| <p><b>Vascular Surgery</b></p>                                                                                                                                                                  | <p>CC</p>                                                                                                                                                                                                                                                                                   | <p><b>SBP2: Coordination of Care</b></p> <table border="1"> <thead> <tr> <th>Level 1</th> <th>Level 2</th> <th>Level 3</th> <th>Level 4</th> <th>Level 5</th> </tr> </thead> <tbody> <tr> <td> <p>Demonstrates a basic understanding of the resources available for coordinating patient care, including social workers, visiting nurses, and physical and occupational therapists</p> </td> <td> <p>Knows the necessary resources to provide optimal coordination of care and how to access them</p> <p>Demonstrates awareness of specialized services</p> </td> <td> <p>Efficiently and responsibly arranges patient disposition planning in preparing all materials necessary for discharge or transfer of their patients</p> </td> <td> <p>Coordinates the activities of residents, nurses, social workers, and other health care professionals to provide optimal care to the patient at the time of discharge or transfer, and to provide post-discharge ambulatory care that is appropriate for the patient's particular needs</p> </td> <td> <p>Completes a performance improvement project for coordination of care</p> </td> </tr> </tbody> </table>                                                                                                                                                                                                                                                                                                                                                                                                                                                                                                                                                                                                                                                                                                                                                                                                                                                                                                                                                                                                                                                                                                                                                                                                                                                                                                                                                                                                                                                                                                                                                                                                                                                                                                                                  | Level 1                                                                                                                                                                                                                                                                                                                                                                                                                                                                                                                                                                                                                                                                                                                            | Level 2                                                                                                                                                                                                                                                                                                                                                                                                                                                                                                                  | Level 3                                                                                                                                                                                                                                                                                                                                                                                                                                             | Level 4 | Level 5 | <p>Demonstrates a basic understanding of the resources available for coordinating patient care, including social workers, visiting nurses, and physical and occupational therapists</p>         | <p>Knows the necessary resources to provide optimal coordination of care and how to access them</p> <p>Demonstrates awareness of specialized services</p>                                                                                                                                   | <p>Efficiently and responsibly arranges patient disposition planning in preparing all materials necessary for discharge or transfer of their patients</p>                                                                                                            | <p>Coordinates the activities of residents, nurses, social workers, and other health care professionals to provide optimal care to the patient at the time of discharge or transfer, and to provide post-discharge ambulatory care that is appropriate for the patient's particular needs</p>                                                                                                                                                                                                                                                     | <p>Completes a performance improvement project for coordination of care</p>                                                                                                                                                                                                                                                                                                                                                                                                                                                                                                                                                                                                                                                        |                                                                                                                                                                                                                                                                                                                                                                                                                                                                                                                          |                                                                                                                                                                                                                                                                                                                                                                                                                                                     |  |  |
| Level 1                                                                                                                                                                                         | Level 2                                                                                                                                                                                                                                                                                     | Level 3                                                                                                                                                                                                                                                                                                                                                                                                                                                                                                                                                                                                                                                                                                                                                                                                                                                                                                                                                                                                                                                                                                                                                                                                                                                                                                                                                                                                                                                                                                                                                                                                                                                                                                                                                                                                                                                                                                                                                                                                                                                                                                                                                                                                                                                                                                                                                                                                                                                                                                                                                                                                                                                                                                                                                                                                                                                                                         | Level 4                                                                                                                                                                                                                                                                                                                                                                                                                                                                                                                                                                                                                                                                                                                            | Level 5                                                                                                                                                                                                                                                                                                                                                                                                                                                                                                                  |                                                                                                                                                                                                                                                                                                                                                                                                                                                     |         |         |                                                                                                                                                                                                 |                                                                                                                                                                                                                                                                                             |                                                                                                                                                                                                                                                                      |                                                                                                                                                                                                                                                                                                                                                                                                                                                                                                                                                   |                                                                                                                                                                                                                                                                                                                                                                                                                                                                                                                                                                                                                                                                                                                                    |                                                                                                                                                                                                                                                                                                                                                                                                                                                                                                                          |                                                                                                                                                                                                                                                                                                                                                                                                                                                     |  |  |
| <p>Demonstrates a basic understanding of the resources available for coordinating patient care, including social workers, visiting nurses, and physical and occupational therapists</p>         | <p>Knows the necessary resources to provide optimal coordination of care and how to access them</p> <p>Demonstrates awareness of specialized services</p>                                                                                                                                   | <p>Efficiently and responsibly arranges patient disposition planning in preparing all materials necessary for discharge or transfer of their patients</p>                                                                                                                                                                                                                                                                                                                                                                                                                                                                                                                                                                                                                                                                                                                                                                                                                                                                                                                                                                                                                                                                                                                                                                                                                                                                                                                                                                                                                                                                                                                                                                                                                                                                                                                                                                                                                                                                                                                                                                                                                                                                                                                                                                                                                                                                                                                                                                                                                                                                                                                                                                                                                                                                                                                                       | <p>Coordinates the activities of residents, nurses, social workers, and other health care professionals to provide optimal care to the patient at the time of discharge or transfer, and to provide post-discharge ambulatory care that is appropriate for the patient's particular needs</p>                                                                                                                                                                                                                                                                                                                                                                                                                                      | <p>Completes a performance improvement project for coordination of care</p>                                                                                                                                                                                                                                                                                                                                                                                                                                              |                                                                                                                                                                                                                                                                                                                                                                                                                                                     |         |         |                                                                                                                                                                                                 |                                                                                                                                                                                                                                                                                             |                                                                                                                                                                                                                                                                      |                                                                                                                                                                                                                                                                                                                                                                                                                                                                                                                                                   |                                                                                                                                                                                                                                                                                                                                                                                                                                                                                                                                                                                                                                                                                                                                    |                                                                                                                                                                                                                                                                                                                                                                                                                                                                                                                          |                                                                                                                                                                                                                                                                                                                                                                                                                                                     |  |  |
| <p><b>Vascular Surgery</b></p>                                                                                                                                                                  | <p>QI<br/>PS</p>                                                                                                                                                                                                                                                                            | <p><b>SBP3: Improvement of Care</b></p> <table border="1"> <thead> <tr> <th>Level 1</th> <th>Level 2</th> <th>Level 3</th> <th>Level 4</th> <th>Level 5</th> </tr> </thead> <tbody> <tr> <td> <p>Demonstrates basic knowledge of how health systems operate</p> <p>Demonstrates knowledge of system factors that contribute to medical errors, and is aware that variations in care occur</p> </td> <td> <p>Describes how patient care is provided in the system, and recognizes specific system failures that can affect patient care</p> <p>Follows protocols and guidelines for patient care</p> </td> <td> <p>Suggests changes in the health care system that may improve patient care</p> <p>Reports problems with technology (e.g., devices and automated systems) or processes that could produce medical errors</p> </td> <td> <p>Participates in work groups or performance improvement teams designed to reduce errors and improve health outcomes</p> <p>Demonstrates understanding of the appropriate use of standardized approaches to care, and participates in creating such protocols of care</p> </td> <td> <p>Functions as a team leader for work groups or performance improvement teams designed to reduce errors and improve health outcomes</p> </td> </tr> </tbody> </table>                                                                                                                                                                                                                                                                                                                                                                                                                                                                                                                                                                                                                                                                                                                                                                                                                                                                                                                                                                                                                                                                                                                                                                                                                                                                                                                                                                                                                                                                                                                                                                                             | Level 1                                                                                                                                                                                                                                                                                                                                                                                                                                                                                                                                                                                                                                                                                                                            | Level 2                                                                                                                                                                                                                                                                                                                                                                                                                                                                                                                  | Level 3                                                                                                                                                                                                                                                                                                                                                                                                                                             | Level 4 | Level 5 | <p>Demonstrates basic knowledge of how health systems operate</p> <p>Demonstrates knowledge of system factors that contribute to medical errors, and is aware that variations in care occur</p> | <p>Describes how patient care is provided in the system, and recognizes specific system failures that can affect patient care</p> <p>Follows protocols and guidelines for patient care</p>                                                                                                  | <p>Suggests changes in the health care system that may improve patient care</p> <p>Reports problems with technology (e.g., devices and automated systems) or processes that could produce medical errors</p>                                                         | <p>Participates in work groups or performance improvement teams designed to reduce errors and improve health outcomes</p> <p>Demonstrates understanding of the appropriate use of standardized approaches to care, and participates in creating such protocols of care</p>                                                                                                                                                                                                                                                                        | <p>Functions as a team leader for work groups or performance improvement teams designed to reduce errors and improve health outcomes</p>                                                                                                                                                                                                                                                                                                                                                                                                                                                                                                                                                                                           |                                                                                                                                                                                                                                                                                                                                                                                                                                                                                                                          |                                                                                                                                                                                                                                                                                                                                                                                                                                                     |  |  |
| Level 1                                                                                                                                                                                         | Level 2                                                                                                                                                                                                                                                                                     | Level 3                                                                                                                                                                                                                                                                                                                                                                                                                                                                                                                                                                                                                                                                                                                                                                                                                                                                                                                                                                                                                                                                                                                                                                                                                                                                                                                                                                                                                                                                                                                                                                                                                                                                                                                                                                                                                                                                                                                                                                                                                                                                                                                                                                                                                                                                                                                                                                                                                                                                                                                                                                                                                                                                                                                                                                                                                                                                                         | Level 4                                                                                                                                                                                                                                                                                                                                                                                                                                                                                                                                                                                                                                                                                                                            | Level 5                                                                                                                                                                                                                                                                                                                                                                                                                                                                                                                  |                                                                                                                                                                                                                                                                                                                                                                                                                                                     |         |         |                                                                                                                                                                                                 |                                                                                                                                                                                                                                                                                             |                                                                                                                                                                                                                                                                      |                                                                                                                                                                                                                                                                                                                                                                                                                                                                                                                                                   |                                                                                                                                                                                                                                                                                                                                                                                                                                                                                                                                                                                                                                                                                                                                    |                                                                                                                                                                                                                                                                                                                                                                                                                                                                                                                          |                                                                                                                                                                                                                                                                                                                                                                                                                                                     |  |  |
| <p>Demonstrates basic knowledge of how health systems operate</p> <p>Demonstrates knowledge of system factors that contribute to medical errors, and is aware that variations in care occur</p> | <p>Describes how patient care is provided in the system, and recognizes specific system failures that can affect patient care</p> <p>Follows protocols and guidelines for patient care</p>                                                                                                  | <p>Suggests changes in the health care system that may improve patient care</p> <p>Reports problems with technology (e.g., devices and automated systems) or processes that could produce medical errors</p>                                                                                                                                                                                                                                                                                                                                                                                                                                                                                                                                                                                                                                                                                                                                                                                                                                                                                                                                                                                                                                                                                                                                                                                                                                                                                                                                                                                                                                                                                                                                                                                                                                                                                                                                                                                                                                                                                                                                                                                                                                                                                                                                                                                                                                                                                                                                                                                                                                                                                                                                                                                                                                                                                    | <p>Participates in work groups or performance improvement teams designed to reduce errors and improve health outcomes</p> <p>Demonstrates understanding of the appropriate use of standardized approaches to care, and participates in creating such protocols of care</p>                                                                                                                                                                                                                                                                                                                                                                                                                                                         | <p>Functions as a team leader for work groups or performance improvement teams designed to reduce errors and improve health outcomes</p>                                                                                                                                                                                                                                                                                                                                                                                 |                                                                                                                                                                                                                                                                                                                                                                                                                                                     |         |         |                                                                                                                                                                                                 |                                                                                                                                                                                                                                                                                             |                                                                                                                                                                                                                                                                      |                                                                                                                                                                                                                                                                                                                                                                                                                                                                                                                                                   |                                                                                                                                                                                                                                                                                                                                                                                                                                                                                                                                                                                                                                                                                                                                    |                                                                                                                                                                                                                                                                                                                                                                                                                                                                                                                          |                                                                                                                                                                                                                                                                                                                                                                                                                                                     |  |  |

Abbreviations:

PS- Patient Safety, QI- Quality Improvement, CC- Care Coordination, HC- Healthcare

**Residency Education in Systems-Based Practice - Literature 2008-2020**

|   |                                                                                                                                                                                                                                                                                                                   | Mapping to Milestones | Feedback | Learner Assessment | Program Improvement | System Change | Clinical Competency Committee Function (CCC) | Curriculum | Systems Thinking | SBP1: PS/QI | SBP2: System Navigation for Pt Centered Care | SBP3: Physician Role in Health Care Systems |
|---|-------------------------------------------------------------------------------------------------------------------------------------------------------------------------------------------------------------------------------------------------------------------------------------------------------------------|-----------------------|----------|--------------------|---------------------|---------------|----------------------------------------------|------------|------------------|-------------|----------------------------------------------|---------------------------------------------|
| 1 | Purnell SM, Wolf L, Millar MM, Smith BK. A National Survey of Integrated Vascular Surgery Residents' Experiences With and Attitudes About Quality Improvement During Residency. <i>J Surg Educ</i> . 2020;77(1):158-165. doi:10.1016/j.jsurg.2019.09.003                                                          |                       |          |                    | Program Improvement |               |                                              |            |                  | SBP1        |                                              |                                             |
| 2 | Kelleher M, Kinnear B, Wong SEP, O'Toole J, Warm E. Linking Workplace-Based Assessment to ACGME Milestones: A Comparison of Mapping Strategies in Two Specialties. <i>Teach Learn Med</i> . 2020;32(2):194-203. doi:10.1080/10401334.2019.1653764                                                                 | Mapping               |          |                    |                     |               |                                              |            |                  |             |                                              |                                             |
| 3 | Nahmias J, Smith B, Grigorian A, et al. Implementation of a High-Value Care Curriculum for General Surgery Residents [published online ahead of print, 2020 Mar 31]. <i>J Surg Educ</i> . 2020;S1931-7204(20)30072-6. doi:10.1016/j.jsurg.2020.03.006                                                             |                       |          |                    |                     |               |                                              | Curriculum |                  | SBP1        |                                              |                                             |
| 4 | Dolansky MA, Moore SM, Palmieri PA, Singh MK. Development and Validation of the Systems Thinking Scale. <i>J Gen Intern Med</i> . 2020 Aug;35(8):2314-2320. doi: 10.1007/s11606-020-05830-1. Epub 2020 Apr 27. PMID: 32342481; PMCID: PMC7403244.                                                                 |                       |          | Learner Assessment |                     |               |                                              |            | Systems Thinking | SBP1        | SBP2                                         | SBP3                                        |
| 5 | Orsino A, Ng S. Can adaptive expertise, reflective practice, and activity theory help achieve systems-based practice and collective competence?. <i>Can Med Educ J</i> . 2019;10(3):e55-e60. Published 2019 Jul 24.                                                                                               |                       |          |                    |                     |               |                                              | Curriculum |                  |             |                                              |                                             |
| 6 | Samala RV, Hoeksema LJ, Colbert CY. A Qualitative Study of Independent Home Visits by Hospice Fellows: Addressing Gaps in ACGME Milestones by Fostering Reflection and Self-Assessment. <i>Am J Hosp Palliat Care</i> . 2019 Oct;36(10):885-892. doi: 10.1177/1049909119836218. Epub 2019 Mar 13. PMID: 30866641. |                       |          | Learner Assessment |                     |               |                                              | Curriculum |                  |             | SBP2                                         | SBP3                                        |

|    |                                                                                                                                                                                                                                                                                                                                        |         |          |                    |                     |                |     |            |  |      |  |  |      |
|----|----------------------------------------------------------------------------------------------------------------------------------------------------------------------------------------------------------------------------------------------------------------------------------------------------------------------------------------|---------|----------|--------------------|---------------------|----------------|-----|------------|--|------|--|--|------|
| 7  | Lloyd RB, Park YS, Tekian A, Marvin R. Understanding Assessment Systems for Clinical Competency Committee Decisions: Evidence from a Multisite Study of Psychiatry Residency Training Programs [published online ahead of print, 2019 Dec 23]. <i>Acad Psychiatry.</i> 2019;10.1007/s40596-019-01168-x. doi:10.1007/s40596-019-01168-x | Mapping |          |                    |                     |                | CCC |            |  |      |  |  |      |
| 8  | Srikumaran D, Tian J, Ramulu P, et al. Ability of Ophthalmology Residents to Self-Assess Their Performance Through Established Milestones. <i>J Surg Educ.</i> 2019;76(4):1076-1087. doi:10.1016/j.jsurg.2018.12.004                                                                                                                   |         | Feedback |                    |                     |                |     |            |  |      |  |  |      |
| 9  | Lloyd RB, Park YS, Tekian A, Marvin R. Understanding Assessment Systems for Clinical Competency Committee Decisions: Evidence from a Multisite Study of Psychiatry Residency Training Programs [published online ahead of print, 2019 Dec 23]. <i>Acad Psychiatry.</i> 2019; doi:10.1007/s40596-019-0201168-x                          |         |          |                    |                     |                | CCC |            |  |      |  |  |      |
| 10 | Rutz M, Turner J, Pettit K, Palmer MM, Perkins A, Cooper DD. Factors that Contribute to Resident Teaching Effectiveness. <i>Cureus.</i> 2019;11(3):e4290. Published 2019 Mar 21. doi:10.7759/cureus.4290                                                                                                                               |         |          |                    | Program Improvement |                |     |            |  |      |  |  |      |
| 11 | Blake GH, Kemmet RK, Jenkins J, Heidel RE, Wilson GA. Milestones as a Guide for Academic Career Development. <i>Fam Med.</i> 2019;51(9):760-765. doi:10.22454/FamMed.2019.109290                                                                                                                                                       |         | Feedback | Learner Assessment |                     |                |     |            |  |      |  |  |      |
| 12 | Hoffman CR, Green MS, Liu J, Iqbal U, Voralu K. Using operating room turnover time by anesthesia trainee level to assess improving systems-based practice milestones. <i>BMC Med Educ.</i> 2018;18(1):295. Published 2018 Dec 5. doi:10.1186/s12909-018-1409-6                                                                         |         |          | Learner Assessment |                     |                |     |            |  |      |  |  | SBP3 |
| 13 | Gaeta T, Mahalingam G, Pyle M, Dam A, Visconti A. Using an alumni survey to target improvements in an emergency medicine training programme. <i>Emerg Med J.</i> 2018;35(3):189-191. doi:10.1136/emered-2017-206692                                                                                                                    |         |          |                    | Program Improvement |                |     |            |  |      |  |  |      |
| 14 | Perry M, Linn A, Munzer BW, et al. Programmatic Assessment in Emergency Medicine: Implementation of Best Practices. <i>J Grad Med Educ.</i> 2018;10(1):84-90. doi:10.4300/JGME-D-17-00094.1                                                                                                                                            |         | Feedback | Learner Assessment | Program Improvement |                |     |            |  |      |  |  |      |
| 15 | Radhakrishnan NS, Lo MC, Bishnoi R, et al. A resident-driven mortality case review innovation to teach and drive system-based practice improvements in the United States. <i>J Educ Eval Health Prof.</i> 2018;15:31. doi:10.3352/jeehp.2018.15.31                                                                                     |         |          |                    |                     | Systems Change |     | Curriculum |  | SBP1 |  |  | SBP3 |

|    |                                                                                                                                                                                                                                                                       |         |          |                    |  |  |            |                  |      |      |      |      |
|----|-----------------------------------------------------------------------------------------------------------------------------------------------------------------------------------------------------------------------------------------------------------------------|---------|----------|--------------------|--|--|------------|------------------|------|------|------|------|
| 16 | Edgar L, Roberts S, Yaghmour NA, et al. Competency Crosswalk: A Multispecialty Review of the Accreditation Council for Graduate Medical Education Milestones Across Four Competency Domains. <i>Acad Med.</i> 2018;93(7):1035-1041. doi:10.1097/ACM.0000000000002059  |         |          | Learner Assessment |  |  |            |                  |      |      |      |      |
| 17 | Plack MM, Goldman EF, Scott AR, et al. Systems Thinking and Systems-Based Practice Across the Health Professions: An Inquiry Into Definitions, Teaching Practices, and Assessment. <i>Teach Learn Med.</i> 2018;30(3):242-254. doi:10.1080/10401334.2017.1398654      |         |          | Learner Assessment |  |  | Curriculum | Systems Thinking |      |      |      |      |
| 18 | Ghaderi KF, Schmidt ST, Drolet BC. Coding and Billing in Surgical Education: A Systems-Based Practice Education Program. <i>J Surg Educ.</i> 2017;74(2):199-202. doi:10.1016/j.jsurg.2016.08.011                                                                      |         |          |                    |  |  | Curriculum |                  |      |      |      | SBP3 |
| 19 | Williamson K, Moreira M, Quattromani E, Smith JL. Remediation Strategies for Systems-Based Practice and Practice-Based Learning and Improvement Milestones. <i>J Grad Med Educ.</i> 2017;9(3):290-293. doi:10.4300/JGME-D-16-00334.1                                  |         | Feedback | Learner Assessment |  |  | Curriculum |                  |      |      |      |      |
| 20 | Grissom MO, Iroku-Malizi T, Peila R, Perez M, Philippe N. Mapping Residency Global Health Experiences to the ACGME Family Medicine Milestones. <i>Fam Med.</i> 2017;49(7):553-557..                                                                                   | Mapping |          |                    |  |  |            |                  |      |      |      |      |
| 21 | Guarner J, Hill CE, Amukele T. Creation and Evaluation of a Laboratory Administration Curriculum for Pathology Residents. <i>Am J Clin Pathol.</i> 2017;148(4):368-373. doi:10.1093/ajcp/aqx085                                                                       |         |          |                    |  |  | Curriculum |                  |      |      |      | SBP3 |
| 22 | Leddy R, Lewis M, Ackerman S, et al. Practical Implications for an Effective Radiology Residency Quality Improvement Program for Milestone Assessment. <i>Acad Radiol.</i> 2017;24(1):95-104. doi:10.1016/j.acra.2016.08.018                                          | Mapping |          | Learner Assessment |  |  | Curriculum |                  | SBP1 |      |      |      |
| 23 | Nordhues HC, Bashir MU, Merry SP, Sawatsky AP. Graduate medical education competencies for international health electives: A qualitative study. <i>Med Teach.</i> 2017;39(11):1128-1137. doi:10.1080/0142159X.2017.1361518                                            |         |          |                    |  |  | Curriculum |                  |      | SBP2 | SBP3 |      |
| 24 | Prince LK, Little DJ, Schexneider KI, Yuan CM. Integrating Quality Improvement Education into the Nephrology Curricular Milestones Framework and the Clinical Learning Environment Review. <i>Clin J Am Soc Nephrol.</i> 2017;12(2):349-356. doi:10.2215/CJN.04740416 |         |          | Learner Assessment |  |  | Curriculum |                  | SBP1 |      |      |      |
| 25 | Williamson K, Moreira M, Quattromani E, Smith JL. Remediation Strategies for Systems-Based Practice and Practice-Based Learning and Improvement Milestones. <i>J Grad Med Educ.</i> 2017 Jun;9(3):290-                                                                |         |          | Learner Assessment |  |  |            |                  | SBP1 | SBP2 | SBP3 |      |

|    |                                                                                                                                                                                                                                                                                                                                    |         |  |                    |  |  |     |            |                  |      |      |      |
|----|------------------------------------------------------------------------------------------------------------------------------------------------------------------------------------------------------------------------------------------------------------------------------------------------------------------------------------|---------|--|--------------------|--|--|-----|------------|------------------|------|------|------|
|    | 293. doi: 10.4300/JGME-D-16-00334.1. PMID: 28638505; PMCID: PMC5476376.                                                                                                                                                                                                                                                            |         |  |                    |  |  |     |            |                  |      |      |      |
| 26 | Prince LK, Little DJ, Schexneider KI, Yuan CM. Integrating Quality Improvement Education into the Nephrology Curricular Milestones Framework and the Clinical Learning Environment Review. <i>Clin J Am Soc Nephrol.</i> 2017 Feb 7;12(2):349-356. doi: 10.2215/CJN.04740416. Epub 2016 Nov 10. PMID: 28174318; PMCID: PMC5293331. |         |  | Learner Assessment |  |  |     | Curriculum |                  | SBP1 |      | SBP3 |
| 27 | D'Eon M. Systems thinking and structural competence in and for medical education. <i>Can Med Educ J.</i> 2017 Feb 24;8(1):e1-e5. PMID: 28344711; PMCID: PMC5344060.                                                                                                                                                                |         |  |                    |  |  |     |            | Systems Thinking |      |      |      |
| 28 | Gee DW, Phitayakorn R, Khatri A, Butler K, Mullen JT, Petrusa ER. A Pilot Study to Gauge Effectiveness of Standardized Patient Scenarios in Assessing General Surgery Milestones. <i>J Surg Educ.</i> 2016;73(6):e1-e8. doi:10.1016/j.jsurg.2016.08.012                                                                            |         |  | Learner Assessment |  |  |     |            |                  |      |      |      |
| 29 | Prober AS, Mehan WA Jr, Bedi HS. Teaching the Healthcare Economics Milestones to Radiology Residents: Our Pilot Curriculum Experience. <i>Acad Radiol.</i> 2016;23(7):885-888. doi:10.1016/j.acra.2016.02.014                                                                                                                      |         |  |                    |  |  |     | Curriculum |                  |      |      | SBP3 |
| 30 | Gillen JR, Ramirez AG, Farineau DW, et al. Using Interdisciplinary Workgroups to Educate Surgery Residents in Systems-Based Practice. <i>J Surg Educ.</i> 2016;73(6):1052-1059. doi:10.1016/j.jsurg.2016.05.017                                                                                                                    |         |  |                    |  |  |     | Curriculum |                  | SBP1 |      | SBP3 |
| 31 | Gee DW, Phitayakorn R, Khatri A, Butler K, Mullen JT, Petrusa ER. A Pilot Study to Gauge Effectiveness of Standardized Patient Scenarios in Assessing General Surgery Milestones. <i>J Surg Educ.</i> 2016 Nov-Dec;73(6):e1-e8. doi: 10.1016/j.jsurg.2016.08.012. PMID: 27886969.                                                  |         |  | Learner Assessment |  |  |     |            |                  | SBP1 |      |      |
| 32 | Yazdani S, Hosseini F, Ahmady S. System based practice: a concept analysis. <i>J Adv Med Educ Prof.</i> 2016 Apr;4(2):45-53. PMID: 27104198; PMCID: PMC4827756.                                                                                                                                                                    |         |  |                    |  |  |     |            |                  | SBP1 | SBP2 | SBP3 |
| 33 | Mamtani M, Scott KR, DeRoos FJ, Conlon LW. Assessing EM Patient Safety and Quality Improvement Milestones Using a Novel Debate Format. <i>West J Emerg Med.</i> 2015;16(6):943-946. doi:10.5811/westjem.2015.9.27269                                                                                                               |         |  | Learner Assessment |  |  | CCC | Curriculum |                  | SBP1 |      |      |
| 34 | Gardner AK, Scott DJ, Choti MA, Mansour JC. Developing a comprehensive resident education evaluation system in the era of milestone assessment. <i>J Surg Educ.</i> 2015;72(4):618-624. doi:10.1016/j.jsurg.2014.12.007                                                                                                            | Mapping |  | Learner Assessment |  |  |     |            |                  |      |      |      |
| 35 | Yuan CM, Prince LK, Oliver JD 3rd, Abbott KC, Nee R. Implementation of nephrology subspecialty curricular milestones. <i>Am J Kidney Dis.</i> 2015;66(1):15-22. doi:10.1053/j.ajkd.2015.01.020                                                                                                                                     | Mapping |  |                    |  |  | CCC |            |                  |      |      |      |

|    |                                                                                                                                                                                                                                                                               |  |          |                    |                     |                |  |            |  |      |      |      |
|----|-------------------------------------------------------------------------------------------------------------------------------------------------------------------------------------------------------------------------------------------------------------------------------|--|----------|--------------------|---------------------|----------------|--|------------|--|------|------|------|
| 36 | Sakai T, Emerick TD, Patel RM. A retrospective review of required projects in systems-based practice in a single anesthesiology residency: a 10-year experience. <i>J Clin Anesth.</i> 2015;27(6):451-456. doi:10.1016/j.jclinane.2015.06.009                                 |  |          |                    |                     | System Change  |  | Curriculum |  |      |      | SBP3 |
| 37 | Harrington DT, Miner TJ, Ng T, Charpentier KP, Richardson P, Cioffi WG. What Shape is Your Resident in? Using a Radar Plot to Guide a Milestone Clinical Competency Discussion. <i>J Surg Educ.</i> 2015;72(6):e294-e298. doi:10.1016/j.jsurg.2015.04.005                     |  | Feedback |                    |                     |                |  |            |  |      |      |      |
| 38 | Chan EY, Deziel DJ, Orkin BA, Wool NL. Systems-based practice: learning the concepts using a teamwork competition model. <i>Am J Surg.</i> 2015;209(1):40-44. doi:10.1016/j.amjsurg.2014.08.034                                                                               |  |          |                    |                     |                |  | Curriculum |  |      |      |      |
| 39 | Pulcrano M, Chahine AA, Saratsis A, Divine-Cadavid J, Narra V, Evans SR. Putting residents in the office: an effective method to teach the systems-based practice competency. <i>J Surg Educ.</i> 2015;72(2):286-290. doi:10.1016/j.jsurg.2014.09.001                         |  |          |                    |                     |                |  | Curriculum |  |      |      | SBP3 |
| 40 | Green M, Amad M, Woodland M. Innovative health systems projects. <i>Clin Teach.</i> 2015;12(1):17-21. doi:10.1111/tct.12218                                                                                                                                                   |  |          |                    |                     | Systems Change |  | Curriculum |  | SBP1 |      | SBP3 |
| 41 | Mamtani M, Scott KR, DeRoos FJ, Conlon LW. Assessing EM Patient Safety and Quality Improvement Milestones Using a Novel Debate Format. <i>West J Emerg Med.</i> 2015 Nov;16(6):943-6. doi: 10.5811/westjem.2015.9.27269. Epub 2015 Nov 12. PMID: 26594296; PMCID: PMC4651600. |  |          | Learner Assessment |                     |                |  | Curriculum |  | SBP1 | SBP2 | SBP3 |
| 42 | Choudhery S, Richter M, Anene A, et al. Practice quality improvement during residency: where do we stand and where can we improve?. <i>Acad Radiol.</i> 2014;21(7):851-858. doi:10.1016/j.acra.2013.11.021                                                                    |  |          |                    | Program Improvement |                |  |            |  |      |      |      |
| 43 | Naritoku WY, Alexander CB, Bennett BD, et al. The pathology milestones and the next accreditation system. <i>Arch Pathol Lab Med.</i> 2014;138(3):307-315. doi:10.5858/arpa.2013-0260-SA                                                                                      |  |          | Learner Assessment |                     |                |  |            |  |      |      |      |
| 44 | Martinez J, Phillips E, Harris C. Where do we go from here? Moving from systems-based practice process measures to true competency via developmental milestones. <i>Med Educ Online.</i> 2014 Jun 27;19:24441. doi: 10.3402/meo.v19.24441. PMID: 24974832; PMCID: PMC4074604. |  |          |                    |                     |                |  | Curriculum |  |      |      |      |
| 45 | Aagaard E, Kane GC, Conforti L, et al. Early feedback on the use of the internal medicine reporting milestones in assessment of resident performance. <i>J Grad Med Educ.</i> 2013;5(3):433-438. doi:10.4300/JGME-D-13-00001.1                                                |  |          | Learner Assessment |                     |                |  |            |  |      |      |      |
| 46 | Wilper AP, Smith CS, Weppner W. Instituting systems-based practice and practice-based                                                                                                                                                                                         |  |          |                    |                     |                |  | Curriculum |  | SBP1 | SBP2 | SBP3 |





|    |                                                                                                                                                                                                                                                                                                                                                                                                                                            |  |  |                    |  |                |  |            |  |      |      |      |
|----|--------------------------------------------------------------------------------------------------------------------------------------------------------------------------------------------------------------------------------------------------------------------------------------------------------------------------------------------------------------------------------------------------------------------------------------------|--|--|--------------------|--|----------------|--|------------|--|------|------|------|
| 55 | Mitchell JD, Parhar P, Narayana A. Teaching and assessing systems-based practice: a pilot course in health care policy, finance, and law for radiation oncology residents. <i>J Grad Med Educ.</i> 2010;2(3):384-388. doi:10.4300/JGME-D-09-00092.1                                                                                                                                                                                        |  |  | Learner Assessment |  |                |  | Curriculum |  |      |      | SBP3 |
| 56 | Mitchell JD, Parhar P, Narayana A. Teaching and assessing systems-based practice: a pilot course in health care policy, finance, and law for radiation oncology residents. <i>J Grad Med Educ.</i> 2010 Sep;2(3):384-8. doi: 10.4300/JGME-D-09-00092.1. PMID: 21976087; PMCID: PMC2951778.                                                                                                                                                 |  |  | Learner Assessment |  |                |  | Curriculum |  |      | SBP2 | SBP3 |
| 57 | Graham MJ, Naqvi Z, Encandela J, Harding KJ, Chatterji M. Systems-based practice defined: taxonomy development and role identification for competency assessment of residents. <i>J Grad Med Educ.</i> 2009 Sep;1(1):49-60. doi: 10.4300/01.01.0009. PMID: 21975707; PMCID: PMC2931181.                                                                                                                                                    |  |  | Learner Assessment |  |                |  | Curriculum |  | SBP1 | SBP2 | SBP3 |
| 58 | Varkey P, Karlapudi S, Rose S, Nelson R, Warner M. A systems approach for implementing practice-based learning and improvement and systems-based practice in graduate medical education [published correction appears in <i>Acad Med.</i> 2009 Jun;84(6):694]. <i>Acad Med.</i> 2009;84(3):335-339. doi:10.1097/ACM.0b013e31819731fb                                                                                                       |  |  |                    |  |                |  | Curriculum |  |      | SBP2 | SBP3 |
| 59 | Johnson JK, Miller SH, Horowitz SD. Systems-Based Practice: Improving the Safety and Quality of Patient Care by Recognizing and Improving the Systems in Which We Work. In: Henriksen K, Battles JB, Keyes MA, Grady ML, editors. <i>Advances in Patient Safety: New Directions and Alternative Approaches (Vol. 2: Culture and Redesign)</i> . Rockville (MD): Agency for Healthcare Research and Quality (US); 2008 Aug. PMID: 21249914. |  |  |                    |  | Systems Change |  |            |  | SBP1 |      |      |
| 60 | Three Sigma I. A systems thinking primer. <a href="http://www.threesigma.com/systems_primer.htm">http://www.threesigma.com/systems_primer.htm</a> . Accessed October 19, 2020                                                                                                                                                                                                                                                              |  |  |                    |  |                |  | Curriculum |  |      |      | SBP3 |
